# Supplementary material for: Variants of DNMT3A cause transcript-specific DNA methylation patterns and affect hematopoiesis
Source: Life Sci Alliance. 2018 Dec 13;1(6):e201800153. doi: 10.26508/lsa.201800153 (PMC6293073; doi:10.26508/lsa.201800153)
Supplement: Supplementary file 1 [file LSA-2018-00153_TableS1.xlsx]

## Sheet: (A) KD Tr.1+3 DNAm
25 HYPERMETHYLATED CpGs upon knockdown of Tr.1+3
Target ID	UCSC Ref. Gene Name	UCSC Ref. Gene Accession	UCSC Ref. Gene Group	Relation to UCSC CpG Island	Chromosome 36	Coordinate 36	Strand	P-value	adj. P-value	ΔDNAm (Tr.1+3-scr.)	Tr.1+3_1	Tr.1+3_2	Tr.1+3_3	Scramble_1	Scramble_2	Scramble_3
cg05941376	WWC1	NM_001161662	Body		5	167769412	F	2.62023e-05	0.0418278	0.171197	0.586621	0.54348	0.54148	0.396033	0.36914	0.392816
cg08197287	AFF1	NM_001166693	Body		4	88171197	R	7.7679e-07	0.0229386	0.164787	0.719207	0.727364	0.705227	0.548514	0.560289	0.548634
cg05450477	E2F3	NM_001949	Body		6	20534824	R	1.56898e-05	0.0367541	0.151876	0.773165	0.751246	0.787705	0.602458	0.627513	0.626517
cg06880767	AAK1	NM_014911	Body		2	69606158	F	6.51269e-06	0.031089	0.147028	0.744917	0.743022	0.772715	0.603183	0.615832	0.600557
cg22027151	PDZRN4	NM_001164595	Body		12	40147058	R	3.75431e-05	0.0455921	0.132769	0.796671	0.796482	0.79252	0.68155	0.669718	0.636098
cg20749792					13	33083166	R	9.79417e-06	0.0320449	0.123368	0.705603	0.700329	0.703605	0.596914	0.577094	0.565425
cg08966889	TRAM2	NM_012288	Body	N_Shore	6	52548388	F	3.17583e-05	0.043587	0.109589	0.595458	0.560328	0.583549	0.473326	0.469539	0.467704
cg10857905					10	79696969	F	4.29434e-06	0.0309348	0.105974	0.573357	0.555289	0.57236	0.461262	0.460856	0.460967
cg19690879	TM2D3	NM_025141	Body	N_Shelf	15	100007286	R	1.87899e-05	0.0388398	0.101224	0.901374	0.881609	0.892341	0.802473	0.785569	0.783609
cg24539599	MCC	NM_001085377	TSS1500	S_Shore	5	112852819	R	2.96636e-05	0.0434938	0.0949485	0.453439	0.47167	0.47815	0.364571	0.376613	0.377229
cg21091841					13	33149239	F	2.60582e-05	0.0418278	0.0943167	0.741821	0.729351	0.755785	0.64642	0.65335	0.644236
cg09011316				S_Shore	1	16417537	F	4.16364e-05	0.0482854	0.0932164	0.649259	0.619927	0.638306	0.53809	0.547432	0.542319
cg18756771	DUSP5	NM_004419	Body	S_Shelf	10	112251984	R	1.10637e-05	0.03396	0.0919744	0.752118	0.733087	0.737322	0.652812	0.646237	0.647554
cg01794805	RARB	NM_016152	5'UTR		3	25468811	F	3.23518e-06	0.0306227	0.0916183	0.757662	0.762847	0.75826	0.668467	0.673361	0.662087
cg14101659	EXOC2	NM_018303	Body		6	448773	R	2.26836e-05	0.0411939	0.0880993	0.501141	0.514469	0.500652	0.426494	0.407847	0.417622
cg16225218	FBXW11	NM_033645	Body		5	171305300	R	7.0351e-06	0.031089	0.0878421	0.805844	0.799388	0.800208	0.708732	0.710772	0.72241
cg00641828	PTK2	NM_153831	Body		8	141784633	R	5.74315e-06	0.031089	0.0868094	0.875065	0.864197	0.876598	0.784884	0.787871	0.782676
cg09732284	INPP5A	NM_005539	Body	Island	10	134389979	R	5.21878e-06	0.031089	0.0858246	0.836189	0.83245	0.835986	0.750485	0.754549	0.742118
cg20808613	AEN	NM_022767	5'UTR	S_Shelf	15	86969309	R	1.76043e-05	0.0385101	0.0794272	0.830459	0.833916	0.821264	0.74388	0.756563	0.746916
cg15393585					17	76889904	F	1.36395e-05	0.0359983	0.0785117	0.757623	0.750009	0.763778	0.6735	0.681743	0.680631
cg07283441	PVT1	NR_003367	Body		8	129101005	R	5.70053e-06	0.031089	0.0776232	0.333652	0.337502	0.335225	0.254087	0.262667	0.256755
cg12825470	ATR	NM_001184	Body	S_Shelf	3	143652393	R	3.68004e-05	0.0451126	0.0769368	0.743017	0.761996	0.755785	0.670936	0.682166	0.676886
cg00336291	CHCHD6	NM_032343	Body	Island	3	128151209	F	2.60273e-05	0.0418278	0.0753813	0.825733	0.808308	0.823714	0.742407	0.74477	0.744435
cg26078407	HDAC4	NM_006037	Body		2	239889999	R	2.10803e-05	0.0402651	0.0701196	0.826852	0.821039	0.833061	0.75996	0.751749	0.758886
cg11876912	SYNPR	NM_144642	3'UTR		3	63577049	F	4.35821e-05	0.0492925	0.0540083	0.728379	0.727064	0.732799	0.67294	0.673899	0.679378
327 HYPOMETHYLATED CpGs upon knockdown of Tr.1+3
Target ID	UCSC Ref. Gene Name	UCSC Ref. Gene Accession	UCSC Ref. Gene Group	Relation to UCSC CpG Island	Chromosome 36	Coordinate 36	Strand	P-value	adj. P-value	ΔDNAm (Tr.1+3-scr.)	Tr.1+3_1	Tr.1+3_2	Tr.1+3_3	Scramble_1	Scramble_2	Scramble_3
cg07956751	GIMAP7	NM_153236	TSS200		7	149842872	R	2.78032e-05	0.0431765	-0.0577741	0.0868546	0.0934905	0.0920558	0.146414	0.151321	0.147988
cg08497917					4	102099308	R	3.25644e-05	0.0437016	-0.0587393	0.767164	0.769921	0.776872	0.829114	0.832292	0.828768
cg11827925	AQP1	NM_198098	1stExon		7	30918023	F	3.74505e-05	0.0455921	-0.0587562	0.338079	0.336933	0.334697	0.391395	0.392767	0.401816
cg02630045	TRIM39	NM_172016	Body		6	30411558	F	3.0303e-05	0.0434938	-0.0639839	0.799679	0.787516	0.798575	0.857435	0.859656	0.860633
cg10440877					2	208086720	F	3.37361e-05	0.0444696	-0.0642349	0.795029	0.792061	0.784171	0.853582	0.859896	0.850487
cg09527615				Island	11	94522998	F	3.10077e-05	0.043587	-0.0646528	0.755174	0.765178	0.753943	0.819796	0.826974	0.821484
cg15072832	AHDC1	NM_001029882	5'UTR	S_Shore	1	27775326	R	2.99955e-05	0.0434938	-0.0657534	0.209937	0.208225	0.207467	0.267391	0.273514	0.281985
cg21663219	TNFRSF13C	NM_052945	TSS1500	S_Shore	22	40653343	R	2.75749e-05	0.0431765	-0.0660627	0.682007	0.67548	0.689517	0.748569	0.75004	0.746584
cg17661220					20	3641179	F	3.54453e-05	0.0449943	-0.0666015	0.457207	0.470566	0.45987	0.526258	0.527118	0.534071
cg13445854					9	132389219	R	3.0432e-05	0.0434938	-0.0678158	0.720593	0.708587	0.711301	0.785652	0.775707	0.782569
cg06057079				N_Shore	4	2018318	F	2.38987e-05	0.0413606	-0.0681746	0.228883	0.222593	0.216516	0.291309	0.294581	0.286627
cg11466832	LPIN1	NM_145693	TSS1500	N_Shore	2	11803011	R	2.0303e-05	0.040189	-0.0683791	0.789924	0.791308	0.787142	0.864459	0.857612	0.851441
cg01557792	KIAA0247	NM_014734	Body		14	69232508	F	1.88201e-05	0.0388398	-0.0685832	0.146163	0.138337	0.151445	0.214152	0.213048	0.214494
cg16225773					3	32977882	F	2.81269e-05	0.0431765	-0.0688303	0.620725	0.617286	0.614295	0.677682	0.690037	0.691078
cg22777668	LAG3	NM_002286	TSS1500	N_Shore	12	6751564	F	8.43995e-06	0.0319006	-0.0692807	0.631062	0.632422	0.631722	0.698703	0.69928	0.705064
cg15035421	ATP11B	NM_014616	Body		3	184114543	R	2.11024e-05	0.0402651	-0.0700012	0.18668	0.181808	0.174808	0.250107	0.255985	0.247208
cg07536144				Island	4	25639680	F	2.88354e-05	0.0434938	-0.0701322	0.215244	0.221357	0.230215	0.293214	0.29603	0.287968
cg11377213	FRMD4B	NM_015123	Body		3	69452908	F	3.54597e-05	0.0449943	-0.0705423	0.32974	0.334032	0.330443	0.392583	0.402508	0.41075
cg07584558	DEDD2	NM_133328	3'UTR	N_Shore	19	47395068	F	2.53646e-05	0.0418278	-0.0711973	0.2858	0.27106	0.274768	0.347182	0.345695	0.352342
cg11268190	TNFRSF1A	NM_001065	Body	S_Shelf	12	6312787	F	2.81378e-05	0.0431765	-0.0722501	0.755507	0.766599	0.761443	0.836945	0.825193	0.838161
cg11909137	SMAD7	NM_005904	Body		18	44715200	R	3.38976e-05	0.0444696	-0.0743853	0.195648	0.196688	0.198668	0.275887	0.259777	0.278496
cg00983437	TCF15	NM_004609	TSS1500	S_Shore	20	540164	R	1.5622e-05	0.0367541	-0.0745915	0.167159	0.163877	0.165544	0.246478	0.231847	0.24203
cg05399244	RPH3AL	NM_006987	5'UTR		17	179611	R	6.59081e-06	0.031089	-0.074609	0.212285	0.217914	0.21791	0.293319	0.287365	0.291251
cg18446578	SEMA6A	NM_020796	5'UTR	N_Shore	5	115936221	F	5.60813e-06	0.031089	-0.0746217	0.269326	0.272373	0.26513	0.342995	0.343465	0.344235
cg21274136	MIR548H4	NR_031680	Body	N_Shore	15	67153101	F	3.15213e-05	0.043587	-0.0758435	0.782066	0.78032	0.772062	0.864253	0.848323	0.849402
cg15504041	UROS	NM_000375	3'UTR		10	127467249	R	4.12072e-05	0.0482651	-0.0759567	0.280747	0.267043	0.270167	0.3385	0.353365	0.353962
cg19658665	MCF2L	NM_001112732	Body	N_Shelf	13	112700297	R	1.96146e-05	0.0394176	-0.0770442	0.349582	0.357501	0.34975	0.421188	0.436912	0.429865
cg23039189	PPFIBP2	NM_003621	TSS1500	N_Shore	11	7490604	F	9.53824e-06	0.0320148	-0.077789	0.0948432	0.0984503	0.104822	0.174582	0.174486	0.182414
cg20732160	PFKFB4	NM_004567	Body	N_Shelf	3	48565044	R	3.63109e-05	0.0451126	-0.0781192	0.713535	0.709539	0.72412	0.793744	0.785295	0.802513
cg05279413	MAFK	NM_002360	5'UTR	S_Shore	7	1538853	F	3.90652e-05	0.0464433	-0.0788972	0.0929093	0.074701	0.0923796	0.171608	0.159985	0.165089
cg22143387	LMAN2	NM_006816	3'UTR	Island	5	176691687	R	1.24611e-05	0.0354911	-0.0792532	0.770587	0.776011	0.766026	0.845649	0.847315	0.857421
cg01534572	CBFA2T3	NM_005187	Body		16	87552058	R	3.02507e-05	0.0434938	-0.0794291	0.0757755	0.0686602	0.0844404	0.154627	0.148475	0.164061
cg23051299	C2orf3	NM_003203	TSS200	S_Shore	2	75791797	R	9.67923e-06	0.0320148	-0.0796839	0.448558	0.451714	0.449266	0.537643	0.526788	0.524158
cg04990420	ADORA2A	NM_000675	5'UTR	S_Shelf	22	23154362	R	2.86994e-05	0.0434938	-0.0802261	0.6792	0.67159	0.663505	0.743093	0.753147	0.758733
cg20713639				N_Shelf	11	64942260	F	1.78888e-05	0.0386997	-0.0802575	0.0994324	0.114802	0.105934	0.191338	0.180599	0.189004
cg09085220	C16orf68	NM_024109	Body		16	8643934	F	3.86072e-05	0.0463016	-0.0805009	0.786799	0.801042	0.789129	0.862653	0.874171	0.88165
cg21032008	GRM7	NM_181874	Body		3	7699717	R	1.82866e-05	0.0387522	-0.0805878	0.108244	0.117717	0.118981	0.194417	0.188466	0.203822
cg18747408					10	130731087	R	6.13923e-06	0.031089	-0.0807361	0.247489	0.242359	0.248211	0.325986	0.322126	0.332156
cg07011778				N_Shore	8	144176945	R	4.24318e-05	0.0489749	-0.0817248	0.226628	0.215139	0.209727	0.293018	0.30992	0.293731
cg04131799				Island	2	96556733	R	2.56533e-05	0.0418278	-0.081747	0.294628	0.285721	0.282479	0.365482	0.362738	0.379849
cg19715771	CBX4	NM_003655	Body	N_Shore	17	75425507	F	2.36896e-05	0.0413606	-0.0820062	0.180877	0.164942	0.178731	0.251738	0.254418	0.264414
cg24585377	RPS6KA1	NM_002953	Body	S_Shore	1	26730361	R	1.18336e-05	0.0347025	-0.0827395	0.379675	0.368112	0.36362	0.451787	0.451343	0.456495
cg26819753	RGL2	NR_028387	Body	N_Shore	6	33373291	R	3.23689e-05	0.043587	-0.0833191	0.157199	0.167244	0.174371	0.240103	0.251224	0.257445
cg25408950	NEK7	NM_133494	3'UTR		1	196556703	F	2.10458e-05	0.0402651	-0.0836571	0.648737	0.651268	0.661242	0.731954	0.747417	0.732846
cg21746120	LRP5	NM_002335	Body		11	67898810	R	1.32478e-05	0.0355465	-0.0837371	0.721715	0.719793	0.704777	0.798945	0.800614	0.797938
cg06953130	C10orf47	NM_153256	3'UTR	Island	10	11952416	R	2.99679e-05	0.0434938	-0.0853771	0.574898	0.582197	0.559203	0.662333	0.653931	0.656166
cg12378753				N_Shore	10	116517191	R	3.60707e-05	0.0451126	-0.0854674	0.318155	0.311013	0.322224	0.388832	0.409251	0.409711
cg25462303	GCET2	NM_152785	TSS200		3	113334846	F	2.218e-05	0.0410182	-0.0855979	0.169201	0.166988	0.159022	0.250884	0.24034	0.260781
cg06480171					2	37706986	F	1.85527e-05	0.0388398	-0.0857524	0.235728	0.223855	0.218664	0.305413	0.318624	0.311468
cg24783510	FCHO1	NM_001161357	5'UTR	S_Shelf	19	17723150	R	3.45229e-06	0.0306227	-0.0858769	0.269531	0.264965	0.261494	0.347527	0.353333	0.352761
cg19844326	ANK1	NM_001142446	TSS1500	S_Shore	8	41874566	F	7.0304e-06	0.031089	-0.0858871	0.162839	0.154656	0.165118	0.243828	0.253021	0.243425
cg24136318	2009-09-01	NM_001113492	Body		17	72965725	F	4.3703e-05	0.0492925	-0.0868122	0.519861	0.544344	0.535763	0.614712	0.617766	0.627926
cg11238542					2	64284974	R	1.48051e-05	0.0367541	-0.0869206	0.29033	0.281399	0.295326	0.372377	0.370632	0.384808
cg08402433	CARD11	NM_032415	5'UTR		7	2986681	F	4.36501e-05	0.0492925	-0.0875331	0.264794	0.288204	0.262051	0.359916	0.358754	0.358979
cg23531640	ETS1	NM_001143820	Body		11	127882462	F	4.04547e-05	0.0478081	-0.0878012	0.169536	0.172208	0.180737	0.255947	0.253159	0.276779
cg20893203					6	41607777	R	4.15882e-05	0.0482854	-0.088	0.317312	0.307259	0.320831	0.388847	0.41181	0.408745
cg15206473	ANKS1A	NM_015245	Body		6	35157591	R	1.92546e-05	0.0392924	-0.088188	0.397361	0.387551	0.394135	0.49055	0.469825	0.483235
cg20671781					10	42946477	F	3.79495e-05	0.0456653	-0.0885999	0.787448	0.771321	0.786034	0.858654	0.880422	0.871526
cg12420683	KIAA0087	NR_022006	TSS200		7	26545072	R	3.62964e-05	0.0451126	-0.0887414	0.143729	0.137767	0.157651	0.245447	0.22652	0.233403
cg00547530	CLUAP1	NM_015041	Body		16	3499688	F	2.54417e-05	0.0418278	-0.0894586	0.415457	0.404568	0.39655	0.48491	0.499958	0.500083
cg00907272					10	73756788	F	6.50523e-06	0.031089	-0.0896398	0.23679	0.22329	0.229387	0.315821	0.324933	0.317633
cg10851739					12	130561972	F	1.62924e-05	0.0372817	-0.0896826	0.133223	0.142683	0.130645	0.21659	0.22366	0.235348
cg14511652	FIBCD1	NM_032843	Body	S_Shelf	9	132773623	R	3.46691e-05	0.0448537	-0.089718	0.353821	0.365273	0.356398	0.443171	0.438804	0.462671
cg00055073				Island	2	43251622	R	3.21494e-05	0.043587	-0.0900535	0.380346	0.368715	0.362616	0.456702	0.472542	0.452593
cg25384897	TAP1	NM_000593	Body	S_Shore	6	32921522	R	2.55956e-05	0.0418278	-0.0905797	0.143017	0.154383	0.159192	0.231161	0.246829	0.250341
cg21130221	KCNQ1	NM_000218	Body		11	2804886	R	3.43449e-05	0.0445799	-0.0906136	0.719169	0.730753	0.745515	0.828329	0.818085	0.820864
cg25588787				Island	5	154007449	F	7.08368e-06	0.031089	-0.0910543	0.432505	0.423785	0.425787	0.519333	0.525545	0.510363
cg03243965	HSH2D	NM_032855	5'UTR		19	16115516	F	1.05872e-05	0.0336618	-0.093789	0.107965	0.102535	0.101991	0.191045	0.193029	0.209784
cg21869609	LINGO3	NM_001101391	Body	Island	19	2242613	R	3.49331e-05	0.0449017	-0.0939316	0.650782	0.660392	0.672808	0.763876	0.74397	0.757931
cg15455864	SYMPK	NM_004819	Body	S_Shore	19	51011238	R	9.02212e-06	0.0319006	-0.0939525	0.102871	0.104874	0.108606	0.188954	0.208615	0.20064
cg22211672	CCDC33	NM_025055	Body		15	72397419	R	2.17842e-05	0.0408023	-0.0942334	0.582966	0.592906	0.585717	0.669125	0.693866	0.681299
cg07327405	LOC146880	NR_026899	Body	Island	17	60203371	R	9.94297e-06	0.0322651	-0.0944916	0.3315	0.319419	0.333869	0.430761	0.421454	0.416048
cg09253696	TRIM47	NM_033452	Body	Island	17	71385124	F	1.99592e-06	0.0272472	-0.0945644	0.257566	0.247986	0.255365	0.349359	0.346693	0.348558
cg06189394	LRIG1	NM_015541	Body		3	66616740	F	7.67409e-06	0.031089	-0.095721	0.652075	0.650565	0.651754	0.749658	0.736083	0.755815
cg02413874	LOC100134368	NR_024453	Body	S_Shore	16	373642	F	3.69204e-05	0.0451126	-0.0959738	0.312612	0.332458	0.309499	0.405247	0.412945	0.424298
cg23696886	PDLIM2	NM_198042	TSS1500	S_Shore	8	22493138	R	3.68618e-05	0.0451126	-0.0961101	0.169716	0.156305	0.165337	0.248318	0.255665	0.275707
cg01089001	GALNTL4	NM_198516	Body		11	11567318	F	1.21033e-05	0.0349752	-0.0969304	0.143173	0.144747	0.157992	0.247698	0.236006	0.252998
cg08055131	FLT3	NM_004119	Body	N_Shore	13	27571714	R	2.567e-05	0.0418278	-0.0970833	0.314065	0.323981	0.299958	0.419225	0.405398	0.40463
cg17517296					2	42960962	F	3.42107e-05	0.0445517	-0.0975826	0.454475	0.44846	0.467577	0.559624	0.540272	0.563364
cg03837680	TBC1D16	NM_019020	Body	S_Shore	17	75582124	F	3.09331e-05	0.043587	-0.0976829	0.626455	0.651962	0.639807	0.727228	0.743511	0.740533
cg27625456	LGALS9	NR_024043	Body		17	22982394	R	2.92393e-05	0.0434938	-0.0977067	0.121794	0.115867	0.0980222	0.214004	0.199402	0.215398
cg22751954					6	143065625	R	4.12595e-06	0.0308195	-0.0983116	0.23977	0.232782	0.224879	0.327784	0.328936	0.335645
cg06817455					1	210693097	F	1.40168e-05	0.0367494	-0.0984025	0.287978	0.29324	0.297049	0.380352	0.403867	0.389255
cg20465954	SOAT2	NM_003578	TSS1500		12	51783188	R	3.2195e-05	0.043587	-0.0984485	0.413356	0.425821	0.413505	0.500431	0.519964	0.527633
cg13683534	GPSM1	NM_001145638	TSS1500		9	138340897	R	4.58233e-06	0.031089	-0.0984715	0.372711	0.364212	0.361074	0.461231	0.472098	0.460083
cg27020362	MGC29506	NM_016459	3'UTR		5	138751293	R	3.48037e-05	0.0448811	-0.0985815	0.646642	0.640636	0.617194	0.73049	0.731731	0.737995
cg20199120				N_Shelf	X	13493693	F	4.89727e-06	0.031089	-0.0994206	0.109281	0.120845	0.124545	0.222922	0.216841	0.21317
cg06776173				Island	1	46705367	F	5.3574e-06	0.031089	-0.0997555	0.293938	0.302125	0.31071	0.398121	0.400367	0.407551
cg15978565	LPIN1	NM_145693	5'UTR		2	11811915	R	3.63551e-06	0.0306227	-0.100151	0.0990067	0.0899698	0.0958935	0.191567	0.190399	0.203357
cg13740985	PSAT1	NM_058179	Body		9	80120233	R	3.00718e-05	0.0434938	-0.100242	0.386238	0.381632	0.385651	0.46678	0.49564	0.491828
cg05614346	GRK6	NM_001004106	Body	N_Shelf	5	176791214	R	2.9754e-05	0.0434938	-0.100965	0.531257	0.519073	0.537013	0.619403	0.626123	0.644712
cg18534312	KCNK9	NM_016601	Body		8	140711766	F	4.34741e-05	0.0492925	-0.101275	0.39078	0.370083	0.373271	0.467289	0.476659	0.49401
cg14989252	GAPT	NM_152687	TSS1500		5	57822206	R	3.20637e-05	0.043587	-0.101629	0.153116	0.146992	0.124006	0.249388	0.237905	0.241707
cg23056923	C10orf105	NM_001168390	TSS200		10	73167635	R	2.34015e-05	0.0413606	-0.102422	0.339041	0.32276	0.309226	0.421986	0.42697	0.429337
cg01218206	SIK3	NM_025164	Body		11	116439187	R	4.10315e-05	0.0482651	-0.102548	0.774495	0.765631	0.755656	0.862131	0.884678	0.856619
cg07773272	PSTPIP2	NM_024430	Body	N_Shore	18	41862103	F	2.52669e-05	0.0418278	-0.102669	0.305629	0.312889	0.31556	0.397257	0.419219	0.425608
cg07367601					1	233180965	F	8.49698e-06	0.0319006	-0.10325	0.745607	0.741616	0.740546	0.837831	0.840491	0.859198
cg02431260	ESAM	NM_138961	Body	Island	11	124134098	F	4.16978e-05	0.0482854	-0.103356	0.257229	0.27994	0.279483	0.388605	0.373814	0.364301
cg13274149	C9orf167	NM_017723	3'UTR	Island	9	139295214	R	3.52115e-05	0.0449676	-0.103917	0.214022	0.245855	0.223914	0.327025	0.330245	0.338273
cg10806146	SLC20A2	NM_006749	5'UTR		8	42476028	R	2.42936e-05	0.0414553	-0.104351	0.0809728	0.0832645	0.0966407	0.177634	0.191657	0.204639
cg01801603	ZHX2	NM_014943	5'UTR	S_Shore	8	123864614	R	3.13002e-05	0.043587	-0.104722	0.645477	0.631433	0.63174	0.72907	0.735965	0.75778
cg13084345	CSF3R	NM_172313	TSS1500		1	36721320	F	3.48804e-06	0.0306227	-0.104959	0.192928	0.175368	0.180008	0.286076	0.289697	0.287407
cg05513069	PSTPIP2	NM_024430	Body	Island	18	41862307	F	5.92421e-06	0.031089	-0.105644	0.324608	0.321189	0.310832	0.416741	0.433701	0.42312
cg27021553	CCND1	NM_053056	Body	S_Shore	11	69171964	R	2.34621e-05	0.0413606	-0.106204	0.584818	0.557906	0.556076	0.670498	0.672974	0.673939
cg03106207				S_Shelf	2	96178478	R	2.23797e-05	0.0410182	-0.106606	0.56806	0.539772	0.545594	0.653122	0.655618	0.664505
cg25306480	PWWP2B	NM_138499	3'UTR		10	134076507	F	2.58292e-05	0.0418278	-0.10764	0.71188	0.741467	0.731508	0.829693	0.833704	0.844378
cg08620751				Island	19	1802750	F	3.58974e-05	0.0451126	-0.107956	0.56711	0.568196	0.564123	0.654029	0.680601	0.688667
cg25006194					12	92812684	R	1.55149e-05	0.0367541	-0.108104	0.303276	0.293739	0.286302	0.401528	0.39071	0.415392
cg05874176	TLK1	NM_001136554	5'UTR	S_Shelf	2	171728225	F	3.87121e-05	0.0463016	-0.108133	0.346529	0.359926	0.325557	0.459839	0.447164	0.449408
cg03467087	SYNJ2	NM_003898	Body		6	158368122	R	2.80563e-05	0.0431765	-0.10844	0.123891	0.146412	0.137011	0.239197	0.259141	0.234295
cg02916283				S_Shelf	14	89157545	R	2.92677e-05	0.0434938	-0.108721	0.712184	0.686406	0.718469	0.811123	0.819559	0.812541
cg17161421	PRRT1	NM_030651	TSS1500	N_Shore	6	32228055	R	3.22957e-05	0.043587	-0.109094	0.414021	0.388824	0.420235	0.514596	0.52465	0.511116
cg05486924	C3orf21	NM_152531	Body	N_Shore	3	196460854	F	3.23185e-05	0.043587	-0.109615	0.424434	0.415364	0.4454	0.527003	0.544911	0.54213
cg20127859	C8orf73	NM_001100878	TSS1500	N_Shelf	8	144727414	F	4.27293e-05	0.0490324	-0.109681	0.626504	0.609156	0.616454	0.741651	0.707973	0.731534
cg19767562	TFR2	NM_003227	Body	Island	7	100062373	F	3.66485e-05	0.0451126	-0.110922	0.143828	0.142873	0.126985	0.231593	0.250507	0.264354
cg09376835	ASAP1	NM_018482	Body		8	131416476	R	5.02812e-06	0.031089	-0.110991	0.313551	0.332555	0.332447	0.43282	0.438803	0.439903
cg12604162	KCNAB2	NM_003636	TSS1500	N_Shore	1	6008735	R	3.00515e-05	0.0434938	-0.11122	0.240796	0.216193	0.224919	0.337481	0.325802	0.352283
cg18731202	TGFA	NM_003236	Body		2	70588040	R	3.19524e-05	0.043587	-0.111576	0.724085	0.713784	0.73776	0.827131	0.852978	0.830248
cg25953692	DDAH2	NM_013974	Body	N_Shore	6	31803394	F	1.61267e-05	0.0371188	-0.11182	0.141243	0.134231	0.148521	0.23677	0.261486	0.261201
cg16719560	VAMP5	NM_006634	TSS200	Island	2	85664932	F	8.85094e-06	0.0319006	-0.111906	0.200321	0.218846	0.202775	0.325571	0.308538	0.32355
cg25075794	AQP1	NM_198098	TSS200		7	30917917	R	3.14598e-05	0.043587	-0.111925	0.334713	0.326917	0.348076	0.43598	0.46534	0.44416
cg03851835	SLC35F2	NM_017515	Body		11	107216952	R	3.39229e-05	0.0444696	-0.111933	0.19982	0.168121	0.166525	0.291937	0.288351	0.289978
cg15601264					17	52219696	F	2.49701e-06	0.0274596	-0.111949	0.164562	0.167684	0.172856	0.273474	0.289742	0.277735
cg04492943				N_Shore	16	22108480	R	1.10657e-05	0.03396	-0.112059	0.156192	0.149136	0.146297	0.24733	0.267005	0.273466
cg21531604	LFNG	NM_001166355	TSS1500		7	2518124	F	1.54866e-05	0.0367541	-0.112375	0.40228	0.416966	0.427758	0.52858	0.53711	0.518438
cg02635407	SH3TC1	NM_018986	TSS1500		4	8251449	F	6.14274e-06	0.031089	-0.112453	0.204666	0.20177	0.187201	0.307008	0.304181	0.319808
cg20316440	RERE	NM_001042682	5'UTR		1	8380345	R	3.30084e-06	0.0306227	-0.112744	0.335425	0.32876	0.320674	0.44877	0.440378	0.433943
cg06132620	NHSL1	NM_001144060	1stExon		6	138862196	R	1.43045e-05	0.0367541	-0.112806	0.432993	0.418423	0.432605	0.530101	0.536728	0.555609
cg23763137	ADORA2A	NM_000675	TSS200	S_Shelf	22	23153509	R	5.34396e-06	0.031089	-0.113225	0.641738	0.627957	0.63322	0.757091	0.73713	0.748368
cg04947157	TMC8	NM_152468	Body	S_Shore	17	73640076	F	8.7081e-06	0.0319006	-0.113814	0.151811	0.133549	0.136123	0.259421	0.242889	0.260616
cg13299698	NPR3	NM_000908	Body		5	32770325	R	2.13633e-06	0.0274596	-0.114142	0.266868	0.280346	0.282625	0.390974	0.394321	0.386973
cg03753191	EPSTI1	NM_033255	TSS1500	S_Shore	13	42464902	F	2.18472e-05	0.0408023	-0.114806	0.240236	0.242458	0.259666	0.348599	0.361428	0.37675
cg24840062	CDCP1	NM_022842	Body		3	45135274	F	1.48133e-05	0.0367541	-0.115191	0.201496	0.202518	0.214047	0.306238	0.32191	0.335487
cg07338715				S_Shore	2	109015713	R	7.66341e-06	0.031089	-0.115722	0.66974	0.673314	0.690287	0.78494	0.793632	0.801935
cg01088404	HDAC7	NM_001098416	TSS1500	S_Shore	12	46500790	F	3.00382e-05	0.0434938	-0.115752	0.206453	0.229738	0.232831	0.328651	0.334736	0.352891
cg00232092	FBXL18	NM_024963	3'UTR	N_Shelf	7	5485413	R	2.02305e-05	0.040189	-0.116137	0.553728	0.558307	0.573469	0.692257	0.66373	0.677928
cg19627006	CAPG	NM_001747	5'UTR	N_Shelf	2	85491184	F	1.27729e-05	0.0355331	-0.116155	0.371784	0.348025	0.355099	0.463921	0.484032	0.47542
cg16304656	PRKAR1B	NM_001164759	Body	N_Shelf	7	607863	R	1.82351e-05	0.0387522	-0.116593	0.167718	0.150895	0.163235	0.266684	0.270642	0.2943
cg23829102					4	124696144	F	3.64641e-05	0.0451126	-0.116632	0.206384	0.216486	0.238111	0.324269	0.338464	0.348142
cg08173263	LPHN1	NM_014921	Body	S_Shelf	19	14137911	R	1.53157e-05	0.0367541	-0.117468	0.609107	0.589582	0.601155	0.702269	0.728579	0.7214
cg19143990	LYSMD2	NM_153374	Body	N_Shore	15	49816444	R	1.59616e-05	0.0369537	-0.117656	0.148592	0.175961	0.163346	0.281097	0.269892	0.289877
cg25298189	ARID3A	NM_005224	Body	S_Shelf	19	886259	R	6.69596e-06	0.031089	-0.118499	0.350982	0.363355	0.362525	0.466945	0.474814	0.490599
cg13654836	MSI2	NM_138962	Body		17	52720911	R	8.4171e-06	0.0319006	-0.119143	0.667384	0.656172	0.654722	0.786761	0.76345	0.785497
cg10968027					11	95045118	R	4.29768e-06	0.0309348	-0.119295	0.357436	0.370722	0.380148	0.494341	0.487299	0.484552
cg14480530	DENND3	NM_014957	Body	Island	8	142252689	F	2.69885e-05	0.0429098	-0.119843	0.605539	0.624868	0.620449	0.720038	0.736885	0.753463
cg10861599	TNFSF4	NM_003326	TSS200		1	171443146	R	2.19527e-05	0.0408023	-0.11991	0.106773	0.0939109	0.0930654	0.204777	0.211603	0.237101
cg09233980	GRAMD4	NM_015124	Body	Island	22	45448463	F	2.7776e-05	0.0431765	-0.119984	0.601105	0.617477	0.604596	0.713386	0.747505	0.72224
cg07579839	MFSD10	NM_001120	Body	Island	4	2903546	F	3.60789e-05	0.0451126	-0.120529	0.324068	0.307107	0.312182	0.422888	0.425109	0.456947
cg11427534				N_Shore	5	132183132	R	3.3929e-06	0.0306227	-0.120904	0.458606	0.448629	0.43832	0.569204	0.563241	0.575822
cg27408541	TANC1	NM_033394	Body		2	159656861	R	3.77735e-05	0.0456284	-0.121036	0.264796	0.247616	0.228932	0.379767	0.356943	0.367742
cg07192734	ACSF3	NM_174917	Body	N_Shore	16	87713290	R	3.2978e-05	0.0438111	-0.121565	0.307488	0.29633	0.308211	0.418071	0.410761	0.447891
cg24591861	MAP2K1	NM_002755	Body		15	64484227	F	4.34808e-05	0.0492925	-0.1216	0.392039	0.35174	0.366462	0.483218	0.491957	0.499865
cg20293352	CD34	NM_001773	TSS1500	S_Shore	1	206151565	F	5.19592e-06	0.031089	-0.122097	0.128825	0.147034	0.120706	0.253707	0.252813	0.256336
cg13541073					17	58859341	R	2.04459e-05	0.0402651	-0.122662	0.601682	0.613221	0.603572	0.708792	0.743229	0.73444
cg10809958				Island	7	2724531	R	1.70251e-06	0.0261709	-0.122818	0.704486	0.708912	0.708771	0.819862	0.838873	0.831889
cg03915752	PDE4B	NM_001037341	Body		1	66574793	R	1.19402e-05	0.0347577	-0.123	0.253939	0.262598	0.234553	0.381695	0.364184	0.374212
ch.2.20642108R					2	20642108	F	6.6665e-06	0.031089	-0.123334	0.103573	0.0853889	0.0986799	0.228496	0.206628	0.222521
cg19785773				N_Shelf	8	142467594	F	1.26664e-05	0.0355331	-0.123957	0.360932	0.373673	0.36349	0.4726	0.503683	0.493684
cg21633059					5	146843868	R	1.32887e-05	0.0355465	-0.124627	0.307343	0.290881	0.296422	0.405713	0.435631	0.427184
cg25210609	PQLC2	NM_001040126	5'UTR	S_Shelf	1	19514880	R	8.88637e-06	0.0319006	-0.125065	0.231766	0.210267	0.221868	0.336947	0.342358	0.359789
cg12535569	PTPRCAP	NM_005608	TSS200	S_Shore	11	66961867	F	2.355e-05	0.0413606	-0.125104	0.162179	0.140382	0.15207	0.284583	0.257377	0.287983
cg01759628				N_Shore	1	233333276	R	1.30946e-05	0.0355465	-0.125264	0.368411	0.347923	0.365753	0.488749	0.497987	0.471143
cg09941713	CHD7	NM_017780	Body		8	61867886	R	7.36799e-06	0.031089	-0.12549	0.128689	0.140134	0.144458	0.254199	0.257259	0.278294
cg15720535	AGPAT2	NM_006412	TSS1500	Island	9	138702406	R	3.81366e-06	0.0308195	-0.125925	0.596632	0.59617	0.586242	0.713035	0.711293	0.732492
cg15538767					5	149850588	F	1.50285e-05	0.0367541	-0.126113	0.484071	0.482532	0.509897	0.618479	0.608217	0.628144
cg27285720	GBP4	NM_052941	TSS200		1	89437370	R	1.09715e-05	0.03396	-0.12686	0.0843995	0.111109	0.0988471	0.228467	0.233624	0.212845
cg01167274	ITGB2	NM_001127491	5'UTR		21	45158642	F	1.26198e-05	0.0355331	-0.127946	0.23554	0.23066	0.233862	0.340774	0.371853	0.371272
cg12590902	ERI3	NM_024066	Body		1	44544572	R	7.28092e-06	0.031089	-0.127953	0.598976	0.583041	0.608894	0.732162	0.714918	0.72769
cg13861904	NOTCH1	NM_017617	Body	N_Shore	9	138547827	F	2.41841e-05	0.0414471	-0.128437	0.0632276	0.0817214	0.0426691	0.18344	0.197515	0.191972
cg10351914	MFAP4	NM_002404	TSS200		17	19231283	F	1.95778e-05	0.0394176	-0.128663	0.290821	0.288658	0.300708	0.404661	0.419445	0.44207
cg04473569	CLDN15	NM_014343	1stExon		7	100667727	R	4.11821e-05	0.0482651	-0.129097	0.180376	0.175074	0.172678	0.285966	0.298756	0.330698
cg26818573					2	46571343	F	1.9861e-05	0.0397111	-0.129847	0.448325	0.463788	0.469556	0.606412	0.572648	0.592148
cg18317439	FAM57A	NM_024792	Body		17	590387	R	2.46905e-05	0.0418278	-0.130823	0.255802	0.258308	0.23019	0.375071	0.366627	0.395071
cg12829455	DOCK3	NM_004947	Body		3	51366253	R	4.40961e-05	0.0495946	-0.131084	0.368772	0.379925	0.410184	0.504571	0.523571	0.523992
cg24536349	LY6K	NM_001160355	TSS200	N_Shore	8	143778342	R	2.07249e-05	0.0402651	-0.13172	0.432675	0.417506	0.414658	0.54958	0.573257	0.537162
cg17996401					7	47577760	R	2.84716e-05	0.0434938	-0.131742	0.381273	0.375273	0.348716	0.500275	0.486266	0.513946
cg24720038	C3orf27	NM_007354	3'UTR		3	129774228	F	1.1707e-05	0.0345873	-0.131845	0.558345	0.553547	0.542667	0.668842	0.679958	0.701296
cg04494136	CTBP2	NM_001329	Body		10	126693566	F	2.47359e-06	0.0274596	-0.132272	0.610835	0.59101	0.6133	0.738873	0.739501	0.733587
cg00762678	CBFA2T3	NM_175931	5'UTR	N_Shelf	16	87530736	R	1.48007e-05	0.0367541	-0.132832	0.108037	0.104648	0.0949181	0.215447	0.23932	0.251333
cg04372674	AQP1	NM_198098	TSS200		7	30917906	R	2.86263e-05	0.0434938	-0.133037	0.358713	0.33878	0.349999	0.470869	0.470309	0.505425
cg02355868	CBFA2T3	NM_005187	Body	S_Shore	16	87562298	F	5.90725e-06	0.031089	-0.133075	0.627967	0.624273	0.622311	0.775282	0.744985	0.75351
cg19839325	KLHL26	NM_018316	Body	N_Shore	19	18622132	R	3.09265e-05	0.043587	-0.133653	0.317902	0.326145	0.288253	0.433062	0.455815	0.444382
cg02695343	LAG3	NM_002286	TSS200	N_Shore	12	6751856	R	2.1914e-05	0.0408023	-0.134752	0.591382	0.612618	0.633978	0.744129	0.747174	0.75093
cg17339794	KDM4B	NM_015015	Body	N_Shore	19	5025224	F	2.95837e-05	0.0434938	-0.134895	0.457874	0.458423	0.488532	0.591651	0.59793	0.619933
cg14843030	LCK	NM_005356	TSS1500	S_Shore	1	32488638	R	9.53183e-06	0.0320148	-0.135708	0.428002	0.42123	0.407921	0.537436	0.564585	0.562255
cg08638320	FOXD2	NM_004474	TSS1500	Island	1	47672852	R	1.07007e-06	0.0229386	-0.136412	0.31794	0.302607	0.300656	0.439107	0.44345	0.447883
cg06268875	FAM38B	NM_022068	Body	N_Shore	18	11137385	R	2.38664e-05	0.0413606	-0.137238	0.304815	0.31342	0.287361	0.439242	0.420945	0.457124
cg15381475	RAC1	NM_018890	Body		7	6402626	F	9.3488e-06	0.0320148	-0.138152	0.0867622	0.0638075	0.0771198	0.220008	0.197513	0.224625
cg11859594	CYTH1	NM_017456	Body		17	74267340	R	2.95102e-06	0.0292071	-0.13834	0.285967	0.282892	0.286546	0.43588	0.408238	0.426307
cg13383814	C10orf12	NM_015652	1stExon		10	98735002	F	1.45202e-05	0.0367541	-0.138655	0.162682	0.152672	0.125626	0.293739	0.280038	0.283169
cg21179618	NOTCH1	NM_017617	Body	N_Shore	9	138544463	F	7.66996e-06	0.031089	-0.138764	0.174831	0.152142	0.157996	0.303988	0.28561	0.311664
cg09012264	2006-09-01	NM_015129	TSS1500	Island	X	118712171	R	5.52824e-06	0.031089	-0.13974	0.230844	0.207263	0.228677	0.366134	0.350111	0.36976
cg02059317	CBFA2T3	NM_005187	Body		16	87552012	R	4.31547e-05	0.0492925	-0.140176	0.230508	0.241855	0.232038	0.399528	0.349162	0.376238
cg21964466					5	39562694	F	4.08558e-06	0.0308195	-0.140903	0.539268	0.526971	0.509192	0.661776	0.670561	0.665804
cg14233838				Island	9	138668246	F	2.41774e-05	0.0414471	-0.141489	0.242055	0.284077	0.258018	0.400158	0.394823	0.413635
cg22277972	ISCU	NM_213595	Body	S_Shelf	12	107484137	F	2.28942e-05	0.0413606	-0.14169	0.247434	0.210797	0.228841	0.355692	0.383597	0.372854
cg18263166					7	92371802	R	1.52338e-05	0.0367541	-0.14175	0.358903	0.364882	0.354703	0.478505	0.518707	0.506526
cg14535274	POLQ	NM_199420	Body		3	122633876	R	1.13611e-05	0.0343341	-0.141831	0.552093	0.54819	0.547406	0.696098	0.707871	0.669213
cg20764656	GPX2	NM_002083	TSS1500		14	64480232	F	1.89347e-05	0.0388398	-0.142034	0.539595	0.552722	0.515937	0.665105	0.689292	0.67996
cg08893839				Island	5	154007322	F	1.8409e-06	0.0261709	-0.142273	0.35981	0.344536	0.344623	0.489751	0.483506	0.502532
cg04437762	IL6R	NM_181359	Body	S_Shore	1	152646803	F	9.81569e-07	0.0229386	-0.14272	0.343077	0.352226	0.349084	0.485061	0.485094	0.502393
cg00860090	ITPKB	NM_002221	Body	S_Shelf	1	224898623	F	3.41105e-05	0.0445517	-0.143245	0.391144	0.386515	0.383192	0.501662	0.540331	0.548593
cg13957126				S_Shore	7	5564375	R	1.6754e-05	0.0374733	-0.143616	0.536574	0.510387	0.53802	0.654146	0.678624	0.683059
cg10734665	ATP10A	NM_024490	Body	N_Shore	15	23658503	R	5.0347e-07	0.0204	-0.144802	0.188035	0.18536	0.178427	0.321016	0.336279	0.328933
cg08384999	BCOR	NM_001123384	5'UTR	Island	X	39889290	R	2.32351e-05	0.0413606	-0.144984	0.74033	0.720593	0.761295	0.892397	0.871483	0.893289
cg13948857	C5orf56	NM_001013717	Body		5	131791655	F	2.76669e-06	0.0280849	-0.145414	0.652593	0.630318	0.639807	0.780201	0.78092	0.797841
cg11686792	RASA3	NM_007368	Body	N_Shore	13	113894163	R	7.69584e-06	0.031089	-0.146333	0.176727	0.187067	0.20039	0.323963	0.327683	0.351536
cg04276058	IFFO2	NM_001136265	Body		1	19126618	R	2.40775e-06	0.0274596	-0.14662	0.320705	0.329296	0.314525	0.459826	0.46188	0.482679
cg19429405	C10orf105	NM_001168390	TSS200		10	73167615	F	1.39746e-06	0.0251474	-0.147838	0.591695	0.594718	0.596611	0.728925	0.75418	0.743431
cg12710152	LCK	NM_005356	TSS200	S_Shelf	1	32489360	R	6.32982e-06	0.031089	-0.147851	0.395324	0.369954	0.392664	0.534634	0.545626	0.521236
cg05557991	CBFA2T3	NM_175931	5'UTR	N_Shelf	16	87531142	F	1.85097e-06	0.0261709	-0.148135	0.0634109	0.0810008	0.0632795	0.222362	0.223325	0.206409
cg14523574	CSF3R	NM_156038	TSS200		1	36721157	R	3.23619e-05	0.043587	-0.148628	0.337216	0.336821	0.304169	0.456254	0.47551	0.492324
cg10825839	ITGB2	NM_001127491	5'UTR		21	45156496	R	1.318e-05	0.0355465	-0.148842	0.144335	0.154031	0.15494	0.291916	0.284093	0.323822
cg22079077	DNAJC17	NM_018163	Body		15	38848676	F	3.03337e-05	0.0434938	-0.14885	0.460747	0.472822	0.464588	0.601509	0.599289	0.643907
cg23949574	HDAC4	NM_006037	5'UTR		2	239967792	F	8.38508e-06	0.0319006	-0.150063	0.160252	0.19072	0.185676	0.318484	0.34152	0.326832
cg04543273				N_Shore	5	176691019	R	1.10089e-06	0.0229386	-0.150133	0.350208	0.356673	0.358508	0.503869	0.494408	0.517513
cg15417249					6	114237966	R	3.27006e-05	0.0437362	-0.151521	0.439843	0.451479	0.404494	0.596009	0.578665	0.575706
cg12828729				N_Shore	5	134851868	R	9.64884e-07	0.0229386	-0.151863	0.621862	0.635669	0.616382	0.769415	0.776568	0.78352
cg18041642					17	59416297	R	6.93941e-06	0.031089	-0.151958	0.591571	0.614607	0.589104	0.756668	0.734768	0.759718
cg05638787	DNAJC17	NM_018163	Body		15	38849565	R	7.85823e-06	0.0314243	-0.157231	0.668662	0.639527	0.64677	0.82534	0.798226	0.803085
cg16849024	B3GNT8	NM_198540	5'UTR		19	46626050	F	2.59793e-05	0.0418278	-0.157336	0.311111	0.326761	0.327006	0.460791	0.468447	0.507646
cg18757155	ADAM28	NM_014265	TSS200		8	24207417	R	2.60931e-05	0.0418278	-0.157362	0.389906	0.364649	0.364741	0.535513	0.505907	0.54996
cg26052586	CABLES1	NM_001100619	Body	S_Shore	18	18971409	F	1.63858e-05	0.0372817	-0.158243	0.283647	0.26281	0.254652	0.447759	0.414119	0.41396
cg05148465					17	6974853	F	1.87065e-05	0.0388398	-0.158401	0.353336	0.341354	0.331874	0.474963	0.508041	0.518761
cg19711268	TRAF3	NM_145726	Body		14	102437611	R	6.84682e-06	0.031089	-0.159111	0.489258	0.464046	0.493177	0.641239	0.654579	0.627997
cg15691199	CEBPE	NM_001805	TSS1500		14	22659259	R	3.5631e-07	0.0204	-0.159292	0.148169	0.153178	0.135137	0.301759	0.304697	0.307904
cg24136700	RAI1	NM_030665	5'UTR	N_Shore	17	17636769	R	1.30106e-05	0.0355465	-0.159643	0.475897	0.447558	0.459423	0.624649	0.599992	0.637168
cg01924952					2	8545384	F	1.23501e-05	0.0354297	-0.16008	0.328008	0.330151	0.367259	0.508186	0.492791	0.504681
cg21012737	PLD4	NM_138790	5'UTR		14	104464216	F	9.10543e-06	0.0319006	-0.160229	0.183182	0.205728	0.216378	0.353342	0.354271	0.378364
cg13146674	LRP5	NM_002335	Body		11	67852199	R	1.34494e-05	0.0357349	-0.161199	0.198474	0.167939	0.203167	0.357507	0.334278	0.361391
cg07136133	PRR5L	NM_024841	5'UTR		11	36378953	F	3.57758e-05	0.0451126	-0.161387	0.559642	0.583565	0.586035	0.717539	0.729563	0.766302
cg18875357	PLD4	NM_138790	1stExon		14	104462308	F	1.49872e-05	0.0367541	-0.162164	0.209112	0.226771	0.22353	0.355518	0.393782	0.396608
cg15352829	PLD4	NM_138790	TSS200		14	104462063	R	4.26629e-05	0.0490324	-0.16269	0.399878	0.392107	0.355601	0.564261	0.545905	0.52549
cg13415795	SH2D7	NM_001101404	3'UTR		15	76183373	F	9.06717e-06	0.0319006	-0.164566	0.24085	0.245657	0.213161	0.38914	0.389632	0.414595
cg07126783	RPTOR	NM_001163034	Body	S_Shore	17	76415362	R	3.78035e-05	0.0456284	-0.164719	0.557848	0.532639	0.500011	0.689695	0.690006	0.704954
cg08091707	CFD	NM_001928	TSS200	N_Shore	19	810554	R	1.54064e-05	0.0367541	-0.164921	0.477735	0.509971	0.518042	0.656361	0.661618	0.682532
cg02978297	BCAR3	NM_003567	Body		1	93830175	R	3.57334e-06	0.0306227	-0.164949	0.378313	0.3502	0.368273	0.543981	0.527685	0.519966
cg07274406	ITGB2	NM_001127491	5'UTR		21	45158620	F	2.43552e-06	0.0274596	-0.166506	0.259619	0.276347	0.270152	0.417565	0.444782	0.443288
cg00822998	IQSEC2	NR_024449	TSS200		X	53327535	F	1.55516e-05	0.0367541	-0.166558	0.497791	0.479492	0.508131	0.656173	0.64371	0.685206
cg17346145	CBX2	NM_005189	Body	N_Shelf	17	75370142	F	1.5847e-05	0.0369041	-0.167155	0.18538	0.193316	0.180388	0.328694	0.378947	0.352908
cg17117981	TOP1MT	NM_052963	Body		8	144482347	R	1.93665e-05	0.0393182	-0.16721	0.732901	0.685811	0.695179	0.883363	0.86303	0.869128
cg12832726	LRP5	NM_002335	Body		11	67852741	F	1.49973e-06	0.0258144	-0.168858	0.221493	0.221301	0.234771	0.389215	0.410573	0.384351
cg23786209	ABLIM1	NM_001003408	Body		10	116275544	R	1.82015e-05	0.0387522	-0.168903	0.531275	0.571469	0.576302	0.716592	0.737755	0.73141
cg07483304	HOXA10	NM_153715	Body	N_Shore	7	27178266	F	1.72629e-05	0.0381801	-0.168991	0.218419	0.202499	0.220745	0.377998	0.360859	0.40978
cg09774932	WNT5B	NM_030775	TSS1500		12	1596049	F	1.54989e-05	0.0367541	-0.170077	0.34582	0.324557	0.313738	0.474818	0.514412	0.505117
cg07306253	DNAJC17	NM_018163	Body		15	38849516	F	5.66822e-07	0.0204	-0.171356	0.405142	0.40229	0.394654	0.55957	0.57414	0.582442
cg06130714	GAS7	NM_201433	Body		17	9965022	R	4.17124e-05	0.0482854	-0.171414	0.484349	0.526807	0.502428	0.6795	0.650168	0.698158
cg19687075	NOTCH1	NM_017617	Body	Island	9	138548205	R	2.23155e-05	0.0410182	-0.173758	0.267075	0.244434	0.226383	0.44353	0.407303	0.408333
cg19070894				N_Shore	5	134851787	F	1.83046e-05	0.0387522	-0.174903	0.479281	0.487564	0.50917	0.65895	0.648425	0.69335
cg24577594	GALNT2	NM_004481	Body		1	228307254	R	2.74322e-05	0.0431765	-0.175768	0.228738	0.220547	0.219496	0.377038	0.38592	0.433126
cg10588962	LOC404266	NR_033201	TSS1500	N_Shore	17	44022586	F	4.08475e-06	0.0308195	-0.176244	0.106087	0.134785	0.102054	0.278511	0.300209	0.292938
cg23216654	SAMD14	NM_174920	Body	S_Shore	17	45550106	F	1.66512e-05	0.037455	-0.177001	0.313604	0.267392	0.306941	0.474976	0.459525	0.484438
cg27477067	NAP1L4	NM_005969	3'UTR	S_Shore	11	2923386	F	2.976e-05	0.0434938	-0.177193	0.335793	0.337539	0.367613	0.523285	0.550326	0.498912
cg13424302					10	80186899	R	6.88501e-06	0.031089	-0.177834	0.432315	0.428557	0.395444	0.582963	0.605885	0.60097
cg06745511	CLNK	NM_052964	Body		4	10194872	R	1.46267e-05	0.0367541	-0.178201	0.362801	0.37959	0.343728	0.552535	0.516217	0.551972
cg10361005				N_Shelf	7	47585572	R	2.61781e-05	0.0418278	-0.178424	0.513649	0.531146	0.501134	0.664221	0.700238	0.71674
cg11166893	RASA3	NM_007368	Body	S_Shore	13	113832808	F	3.92044e-05	0.0464692	-0.180344	0.423536	0.402457	0.423084	0.626846	0.564116	0.599146
cg16162970	PACS2	NM_015197	TSS1500	N_Shore	14	104850997	R	1.16976e-05	0.0345873	-0.181117	0.607141	0.638851	0.620004	0.816402	0.778287	0.814657
cg13065206	DNAJC17	NM_018163	Body		15	38849309	F	1.01858e-05	0.0327842	-0.181904	0.207464	0.179161	0.200848	0.353928	0.396122	0.383132
cg27262415	PTPRCAP	NM_005608	TSS200	S_Shore	11	66961742	R	4.06116e-06	0.0308195	-0.182824	0.16581	0.148869	0.156797	0.330342	0.326408	0.363198
cg27574991	TNS3	NM_022748	5'UTR		7	47503529	R	2.70462e-06	0.0280849	-0.183765	0.380845	0.381488	0.369103	0.541716	0.561266	0.579749
cg15382933	CD59	NM_203330	5'UTR		11	33701975	F	1.09857e-05	0.03396	-0.187887	0.373814	0.386531	0.344588	0.543243	0.549561	0.575789
cg23045908	PDE4B	NM_001037341	Body		1	66572007	R	1.69428e-05	0.0376827	-0.188953	0.390594	0.41866	0.370609	0.589422	0.561648	0.595652
cg01332882	ZNFX1	NM_021035	Body		20	47307562	R	2.33999e-06	0.0274596	-0.189422	0.474567	0.466929	0.440057	0.653096	0.657299	0.639424
cg10140454	RAI1	NM_030665	5'UTR	Island	17	17566744	F	1.14762e-05	0.0344193	-0.190868	0.353892	0.367617	0.346483	0.518161	0.55296	0.569474
cg18245281	CTSZ	NM_001336	TSS1500	S_Shore	20	57016471	R	3.28669e-05	0.0438106	-0.192728	0.261682	0.287087	0.268216	0.435804	0.459498	0.499866
cg01774027	ARID3A	NM_005224	Body	Island	19	898712	F	3.46621e-07	0.0204	-0.192736	0.556976	0.535019	0.5372	0.729258	0.737348	0.740799
cg27435133	CBFA2T3	NM_005187	Body	S_Shore	16	87562279	F	1.39385e-06	0.0251474	-0.192791	0.457055	0.439252	0.428978	0.647846	0.624153	0.631659
cg03660710	TRABD	NM_025204	5'UTR	N_Shore	22	48973206	R	1.77039e-05	0.0385101	-0.19374	0.21643	0.232356	0.231387	0.387263	0.445532	0.428599
cg10498921	PFDN1	NM_002622	3'UTR		5	139605242	R	2.31865e-06	0.0274596	-0.193854	0.214584	0.219999	0.214646	0.391219	0.40727	0.432301
cg04910877	CBFA2T3	NM_175931	5'UTR		16	87515736	F	2.82676e-07	0.0204	-0.194323	0.531478	0.515781	0.528602	0.717572	0.710919	0.73034
cg23851088	BCOR	NM_001123384	5'UTR	Island	X	39889376	F	3.37903e-05	0.0444696	-0.194869	0.319605	0.325216	0.327754	0.478786	0.533551	0.544843
cg23486701	SPTBN1	NM_178313	Body	S_Shelf	2	54642995	R	2.25701e-05	0.0411767	-0.195536	0.564613	0.51245	0.5142	0.711764	0.741177	0.724929
cg17969683	ADAM28	NM_014265	TSS200		8	24207459	R	2.4823e-05	0.0418278	-0.195958	0.417737	0.393612	0.375408	0.615133	0.563258	0.596239
cg09888840	SLC43A1	NM_003627	3'UTR	S_Shore	11	57008947	R	3.89174e-05	0.0464069	-0.196688	0.464156	0.43274	0.456039	0.617149	0.64299	0.682859
cg26269677	CRHBP	NM_001882	Body	S_Shore	5	76287444	R	2.49667e-05	0.0418278	-0.197567	0.560833	0.603348	0.567576	0.747272	0.780119	0.797065
cg01715901	CYTIP	NM_004288	Body		2	158005930	F	4.47979e-06	0.031089	-0.200156	0.49838	0.536728	0.517047	0.701693	0.73329	0.717639
cg08443038	CBFA2T3	NM_175931	5'UTR	Island	16	87534378	R	4.74827e-06	0.031089	-0.200341	0.261841	0.23901	0.228571	0.424194	0.461158	0.445093
cg04213390					2	85597445	F	7.10776e-07	0.0229386	-0.200729	0.417796	0.424197	0.401838	0.604784	0.612188	0.629045
cg13412834	FNBP1	NM_015033	3'UTR	S_Shore	9	131692591	R	9.57859e-06	0.0320148	-0.201088	0.305151	0.283927	0.295212	0.511497	0.511326	0.464731
cg07062336					12	44256349	F	5.05736e-07	0.0204	-0.201105	0.363675	0.344535	0.352461	0.541074	0.557477	0.565435
cg27531366	WDTC1	NM_015023	Body		1	27499645	F	2.80868e-05	0.0431765	-0.201565	0.435548	0.430272	0.386475	0.599938	0.612055	0.644998
cg04858148	PRDM8	NM_020226	5'UTR	N_Shore	4	81336040	R	2.35337e-05	0.0413606	-0.20221	0.282322	0.257556	0.228458	0.48292	0.449911	0.442136
cg14603031	LFNG	NM_001166355	Body	N_Shore	7	2529710	R	1.76514e-05	0.0385101	-0.203582	0.426457	0.405544	0.438454	0.610483	0.610765	0.659954
cg15820574				S_Shore	1	154673335	F	1.88651e-05	0.0388398	-0.203603	0.269994	0.271777	0.293023	0.448165	0.488695	0.508742
cg08854008	C1orf200	NR_027045	Body	S_Shore	1	9636984	R	8.80953e-06	0.0319006	-0.204218	0.23601	0.259646	0.2422	0.460679	0.420261	0.469571
cg10420527	LRP5	NM_002335	Body		11	67895081	F	7.37844e-06	0.031089	-0.204772	0.498773	0.472903	0.50364	0.67153	0.702133	0.715971
cg14227558	IKZF2	NM_016260	Body		2	213692096	F	1.44435e-07	0.0190602	-0.205489	0.432177	0.421371	0.41547	0.621301	0.626797	0.637386
cg02192117	TNRC18	NM_001080495	Body	Island	7	5425245	R	4.37898e-06	0.0309572	-0.206274	0.120486	0.124299	0.118829	0.314182	0.311434	0.356822
cg08545593	CTSZ	NM_001336	TSS1500	S_Shore	20	57016251	F	2.39246e-05	0.0413606	-0.209388	0.570595	0.609254	0.569591	0.761191	0.80123	0.815183
cg11268280				N_Shelf	8	142385254	R	7.9696e-06	0.031551	-0.209716	0.468071	0.511473	0.47709	0.676466	0.69636	0.712955
cg20487608	JARID2	NM_004973	Body		6	15396105	R	2.80582e-05	0.0431765	-0.20979	0.166398	0.159897	0.172199	0.335577	0.385111	0.407176
cg14649507	ITM2C	NM_001012516	Body		2	231443281	F	1.06285e-05	0.0336618	-0.210972	0.421359	0.432195	0.447848	0.615079	0.648128	0.671111
cg24484138	C20orf112	NM_080616	5'UTR	Island	20	30533851	R	1.75088e-06	0.0261709	-0.21098	0.21425	0.210382	0.21529	0.444932	0.401626	0.426304
cg21074766					15	96886600	F	3.11138e-05	0.043587	-0.21154	0.583564	0.579726	0.623886	0.781181	0.801501	0.839115
cg09316140	EPB49	NM_001114139	1stExon	N_Shore	8	21968420	F	1.12122e-05	0.0341446	-0.211998	0.207891	0.213464	0.192426	0.383301	0.426085	0.44039
cg10542975	PTPRCAP	NM_005608	5'UTR	S_Shore	11	66961672	F	1.65192e-05	0.0373703	-0.212772	0.125802	0.0904051	0.10554	0.335276	0.286351	0.338434
cg00610577	ETV6	NM_001987	Body		12	11899933	R	6.76499e-06	0.031089	-0.217707	0.333102	0.30248	0.285362	0.540003	0.506314	0.527749
cg22184990	ARHGAP26	NM_015071	Body		5	142362381	F	5.31416e-07	0.0204	-0.218752	0.29249	0.301733	0.315805	0.507466	0.533598	0.525221
cg19743891	UBXN11	NM_145345	1stExon		1	26517160	F	3.65648e-05	0.0451126	-0.220792	0.229387	0.170986	0.170363	0.386303	0.413789	0.433018
cg11093142	RCBTB2	NM_001268	Body		13	47973017	F	8.97779e-07	0.0229386	-0.22325	0.278995	0.260482	0.239147	0.479504	0.481183	0.487688
cg20281375				S_Shelf	19	13807770	R	2.08058e-05	0.0402651	-0.225108	0.170856	0.161639	0.167902	0.368608	0.371812	0.4353
cg19095568	DNAJC17	NM_018163	Body		15	38849405	F	2.75122e-06	0.0280849	-0.228494	0.493504	0.461935	0.455897	0.718283	0.69042	0.688115
cg05751148	PTPRCAP	NM_005608	Body	S_Shore	11	66961375	F	8.27612e-06	0.0319006	-0.230196	0.198114	0.156616	0.18429	0.423074	0.381109	0.425427
cg12401842	CLEC4A	NM_194448	TSS200		12	8167442	R	5.1756e-07	0.0204	-0.230907	0.243176	0.233134	0.206987	0.462191	0.457379	0.456447
cg02512860	CLDN15	NM_014343	1stExon		7	100667471	F	1.3431e-06	0.0251474	-0.233542	0.531814	0.524265	0.492441	0.759475	0.751045	0.738627
cg07948875	NME7	NM_013330	Body		1	167453628	F	4.89741e-06	0.031089	-0.23529	0.404918	0.374456	0.36873	0.615052	0.596345	0.642576
cg06378434	APBB1IP	NM_019043	5'UTR	S_Shore	10	26769185	F	9.60637e-06	0.0320148	-0.238504	0.361496	0.368115	0.34105	0.630828	0.586549	0.568797
cg25484252					3	72267089	F	3.106e-05	0.043587	-0.241457	0.317834	0.327312	0.343328	0.535113	0.560527	0.617206
cg24703661	CD79A	NM_001783	1stExon		19	47073098	R	1.57122e-06	0.025918	-0.243216	0.493004	0.487871	0.448158	0.720867	0.712969	0.724845
cg10500147	LAG3	NM_002286	TSS200	N_Shore	12	6751862	R	6.58248e-06	0.031089	-0.24487	0.387669	0.388704	0.439733	0.643972	0.63903	0.667713
cg12744859	LOC404266	NR_033204	TSS200	Island	17	44024491	R	2.11408e-05	0.0402651	-0.247324	0.176394	0.216116	0.165621	0.401189	0.466198	0.432716
cg12829360	CBFA2T3	NM_175931	5'UTR	Island	16	87533836	R	3.96409e-06	0.0308195	-0.254434	0.192633	0.217899	0.160707	0.429851	0.448171	0.456519
cg25662041	LMAN2	NM_006816	Body	Island	5	176691776	F	8.81681e-06	0.0319006	-0.255798	0.538918	0.507761	0.554113	0.821604	0.767265	0.779315
cg02852407	CD34	NM_001773	TSS1500	S_Shore	1	206152078	R	6.47674e-08	0.0128205	-0.258012	0.413639	0.434269	0.422515	0.682453	0.672205	0.689799
cg16545105	CRHBP	NM_001882	1stExon	N_Shore	5	76284505	R	3.50997e-05	0.0449676	-0.269038	0.380218	0.41537	0.441425	0.641168	0.682091	0.720868
cg21331324	CTSZ	NM_001336	TSS1500	S_Shore	20	57016395	F	1.28349e-05	0.0355331	-0.270602	0.265764	0.270644	0.302831	0.50767	0.569756	0.57362
cg21697512	CD34	NM_001025109	Body	N_Shelf	1	206148164	R	1.52922e-05	0.0367541	-0.271896	0.320001	0.25571	0.270597	0.536456	0.539353	0.586189
cg19872463	LAG3	NM_002286	TSS200	N_Shore	12	6751890	R	5.74999e-06	0.031089	-0.274291	0.378336	0.383928	0.417314	0.64801	0.652075	0.702365
cg13399952	FNBP1	NM_015033	Body	S_Shore	9	131692710	F	9.70411e-06	0.0320148	-0.275072	0.29316	0.325457	0.300259	0.566064	0.554437	0.623591
cg03543954	KIAA0513	NM_014732	Body		16	83673836	R	2.13761e-05	0.040491	-0.277217	0.368453	0.44651	0.405082	0.652833	0.7	0.698862
cg13408086	EXD3	NM_017820	Body	S_Shelf	9	139341218	F	7.62068e-06	0.031089	-0.326811	0.209817	0.232383	0.251052	0.511236	0.592302	0.570146
cg20071624	WIPI2	NM_016003	Body		7	5224883	R	2.35921e-05	0.0413606	-0.328392	0.381177	0.36282	0.447906	0.710132	0.699967	0.766982
cg05702747	CBFA2T3	NM_175931	5'UTR	Island	16	87533956	F	6.48997e-06	0.031089	-0.340745	0.23123	0.24699	0.195464	0.519899	0.586265	0.589753
cg08539872	UNC5B	NM_170744	Body		10	72674616	R	2.11551e-05	0.0402651	-0.349543	0.245995	0.346353	0.287343	0.655502	0.667264	0.605555
cg07584494	KDM4B	NM_015015	Body	Island	19	5025758	F	1.04926e-06	0.0229386	-0.367151	0.287082	0.32001	0.284754	0.635355	0.66061	0.697332
cg26810779	CBFA2T3	NM_175931	5'UTR	Island	16	87533868	F	1.04406e-08	0.00413337	-0.421166	0.125665	0.127369	0.110371	0.530573	0.558924	0.537407

## Sheet: (B) KD Tr.2 DNAm
8536 HYPERMETHYLATED CpGs upon knockdown of Tr.2
Target ID	UCSC Ref. Gene Name	UCSC Ref. Gene Accession	UCSC Ref. Gene Group	Relation to UCSC CpG Island	Chromosome 36	Coordinate 36	Strand	P-value	adj. P-value	ΔDNAm (Tr.2-scr.)	Tr.2_1	Tr.2_2	Tr.2_3	Scramble_1	Scramble_2	Scramble_3
cg25580656	ZFYVE21	NM_024071	Body	S_Shelf	14	103266913	R	6.47381e-06	0.0269557	0.345108	0.658055	0.710648	0.74828	0.367197	0.344376	0.370086
cg24697460	NCOR2	NM_006312	Body	N_Shelf	12	123474606	F	2.3696e-05	0.0269557	0.272919	0.835939	0.856415	0.870994	0.625902	0.580028	0.538663
cg18944752	RGS12	NM_198229	Body		4	3374170	R	0.000140875	0.0299384	0.270361	0.817284	0.754529	0.794581	0.578534	0.466919	0.509857
cg27366532	CREBBP	NM_001079846	Body		16	3783013	R	0.000109172	0.029118	0.26794	0.555222	0.647313	0.649976	0.317554	0.372959	0.358178
cg12063018	RIN3	NM_024832	Body		14	92079184	F	2.71788e-06	0.0269557	0.265335	0.692331	0.719759	0.726861	0.474384	0.42614	0.442422
cg04395462	FNBP1L	NM_017737	Body		1	93779454	F	0.000444786	0.0372962	0.264887	0.835281	0.832618	0.798596	0.637307	0.54799	0.486537
cg11660418	UXS1	NM_025076	Body		2	106128237	F	0.000559269	0.0395898	0.257577	0.75985	0.792751	0.766145	0.605037	0.47471	0.466268
cg07613391	TGFBR2	NM_001024847	Body		3	30683750	F	1.17245e-06	0.0269557	0.252919	0.569069	0.609443	0.597607	0.323801	0.347093	0.346468
cg16046667	C20orf117	NM_080627	Body	Island	20	34856112	R	0.000210434	0.032302	0.252457	0.61572	0.704136	0.722423	0.39946	0.424337	0.461111
cg00096307	UXS1	NM_025076	Body		2	106128186	F	0.000399244	0.0361387	0.251725	0.792556	0.827035	0.787376	0.619195	0.552933	0.479662
cg03382306					15	63885013	R	9.32718e-05	0.0284616	0.250906	0.593579	0.697494	0.671287	0.395448	0.396478	0.417716
cg07108443				S_Shelf	4	75187214	R	0.000616795	0.0407632	0.24697	0.656364	0.626792	0.56979	0.443894	0.323889	0.344252
cg17647904	NCOR2	NM_006312	Body	N_Shelf	12	123474554	F	3.03152e-06	0.0269557	0.244382	0.828299	0.856101	0.871809	0.628175	0.600976	0.593911
cg01138706	TNS1	NM_022648	5'UTR		2	218476825	R	1.14112e-05	0.0269557	0.239583	0.55841	0.604287	0.603267	0.374329	0.325492	0.347394
cg23384708	TNF	NM_000594	Body	N_Shelf	6	31652913	F	1.10328e-05	0.0269557	0.239032	0.780262	0.79196	0.787784	0.570885	0.507344	0.56468
cg15160524	TNS1	NM_022648	5'UTR		2	218479671	R	0.000169643	0.0308336	0.236589	0.784817	0.75078	0.768486	0.594084	0.486914	0.513317
cg02173977	C14orf45	NM_025057	3'UTR		14	73602113	R	0.00043168	0.0369637	0.235939	0.691261	0.736258	0.734181	0.543594	0.494704	0.415584
cg04928457	SORBS2	NM_021069	5'UTR		4	187072860	R	0.00106504	0.0490729	0.235578	0.636085	0.778253	0.684777	0.474054	0.420239	0.498087
cg15282973	SCARB1	NM_001082959	Body	N_Shore	12	123912206	F	0.00104223	0.0486197	0.233528	0.662071	0.744882	0.805081	0.461857	0.512277	0.537316
cg19838043	ZFYVE21	NM_024071	Body	S_Shore	14	103265791	R	5.26838e-05	0.0269557	0.232573	0.870212	0.876042	0.879656	0.685228	0.648911	0.594051
cg03654391	UBAC2	NM_001144072	3'UTR		13	98835619	R	8.20322e-05	0.027781	0.232358	0.784899	0.816191	0.858552	0.619854	0.590189	0.552525
cg09766355	NPL	NM_030769	TSS1500	S_Shore	1	181027481	R	2.43074e-05	0.0269557	0.231435	0.605576	0.676854	0.666105	0.427121	0.406927	0.420181
cg26861995	RUVBL1	NM_003707	Body		3	129314363	R	1.97603e-05	0.0269557	0.230244	0.691147	0.731457	0.672104	0.486354	0.475464	0.442159
cg17280129	NHS	NM_001136024	Body	S_Shelf	X	17588282	F	0.000221677	0.0325755	0.230202	0.710856	0.800209	0.821253	0.54021	0.541362	0.560142
cg18857467	HDAC1	NM_004964	Body		1	32560076	F	3.74799e-06	0.0269557	0.229349	0.71361	0.762714	0.749251	0.513602	0.500969	0.522958
cg00686915	ZNF789	NM_001013258	Body		7	98914540	R	0.000948866	0.0469503	0.224573	0.485594	0.59077	0.601576	0.28579	0.357387	0.361043
cg19636224	ST3GAL3	NM_174965	5'UTR	S_Shelf	1	43949431	R	0.000274171	0.0334418	0.222484	0.469051	0.568131	0.473381	0.290147	0.296471	0.256495
cg15965716	PBX1	NM_002585	Body		1	162954939	R	0.000181809	0.0313021	0.222386	0.590803	0.684251	0.652987	0.39058	0.447561	0.422743
cg00324592	FNTA	NM_001018677	Body	S_Shelf	8	43033698	F	0.00102179	0.0483009	0.222221	0.509368	0.6419	0.571491	0.380466	0.307029	0.3686
cg06840243	UBE2O	NM_022066	Body		17	71953933	F	0.000276293	0.0334422	0.222173	0.733527	0.79711	0.796353	0.602039	0.551534	0.506899
cg14398113					15	45892419	F	4.08521e-05	0.0269557	0.22149	0.504023	0.58365	0.543287	0.334523	0.30895	0.323017
cg16553083					1	222764703	R	9.3673e-07	0.0269557	0.22098	0.899133	0.919815	0.923167	0.684078	0.684418	0.710679
cg09335715	STYXL1	NM_016086	Body	S_Shelf	7	75464796	R	0.0008074	0.0445621	0.22014	0.493636	0.605198	0.487387	0.312364	0.337047	0.276391
cg17250929	S100A5	NM_002962	Body		1	151780434	F	5.97672e-05	0.0269557	0.217997	0.498601	0.568108	0.49139	0.291289	0.315278	0.297542
cg08999812	TBCD	NM_005993	Body	S_Shore	17	78334239	R	1.13521e-06	0.0269557	0.217857	0.637493	0.668794	0.671084	0.450337	0.434035	0.439428
cg03925642					16	85897158	R	0.000178997	0.0311218	0.21658	0.649792	0.738498	0.700384	0.513496	0.470401	0.455036
cg02958515					15	37437587	F	0.00111738	0.049864	0.215924	0.42546	0.576092	0.520579	0.293328	0.287529	0.293502
cg09273716				S_Shelf	20	34928249	F	0.00102023	0.0483009	0.215397	0.51193	0.615449	0.592842	0.308855	0.354165	0.411009
cg14260083	RADIL	NM_018059	Body	S_Shore	7	4843384	F	0.00064972	0.0413736	0.214655	0.702659	0.725008	0.70364	0.566446	0.433171	0.487726
cg17453456	LMNA	NM_005572	Body		1	154361143	R	0.000122926	0.0291709	0.214087	0.709449	0.714514	0.741053	0.561238	0.484059	0.477459
cg16976870				N_Shore	8	144702667	R	6.05619e-05	0.0269557	0.212084	0.704732	0.696271	0.698622	0.531733	0.446267	0.485373
cg07632615	MED12L	NM_053002	Body		3	152302277	R	0.000236672	0.0327587	0.210602	0.363686	0.391248	0.456606	0.179698	0.175025	0.225012
cg19586199	PRKACA	NM_207518	TSS200	N_Shelf	19	14086172	F	0.000184789	0.0313812	0.210399	0.698509	0.696334	0.672119	0.535419	0.438924	0.461422
cg23750151	PSMB8	NM_004159	3'UTR	S_Shore	6	32916482	R	3.21193e-05	0.0269557	0.209933	0.563412	0.552632	0.613492	0.370266	0.345692	0.38378
cg22575127	MGMT	NM_002412	Body		10	131220729	R	2.44645e-06	0.0269557	0.208776	0.820339	0.841403	0.851609	0.644761	0.612117	0.630145
cg13261938	MRM1	NM_024864	TSS1500	N_Shore	17	32030855	R	0.000121601	0.0291649	0.208131	0.625235	0.705421	0.70587	0.456419	0.477456	0.478259
cg18261944	ZCCHC24	NM_153367	Body	N_Shelf	10	80870997	R	1.1633e-05	0.0269557	0.206881	0.704256	0.705626	0.726943	0.534104	0.478321	0.503757
cg08622666	RANBP9	NM_005493	Body		6	13803722	F	4.00593e-05	0.0269557	0.206148	0.760119	0.812581	0.771405	0.604389	0.570205	0.551068
cg24990317	NCOR2	NM_006312	Body	N_Shelf	12	123474570	F	4.79568e-05	0.0269557	0.205995	0.797601	0.806667	0.808195	0.643701	0.573008	0.577771
cg04468402	ZNF362	NM_152493	Body	N_Shore	1	33513563	R	2.97177e-05	0.0269557	0.20536	0.862578	0.845414	0.861798	0.691482	0.627349	0.634881
cg03707169	FLI1	NM_002017	Body		11	128152261	R	0.000107604	0.0291071	0.204566	0.846912	0.829238	0.859182	0.6904	0.621661	0.609575
cg09181054	IFFO2	NM_001136265	3'UTR	S_Shelf	1	19105513	R	0.000692147	0.0422032	0.204407	0.573513	0.648217	0.662893	0.41599	0.38334	0.472071
cg08703857	IQCE	NM_152558	3'UTR		7	2620177	F	0.000310367	0.0342577	0.204236	0.614364	0.643378	0.640137	0.489734	0.388354	0.407081
cg00811377	DHX16	NM_001164239	Body	N_Shelf	6	30744587	R	0.000127165	0.0292137	0.204207	0.646932	0.704165	0.726371	0.514506	0.467352	0.482989
cg24592546	TRIM15	NM_033229	Body	N_Shelf	6	30244769	F	7.79324e-05	0.0275965	0.204203	0.70861	0.753314	0.79464	0.546444	0.543796	0.553716
cg22579224	KIAA1199	NM_018689	3'UTR		15	79030200	F	1.39943e-06	0.0269557	0.204198	0.596225	0.600117	0.596411	0.412795	0.373423	0.393941
cg12149606	TMED10	NM_006827	Body		14	74683939	F	3.54447e-05	0.0269557	0.204167	0.690855	0.631899	0.656598	0.464379	0.429742	0.47273
cg23580509				N_Shelf	11	94459898	F	0.000841505	0.0452337	0.203874	0.616501	0.707244	0.742622	0.467154	0.481169	0.506422
cg03042633	SKI	NM_003036	Body		1	2173225	F	0.000386706	0.0360479	0.203835	0.689138	0.770227	0.77353	0.501805	0.56427	0.555317
cg02814691	NPL	NM_030769	TSS1500	S_Shore	1	181027523	F	0.000915394	0.0463538	0.203816	0.467235	0.581433	0.590849	0.335792	0.343025	0.349252
cg05847038	ADAM7	NM_003817	Body		8	24354716	F	0.000587292	0.0401302	0.203425	0.631771	0.748343	0.714012	0.512315	0.49928	0.472257
cg05450477	E2F3	NM_001949	Body		6	20534824	R	4.48034e-06	0.0269557	0.202954	0.804379	0.844418	0.816554	0.602458	0.627513	0.626517
cg19609644					8	125282629	R	0.000872721	0.0455971	0.202562	0.529663	0.661859	0.60106	0.3769	0.400818	0.407177
cg16821385	AMBRA1	NM_017749	Body		11	46423808	R	9.80611e-05	0.0285919	0.200753	0.743986	0.82899	0.796674	0.596869	0.594706	0.575819
cg27186519					11	46688952	F	6.00655e-05	0.0269557	0.199682	0.847577	0.835046	0.871738	0.689598	0.6186	0.647118
cg04128065	TAF5L	NM_014409	Body	S_Shelf	1	227799928	F	0.000170773	0.0308336	0.199516	0.867942	0.848866	0.874542	0.718138	0.630351	0.644313
cg21531389	CRYBB1	NM_001887	Body		22	25336498	R	0.000392857	0.0361097	0.19832	0.635226	0.624365	0.631899	0.496148	0.412736	0.387646
cg22328837	RUNX2	NM_001015051	Body		6	45530098	F	0.000571542	0.0398783	0.198037	0.449593	0.477631	0.52513	0.239449	0.335151	0.283642
cg16760485	C14orf73	NM_001077594	TSS1500	N_Shelf	14	102635620	R	0.000215717	0.0323527	0.197453	0.618034	0.553877	0.547892	0.348059	0.411589	0.367796
cg24544298	DHX16	NM_001164239	Body	N_Shelf	6	30744581	R	0.000160382	0.0307112	0.196485	0.637274	0.671936	0.690984	0.485694	0.425742	0.499303
cg07220903	CCDC12	NM_144716	Body		3	46948288	F	0.000895471	0.0459515	0.195206	0.500536	0.605245	0.619923	0.371676	0.377222	0.391188
cg18194655	PXK	NM_017771	Body		3	58375145	R	0.000303219	0.0340405	0.194486	0.698652	0.72745	0.683245	0.56227	0.494957	0.468663
cg00934037	CDC14A	NM_003672	Body		1	100662260	F	0.000183886	0.0313654	0.194344	0.377127	0.470697	0.430746	0.218393	0.238454	0.238689
cg00587342	PMM1	NM_002676	Body	N_Shore	22	40313744	R	0.00105098	0.0487409	0.194287	0.464265	0.558948	0.593333	0.354808	0.333801	0.345077
cg04388278	PRKAR2B	NM_002736	Body		7	106517722	F	0.000451546	0.0374074	0.194021	0.682674	0.782281	0.756953	0.567216	0.553249	0.51938
cg02610274					16	83993254	F	1.89389e-05	0.0269557	0.193962	0.725988	0.752434	0.721195	0.562504	0.544839	0.510387
cg26508444	FAM53B	NM_014661	Body		10	126320835	R	5.66679e-05	0.0269557	0.193426	0.798508	0.858995	0.849101	0.635711	0.625255	0.665359
cg10560561	CLASP1	NM_001142273	Body		2	121903769	R	0.000844273	0.0452635	0.193173	0.633842	0.733021	0.71815	0.46278	0.509259	0.533455
cg14898223				S_Shore	2	190155652	F	0.000494293	0.0381018	0.192642	0.663384	0.76244	0.726117	0.557553	0.502746	0.513716
cg24629111	FNIP1	NM_133372	Body		5	131120015	F	3.23086e-06	0.0269557	0.192551	0.586562	0.615293	0.601316	0.408672	0.391803	0.425044
cg13237068	CENPJ	NM_018451	Body		13	24383381	R	0.00075419	0.0435754	0.192513	0.648406	0.658072	0.658156	0.533629	0.436919	0.416548
cg17180284	B3GALTL	NM_194318	Body		13	30681983	F	0.000155301	0.0305139	0.191552	0.586707	0.655584	0.673894	0.448311	0.442669	0.45055
cg10576151				S_Shore	1	90002219	R	6.40196e-07	0.0269557	0.19133	0.823843	0.84654	0.848409	0.642296	0.646791	0.655715
cg13756273	TUBB1	NM_030773	5'UTR		20	57027908	F	0.000164635	0.0307314	0.190604	0.522261	0.56366	0.580835	0.39777	0.369615	0.327558
cg04023204	PLA2G15	NM_012320	Body	S_Shelf	16	66839480	F	0.00029494	0.0337983	0.189618	0.79281	0.796279	0.815989	0.644792	0.554458	0.636974
cg20477259	TNF	NM_000594	Body	N_Shelf	6	31652939	F	1.78089e-05	0.0269557	0.188401	0.832122	0.83874	0.848856	0.67164	0.618459	0.664415
cg00503447				N_Shelf	6	26288907	F	0.000797345	0.0444408	0.187824	0.406644	0.526607	0.478203	0.272221	0.298286	0.277475
cg15819955	XCL2	NM_003175	Body		1	166776989	F	0.000901093	0.0460857	0.186973	0.882302	0.803258	0.81376	0.693652	0.64353	0.601217
cg16286925	FER	NM_005246	Body		5	108367863	R	6.55339e-05	0.0269557	0.18638	0.771302	0.816797	0.809283	0.635969	0.622381	0.579892
cg15963913	ZFYVE21	NM_024071	Body	S_Shore	14	103265756	F	0.000110005	0.029118	0.186211	0.87044	0.889077	0.882491	0.739265	0.684968	0.659144
cg18470038	ANO6	NM_001025356	3'UTR		12	44110772	R	0.00080407	0.0445194	0.186138	0.57433	0.676061	0.651024	0.414977	0.45122	0.476803
cg26204079	DGKD	NM_152879	TSS1500		2	233927087	F	0.000236122	0.0327587	0.186014	0.542495	0.625143	0.626301	0.405118	0.417647	0.413131
cg17675088	FAM172A	NR_028080	Body		5	93038980	R	0.000291978	0.0337564	0.185757	0.670751	0.665015	0.653118	0.528968	0.472536	0.430107
cg09076077	C20orf197	NM_173644	TSS1500		20	58063710	F	1.64853e-06	0.0269557	0.184923	0.763764	0.78998	0.792288	0.602044	0.602303	0.586917
cg14712058	SIN3B	NM_015260	Body	N_Shore	19	16849083	R	0.000126947	0.0292137	0.184766	0.658441	0.657898	0.682254	0.526106	0.44728	0.470907
cg01059818	NLK	NM_016231	Body	S_Shore	17	23394817	F	1.02599e-05	0.0269557	0.184564	0.764527	0.797212	0.795706	0.607262	0.616365	0.580127
cg00986350	ZFPM1	NM_153813	Body	Island	16	87067897	R	1.61113e-05	0.0269557	0.18442	0.824447	0.846763	0.873783	0.653243	0.657713	0.680777
cg26120787	PDE11A	NM_001077358	Body		2	178225016	R	0.000754639	0.0435816	0.184346	0.672987	0.630949	0.693302	0.531542	0.42963	0.48303
cg09646173	PDE6A	NM_000440	Body		5	149297862	F	6.77372e-05	0.0269557	0.184167	0.536294	0.574041	0.598388	0.39941	0.36091	0.395901
cg19378416	C17orf101	NM_175902	Body	N_Shore	17	77966064	F	4.48326e-06	0.0269557	0.184011	0.347506	0.33593	0.339682	0.133747	0.161297	0.176042
cg15777769	AMPH	NM_139316	3'UTR		7	38390174	R	0.000559797	0.0395958	0.183885	0.686609	0.7721	0.728384	0.508027	0.582031	0.545381
cg06517521	KDM1A	NM_015013	Body		1	23236544	F	0.000188879	0.0313922	0.183562	0.757493	0.827807	0.782381	0.573705	0.629515	0.613773
cg10835986	HECW1	NM_015052	Body		7	43543886	R	0.000376725	0.03585	0.183245	0.806738	0.800269	0.779164	0.664967	0.606305	0.565165
cg15675198	VAMP4	NM_003762	Body		1	169952641	R	0.000457278	0.0374074	0.182087	0.634551	0.693286	0.733606	0.517565	0.481542	0.516076
cg24334438				N_Shore	X	13305353	R	0.000159335	0.0306957	0.181565	0.632223	0.694664	0.704822	0.509715	0.473492	0.503807
cg09918091					10	99530164	F	0.000212887	0.0323527	0.179681	0.727487	0.804992	0.79355	0.57618	0.597259	0.613548
cg21766191	CIT	NM_007174	3'UTR	N_Shelf	12	118609891	R	0.000113001	0.029118	0.179568	0.819165	0.830004	0.822728	0.690381	0.62709	0.615722
cg16589887					2	18560596	F	7.71689e-05	0.0275127	0.179176	0.38616	0.458163	0.424308	0.251027	0.231011	0.249065
cg25436152	ABR	NM_021962	Body	S_Shelf	17	901240	R	0.000285819	0.0336218	0.178794	0.861923	0.839182	0.903741	0.708522	0.648603	0.711338
cg00344445	FLI1	NM_002017	Body		11	128152317	R	0.000431908	0.0369637	0.178622	0.926663	0.915263	0.912494	0.798957	0.713946	0.705652
cg21972063	DNAH8	NM_001371	Body		6	39029661	F	0.000890607	0.0458762	0.177107	0.548315	0.652248	0.642782	0.437242	0.453082	0.421702
cg04161236	HBBP1	NR_001589	Body		11	5220008	R	4.37194e-05	0.0269557	0.176722	0.845767	0.873318	0.852119	0.646635	0.690223	0.704181
cg06856840	FAH	NM_000137	Body		15	78233506	F	7.53761e-05	0.0272397	0.175986	0.667246	0.634205	0.690525	0.506729	0.495676	0.461614
cg07918509	ICAM2	NM_001099786	Body		17	59437139	R	3.33342e-05	0.0269557	0.175707	0.69775	0.699811	0.693955	0.55477	0.516903	0.492722
cg26205859	PION	NM_017439	Body		7	76805796	R	0.000714802	0.0426568	0.175275	0.417836	0.448226	0.477074	0.261812	0.230591	0.324908
cg19876649	MYOM1	NM_019856	TSS200		18	3210273	F	0.000387661	0.0360479	0.174993	0.502182	0.553004	0.577932	0.397681	0.334926	0.375533
cg18582010	ASAP1	NM_018482	TSS1500		8	131484558	R	0.000520351	0.0388269	0.174911	0.64421	0.698977	0.714997	0.467965	0.537881	0.527603
cg00464796	WDR72	NM_182758	Body		15	51639906	F	0.00058093	0.0400254	0.174819	0.676838	0.756677	0.767387	0.566474	0.575732	0.534239
cg07249939	ZBTB12	NM_181842	Body	N_Shore	6	31975974	R	0.000223095	0.0326109	0.174781	0.832977	0.841123	0.872647	0.713601	0.6341	0.674704
cg12298697				S_Shelf	6	32958403	F	0.000497537	0.0381727	0.174276	0.494453	0.498759	0.544459	0.380415	0.292025	0.342404
cg13908365	EFHC2	NM_025184	Body	N_Shelf	X	44085104	R	0.000718308	0.0427262	0.173976	0.707587	0.739294	0.712705	0.602854	0.537895	0.496909
cg07401516					5	95596863	F	0.000232924	0.0327587	0.173467	0.491285	0.56061	0.517616	0.378317	0.348892	0.3219
cg26047334	TNS1	NM_022648	5'UTR		2	218494154	R	8.70977e-05	0.0279201	0.173016	0.614477	0.675862	0.675964	0.494897	0.473977	0.478379
cg10587989	ITGB1BP2	NM_012278	TSS200		X	70438250	F	0.00106423	0.0490561	0.172897	0.665556	0.760886	0.749017	0.560255	0.51863	0.577883
cg00834899	GP5	NM_004488	TSS1500	S_Shelf	3	195602409	R	0.000699428	0.042342	0.171657	0.672656	0.735276	0.677224	0.539107	0.555818	0.475258
cg01951477	TG	NM_003235	Body		8	134185936	F	3.56066e-06	0.0269557	0.171224	0.788551	0.811182	0.814574	0.648932	0.626556	0.625149
cg12589839	PIK3C3	NM_002647	Body		18	37829940	R	6.93218e-05	0.0269557	0.171082	0.761796	0.802444	0.736187	0.604796	0.583693	0.598692
cg06519422	GABBR1	NM_021904	Body	N_Shore	6	29707205	R	9.15924e-06	0.0269557	0.171027	0.670866	0.662425	0.689784	0.494361	0.490441	0.525192
cg27286011	INF2	NM_022489	5'UTR	N_Shore	14	104238619	R	2.68724e-05	0.0269557	0.170771	0.743733	0.775068	0.764161	0.618019	0.580783	0.571847
cg24500487	PAPSS2	NM_004670	Body	S_Shore	10	89410774	F	0.000140165	0.0299025	0.170349	0.462587	0.476674	0.489534	0.324594	0.262545	0.330609
cg25299364	PROKR1	NM_138964	Body	N_Shore	2	68735648	F	0.000170239	0.0308336	0.170218	0.660157	0.724921	0.698287	0.553957	0.508801	0.509954
cg18401778	TMEM108	NM_001136469	5'UTR		3	134325348	R	0.00103126	0.0484539	0.170166	0.462203	0.571838	0.494259	0.35883	0.329367	0.329607
cg22365313	PAPSS1	NM_005443	Body		4	108855769	R	0.000125638	0.0292042	0.17014	0.728575	0.776785	0.785359	0.620711	0.57374	0.585848
cg25581222	CSNK1G1	NM_022048	Body		15	62326292	R	0.000525685	0.0388725	0.169931	0.631612	0.710438	0.662658	0.535362	0.473118	0.486437
cg11390960	MAOA	NM_000240	Body	S_Shore	X	43401973	F	0.000607068	0.0405764	0.169856	0.73173	0.822881	0.804108	0.614135	0.639444	0.595573
cg23599820	KIAA0195	NM_014738	5'UTR	S_Shelf	17	70967794	F	2.01793e-05	0.0269557	0.169844	0.73077	0.726087	0.740357	0.553847	0.541554	0.59228
cg16186435	PSMB8	NM_004159	Body	N_Shore	6	32918811	F	0.000676989	0.0419352	0.169829	0.756376	0.831664	0.834924	0.672866	0.615108	0.625502
cg14012059	LRSAM1	NM_001005373	Body		9	129262790	R	0.000111514	0.029118	0.169016	0.674299	0.68992	0.733713	0.555966	0.517688	0.517229
cg08197287	AFF1	NM_001166693	Body		4	88171197	R	5.09694e-05	0.0269557	0.168664	0.725201	0.750821	0.687407	0.548514	0.560289	0.548634
cg13730841	GUCY1B3	NM_000857	TSS1500	N_Shore	4	156898987	F	7.29199e-05	0.0269799	0.168604	0.800209	0.785511	0.768331	0.650565	0.590283	0.607391
cg26090940	SLC16A7	NM_004731	Body		12	58416721	R	0.000118938	0.0291557	0.168455	0.476619	0.519529	0.471026	0.347692	0.321692	0.292426
cg04759112	CMIP	NM_030629	Body		16	80220893	R	0.000820089	0.0448139	0.168271	0.74649	0.754051	0.780124	0.650288	0.547665	0.5779
cg18681028					4	6805978	F	0.000390887	0.036058	0.168232	0.832902	0.794074	0.796129	0.688874	0.612271	0.617264
cg19889855	PARP15	NM_152615	TSS200		3	123817020	F	0.000104018	0.0290064	0.168095	0.661464	0.686198	0.649034	0.521596	0.509786	0.46103
cg05591270	LOC283050	NR_024431	Body	N_Shore	10	80402615	F	0.000341519	0.0349208	0.166351	0.693948	0.728225	0.762667	0.541282	0.54685	0.597655
cg03325598	IQSEC1	NM_001134382	Body		3	12969877	F	0.000421228	0.0367802	0.166281	0.690894	0.749696	0.784281	0.564613	0.583822	0.577595
cg24112628	LRP11	NM_032832	Body		6	150215908	F	1.87419e-05	0.0269557	0.166259	0.762453	0.794475	0.781549	0.632305	0.616538	0.590857
cg02420480					7	41886417	F	0.000466375	0.037571	0.16621	0.727455	0.746461	0.747274	0.629049	0.552564	0.540948
cg01948850	VGLL4	NM_014667	Body		3	11626536	F	0.000229037	0.0327462	0.166106	0.887479	0.902627	0.870488	0.763259	0.684666	0.714351
cg19911116	STEAP3	NM_018234	Body	N_Shelf	2	119734885	R	0.000731283	0.0430564	0.166085	0.634916	0.716973	0.713272	0.544587	0.492266	0.530053
cg20749792					13	33083166	R	0.000453394	0.0374074	0.165752	0.704107	0.795178	0.737403	0.596914	0.577094	0.565425
cg08692903					16	83982054	R	0.00042861	0.036944	0.165552	0.627877	0.693668	0.716538	0.500153	0.512822	0.528451
cg14994947					1	101220723	R	0.000132213	0.0294435	0.165485	0.587008	0.641708	0.623844	0.463845	0.470422	0.421836
cg08799394	PDLIM1	NM_020992	Body	N_Shore	10	97039183	F	0.00015195	0.0304783	0.165269	0.583412	0.649488	0.652947	0.460734	0.467607	0.461699
cg09380688	C14orf73	NM_001077594	TSS200	N_Shelf	14	102636102	R	0.000330818	0.034671	0.165138	0.718299	0.68968	0.737542	0.587952	0.55179	0.510366
cg01794805	RARB	NM_016152	5'UTR		3	25468811	F	6.30756e-05	0.0269557	0.164965	0.797837	0.838466	0.862505	0.668467	0.673361	0.662087
cg05990080	CTDSPL	NM_005808	Body		3	37940822	F	0.000602602	0.0404967	0.164814	0.64551	0.724745	0.668809	0.550767	0.496498	0.497356
cg17835606	FBN1	NM_000138	Body		15	46627089	F	7.19741e-05	0.0269557	0.164452	0.67966	0.732009	0.741189	0.560126	0.546218	0.55316
cg04871472					2	70122417	R	6.53622e-05	0.0269557	0.164134	0.809007	0.81056	0.831321	0.673105	0.617393	0.667986
cg20242427	DAK	NM_015533	3'UTR		11	60872312	F	1.68499e-05	0.0269557	0.164093	0.804477	0.800479	0.796621	0.664977	0.617452	0.626868
cg00281664	ATP11A	NM_015205	Body	S_Shore	13	112432049	F	0.00021265	0.0323527	0.163857	0.766875	0.825114	0.818526	0.611807	0.642034	0.665103
cg26927427	KIFC3	NM_001130099	TSS1500	N_Shelf	16	56389731	F	0.000491055	0.0380813	0.163687	0.525497	0.620812	0.583365	0.405316	0.422977	0.41032
cg11783497	IL1RN	NM_000577	TSS200		2	113591763	F	0.000654041	0.0414369	0.163652	0.579113	0.664392	0.651434	0.441838	0.487868	0.474277
cg16886828	KDM4B	NM_015015	5'UTR	Island	19	4983663	F	2.12751e-05	0.0269557	0.163551	0.7506	0.788467	0.795569	0.620692	0.601914	0.621377
cg18801567	PDCD10	NM_145860	5'UTR	N_Shelf	3	168933057	R	5.54221e-05	0.0269557	0.163434	0.708961	0.76171	0.756403	0.563373	0.587588	0.585812
cg18210365	RBPMS2	NM_194272	Body	N_Shore	15	62853763	F	0.000254088	0.032974	0.16337	0.718028	0.744147	0.776812	0.57775	0.554658	0.616469
cg02688118				S_Shelf	13	113936558	R	0.000940792	0.0468026	0.163133	0.834687	0.765679	0.827956	0.692717	0.623147	0.623059
cg16503724	PLCL2	NM_015184	Body		3	17105671	F	1.97191e-07	0.0269557	0.162079	0.832138	0.827461	0.833742	0.676286	0.661561	0.669258
cg12105691	C3orf50	NR_021485	Body		3	169994117	R	6.51906e-05	0.0269557	0.161809	0.713872	0.764359	0.768086	0.59839	0.588591	0.573908
cg14837598	EPB49	NM_001114138	TSS200	S_Shelf	8	21972581	R	0.00106428	0.0490561	0.161711	0.573572	0.658025	0.5907	0.48501	0.429053	0.4231
cg07831553				N_Shelf	19	53488786	R	0.000329334	0.0346341	0.160969	0.71173	0.759719	0.784648	0.566418	0.591301	0.615472
cg07191657	MIR1265	NR_031668	TSS200		10	14518547	F	0.000321435	0.0344885	0.160866	0.483105	0.556227	0.522695	0.384842	0.335278	0.359311
cg13550410	KIAA0319L	NM_024874	Body		1	35777136	R	8.42521e-05	0.0278128	0.16023	0.701452	0.743902	0.743252	0.592888	0.569632	0.545396
cg26159832					14	102891964	F	0.00012945	0.0292181	0.159954	0.730894	0.756389	0.790624	0.607473	0.57501	0.615562
cg01201215	ATOX1	NM_004045	Body	N_Shore	5	151117623	F	0.000294847	0.0337983	0.159922	0.481843	0.560997	0.521073	0.381298	0.353092	0.349755
cg01360627	TNF	NM_000594	Body	N_Shelf	6	31652910	F	0.000911055	0.0462648	0.159856	0.949828	0.952544	0.95909	0.828355	0.732154	0.821387
cg09744397	TARSL2	NM_152334	TSS1500	S_Shore	15	100082816	R	0.000572343	0.0398845	0.159509	0.627031	0.683606	0.636359	0.515	0.508289	0.445181
cg16201146				N_Shore	20	19139526	R	0.000576979	0.0399549	0.159351	0.560887	0.594012	0.632088	0.475237	0.41614	0.417556
cg06804344	GP9	NM_000174	TSS1500		3	130261389	F	0.000737042	0.043159	0.159211	0.63064	0.618165	0.551327	0.473556	0.429247	0.419697
cg21261709	SRPK2	NM_182691	Body	S_Shore	7	104674278	F	0.000356943	0.035481	0.15916	0.644737	0.727716	0.71332	0.536582	0.54076	0.530952
cg25354657	APLP2	NR_024516	Body	N_Shelf	11	129496655	F	0.000179387	0.0311218	0.159087	0.703553	0.733079	0.754016	0.603154	0.544555	0.565676
cg15059548	TNS3	NM_022748	Body		7	47311159	F	0.00069792	0.0423113	0.158949	0.493509	0.592911	0.547181	0.381832	0.377779	0.397142
cg17950348	DNAJB6	NM_058246	Body		7	156876227	F	0.000562848	0.0396783	0.158751	0.298608	0.390706	0.371681	0.194641	0.194335	0.195766
cg13159985	LOC646982	NR_024506	Body		13	39951224	R	0.000506644	0.0384984	0.15863	0.78351	0.814638	0.812644	0.69546	0.612665	0.626777
cg15403758					4	166647601	F	0.000154358	0.0305139	0.1584	0.815417	0.881877	0.87235	0.707596	0.685299	0.701549
cg16826055					7	41053732	F	0.000215029	0.0323527	0.158116	0.726496	0.791636	0.781112	0.59667	0.59712	0.631107
cg26601496	NFASC	NM_001005388	Body	S_Shelf	1	203221748	R	0.000719319	0.0427523	0.158088	0.83314	0.828971	0.846213	0.735104	0.657002	0.641956
cg07283441	PVT1	NR_003367	Body		8	129101005	R	0.00104543	0.0486701	0.157437	0.359904	0.468458	0.417458	0.254087	0.262667	0.256755
cg27312338	KIFC3	NM_001130099	TSS1500	N_Shelf	16	56389699	F	0.000103348	0.0289223	0.157376	0.693514	0.754022	0.731587	0.557809	0.587764	0.561421
cg22687766				N_Shelf	1	205557575	R	0.000587745	0.0401526	0.157227	0.544829	0.631315	0.605331	0.414869	0.45329	0.441633
cg20876852	MEST	NM_177524	5'UTR	S_Shore	7	129921724	F	0.00015964	0.0306985	0.156611	0.467412	0.539721	0.504729	0.358508	0.339007	0.344514
cg27449041	RERE	NM_012102	5'UTR		1	8772893	R	0.000960016	0.0472598	0.156565	0.550107	0.609256	0.537514	0.435536	0.424871	0.366773
cg25730281	AMMECR1	NM_001171689	Body		X	109355323	R	0.000902967	0.0461139	0.155758	0.624069	0.688758	0.689875	0.471196	0.523018	0.541214
cg10585948	HOXB4	NM_024015	3'UTR	N_Shore	17	44007937	R	0.000593876	0.0403348	0.155597	0.700615	0.772934	0.771533	0.593239	0.61714	0.567911
cg12588200	SUGT1L1	NR_003365	Body		13	40270722	R	0.000313465	0.0342828	0.155532	0.685491	0.689457	0.671312	0.567503	0.5274	0.484762
cg24520885	MYST4	NM_012330	Body		10	76417962	R	7.09108e-06	0.0269557	0.15498	0.483838	0.454769	0.465531	0.316123	0.298346	0.32473
cg08859309	LOC100188949	NR_024464	TSS200		13	29846103	F	0.000794993	0.0443912	0.154549	0.439005	0.517895	0.482596	0.294194	0.324213	0.357442
cg22027151	PDZRN4	NM_001164595	Body		12	40147058	R	4.4282e-05	0.0269557	0.154071	0.806844	0.83548	0.807256	0.68155	0.669718	0.636098
cg23441248					15	47927841	R	0.000108958	0.029118	0.153802	0.830409	0.811672	0.815918	0.680993	0.627919	0.687681
cg23304023	TACC2	NM_206862	Body		10	123939939	F	8.32179e-06	0.0269557	0.153585	0.807966	0.786454	0.781845	0.653848	0.624143	0.637518
cg09191173	NPAT	NM_002519	Body	N_Shelf	11	107595369	R	0.000214038	0.0323527	0.153453	0.6967	0.774211	0.736064	0.580532	0.585701	0.580385
cg06040034	DLGAP2	NM_004745	Body	S_Shore	8	1605855	F	0.000460507	0.0374534	0.153409	0.769957	0.818427	0.79191	0.649636	0.598108	0.672324
cg01799671	CMIP	NM_030629	Body		16	80118253	R	0.000868307	0.045527	0.153204	0.401532	0.336642	0.412065	0.228148	0.200665	0.261813
cg11959316	PPAP2B	NM_177414	Body		1	56774330	R	0.000990001	0.0477651	0.153054	0.857286	0.886509	0.890407	0.753652	0.753093	0.668295
cg03979241	EPB49	NM_001978	1stExon	S_Shelf	8	21972770	F	0.000764702	0.0438309	0.152295	0.601816	0.665116	0.627097	0.522222	0.463338	0.451586
cg15006828					20	44514767	R	4.00848e-05	0.0269557	0.152256	0.752544	0.770323	0.723642	0.606465	0.603664	0.579612
cg25724895	C20orf197	NM_173644	TSS1500		20	58063785	R	0.000383777	0.036029	0.152237	0.590171	0.664324	0.659426	0.49482	0.490335	0.472054
cg11142013	MIPEP	NM_005932	Body		13	23339476	R	4.33408e-05	0.0269557	0.151986	0.750372	0.757287	0.783953	0.624092	0.586601	0.624962
cg13114696	PCNT	NM_006031	Body	Island	21	46633381	R	0.000395208	0.0361229	0.151772	0.876633	0.856808	0.859018	0.758861	0.700815	0.677466
cg09713850	HLA-DMA	NM_006120	TSS1500		6	33029769	F	0.000970268	0.0474631	0.151473	0.567858	0.618076	0.657952	0.438582	0.462413	0.488473
cg04397884	PELI2	NM_021255	Body		14	55735820	F	0.000296686	0.0338267	0.15136	0.428511	0.482453	0.441595	0.323379	0.266404	0.308694
cg00211115				N_Shore	11	68966917	R	6.35784e-05	0.0269557	0.150988	0.610601	0.66259	0.657969	0.482965	0.494385	0.500845
cg12102181	STAG1	NM_005862	5'UTR	N_Shelf	3	137950881	F	0.000197814	0.031819	0.150672	0.611625	0.680965	0.653653	0.513317	0.486505	0.494404
cg06880767	AAK1	NM_014911	Body		2	69606158	F	0.000456614	0.0374074	0.150605	0.727273	0.806937	0.737176	0.603183	0.615832	0.600557
cg26964112	DGAT2L6	NM_198512	TSS200		X	69313998	F	0.000921265	0.0464721	0.150519	0.723868	0.739478	0.785914	0.569738	0.64362	0.584345
cg09100343	CPNE2	NM_152727	Body		16	55704703	R	7.61517e-05	0.0273327	0.150388	0.771606	0.780355	0.802131	0.662283	0.608742	0.631904
cg20360286	LYPD6	NM_194317	5'UTR		2	149931085	F	3.76864e-06	0.0269557	0.150185	0.591886	0.616297	0.592325	0.446435	0.443235	0.460282
cg09579281	NOD1	NM_006092	5'UTR	N_Shelf	7	30481811	F	0.000186251	0.0313812	0.150042	0.544883	0.486918	0.539127	0.39417	0.358039	0.368592
cg13559409	ABCA1	NM_005502	3'UTR		9	106585090	R	0.000108035	0.0291071	0.150036	0.774384	0.788566	0.799026	0.663823	0.644592	0.603451
cg23998240	INF2	NM_022489	5'UTR	N_Shore	14	104237785	R	7.8389e-05	0.0276313	0.149454	0.776474	0.776901	0.790786	0.664824	0.624882	0.606094
cg26683398	LTC4S	NM_145867	TSS1500	N_Shelf	5	179153195	R	0.000104223	0.0290368	0.149081	0.453954	0.460866	0.502303	0.346099	0.311935	0.311845
cg21252175	ZNF609	NM_015042	3'UTR		15	62760956	R	0.00022152	0.0325755	0.14893	0.665828	0.722297	0.710043	0.576743	0.543394	0.531241
cg03879594				S_Shelf	16	83765070	F	0.000561625	0.0396596	0.148536	0.636236	0.717677	0.695986	0.545033	0.543735	0.515522
cg26964875	C3orf63	NM_001112736	Body	N_Shore	3	56690227	R	0.000189233	0.0313922	0.148349	0.66653	0.679439	0.672462	0.565987	0.501339	0.506059
cg24392299	ZNF425	NM_001001661	Body	Island	7	148432741	R	0.000288517	0.0337075	0.148283	0.514355	0.5889	0.563604	0.420785	0.403058	0.398166
cg10656845	POLD2	NM_006230	Body	N_Shelf	7	44126305	F	0.000896049	0.0459515	0.148167	0.783736	0.77437	0.819197	0.67865	0.658964	0.595189
cg24527194	RFX1	NM_002918	3'UTR	Island	19	13934463	R	0.000865897	0.0454824	0.147747	0.618709	0.6681	0.708323	0.498688	0.538454	0.514751
cg22676000	CEACAM6	NM_002483	TSS1500		19	46950921	F	3.30513e-05	0.0269557	0.147411	0.71402	0.763536	0.750221	0.597643	0.591861	0.596042
cg01001791	POLR3H	NM_001018052	3'UTR		22	40254633	F	0.00010256	0.0289132	0.147396	0.758652	0.787771	0.781943	0.661394	0.610579	0.614206
cg15787985	MAP6D1	NM_024871	TSS1500	S_Shore	3	185026743	R	0.000603213	0.0404989	0.147248	0.633981	0.669735	0.638288	0.5314	0.515435	0.453426
cg02931058	KLHL30	NM_198582	TSS200	N_Shore	2	238711984	F	0.00017371	0.0308526	0.146883	0.802793	0.817592	0.784207	0.620961	0.659726	0.683256
cg15141378					5	135343285	F	0.000462372	0.0375221	0.146582	0.791411	0.81405	0.76136	0.679479	0.63481	0.612786
cg02423534	ADCY6	NM_015270	3'UTR		12	47446447	F	0.000746227	0.0434186	0.146418	0.612277	0.664563	0.659459	0.517372	0.455924	0.52375
cg06346335					1	76262480	R	0.00025195	0.032974	0.145916	0.336857	0.391128	0.369966	0.240513	0.190214	0.229476
cg00901982					2	70110802	R	5.85332e-05	0.0269557	0.145787	0.436968	0.483761	0.443812	0.29412	0.313533	0.319526
cg26531286	FARP1	NM_001001715	5'UTR	S_Shelf	13	97597359	R	0.0010477	0.0487091	0.145684	0.787614	0.814776	0.79342	0.681724	0.679802	0.597233
cg07506795	ZNF19	NM_006961	TSS1500		16	70081061	R	0.000609678	0.0405984	0.145619	0.673281	0.74857	0.686594	0.560934	0.575663	0.53499
cg01765653	GABBR1	NM_021904	Body	N_Shore	6	29707139	F	6.95418e-06	0.0269557	0.145314	0.59522	0.569023	0.599702	0.436385	0.451377	0.440242
cg15961219					14	53030156	R	0.000210354	0.032302	0.145266	0.791326	0.836912	0.787684	0.667967	0.679236	0.632921
cg20320472	KDM2A	NM_012308	3'UTR		11	66781602	F	0.000975357	0.0474899	0.145187	0.399063	0.485305	0.454604	0.326923	0.282515	0.293973
cg12927730	KIAA1310	NM_001115016	3'UTR		2	96624501	R	4.29305e-05	0.0269557	0.145177	0.750022	0.78762	0.79448	0.642368	0.635075	0.619148
cg25420839	HIBADH	NM_152740	Body		7	27641961	R	0.000610613	0.0406282	0.14517	0.613284	0.642118	0.67274	0.536035	0.472693	0.483903
cg05490489					16	85487837	F	0.000489577	0.0380412	0.145086	0.819209	0.888537	0.862183	0.687629	0.737703	0.709341
cg27016579					5	168710606	F	0.000294175	0.0337983	0.14506	0.710654	0.721519	0.754167	0.577196	0.618184	0.555779
cg02131674					5	17394065	R	0.000832686	0.0450701	0.144278	0.67614	0.717055	0.715691	0.516443	0.599421	0.560188
cg18915156					17	16360310	R	0.000214801	0.0323527	0.144245	0.719562	0.780482	0.755534	0.630107	0.599413	0.593323
cg24720967					17	27463802	F	0.00097316	0.0474642	0.144234	0.824377	0.858859	0.799951	0.724346	0.679788	0.646352
cg04010868	ZC3H7A	NM_014153	5'UTR		16	11783882	R	4.09363e-06	0.0269557	0.144071	0.780771	0.783983	0.803277	0.645281	0.634804	0.655734
cg08439276					2	68790728	F	0.000359621	0.0355246	0.144033	0.577023	0.654676	0.615947	0.465759	0.484001	0.465788
cg01621943					17	50886408	R	0.000221653	0.0325755	0.143794	0.60951	0.659644	0.641228	0.487651	0.469798	0.52155
cg13312337	LOC100189589	NR_024463	TSS200		2	74466267	R	0.000330562	0.034671	0.143745	0.715597	0.783195	0.778643	0.602158	0.621873	0.622168
cg21356750	EHMT2	NM_006709	Body	N_Shore	6	31972215	R	9.49666e-05	0.0284616	0.1435	0.645448	0.688923	0.674096	0.548063	0.505007	0.524895
cg23916896	AHRR	NM_020731	Body	N_Shore	5	421804	R	0.000578712	0.039994	0.1433	0.315338	0.354707	0.311798	0.226471	0.159633	0.165839
cg06592167					11	109551079	F	0.000189579	0.0313922	0.143225	0.813903	0.849507	0.85279	0.711776	0.663276	0.711472
cg00448875	RAB6B	NM_016577	Body	N_Shore	3	135094316	F	0.00104193	0.0486197	0.142638	0.353947	0.445412	0.429992	0.262022	0.269612	0.269803
cg24376793	PPP1R12B	NM_032105	3'UTR		1	200812212	R	0.000863505	0.0454483	0.142144	0.787998	0.814778	0.828775	0.621336	0.70361	0.680173
cg23438309	MACC1	NM_182762	5'UTR		7	20200300	F	0.000650876	0.0413791	0.142103	0.811671	0.852164	0.854457	0.725511	0.711747	0.654726
cg00908004	PCID2	NM_001127203	Body		13	112880596	R	0.000961735	0.0473033	0.141911	0.830556	0.910938	0.907511	0.724741	0.742203	0.756328
cg12033214	CRYBA4	NM_001886	TSS200		22	25347910	F	0.000271824	0.0334099	0.141522	0.770823	0.841676	0.799989	0.662105	0.651569	0.674248
cg05036615	PHTF2	NM_001127360	3'UTR		7	77390725	F	0.000819868	0.0448139	0.141298	0.75069	0.791531	0.755177	0.670361	0.592943	0.6102
cg00108098	SEMA5B	NM_001031702	Body	N_Shelf	3	124120354	F	7.67895e-06	0.0269557	0.141161	0.724729	0.72037	0.736447	0.594199	0.567579	0.596285
cg07311759	OR5AU1	NM_001004731	1stExon		14	20693644	R	0.000124801	0.0292042	0.141017	0.818378	0.817825	0.836352	0.713142	0.65281	0.683552
cg00321614					5	172789538	R	0.000332137	0.0347444	0.140975	0.665887	0.692666	0.679117	0.496541	0.562966	0.555238
cg12587087					1	154238531	F	0.00035965	0.0355246	0.14071	0.567766	0.630991	0.614377	0.482565	0.468297	0.440141
cg24804768	NINJ2	NM_016533	Body	S_Shelf	12	625172	R	0.00084933	0.0453116	0.14034	0.452444	0.528957	0.451162	0.345371	0.343964	0.32221
cg14898147					12	55375893	F	3.02836e-05	0.0269557	0.140287	0.692222	0.724623	0.719559	0.590659	0.564485	0.560398
cg11941015	C2orf88	NM_001042519	5'UTR	S_Shelf	2	190756229	F	2.60825e-05	0.0269557	0.140238	0.769445	0.762776	0.749406	0.644328	0.609671	0.606912
cg03430526	C8orf80	NM_001010906	TSS1500		8	27997974	F	0.000920752	0.0464592	0.140161	0.791424	0.752902	0.781372	0.682463	0.622969	0.599783
cg11948874	BLCAP	NM_001167823	Body	N_Shore	20	35580741	R	0.000773252	0.0440253	0.140144	0.861936	0.849892	0.861954	0.768613	0.701418	0.683321
cg24815973	BPHL	NR_026648	Body	S_Shore	6	3085900	R	0.00102405	0.048367	0.140069	0.709026	0.741953	0.704599	0.628292	0.559253	0.547828
cg12471171	WNT11	NM_004626	Body		11	75575851	F	4.44779e-05	0.0269557	0.140016	0.957267	0.956549	0.969654	0.841496	0.793581	0.828342
cg03846111	ATF7IP	NM_018179	5'UTR		12	14438496	F	0.00012224	0.0291649	0.139728	0.803617	0.796581	0.765696	0.666208	0.65926	0.621243
cg21580016	KDM2B	NM_032590	Body	N_Shelf	12	120371775	R	5.85039e-05	0.0269557	0.139673	0.691467	0.732007	0.739672	0.588091	0.572037	0.583998
cg14825736	FGF1	NR_026696	TSS1500		5	142058133	R	0.000792509	0.0443567	0.139617	0.746341	0.755154	0.715465	0.552695	0.620743	0.624669
cg15626881					7	33889989	R	0.00089134	0.0458762	0.139586	0.582575	0.55042	0.570139	0.465304	0.38002	0.439051
cg23725454	GSTP1	NM_000852	TSS1500	N_Shore	11	67106771	F	0.000333652	0.0347758	0.139359	0.557947	0.58434	0.611586	0.415077	0.468258	0.452462
cg23598378	C6orf132	NM_001164446	Body	S_Shore	6	42180964	R	0.000510552	0.0385918	0.139024	0.844759	0.871389	0.884225	0.724835	0.693002	0.765463
cg11848173	CD63	NM_001040034	Body	N_Shore	12	54407282	F	2.23504e-05	0.0269557	0.138789	0.702723	0.676075	0.679528	0.566647	0.53945	0.535863
cg11772801	TMX1	NM_030755	Body	S_Shelf	14	50780987	F	0.000480596	0.0379164	0.1386	0.689677	0.682749	0.701345	0.585984	0.508581	0.563404
cg24627325					3	103365016	F	0.000773319	0.0440253	0.138526	0.572206	0.605506	0.623667	0.466554	0.423273	0.495974
cg24714606	MBNL2	NM_144778	Body		13	96817622	R	1.85117e-05	0.0269557	0.138467	0.574969	0.57659	0.590753	0.464468	0.434326	0.428117
cg05560472	SYTL4	NM_001129896	5'UTR	N_Shore	X	99872702	R	4.30168e-05	0.0269557	0.138453	0.498307	0.540477	0.508241	0.379729	0.388251	0.363686
cg00898920				N_Shore	2	241153429	R	3.07927e-05	0.0269557	0.138419	0.550107	0.557535	0.574277	0.444682	0.405699	0.416282
cg07581623	DPYSL2	NM_001386	Body		8	26554747	R	0.000625781	0.0408277	0.13826	0.645689	0.714757	0.723203	0.553835	0.563426	0.551608
cg10122452	SMARCB1	NM_003073	TSS1500	N_Shore	22	22458767	F	0.000973466	0.0474643	0.138236	0.681979	0.668133	0.695645	0.594796	0.510692	0.525562
cg25955126	CRADD	NM_003805	Body		12	92645177	R	4.70761e-05	0.0269557	0.138208	0.66318	0.707865	0.66944	0.537249	0.536511	0.552099
cg06968164					13	44527698	F	0.00037871	0.035933	0.138167	0.707187	0.761741	0.778552	0.600005	0.61101	0.621961
cg08469215	TMEM79	NR_026678	Body	Island	1	154527975	F	0.00104561	0.0486701	0.138152	0.586667	0.672955	0.636729	0.471622	0.501452	0.508822
cg15436385				S_Shelf	11	72535770	F	0.000123126	0.0291709	0.137994	0.599707	0.596288	0.645938	0.477847	0.461007	0.489095
cg11978441	PER3	NM_016831	Body		1	7825359	F	1.20966e-05	0.0269557	0.137939	0.879279	0.891603	0.909952	0.745409	0.753227	0.768381
cg09079613	SLC39A1	NM_014437	Body	N_Shore	1	152200872	R	0.000239848	0.032789	0.137737	0.801919	0.784281	0.81481	0.69945	0.642886	0.645465
cg15001032	DDC	NM_001082971	5'UTR		7	50600488	F	0.000592627	0.0403211	0.137726	0.533393	0.59523	0.556943	0.393888	0.450812	0.427688
cg14452015					9	97850973	F	6.60268e-05	0.0269557	0.137677	0.800117	0.820611	0.81794	0.662543	0.704088	0.659007
cg12825470	ATR	NM_001184	Body	S_Shelf	3	143652393	R	3.82406e-05	0.0269557	0.137671	0.787844	0.834359	0.820797	0.670936	0.682166	0.676886
cg14674856	LTC4S	NM_145867	TSS1500	N_Shelf	5	179152880	R	0.000362977	0.0355752	0.137537	0.68416	0.727966	0.751474	0.584768	0.565649	0.600573
cg22878535				S_Shelf	17	76046222	F	0.000404608	0.0362237	0.137348	0.396643	0.39834	0.456807	0.295427	0.258777	0.285542
cg23005227	CISH	NM_145071	Body	N_Shelf	3	50620430	R	4.66487e-05	0.0269557	0.137156	0.760119	0.777461	0.770133	0.658978	0.624163	0.613105
cg04619644	PDZD4	NM_032512	Body	N_Shore	X	152736328	F	3.54081e-05	0.0269557	0.137077	0.896239	0.908599	0.909766	0.788149	0.772184	0.743041
cg24154777	C14orf73	NM_001077594	1stExon	N_Shore	14	102636341	F	1.01124e-05	0.0269557	0.136891	0.770553	0.780354	0.788892	0.654435	0.624764	0.649927
cg15188939	ARIH1	NM_005744	Body		15	70596208	F	0.000357828	0.035481	0.136742	0.843847	0.823045	0.841813	0.739876	0.6697	0.688904
cg02823066	IGF1	NM_001111285	Body		12	101343878	F	0.000996585	0.0478812	0.136498	0.672848	0.751574	0.692459	0.578648	0.58485	0.543887
cg18685034	DOCK1	NM_001380	Body		10	129135522	F	1.02905e-05	0.0269557	0.136212	0.774935	0.767248	0.786552	0.634755	0.627744	0.657601
cg14443606					9	40526407	R	7.25564e-05	0.0269557	0.135921	0.689046	0.693238	0.691213	0.558136	0.581161	0.526435
cg15226808				S_Shelf	6	125328650	R	0.000316275	0.0343326	0.135793	0.803837	0.814686	0.829989	0.71746	0.649438	0.674238
cg17614506					7	47769597	F	0.00106533	0.0490756	0.135174	0.774152	0.826291	0.791134	0.617829	0.681021	0.687206
cg03693099	CEL	NM_001807	TSS1500		9	134926722	R	0.00101255	0.0481283	0.134936	0.618689	0.651493	0.605804	0.523877	0.50073	0.446571
cg17079034	KLHL30	NM_198582	TSS200	N_Shore	2	238712019	F	1.23438e-05	0.0269557	0.134796	0.475432	0.496121	0.467498	0.331302	0.351543	0.35182
cg02813606	VPS52	NM_022553	Body	N_Shelf	6	33343880	R	0.000369901	0.035653	0.134627	0.651232	0.706361	0.711202	0.566375	0.534753	0.563786
cg23980760	ACCSL	NM_001031854	1stExon		11	44026157	R	5.83066e-05	0.0269557	0.134393	0.624489	0.647392	0.665888	0.528867	0.507604	0.498119
cg07572233					1	232756188	R	0.000135607	0.0296607	0.13439	0.517183	0.507967	0.533691	0.415371	0.360227	0.380074
cg05914150	PIK3R1	NM_181523	TSS200		5	67558088	R	0.00011511	0.0291527	0.134352	0.870366	0.899437	0.871517	0.766058	0.753976	0.718229
cg21226442	C12orf11	NM_018164	Body	N_Shelf	12	26979847	R	0.00016031	0.0307112	0.134282	0.678184	0.731954	0.709876	0.579596	0.553171	0.584401
cg02736746	PLXNA2	NM_025179	Body		1	206330069	R	0.000969289	0.0474391	0.134142	0.78204	0.763593	0.779538	0.689955	0.603645	0.629147
cg19182008					11	26254817	R	0.000125332	0.0292042	0.134018	0.695716	0.715059	0.718669	0.593989	0.589385	0.544016
cg04137004					11	13096655	R	0.000396744	0.0361387	0.133936	0.798988	0.816921	0.857922	0.694151	0.666124	0.711749
cg08305575					5	157951059	R	2.61872e-06	0.0269557	0.133884	0.350373	0.348116	0.370337	0.223399	0.217787	0.22599
cg05405389	DLG2	NM_001142699	Body		11	84064120	R	0.000465148	0.0375355	0.133706	0.779508	0.857009	0.811329	0.681756	0.678925	0.686045
cg23188430					6	125891751	R	0.000495748	0.0381168	0.133666	0.373588	0.400174	0.43767	0.24376	0.280174	0.2865
cg12840024	EPB49	NM_001114135	5'UTR	S_Shore	8	21972202	R	0.000370195	0.035653	0.133578	0.764574	0.802978	0.793143	0.687447	0.625135	0.64738
cg02218776					2	100180645	R	0.000922643	0.0465191	0.13314	0.745951	0.76276	0.786923	0.636838	0.590279	0.669096
cg10210690	C1orf175	NM_001039464	Body		1	54910647	F	1.84702e-05	0.0269557	0.132906	0.765059	0.775649	0.798312	0.648018	0.635165	0.657117
cg05280527	NRXN3	NM_004796	3'UTR	S_Shore	14	79398203	R	6.59551e-05	0.0269557	0.132823	0.680578	0.703971	0.727159	0.564918	0.585249	0.563072
cg24373865	ERI3	NM_024066	Body		1	44488813	F	0.000863004	0.0454483	0.132815	0.636552	0.709862	0.651311	0.525936	0.556411	0.516931
cg09552240					3	14240988	R	3.0809e-05	0.0269557	0.132702	0.797945	0.809244	0.828397	0.684072	0.660827	0.692581
cg07826255	SGCA	NM_001135697	Body		17	45598706	R	0.000563164	0.0396783	0.132679	0.692839	0.752325	0.761907	0.61063	0.585747	0.612656
cg01582532	KIAA0182	NM_001134473	5'UTR	Island	16	84234027	R	0.000139463	0.0298499	0.132554	0.836772	0.842689	0.879508	0.729593	0.69761	0.734105
cg00397422	SLFN14	NM_001129820	1stExon		17	30909162	R	6.21829e-05	0.0269557	0.132484	0.731474	0.75265	0.764011	0.611587	0.639038	0.600058
cg19921389	GP9	NM_000174	5'UTR		3	130262854	R	5.28868e-06	0.0269557	0.132458	0.813169	0.815189	0.827563	0.690017	0.671642	0.69689
cg16460342	P2RX4	NM_002560	Body		12	120146960	F	0.000944923	0.0468623	0.132351	0.353695	0.331273	0.408226	0.248119	0.208894	0.23913
cg14243817				S_Shelf	9	138016700	R	0.000456391	0.0374074	0.132259	0.522913	0.580658	0.546004	0.425692	0.437852	0.389256
cg14977938	ZFYVE21	NM_024071	Body	N_Shelf	14	103260582	F	0.000431631	0.0369637	0.132179	0.798147	0.84162	0.854906	0.67217	0.716629	0.709338
cg06637550	C1QTNF6	NM_031910	TSS1500		22	35915283	F	0.000477122	0.0378081	0.132019	0.613555	0.670295	0.640549	0.533335	0.51398	0.481027
cg14985146	SHROOM2	NM_001649	Body	N_Shelf	X	9815990	F	9.29366e-05	0.0284616	0.131948	0.817498	0.847985	0.864006	0.728368	0.700215	0.70506
cg19731541	NRP2	NM_201279	Body	S_Shelf	2	206261589	F	0.000288114	0.0336765	0.131899	0.718912	0.757105	0.711582	0.592405	0.624529	0.574967
cg03845363	TOM1L2	NM_001033551	Body		17	17694241	F	0.00022077	0.0325755	0.131781	0.660515	0.693774	0.710648	0.554337	0.536417	0.57884
cg02255454					3	178118202	R	9.64728e-05	0.0284616	0.131539	0.784008	0.810778	0.834573	0.692388	0.67011	0.672246
cg03000585	NEXN	NM_144573	5'UTR	S_Shore	1	78127927	F	0.000304125	0.0340405	0.131536	0.485942	0.540096	0.533269	0.36892	0.387933	0.407847
cg08818716	RADIL	NM_018059	Body	S_Shore	7	4843435	F	0.000196918	0.0317679	0.131533	0.430665	0.458084	0.44607	0.332919	0.279639	0.327661
cg08351131	HEXIM2	NM_144608	Body	S_Shelf	17	40598374	R	2.45557e-05	0.0269557	0.131486	0.650238	0.657294	0.677638	0.544824	0.5135	0.532389
cg08261450	TMEM132D	NM_133448	Body	N_Shelf	12	128950687	R	0.000296709	0.0338267	0.130909	0.661333	0.712923	0.667772	0.556902	0.566087	0.526313
cg25185536					2	37495997	R	6.93019e-05	0.0269557	0.1308	0.770538	0.755912	0.790458	0.66378	0.633657	0.627072
cg10235116	RRP15	NM_016052	Body		1	216545852	F	0.000734329	0.0431289	0.130726	0.859526	0.872893	0.861769	0.779452	0.699011	0.723545
cg08679800					8	101981501	R	6.70061e-06	0.0269557	0.130243	0.801406	0.801796	0.825871	0.686573	0.672333	0.679438
cg04083553	GP9	NM_000174	TSS1500		3	130261265	F	0.000387142	0.0360479	0.130169	0.688779	0.708675	0.653867	0.581253	0.538844	0.540717
cg25636466				N_Shelf	6	46760659	F	0.00038657	0.0360479	0.129907	0.289145	0.306262	0.301804	0.206279	0.135593	0.165619
cg25161170					2	39741777	R	0.000448781	0.0373935	0.129874	0.827781	0.855117	0.833847	0.7492	0.690647	0.687275
cg21126020	TRIM10	NM_052828	TSS200		6	30236754	R	0.000156542	0.0305512	0.129687	0.820052	0.858993	0.855139	0.701941	0.70312	0.740059
cg10272492				N_Shelf	7	106593059	R	0.000865383	0.0454737	0.128832	0.56931	0.620611	0.601777	0.506515	0.442201	0.456485
cg26316599	ATP6V0E1	NM_003945	3'UTR		5	172388661	F	0.000182092	0.0313021	0.128818	0.446169	0.50454	0.479951	0.348179	0.337307	0.358721
cg04464062	ZFPM1	NM_153813	Body	Island	16	87067850	F	4.09123e-05	0.0269557	0.128813	0.854733	0.86769	0.875013	0.714707	0.755482	0.740809
cg22571544	PDZD2	NM_178140	Body		5	32050395	R	0.000140884	0.0299384	0.128567	0.616552	0.666288	0.653699	0.531458	0.516642	0.502736
cg23876292	LMAN1	NM_005570	Body	N_Shore	18	55175497	F	0.000227803	0.0327462	0.128541	0.808567	0.838503	0.860986	0.704198	0.690152	0.728084
cg19404444	SKI	NM_003036	Body	S_Shelf	1	2154462	R	0.000270352	0.0334037	0.12854	0.713018	0.755269	0.770931	0.622421	0.600719	0.630457
cg00948677				N_Shore	X	68030162	F	0.000236552	0.0327587	0.128468	0.717595	0.750109	0.752587	0.631632	0.581812	0.621443
cg27652869					5	172149452	R	4.24297e-06	0.0269557	0.128405	0.766823	0.761665	0.764867	0.624806	0.632286	0.651047
cg07598385	ZFPM1	NM_153813	Body	N_Shelf	16	87093984	R	0.000562841	0.0396783	0.128206	0.150036	0.219985	0.175687	0.0486973	0.0407149	0.0716785
cg02902415				N_Shelf	1	109890064	F	2.54306e-06	0.0269557	0.128097	0.684185	0.680554	0.701795	0.556843	0.56113	0.564271
cg01119135	C1orf116	NM_023938	5'UTR		1	205272148	R	0.000277854	0.0334824	0.128063	0.759838	0.734029	0.739492	0.650974	0.591664	0.606532
cg05889171	GRAMD1B	NM_020716	Body	S_Shore	11	122953911	R	0.000272993	0.0334297	0.127976	0.762515	0.801687	0.804508	0.634869	0.668545	0.681366
cg12584865	USP21	NM_012475	Body	N_Shelf	1	159398783	R	0.000134091	0.0295296	0.127857	0.820648	0.804485	0.852078	0.710942	0.679784	0.702914
cg25321854				N_Shelf	18	6906835	R	0.00048648	0.0380395	0.127793	0.73215	0.766197	0.7611	0.593424	0.659026	0.623618
cg24539599	MCC	NM_001085377	TSS1500	S_Shore	5	112852819	R	0.000437598	0.0371243	0.127659	0.48254	0.542011	0.476838	0.364571	0.376613	0.377229
cg03873049	CAMK2A	NM_015981	Body		5	149605387	F	3.35713e-05	0.0269557	0.127597	0.878273	0.84091	0.869533	0.725684	0.734864	0.745377
cg21918313	FBXO41	NM_001080410	Body	Island	2	73349711	R	0.000359305	0.0355172	0.127574	0.809915	0.808834	0.775828	0.700554	0.669866	0.641435
cg26494044	PTPRE	NM_006504	5'UTR		10	129650944	F	3.53092e-05	0.0269557	0.127374	0.765981	0.77544	0.801039	0.63897	0.661741	0.659629
cg05118587	ETV3L	NM_001004341	3'UTR		1	155328794	F	0.000336183	0.0348038	0.127227	0.759219	0.819444	0.799697	0.650056	0.663988	0.682636
cg04702509	TOM1L2	NM_001033551	Body	N_Shore	17	17814908	R	1.65801e-05	0.0269557	0.127199	0.781107	0.784331	0.758629	0.661533	0.643148	0.637788
cg08123045	MEF2D	NM_005920	5'UTR	N_Shelf	1	154733812	F	0.000164755	0.0307314	0.127176	0.870902	0.844675	0.867471	0.758699	0.70583	0.736991
cg10158598	TNS3	NM_022748	Body		7	47311104	R	1.10978e-06	0.0269557	0.127168	0.867421	0.855909	0.859223	0.736723	0.725809	0.738517
cg02742555	INSC	NM_001031853	Body		11	15157268	R	0.00041975	0.0367159	0.12713	0.398041	0.464129	0.456847	0.313708	0.314309	0.30961
cg07958575					7	139853336	R	0.000575354	0.0399312	0.126906	0.523123	0.567971	0.572595	0.458415	0.406349	0.418209
cg05291966					16	51299509	F	0.000747286	0.0434428	0.126527	0.621678	0.686618	0.652231	0.501221	0.530227	0.549499
cg21080710	MGC14436	NR_026661	Body		12	108691412	F	0.000240009	0.032789	0.126215	0.872707	0.889717	0.901924	0.775965	0.728872	0.780867
cg00543840	HSPG2	NM_005529	Body	N_Shore	1	22085963	F	0.000458024	0.0374074	0.126086	0.921223	0.933693	0.939618	0.789804	0.780504	0.845969
cg25567280	RNF13	NM_007282	Body		3	151137229	F	0.000112405	0.029118	0.126058	0.793172	0.826764	0.789086	0.695928	0.659256	0.675665
cg18980148	ST3GAL1	NM_003033	5'UTR		8	134621740	F	5.85148e-05	0.0269557	0.126056	0.239986	0.28464	0.250385	0.139604	0.128031	0.129211
cg01470535	CXCL2	NM_002089	3'UTR	N_Shore	4	75181976	R	0.000306441	0.034136	0.125929	0.673459	0.740243	0.706255	0.585004	0.581978	0.575189
cg15967278				S_Shore	8	30005814	F	3.60691e-05	0.0269557	0.125862	0.396488	0.384328	0.400735	0.28369	0.245289	0.274986
cg13297560	IGF1R	NM_000875	Body		15	97137577	R	9.31422e-05	0.0284616	0.125859	0.591095	0.593118	0.624525	0.474822	0.459426	0.496914
cg16729555	FCAMR	NM_001122979	5'UTR		1	205210156	R	0.000137622	0.0297555	0.125838	0.779244	0.819627	0.82233	0.663186	0.690079	0.690423
cg01790464	SLC7A8	NM_012244	Body		14	22693775	R	0.000129728	0.0292307	0.12582	0.762376	0.787491	0.744228	0.659892	0.626416	0.630327
cg16820973	FGD4	NM_139241	5'UTR		12	32602965	F	6.63321e-05	0.0269557	0.125753	0.877402	0.910899	0.892317	0.784549	0.748375	0.770436
cg13702949				N_Shelf	2	646917	R	0.000184515	0.0313678	0.125636	0.781765	0.816939	0.823583	0.689351	0.697471	0.658555
cg17487029					10	86948747	R	4.77882e-05	0.0269557	0.125622	0.782239	0.795159	0.803082	0.682878	0.676353	0.644383
cg00842549	HOXB3	NM_002146	TSS200	N_Shelf	17	44006919	F	0.00110871	0.0497032	0.125576	0.656255	0.688751	0.663697	0.499595	0.554676	0.577704
cg12357606	CORIN	NM_006587	Body		4	47414137	R	0.000133177	0.0294876	0.125436	0.81496	0.816908	0.860009	0.698237	0.697473	0.719859
cg16597102	EMILIN1	NM_007046	Body	Island	2	27159056	R	0.000172681	0.030852	0.125369	0.693322	0.748972	0.72769	0.600248	0.58654	0.607088
cg26682661	EXOG	NM_005107	Body		3	38536470	R	0.000855013	0.0453623	0.125363	0.611726	0.654987	0.616871	0.539686	0.473473	0.494337
cg05878103					13	61955589	F	2.39699e-06	0.0269557	0.125347	0.722843	0.736166	0.740776	0.614817	0.606929	0.601998
cg17243044	ZBTB12	NM_181842	Body	Island	6	31975924	F	0.000110641	0.029118	0.125256	0.53284	0.537262	0.565047	0.423701	0.397031	0.438649
cg23240589	RTN4	NM_207520	Body		2	55070567	F	1.7337e-05	0.0269557	0.125229	0.805833	0.829453	0.809698	0.700198	0.694657	0.674442
cg02767665	TMEM132D	NM_133448	Body	S_Shore	12	128354338	F	1.34473e-05	0.0269557	0.125079	0.638315	0.647821	0.662239	0.512869	0.522268	0.538002
cg27272363					8	126021033	R	8.65224e-06	0.0269557	0.125078	0.488653	0.487685	0.494588	0.369897	0.348082	0.377711
cg03774648					2	8628707	F	2.11961e-05	0.0269557	0.124959	0.923796	0.904623	0.918634	0.805444	0.794003	0.772729
cg23963517	BICC1	NM_001080512	Body		10	60143878	F	7.94804e-05	0.0276313	0.124861	0.822788	0.844901	0.86798	0.708929	0.732542	0.719615
cg08795557	WBSCR17	NM_022479	Body		7	70559268	F	0.000252982	0.032974	0.12485	0.756049	0.808087	0.809597	0.67835	0.660632	0.660203
cg19495351	UNC80	NM_032504	Body	S_Shore	2	210383336	F	0.000963482	0.0473364	0.124816	0.641528	0.686683	0.725527	0.557445	0.562055	0.55979
cg19270623	CNGA4	NM_001037329	TSS1500	N_Shelf	11	6215669	R	0.000231525	0.0327478	0.124761	0.842769	0.847426	0.868429	0.759835	0.719844	0.704662
cg12877165	ARHGAP8	NM_181335	Body	S_Shelf	22	43564823	F	0.000975365	0.0474899	0.124733	0.71182	0.672033	0.734462	0.576986	0.555895	0.611236
cg03453890	SLC39A4	NM_130849	TSS1500	S_Shore	8	145614343	F	0.000770368	0.0439915	0.124731	0.516385	0.588482	0.581674	0.430911	0.441281	0.440157
cg19399100					4	70554284	F	0.000291143	0.0337564	0.12473	0.673458	0.709712	0.686712	0.562197	0.594153	0.539342
cg04070601	FMNL3	NM_198900	Body		12	48354154	R	0.000315497	0.0343137	0.124709	0.552793	0.614506	0.604887	0.46678	0.460459	0.470822
cg16248435	JARID2	NM_004973	Body		6	15466278	F	0.000439906	0.0371662	0.124641	0.657796	0.692274	0.69964	0.5795	0.526645	0.569644
cg23784132	TRIM15	NM_033229	Body		6	30240450	R	5.43224e-05	0.0269557	0.124617	0.755215	0.769166	0.766984	0.658167	0.644736	0.614612
cg07235577	SNTG1	NM_018967	5'UTR		8	51202024	F	0.000333697	0.0347758	0.124393	0.630613	0.693746	0.667875	0.52877	0.552388	0.537896
cg16843797	TRAIP	NM_005879	3'UTR		3	49841350	R	0.000644729	0.0412348	0.124376	0.585327	0.655652	0.625206	0.510032	0.479775	0.503248
cg18838605					4	185757410	F	0.000419605	0.0367159	0.124366	0.852018	0.891628	0.894664	0.728156	0.756302	0.780752
cg14760020					3	172012471	R	4.50773e-05	0.0269557	0.124365	0.774252	0.779579	0.788971	0.675813	0.660243	0.633652
cg09212118	GUCA2A	NM_033553	TSS200		1	42403113	R	0.000191771	0.0315549	0.124146	0.664313	0.708661	0.714072	0.556958	0.582269	0.57538
cg04453050	GRM2	NM_000839	TSS200	Island	3	51715936	F	3.07321e-05	0.0269557	0.123889	0.289139	0.292398	0.26309	0.14435	0.158048	0.170563
cg26673195	G6PC	NM_000151	TSS200		17	38306255	R	0.000105976	0.0291071	0.123878	0.738761	0.773016	0.778267	0.622876	0.654938	0.640595
cg01831454	SH3TC2	NM_024577	Body		5	148397365	R	3.52137e-05	0.0269557	0.123853	0.479757	0.510717	0.490243	0.382186	0.373011	0.353961
cg09134497					1	154239910	F	0.000344068	0.0350035	0.12379	0.820514	0.815824	0.810518	0.65867	0.691044	0.725772
cg13384850	ESYT2	NM_020728	Body		7	158282281	F	2.2129e-05	0.0269557	0.123771	0.645891	0.673377	0.651773	0.547939	0.526761	0.525027
cg12300018	NKAIN3	NM_173688	3'UTR		8	64066128	F	0.000154546	0.0305139	0.123566	0.715018	0.75716	0.749343	0.61397	0.600465	0.636389
cg10366878	ANXA3	NM_005139	3'UTR		4	79750321	R	0.000484132	0.0380178	0.123526	0.457616	0.519399	0.519878	0.377283	0.369129	0.379905
cg19052272	ALLC	NM_018436	TSS1500		2	3682405	R	0.000898593	0.0460158	0.123517	0.680859	0.721298	0.737001	0.593719	0.558574	0.616316
cg06787633	TESC	NR_031766	Body	S_Shelf	12	115971261	F	2.34922e-05	0.0269557	0.123495	0.840609	0.849082	0.84956	0.744505	0.714409	0.709851
cg26123647	MYT1L	NM_015025	5'UTR	S_Shore	2	2174406	F	0.000479873	0.0378745	0.123458	0.711416	0.733844	0.701241	0.563693	0.626874	0.58556
cg23561531					11	126834057	R	2.56105e-06	0.0269557	0.123397	0.698464	0.703187	0.695631	0.576299	0.585971	0.56482
cg23925173	RASAL1	NM_004658	3'UTR		12	112021990	F	0.000565218	0.0397241	0.123392	0.71008	0.771383	0.746486	0.597255	0.63928	0.621239
cg11645453	ITIH4	NM_001166449	5'UTR		3	52839734	F	0.000863046	0.0454483	0.123355	0.587328	0.655662	0.64451	0.492934	0.498634	0.525866
cg26645237					5	157665866	R	0.000401218	0.0361492	0.123328	0.828036	0.83302	0.793535	0.675765	0.726291	0.68255
cg16439130	MAP3K7IP2	NM_015093	5'UTR		6	149700241	F	0.000990187	0.0477651	0.123094	0.679246	0.742699	0.729903	0.602866	0.566221	0.613477
cg05212460	MAD1L1	NM_003550	Body		7	2116340	R	0.00053657	0.0390864	0.12305	0.588955	0.64256	0.61451	0.487151	0.519749	0.469975
cg11297236	PDILT	NM_174924	TSS1500		16	20323976	F	0.000307629	0.0341909	0.123018	0.738859	0.792932	0.747901	0.641351	0.649874	0.619413
cg01459453	SELP	NM_003005	Body		1	167865836	R	5.89941e-05	0.0269557	0.122991	0.806188	0.823067	0.809523	0.715125	0.677211	0.677469
cg18190861				S_Shelf	12	50975365	R	2.9208e-05	0.0269557	0.122928	0.820503	0.797498	0.817035	0.679021	0.679906	0.707325
cg12656312	OR56A4	NM_001005179	1stExon		11	5980842	R	3.07529e-06	0.0269557	0.122923	0.572542	0.575837	0.567901	0.459729	0.437601	0.45018
cg02727811	CTBP2	NM_001083914	5'UTR		10	126726978	F	3.64668e-05	0.0269557	0.122917	0.731864	0.765449	0.761676	0.623741	0.642472	0.624024
cg17780682	ABR	NM_021962	Body	N_Shore	17	860748	R	0.000318549	0.034422	0.122719	0.773157	0.812578	0.820142	0.67408	0.660869	0.70277
cg08301612	HEXIM1	NM_006460	1stExon	S_Shore	17	40584354	F	0.00110518	0.0496896	0.122703	0.652595	0.726409	0.680152	0.579785	0.540713	0.570549
cg16035777	MFSD4	NM_181644	Body		1	203816771	R	1.78833e-05	0.0269557	0.122625	0.854359	0.877247	0.865413	0.743977	0.728467	0.756701
cg21069434	MYT1L	NM_015025	5'UTR	N_Shore	2	2171079	F	0.000198448	0.0318222	0.122456	0.798746	0.850993	0.807693	0.684496	0.699721	0.705847
cg20333014	ALDH3B2	NM_001031615	5'UTR		11	67198702	R	0.000124809	0.0292042	0.122223	0.755161	0.797867	0.795188	0.668647	0.645366	0.667533
cg03969725	UBE2C	NM_181801	5'UTR	S_Shore	20	43875426	F	0.000186315	0.0313812	0.122092	0.679334	0.701727	0.694735	0.60126	0.555413	0.552847
cg19323059	LOC285954	NR_027118	Body	S_Shelf	7	41715869	F	0.000133075	0.0294876	0.122084	0.71807	0.731489	0.758678	0.604992	0.635032	0.60196
cg02745459					15	94008501	R	0.00100146	0.0478897	0.122044	0.762295	0.788197	0.71409	0.640135	0.612942	0.645373
cg10878542				N_Shelf	14	54661665	R	0.000119564	0.0291649	0.121998	0.807415	0.815203	0.847668	0.692971	0.690855	0.720468
cg00298951	CMKLR1	NM_001142344	TSS1500		12	107257921	R	0.000582762	0.0400557	0.121975	0.749939	0.817993	0.800617	0.656696	0.666682	0.679246
cg01984237	FXN	NM_001161706	Body	Island	9	70871925	R	7.73221e-06	0.0269557	0.12191	0.874273	0.879261	0.866168	0.75687	0.760946	0.736158
cg24128316	MYOM1	NM_003803	5'UTR		18	3209966	R	0.000405884	0.0362642	0.121881	0.377941	0.424999	0.414295	0.310741	0.276689	0.264161
cg22989419	PLCB4	NM_182797	Body		20	9288396	F	0.000751721	0.0435353	0.121775	0.313629	0.338859	0.291399	0.196682	0.160167	0.221711
cg14205001	NOTCH1	NM_017617	Body	S_Shore	9	138526336	R	0.000470304	0.0376625	0.121649	0.50829	0.55961	0.527633	0.424748	0.382272	0.423565
cg20023788					2	221559565	R	1.01804e-05	0.0269557	0.121601	0.727439	0.74497	0.755885	0.625126	0.624853	0.613513
cg09761846	P2RX3	NM_002559	Body	N_Shore	11	56873738	F	6.02734e-05	0.0269557	0.121497	0.79327	0.798202	0.771152	0.686397	0.650687	0.66105
cg12315353	GABBR1	NM_021904	Body		6	29681068	R	9.98446e-06	0.0269557	0.121225	0.684588	0.686408	0.686179	0.573429	0.546446	0.573627
cg07521929	SLC4A9	NM_031467	Body	N_Shore	5	139722467	R	0.000176918	0.0310789	0.121125	0.831431	0.870897	0.831225	0.711881	0.714346	0.74395
cg14204586	ARHGEF2	NM_004723	Body		1	154198482	F	0.000633002	0.0410417	0.121111	0.673254	0.670557	0.70478	0.535148	0.552463	0.597645
cg23768816	SRCRB4D	NM_080744	3'UTR	N_Shelf	7	75856694	R	0.00012862	0.0292137	0.121047	0.769375	0.822291	0.801377	0.670601	0.679623	0.679679
cg05959464					8	70227010	R	0.00022231	0.0325755	0.121035	0.752556	0.812747	0.778241	0.658595	0.663339	0.658505
cg05944661				S_Shelf	1	6380386	R	0.000225366	0.0326564	0.121034	0.731171	0.762929	0.770121	0.659388	0.620016	0.621715
cg23516680	NOLC1	NM_004741	3'UTR		10	103913323	F	0.00108932	0.0494501	0.121013	0.522499	0.595826	0.588329	0.460393	0.442407	0.440814
cg18113803	MOSC1	NM_022746	Body		1	219044481	F	0.000755491	0.0435816	0.120947	0.700188	0.768956	0.729796	0.616594	0.627001	0.592504
cg16301004	ITPRIP	NM_033397	5'UTR		10	106072527	R	0.000738239	0.0431959	0.120894	0.791771	0.827853	0.842722	0.732565	0.683077	0.684023
cg08623979	CSF3R	NM_156038	Body		1	36709226	R	0.000624694	0.0407904	0.120886	0.773643	0.803078	0.772564	0.674497	0.624805	0.687327
cg04196516	NKD1	NM_033119	3'UTR		16	49225456	R	0.00104807	0.0487091	0.120884	0.794917	0.816757	0.851056	0.673311	0.693922	0.732845
cg10815420	LRP12	NM_001135703	Body	N_Shore	8	105669011	R	0.000462822	0.0375284	0.12088	0.771914	0.826548	0.767671	0.662913	0.68193	0.658651
cg23045972					3	119712918	R	0.000127509	0.0292137	0.120779	0.729781	0.764603	0.722994	0.611089	0.635887	0.608064
cg15697160	NIPAL3	NM_020448	5'UTR	S_Shore	1	24616079	R	0.000734492	0.0431289	0.1205	0.411815	0.467714	0.406217	0.291379	0.306006	0.326859
cg20699548	NCOA2	NM_006540	Body		8	71223192	R	6.79736e-05	0.0269557	0.120364	0.473238	0.499918	0.509299	0.390542	0.365266	0.365555
cg27347104	VWF	NM_000552	1stExon		12	6103918	R	0.000101478	0.0288336	0.120149	0.570445	0.588876	0.607104	0.483427	0.448668	0.473884
cg16937410					3	30417678	F	0.00102135	0.0483009	0.120144	0.636028	0.648427	0.591548	0.528452	0.474204	0.512917
cg12627844	VPS54	NM_016516	5'UTR	N_Shore	2	64098504	R	0.000381126	0.0359427	0.119952	0.473176	0.515344	0.527153	0.388179	0.366242	0.401398
cg14224444	SLC35F1	NM_001029858	Body		6	118693883	F	1.4303e-06	0.0269557	0.119753	0.861566	0.872128	0.860753	0.750519	0.738563	0.746106
cg09981841	EPN2	NM_001102664	5'UTR		17	19117980	F	0.000250206	0.0329414	0.119721	0.756783	0.79666	0.815896	0.665366	0.676445	0.668366
cg18797590	CC2D2A	NM_001080522	Body		4	15089741	R	0.00100538	0.0479603	0.119686	0.777081	0.829629	0.770068	0.693392	0.678479	0.645847
cg13644626	PALM2	NM_001037293	Body	S_Shelf	9	111585172	R	0.000357383	0.035481	0.119674	0.721475	0.783269	0.736651	0.621645	0.635267	0.62546
cg03173570	SOD1	NM_000454	TSS1500	N_Shore	21	31953263	R	0.000418703	0.0367159	0.119654	0.763428	0.744931	0.78167	0.670512	0.61353	0.647025
cg09478002					2	71797673	R	3.43832e-05	0.0269557	0.119646	0.749761	0.741144	0.711569	0.610371	0.615953	0.617211
cg20857767	NCAM1	NM_181351	3'UTR		11	112652385	R	0.000356782	0.035481	0.11958	0.741	0.783088	0.728731	0.627235	0.649493	0.61735
cg19916364	DEPDC1	NM_017779	Body	N_Shore	1	68734426	F	0.00051806	0.038734	0.119539	0.394612	0.448182	0.390761	0.282758	0.283088	0.309093
cg26985681	NTAN1	NM_173474	Body		16	15042898	F	0.000332179	0.0347444	0.119512	0.737029	0.766755	0.712681	0.623386	0.634763	0.599782
cg07974891	ITGB1BP1	NM_022334	TSS1500	S_Shore	2	9482493	R	0.000619343	0.040773	0.119501	0.80944	0.855345	0.849637	0.705709	0.74961	0.7006
cg07279442	SLC12A8	NM_024628	Body		3	126331325	R	2.91067e-05	0.0269557	0.119272	0.768974	0.76045	0.746839	0.65801	0.629447	0.630989
cg00729699	EPB49	NM_001114135	5'UTR	S_Shelf	8	21974021	R	0.000178592	0.0311205	0.119264	0.668799	0.69683	0.689687	0.591298	0.563925	0.542302
cg05044778	PLXNA1	NM_032242	Body	N_Shore	3	128218415	R	4.56035e-05	0.0269557	0.119163	0.766032	0.80556	0.795258	0.675354	0.662594	0.671413
cg26879116					4	89064520	F	0.0001433	0.0300823	0.119163	0.621489	0.57381	0.59538	0.481699	0.463012	0.48848
cg14012686	C2orf65	NM_138804	3'UTR	S_Shelf	2	74639258	F	0.00104165	0.0486197	0.119016	0.705015	0.720208	0.717052	0.638191	0.587547	0.559488
cg08573089	BAG3	NM_004281	Body		10	121414150	F	1.09651e-05	0.0269557	0.118782	0.771153	0.793196	0.790799	0.674981	0.6682	0.655621
cg09581611	SLC12A4	NM_001145962	3'UTR		16	66535659	R	0.000131772	0.0294362	0.118679	0.856262	0.891081	0.900682	0.774477	0.749599	0.767911
cg12269535	SRF	NM_003131	Body	Island	6	43249992	R	0.000201664	0.0320018	0.118642	0.543784	0.575129	0.559971	0.441555	0.465203	0.416199
cg03321829	ERGIC1	NM_001031711	Body		5	172228259	F	0.000368538	0.035653	0.118635	0.624405	0.67767	0.665601	0.553126	0.539835	0.518811
cg18835865	FRMD6	NM_001042481	5'UTR		14	51090476	F	0.000860264	0.045434	0.118515	0.832941	0.88907	0.816736	0.732919	0.732655	0.717628
cg05836943	ATP2A1	NM_173201	TSS1500	N_Shelf	16	28796426	R	0.000222212	0.0325755	0.118465	0.581265	0.614823	0.619379	0.499562	0.462373	0.498136
cg05376937	CNIH3	NM_152495	Body		1	222886300	F	2.57669e-05	0.0269557	0.118438	0.720318	0.731219	0.739188	0.594215	0.614703	0.626491
cg00594793	TEC	NM_003215	Body		4	47871170	R	0.000202727	0.0320018	0.118413	0.819857	0.843915	0.846771	0.746974	0.700283	0.708047
cg00541500	LOC100133308	NR_024472	Body		10	44962606	R	5.30077e-05	0.0269557	0.118403	0.395081	0.385569	0.378445	0.291496	0.255182	0.257208
cg09356916					4	23400571	R	8.12446e-05	0.0277514	0.118311	0.765893	0.790496	0.813794	0.669274	0.671703	0.674273
cg03155345					4	11251508	F	2.1817e-05	0.0269557	0.118295	0.7628	0.771962	0.767301	0.66296	0.654921	0.629297
cg12410310	LGALS12	NM_001142537	1stExon		11	63032414	F	9.52628e-06	0.0269557	0.118273	0.692522	0.701604	0.687284	0.585396	0.580527	0.560667
cg20239391	ELMO2	NM_182764	5'UTR	N_Shelf	20	44464139	R	6.70124e-05	0.0269557	0.118067	0.798175	0.837231	0.823271	0.687958	0.706326	0.710192
cg27190398	STUB1	NM_005861	Body	Island	16	671845	R	0.000427733	0.0369086	0.118063	0.844187	0.890758	0.896977	0.741543	0.759916	0.776273
cg23301563				S_Shelf	2	101136958	F	0.000205691	0.0321699	0.118052	0.774728	0.822396	0.816268	0.671976	0.697484	0.689777
cg23753006					2	142760527	F	9.65889e-05	0.0284616	0.118034	0.74957	0.726453	0.740575	0.63849	0.596193	0.627815
cg03015368	GRIN2A	NM_001134407	Body		16	9972723	R	0.000334432	0.0347758	0.117984	0.728987	0.765691	0.776621	0.616632	0.655234	0.645483
cg17423650	C1orf26	NM_017673	Body		1	183485348	R	4.67804e-05	0.0269557	0.117912	0.495942	0.524574	0.533944	0.402588	0.391295	0.406839
cg11987853	PCID2	NM_001127203	Body		13	112880522	F	0.000828223	0.0449438	0.11788	0.830718	0.873582	0.872151	0.71516	0.77348	0.73417
cg13053150	PKIB	NM_181794	5'UTR	N_Shelf	6	122970706	R	0.000880584	0.0456883	0.117533	0.808449	0.779279	0.794099	0.683231	0.708461	0.637536
cg04667114					13	33083082	F	3.02793e-05	0.0269557	0.117419	0.776068	0.811229	0.800951	0.678171	0.672018	0.685802
cg03082523	PRDM16	NM_022114	Body	N_Shore	1	3145825	F	5.97244e-05	0.0269557	0.117418	0.715569	0.746312	0.704087	0.59886	0.60759	0.607265
cg00193668	HINT2	NM_032593	Body	N_Shore	9	35804283	F	0.000449532	0.0373935	0.117297	0.563608	0.612851	0.607024	0.468806	0.50048	0.462305
cg02658551	KLKB1	NM_000892	TSS1500		4	187385003	R	0.000531944	0.0390059	0.117289	0.728977	0.783426	0.778773	0.626526	0.659993	0.65279
cg20936892	GDPD1	NM_182569	TSS1500	N_Shore	17	54652088	F	0.000801798	0.0445162	0.11721	0.43475	0.450518	0.482688	0.308626	0.366568	0.341131
cg13578465	INF2	NM_022489	5'UTR	Island	14	104238502	F	0.000614972	0.0407423	0.117069	0.811705	0.871985	0.844567	0.747405	0.7098	0.719846
cg08097359	NOSIP	NM_015953	5'UTR	S_Shelf	19	54755866	R	0.000811738	0.0446609	0.116965	0.533307	0.53098	0.518013	0.440146	0.368932	0.422328
cg17830420	CADPS2	NM_001009571	Body		7	122176147	R	0.000411904	0.0364408	0.116864	0.566496	0.606576	0.58378	0.447473	0.498074	0.460713
cg27573298					1	14570176	F	3.04644e-05	0.0269557	0.116807	0.583772	0.607293	0.602639	0.496609	0.467419	0.479255
cg18524099	ARHGAP6	NM_013427	Body		X	11366244	R	6.21416e-05	0.0269557	0.116778	0.845732	0.845279	0.844437	0.754178	0.713693	0.717245
cg25307521	KIAA1026	NM_001017999	Body		1	15228568	R	0.000406625	0.0362895	0.116728	0.83685	0.849304	0.857151	0.761312	0.69881	0.732999
cg19335412	ACTA2	NM_001613	3'UTR		10	90684855	F	0.000253838	0.032974	0.116719	0.566701	0.60495	0.590253	0.491951	0.473362	0.446435
cg06458086	EPB41L2	NM_001431	3'UTR		6	131204093	F	1.92526e-06	0.0269557	0.11669	0.769204	0.77424	0.778544	0.66124	0.648125	0.662552
cg24387800				N_Shore	8	949140	R	7.88402e-06	0.0269557	0.116685	0.765638	0.772494	0.781069	0.663953	0.662262	0.642931
cg16729016	RPS6KC1	NM_012424	Body		1	211364684	F	0.000108532	0.0291071	0.116663	0.818327	0.837974	0.845931	0.733712	0.724493	0.694039
cg12786198	FBXO34	NM_017943	5'UTR	S_Shelf	14	54811467	F	9.60913e-06	0.0269557	0.116645	0.727302	0.731019	0.739218	0.611638	0.630861	0.605105
cg02917236	MIR548A2	NR_030317	Body		3	64878226	R	0.000150949	0.0304156	0.116562	0.83602	0.836119	0.799567	0.723907	0.707612	0.6905
cg12044923	STK32B	NM_018401	Body		4	5258213	F	4.33088e-06	0.0269557	0.116538	0.778118	0.774711	0.765895	0.664347	0.645015	0.659748
cg00767201					19	21932903	R	0.000551916	0.0394202	0.116516	0.713832	0.709042	0.6621	0.585239	0.555837	0.594348
cg08852641	CYP2B6	NM_000767	Body		19	46201938	R	0.000677538	0.0419352	0.116392	0.688577	0.710707	0.735831	0.620238	0.600178	0.565522
cg26586719					16	53113051	R	0.000438301	0.0371243	0.116339	0.779041	0.791503	0.833529	0.666067	0.689476	0.699514
cg08584947					8	93537493	F	0.000393155	0.0361097	0.116318	0.774077	0.765232	0.7608	0.655209	0.67957	0.616376
cg02743674	TRPM5	NM_014555	Body	N_Shore	11	2390044	R	9.52114e-05	0.0284616	0.116294	0.731143	0.762603	0.767729	0.650478	0.622275	0.639841
cg00337440	PTK2B	NM_173176	TSS1500	N_Shore	8	27238039	R	0.000206342	0.0321999	0.116228	0.601169	0.604107	0.650259	0.509222	0.503498	0.494129
cg25524052					4	183032800	R	0.000861441	0.045434	0.116088	0.718316	0.779363	0.724448	0.626346	0.641672	0.605846
cg21164050					13	26655411	F	1.65985e-05	0.0269557	0.11607	0.697341	0.705834	0.677486	0.574142	0.586726	0.571583
cg16166230	ACCN1	NM_001094	Body	N_Shelf	17	29504776	F	0.000447789	0.0373624	0.115962	0.773222	0.80468	0.822388	0.671112	0.70973	0.671561
cg09634094					15	72911296	R	9.08692e-05	0.0284311	0.115927	0.779595	0.811084	0.806185	0.664784	0.6856	0.698699
cg04662594	EPB49	NM_001114135	5'UTR	S_Shelf	8	21972961	R	0.00036924	0.035653	0.115919	0.501292	0.562561	0.529001	0.414727	0.424447	0.405922
cg04227026	FATE1	NM_033085	1stExon		X	150635317	F	5.55781e-05	0.0269557	0.115875	0.825284	0.829201	0.804644	0.710255	0.71694	0.684312
cg03345668	MOBKL2C	NM_145279	TSS1500	N_Shore	1	46854111	F	0.000184109	0.0313678	0.115815	0.832101	0.854124	0.854387	0.759557	0.716464	0.717146
cg25363387	CCDC46	NM_001037325	TSS1500		17	61254326	R	1.716e-05	0.0269557	0.115805	0.731366	0.749421	0.73512	0.628301	0.633009	0.607182
cg10941185	DLC1	NM_006094	Body	N_Shore	8	13032887	R	0.000350123	0.0352354	0.115805	0.779636	0.806088	0.80216	0.688957	0.648529	0.702984
cg23974739	SRD5A1	NM_001047	Body	S_Shelf	5	6690525	F	3.21892e-06	0.0269557	0.115803	0.821776	0.817883	0.824738	0.69466	0.707442	0.714887
cg11730703	INF2	NM_022489	5'UTR	N_Shore	14	104238652	R	1.70686e-05	0.0269557	0.115748	0.88329	0.888951	0.891769	0.789988	0.758447	0.76833
cg04555665	PDRG1	NM_030815	TSS1500	S_Shore	20	30003965	F	0.000205785	0.0321699	0.115703	0.596101	0.633242	0.620347	0.486231	0.525233	0.491117
cg08726667	CCDC101	NM_138414	5'UTR		16	28480880	R	0.000561095	0.0396455	0.115695	0.579414	0.616557	0.557997	0.449156	0.485167	0.47256
cg16812893	KRTAP15-1	NM_181623	3'UTR		21	30734946	R	0.000272969	0.0334297	0.115669	0.819944	0.827949	0.812482	0.726254	0.715656	0.671457
cg05240350				S_Shelf	10	71891850	F	0.000292647	0.0337564	0.115537	0.652947	0.669405	0.674736	0.57955	0.547762	0.523163
cg09264489	PLEKHA6	NM_014935	5'UTR		1	202524029	R	7.73608e-05	0.0275266	0.115525	0.760022	0.785297	0.798588	0.660975	0.656493	0.679865
cg26840970	ZNF19	NM_006961	TSS200		16	70080933	R	0.000133799	0.0295098	0.115493	0.759396	0.796888	0.804293	0.681612	0.670249	0.662235
cg10168086					16	26407467	R	0.000826941	0.0449081	0.115336	0.780862	0.831716	0.803841	0.674485	0.673938	0.721989
cg16225218	FBXW11	NM_033645	Body		5	171305300	R	8.79565e-05	0.0280567	0.115289	0.806183	0.830279	0.85132	0.708732	0.710772	0.72241
cg01287218	RETNLB	NM_032579	TSS200		3	109958968	R	0.000155794	0.0305139	0.115281	0.837496	0.83988	0.825985	0.723527	0.742396	0.691596
cg00577417	ZNF219	NM_001101672	Body	Island	14	20630323	F	0.000250002	0.0329406	0.115277	0.695796	0.740389	0.731947	0.604585	0.626155	0.591562
cg03369382	HIPK2	NM_001113239	Body		7	139074115	R	5.09616e-05	0.0269557	0.115267	0.798322	0.817809	0.803507	0.710941	0.673928	0.688967
cg15574321	WNT11	NM_004626	3'UTR		11	75575075	R	0.000111909	0.029118	0.115265	0.852981	0.880669	0.889109	0.744547	0.776694	0.755723
cg24007886	OBFC2B	NM_024068	Body		12	54909200	F	0.00030894	0.0342318	0.115262	0.769537	0.793123	0.805722	0.69286	0.683448	0.646287
cg11700959	PTPN6	NM_002831	Body		12	6936925	R	7.52594e-05	0.0272346	0.115253	0.798284	0.826278	0.840951	0.709327	0.712498	0.69793
cg16852483	ITGBL1	NM_004791	TSS1500	N_Shelf	13	100901931	F	0.000475107	0.0377465	0.115252	0.681782	0.743987	0.726111	0.595069	0.613358	0.597698
cg04394710					3	68122173	F	0.000367238	0.035653	0.115236	0.614554	0.634409	0.639197	0.480977	0.534702	0.526774
cg23026228				S_Shelf	6	159659081	R	0.000503765	0.0384048	0.115178	0.626944	0.687112	0.678681	0.539892	0.548721	0.558591
cg15871371	FOXP1	NM_032682	5'UTR		3	71357314	F	3.8476e-06	0.0269557	0.115159	0.797217	0.808073	0.808566	0.700023	0.682635	0.685722
cg19123356	FAM49B	NM_016623	5'UTR		8	130968015	R	0.000139488	0.0298499	0.115156	0.688408	0.73117	0.706637	0.587876	0.610449	0.582422
cg14080050	B4GALT1	NM_001497	Body		9	33149025	R	1.30732e-06	0.0269557	0.115103	0.560026	0.553675	0.551001	0.439915	0.445892	0.433586
cg04788993	B3GALTL	NM_194318	Body		13	30698059	R	0.000276648	0.0334422	0.115043	0.827598	0.8637	0.872097	0.719064	0.744227	0.754975
cg07629125	PCDH17	NM_001040429	Body		13	57197016	R	9.48907e-06	0.0269557	0.115001	0.761676	0.785999	0.777127	0.668485	0.656073	0.655241
cg16165258	OSBPL8	NM_020841	5'UTR		12	75451338	R	0.000591179	0.0402759	0.114978	0.848202	0.883036	0.853443	0.724525	0.780054	0.735169
cg25083922					8	142454062	R	2.25043e-05	0.0269557	0.114951	0.878598	0.857572	0.890891	0.764159	0.754748	0.763301
cg00973118	AXIN1	NM_003502	Body	N_Shore	16	314571	R	7.87675e-05	0.0276313	0.114853	0.455421	0.48256	0.4713	0.333496	0.363455	0.367771
cg04554195	FPR2	NM_001005738	5'UTR		19	56960626	R	0.000133515	0.0294877	0.114849	0.803291	0.852187	0.825947	0.70353	0.719627	0.713721
cg27292264	MIR1280	NR_031703	TSS1500		3	129562326	R	0.000170995	0.0308336	0.11483	0.774209	0.812282	0.814429	0.669088	0.698406	0.688935
cg13336662					8	76309854	F	9.83888e-05	0.0286197	0.114794	0.678071	0.688988	0.647918	0.56618	0.543959	0.560456
cg10336309	RFTN1	NM_015150	Body		3	16456760	R	1.07216e-05	0.0269557	0.114686	0.792566	0.818449	0.808761	0.684024	0.696248	0.695446
cg23062357					14	22008515	R	0.000965503	0.0473656	0.114553	0.630065	0.696636	0.674469	0.532971	0.568958	0.555583
cg24294950	GRM8	NM_001127323	Body		7	126540147	R	0.000419642	0.0367159	0.114514	0.629646	0.692292	0.654071	0.537078	0.543339	0.552051
cg01185573					3	136915241	R	0.00022544	0.0326564	0.114457	0.727476	0.773919	0.730746	0.620505	0.643289	0.624975
cg05931497	LARP4B	NM_015155	Body		10	857221	R	0.000768389	0.0439321	0.114409	0.811193	0.801251	0.841201	0.711267	0.670139	0.72901
cg24079972	AMBRA1	NM_017749	Body		11	46442894	R	2.00254e-05	0.0269557	0.114332	0.789203	0.786698	0.781665	0.689359	0.66872	0.656492
cg08531890					5	136140514	R	0.000394479	0.0361224	0.114314	0.814963	0.808884	0.854072	0.693799	0.734112	0.707065
cg23229224					2	7478711	R	0.000224401	0.0326109	0.114204	0.779902	0.785395	0.819347	0.694417	0.68844	0.659176
cg13060421	C15orf52	NM_207380	3'UTR		15	38411330	R	0.000305072	0.0340426	0.114176	0.819552	0.846928	0.864063	0.752868	0.718236	0.716913
cg11287987	SOST	NM_025237	TSS1500	S_Shelf	17	39192574	R	0.00030055	0.0339271	0.114013	0.609397	0.646364	0.657596	0.527308	0.538313	0.505698
cg08352786	MYF6	NM_002469	TSS1500	N_Shore	12	79624534	R	0.000108351	0.0291071	0.114001	0.796812	0.797704	0.811968	0.661702	0.702973	0.699807
cg14716968	DLG2	NM_001364	TSS1500		11	84313554	R	0.000481399	0.0379228	0.114	0.662836	0.625849	0.611622	0.528859	0.533098	0.496349
cg05713794	GP5	NM_004488	5'UTR	S_Shore	3	195601150	R	0.000672291	0.041825	0.113975	0.808328	0.796478	0.789397	0.714481	0.690782	0.647015
cg03075214	C11orf2	NM_013265	Body	S_Shelf	11	64624490	R	0.000139314	0.0298449	0.113964	0.910967	0.91563	0.926829	0.829465	0.780726	0.801342
cg00955413	TMED7-TICAM2	NM_001164468	Body	N_Shore	5	114963696	F	0.000409917	0.0364049	0.113738	0.780196	0.76916	0.763962	0.692466	0.645787	0.633852
cg04708790	OAS1	NM_002534	3'UTR		12	111840058	R	0.000273432	0.0334297	0.113664	0.836969	0.860576	0.88875	0.760312	0.732845	0.752145
cg05700348	FAM193B	NR_024019	Body	S_Shelf	5	176880756	F	8.38294e-05	0.0278128	0.113561	0.5961	0.630199	0.632965	0.497157	0.517881	0.503543
cg18396403	TMEM184B	NM_012264	3'UTR		22	36945314	R	0.00100518	0.0479603	0.11354	0.539478	0.582432	0.602426	0.438395	0.465546	0.479776
cg25336334					2	190182290	R	0.000274022	0.0334418	0.113528	0.672555	0.709223	0.703815	0.556894	0.5899	0.598214
cg08346210	SCLT1	NM_144643	Body	N_Shelf	4	130231626	R	3.09663e-05	0.0269557	0.113474	0.81238	0.83622	0.828974	0.725613	0.697606	0.713932
cg18409985	ATP11A	NM_015205	Body		13	112561521	R	4.51279e-05	0.0269557	0.113365	0.829348	0.831254	0.857388	0.71279	0.726806	0.738299
cg21328779	PHLDB2	NM_001134438	Body		3	113112565	R	0.000843063	0.0452635	0.113342	0.295441	0.330032	0.265359	0.185511	0.200501	0.164794
cg14297444	DNM1	NM_004408	Body	N_Shelf	9	130018518	R	0.000134782	0.0295456	0.11333	0.750398	0.749672	0.779853	0.625056	0.656127	0.65875
cg05446659	PNPO	NM_018129	3'UTR		17	43381611	R	0.00010468	0.0291071	0.113326	0.608189	0.644068	0.626547	0.502721	0.504522	0.531583
cg26300517					4	38409056	F	0.000451693	0.0374074	0.113237	0.882047	0.881092	0.887871	0.807091	0.745932	0.758277
cg01464104	OR5T1	NM_001004745	TSS200		11	55799616	R	0.00083918	0.0451908	0.113188	0.750489	0.798403	0.788962	0.635884	0.675411	0.686993
cg24470880					13	23177614	R	0.00091298	0.0463037	0.11309	0.619975	0.684102	0.685229	0.549512	0.546787	0.553736
cg08227141	LUZP2	NM_001009909	Body		11	24805833	F	9.35893e-05	0.0284616	0.113028	0.875091	0.907762	0.887863	0.76479	0.796325	0.770518
cg01382072					16	85344778	R	0.000187849	0.0313877	0.113016	0.648365	0.684094	0.700145	0.571228	0.559945	0.562383
cg09900893	RPS6KA1	NM_002953	Body		1	26737963	F	5.61504e-05	0.0269557	0.112991	0.438804	0.471747	0.44272	0.336868	0.34969	0.327739
cg08267399	LOC731779	NR_024441	TSS1500		8	142418342	R	0.000231634	0.0327478	0.112923	0.568409	0.589266	0.55456	0.432175	0.472594	0.468696
cg10976218	RASA3	NM_007368	Body	S_Shore	13	113898863	F	2.73345e-05	0.0269557	0.112867	0.619131	0.636183	0.649997	0.517666	0.516203	0.532842
cg24574546	TMEM9B	NM_020644	3'UTR		11	8925845	R	0.00102237	0.0483223	0.112866	0.788375	0.841856	0.85894	0.72648	0.705451	0.718643
cg09781650					16	64842555	F	1.89099e-05	0.0269557	0.112851	0.799212	0.804496	0.809245	0.694679	0.705371	0.674351
cg02994237	FGF13	NM_001139500	Body		X	137578558	F	3.61056e-05	0.0269557	0.11285	0.752932	0.781311	0.776984	0.670568	0.653481	0.648628
cg17928317	MAGEC3	NM_138702	Body		X	140809944	F	0.000634193	0.0410739	0.112753	0.753181	0.79831	0.812757	0.667238	0.693168	0.665582
cg26584747				S_Shelf	2	5767571	F	0.000881584	0.0456883	0.112749	0.757392	0.825582	0.770088	0.679771	0.671194	0.663851
cg01279413				N_Shore	20	61500938	R	0.000603351	0.0404989	0.112717	0.658754	0.708549	0.722923	0.583467	0.577536	0.591074
cg20923885	2009-09-01	NM_001113492	Body		17	72985205	R	0.00021574	0.0323527	0.11268	0.695588	0.731404	0.714609	0.623752	0.598428	0.581381
cg19139320	MYT1L	NM_015025	Body	N_Shore	2	1874198	R	0.00104035	0.0486095	0.11265	0.526414	0.54362	0.527248	0.441984	0.376912	0.440435
cg03854595				N_Shore	16	11254956	R	0.000128266	0.0292137	0.112645	0.738095	0.75768	0.75825	0.613093	0.649912	0.653086
cg16504661	CAPN14	NM_001145122	TSS1500		2	31295058	F	0.000423136	0.0368308	0.112614	0.828612	0.858939	0.815772	0.742484	0.725919	0.697078
cg16460860				S_Shore	17	17685007	R	0.00060809	0.0405974	0.112612	0.777793	0.753313	0.806181	0.691756	0.652304	0.655391
cg12642651	GAS7	NM_201432	Body		17	9802437	R	1.86966e-05	0.0269557	0.112598	0.822438	0.843719	0.82789	0.722467	0.705151	0.728635
cg08415156	CBFA2T3	NM_175931	5'UTR	N_Shelf	16	87500277	F	4.06294e-05	0.0269557	0.112546	0.930623	0.913864	0.945085	0.830851	0.81192	0.809164
cg00348802	PTPRN2	NM_002847	Body	N_Shore	7	157361727	R	0.000152258	0.0304783	0.112378	0.767914	0.805312	0.7561	0.664413	0.661049	0.666731
cg11473240	KRT31	NM_002277	TSS200		17	36807486	R	5.45082e-05	0.0269557	0.112372	0.776378	0.795039	0.804589	0.679044	0.695019	0.664827
cg24032056					12	74247971	F	0.000421977	0.036813	0.112351	0.83535	0.838129	0.816889	0.72157	0.74535	0.686395
cg21689902	VWA5A	NM_014622	TSS1500		11	123489985	F	1.33965e-05	0.0269557	0.112342	0.354881	0.381238	0.378524	0.263819	0.255151	0.258648
cg05379597	CAMK2G	NM_172173	Body		10	75297150	F	0.000464364	0.0375333	0.112262	0.706806	0.73953	0.708674	0.629911	0.611116	0.577199
cg22862734	FREM2	NM_207361	1stExon	S_Shore	13	38161555	R	3.37441e-05	0.0269557	0.112217	0.82765	0.806177	0.823083	0.705957	0.722063	0.692239
cg26748477				N_Shelf	17	35769941	F	0.00021568	0.0323527	0.112143	0.752038	0.774471	0.790229	0.648044	0.649107	0.683159
cg17804071	PDZRN3	NM_015009	Body		3	73678895	R	2.62024e-05	0.0269557	0.111996	0.785652	0.806323	0.78168	0.683249	0.688359	0.666058
cg13633866					6	149496614	R	0.000709217	0.0425802	0.111966	0.896125	0.858649	0.865758	0.794815	0.748925	0.740894
cg13538299	PTPRN2	NM_002847	Body		7	157159755	R	4.45807e-05	0.0269557	0.111926	0.714585	0.738401	0.717844	0.606413	0.628687	0.599951
cg00323313	EPHB2	NM_004442	Body		1	22927502	F	0.000577779	0.0399757	0.111922	0.539572	0.605484	0.584809	0.462997	0.463748	0.467354
cg18503234	TPCN2	NM_139075	Body	N_Shelf	11	68604415	R	0.000529681	0.0389559	0.111806	0.731924	0.702688	0.746438	0.620744	0.588359	0.636528
cg02420617	FIGNL2	NM_001013690	TSS1500	S_Shore	12	50503825	F	0.000475185	0.0377465	0.111795	0.810339	0.759498	0.764031	0.684201	0.66115	0.653133
cg13552026					9	90559103	F	0.000726137	0.0429327	0.111712	0.67184	0.718405	0.664304	0.567974	0.594949	0.556489
cg19730814	KCNMA1	NM_001161353	Body		10	78749742	R	0.000312176	0.0342828	0.111623	0.766005	0.812114	0.814379	0.696447	0.687958	0.673224
cg26878709	TMEM136	NM_174926	5'UTR	S_Shore	11	119702348	F	0.000664063	0.0416505	0.111588	0.809785	0.805152	0.83196	0.686566	0.685099	0.740467
cg01763692					4	128284231	F	1.98972e-05	0.0269557	0.111583	0.824253	0.844508	0.818095	0.724301	0.720592	0.707213
cg09244312					13	41018657	R	0.000224469	0.0326109	0.111551	0.824977	0.817945	0.860799	0.73517	0.728434	0.705463
cg08552043	KCNQ1	NM_000218	Body	N_Shore	11	2767146	F	0.000440201	0.0371662	0.111544	0.853026	0.866867	0.877661	0.777756	0.721378	0.763788
cg14212012				S_Shelf	3	82943315	R	3.11824e-05	0.0269557	0.111416	0.428523	0.423324	0.413441	0.318982	0.320791	0.291266
cg25729060	MPRIP	NM_201274	3'UTR		17	17029302	F	8.11821e-05	0.0277514	0.111387	0.682314	0.701849	0.671759	0.592768	0.56653	0.562462
cg06439889					6	72134120	R	9.70378e-05	0.0285413	0.111382	0.658344	0.697664	0.665437	0.571522	0.551427	0.564351
cg24387285				S_Shore	22	49090394	R	6.20622e-05	0.0269557	0.111356	0.597979	0.614658	0.635133	0.51384	0.493753	0.506108
cg12036877	BGLAP	NM_199173	TSS200	N_Shelf	1	154478520	F	0.000881394	0.0456883	0.111353	0.54399	0.547851	0.536521	0.472986	0.406884	0.414434
cg10850792					15	87332050	R	4.09449e-06	0.0269557	0.111295	0.754803	0.757014	0.768712	0.651838	0.639997	0.654808
cg01447427	USP21	NM_012475	TSS1500	N_Shore	1	159395191	R	0.000388388	0.0360483	0.111287	0.35597	0.356903	0.391404	0.233352	0.280317	0.256748
cg27635135					7	145026919	F	5.90092e-05	0.0269557	0.111261	0.743637	0.763028	0.767603	0.632838	0.665214	0.642433
cg03346692	C6orf58	NM_001010905	Body		6	127953055	R	0.000437282	0.0371243	0.111173	0.678172	0.729364	0.681913	0.590647	0.595631	0.569653
cg16134515	SLC25A18	NM_031481	Body	S_Shelf	22	16446242	F	7.58278e-06	0.0269557	0.110948	0.71825	0.71728	0.728159	0.597337	0.614949	0.61856
cg19748027					5	154872891	R	0.00027955	0.0334824	0.110936	0.682374	0.709183	0.7064	0.563781	0.613399	0.58797
cg05146852	ANO3	NM_031418	Body		11	26479872	R	6.98442e-05	0.0269557	0.110821	0.775678	0.812512	0.802129	0.693816	0.689747	0.674292
cg12833765	ANTXR1	NM_032208	Body		2	69324382	F	3.42241e-05	0.0269557	0.110776	0.823936	0.848113	0.848169	0.715611	0.733704	0.738574
cg08493762				S_Shelf	21	41144583	R	0.000494655	0.0381067	0.110712	0.779605	0.838848	0.797556	0.693032	0.706468	0.684375
cg17425818	NRP1	NM_001024628	Body		10	33652898	R	0.000324034	0.0344889	0.110691	0.384851	0.403324	0.38588	0.280653	0.30846	0.252868
cg03026004	ARHGAP28	NM_030672	TSS1500		18	6823417	R	7.1411e-05	0.0269557	0.110645	0.761547	0.78832	0.79527	0.684203	0.659705	0.669297
cg01108243	TUBB1	NM_030773	TSS200		20	57027662	F	0.000866775	0.0454824	0.110591	0.341274	0.391296	0.384828	0.287409	0.239911	0.258305
cg06339171	PTPRG	NM_002841	Body		3	61848633	F	0.000568259	0.0397976	0.110354	0.795632	0.764498	0.798077	0.704589	0.65013	0.672427
cg11130630	KCTD10	NM_031954	Body		12	108383472	F	0.000298967	0.0338682	0.110312	0.241478	0.287488	0.279326	0.141241	0.166311	0.169806
cg01567771					14	21261222	F	2.27699e-05	0.0269557	0.110306	0.722014	0.712548	0.729197	0.612487	0.595715	0.624641
cg01360115				S_Shore	22	49090450	R	3.59368e-05	0.0269557	0.110225	0.672805	0.664238	0.673652	0.572818	0.53965	0.567553
cg23243343	KRT80	NM_001081492	Body		12	50865876	R	1.96699e-05	0.0269557	0.110201	0.747943	0.773511	0.744462	0.642099	0.644865	0.648349
cg11729430	CRYGA	NM_014617	TSS200		2	208736723	F	6.98162e-06	0.0269557	0.110187	0.806368	0.814596	0.814848	0.690363	0.701611	0.713278
cg15618210	OPCML	NM_001012393	Body	S_Shelf	11	132322013	R	0.00107358	0.0492027	0.110184	0.741978	0.716187	0.783829	0.620714	0.637912	0.652817
cg00301372					2	139370817	R	0.000238346	0.0327587	0.110019	0.698839	0.735919	0.749798	0.615726	0.611177	0.627597
cg02828779	ACTRT2	NM_080431	TSS1500	N_Shelf	1	2926445	F	6.51901e-05	0.0269557	0.110016	0.820781	0.836905	0.812599	0.73159	0.697645	0.711002
cg08221741	WBSCR17	NM_022479	Body		7	70569706	R	0.00049362	0.0380863	0.10998	0.834358	0.791217	0.787252	0.715609	0.686391	0.680886
cg21655830	C21orf84	NR_026863	TSS1500		21	43723838	R	0.000550342	0.0394202	0.10988	0.637315	0.676423	0.686596	0.576126	0.536264	0.558303
cg15808924	P2RX3	NM_002559	Body	Island	11	56873917	R	0.000697437	0.0423113	0.109875	0.697334	0.753976	0.713948	0.63296	0.599356	0.603317
cg23327334	GRK6	NM_001004106	Body	S_Shore	5	176787910	R	0.000456584	0.0374074	0.109808	0.591457	0.613332	0.652935	0.506728	0.515098	0.506474
cg15909473	HTT	NM_002111	3'UTR		4	3214037	R	0.000397825	0.0361387	0.109738	0.858472	0.898871	0.887289	0.765897	0.796678	0.752842
cg17433678	PFKP	NM_002627	Body		10	3125764	R	0.00020269	0.0320018	0.109733	0.501471	0.544414	0.523165	0.431312	0.40152	0.407019
cg14183540	OSBPL5	NM_020896	5'UTR		11	3131583	R	0.0010019	0.0478897	0.109732	0.820049	0.801353	0.849538	0.735408	0.682318	0.724017
cg24894783	ANKRD33B	NM_001164440	Body		5	10630031	R	0.000168943	0.0308103	0.109732	0.867355	0.836838	0.841775	0.756311	0.743103	0.717359
cg14576347	DFNB31	NM_015404	Body		9	116261912	R	0.000338336	0.0348361	0.109717	0.823824	0.8495	0.871192	0.7189	0.753686	0.742778
cg21330071	GP9	NM_000174	TSS1500		3	130261967	F	0.00032047	0.0344885	0.109715	0.610434	0.611289	0.606956	0.530482	0.472271	0.496779
cg26899005	HCFC1	NM_005334	3'UTR		X	152866334	R	3.09107e-05	0.0269557	0.109712	0.782769	0.809949	0.779447	0.687952	0.676035	0.679041
cg24198944					7	96389173	R	0.000107671	0.0291071	0.10971	0.772376	0.78977	0.764082	0.67092	0.681934	0.644244
cg03922758	CACNA2D3	NM_018398	Body		3	54873729	F	5.55815e-05	0.0269557	0.109708	0.82525	0.840348	0.851939	0.712955	0.743136	0.732322
cg08882099	PDSS2	NM_020381	Body		6	107718700	R	0.000510565	0.0385918	0.109698	0.767357	0.771532	0.77901	0.687808	0.673748	0.627249
cg17633074	GTF2H4	NM_001517	Body	N_Shelf	6	30986843	F	0.000537513	0.0390885	0.109697	0.649081	0.69516	0.694092	0.570417	0.550192	0.588632
cg01663440	RAD52	NM_134424	5'UTR	N_Shelf	12	926357	R	0.000978077	0.0475459	0.109678	0.769277	0.821412	0.817611	0.669542	0.695071	0.71465
cg08462367					8	37287573	R	3.97341e-05	0.0269557	0.10965	0.754418	0.785124	0.78054	0.671536	0.665765	0.653831
cg14284630	OR5T3	NM_001004747	TSS1500		11	55775108	R	0.000858188	0.045434	0.109649	0.756133	0.818765	0.780633	0.695091	0.664559	0.666932
cg01920603	TUBA8	NM_018943	Body	S_Shelf	22	16977945	F	3.03324e-05	0.0269557	0.10955	0.72304	0.734218	0.756968	0.63196	0.629405	0.624212
cg02556071	CARD18	NM_021571	Body		11	104515494	R	0.00059908	0.0403941	0.10954	0.780039	0.833183	0.836871	0.696707	0.708777	0.715988
cg00343063	ZNF213	NM_001134655	Body	N_Shelf	16	3128511	F	0.000585424	0.0400973	0.109522	0.667632	0.698701	0.708975	0.604399	0.554922	0.587421
cg13453847	LOC340094	NR_026994	TSS200		5	5087274	R	0.000567483	0.0397831	0.109509	0.695337	0.738933	0.744203	0.607501	0.638517	0.603927
cg02100381	COL4A2	NM_001846	Body		13	109823712	F	6.57761e-05	0.0269557	0.109493	0.784534	0.781095	0.748224	0.667118	0.654779	0.663477
cg16796107	NHSL2	NM_001013627	Body		X	71279942	R	0.00026797	0.0333192	0.109464	0.786071	0.836884	0.808856	0.713111	0.701427	0.68888
cg19567193	RBPMS2	NM_194272	Body	N_Shore	15	62853284	R	0.000275474	0.0334422	0.10946	0.549521	0.587628	0.575338	0.451392	0.447632	0.485084
cg22014983	MAP4K3	NM_003618	Body		2	39490969	R	0.000683511	0.0420313	0.109449	0.818558	0.842711	0.807905	0.741337	0.683289	0.716202
cg14777908					6	44047663	F	7.47148e-07	0.0269557	0.109376	0.829043	0.830948	0.833202	0.717427	0.722035	0.725602
cg09631769				S_Shore	22	47762890	F	0.000368618	0.035653	0.109363	0.751833	0.796022	0.787903	0.647938	0.683123	0.676609
cg23274984					2	129352800	F	0.00103768	0.0485721	0.109298	0.79257	0.832169	0.802821	0.735484	0.684733	0.67945
cg03846076	STC2	NM_003714	3'UTR		5	172676443	F	0.00065639	0.0414865	0.109254	0.752016	0.712879	0.762613	0.656671	0.628185	0.614888
cg02869444					10	110988750	F	0.000298831	0.0338682	0.109227	0.761933	0.807464	0.758629	0.656564	0.673853	0.669929
cg23861541	EHBP1	NM_015252	5'UTR	S_Shore	2	62787711	F	0.000451833	0.0374074	0.109137	0.809203	0.796034	0.81731	0.726121	0.66762	0.701396
cg05042706	SLC5A9	NM_001011547	Body		1	48476542	F	0.000248361	0.0329185	0.109083	0.711708	0.766756	0.739575	0.632979	0.629951	0.627858
cg24707432	ZNF142	NM_001105537	Body		2	219221799	R	0.000499281	0.0382325	0.108844	0.741954	0.785671	0.757738	0.641324	0.679277	0.638231
cg17638507					11	121788080	F	0.00097418	0.0474672	0.108787	0.791976	0.820258	0.756892	0.7004	0.677396	0.664969
cg22723249					1	229557201	F	0.00057154	0.0398783	0.108756	0.70604	0.677716	0.734518	0.616016	0.588022	0.587968
cg22388347					8	93892968	R	1.96803e-06	0.0269557	0.108726	0.788907	0.777596	0.790263	0.673774	0.68122	0.675595
cg03477332	2007-02-28	NM_001102562	Body	N_Shore	5	16231784	R	0.000556696	0.0395438	0.108592	0.395604	0.371977	0.430148	0.297287	0.274508	0.300157
cg01776172	PKHD1	NM_138694	3'UTR		6	51589867	F	0.000191209	0.0314753	0.108572	0.76615	0.801258	0.775955	0.690995	0.673102	0.653551
cg05462446					16	76131573	F	9.10829e-05	0.0284311	0.108484	0.761033	0.783609	0.761491	0.639737	0.674398	0.666547
cg17175521					1	79400210	F	3.69624e-05	0.0269557	0.108481	0.787956	0.806968	0.77595	0.674594	0.678229	0.69261
cg27358936	LASS3	NM_178842	3'UTR		15	98759197	R	5.62316e-05	0.0269557	0.108472	0.800799	0.81156	0.799493	0.700132	0.711688	0.674615
cg22502382	FGD4	NM_139241	5'UTR		12	32592999	R	8.15637e-05	0.0277514	0.108467	0.81625	0.82519	0.834953	0.73955	0.707926	0.703516
cg18069403	CD200R1L	NM_001008784	TSS1500		3	114048341	F	4.50557e-05	0.0269557	0.108466	0.852397	0.879405	0.87117	0.756403	0.773576	0.747593
cg01671681	PLCH1	NM_014996	5'UTR		3	156904429	F	2.51982e-05	0.0269557	0.108357	0.855727	0.882707	0.866209	0.770736	0.757052	0.751784
cg04304450	BIK	NM_001197	3'UTR		22	41855375	F	0.000493493	0.0380863	0.108326	0.64324	0.630397	0.663497	0.52539	0.518667	0.568101
cg04177287	KCNIP4	NM_147182	5'UTR		4	21466411	R	0.000510616	0.0385918	0.108286	0.750291	0.772347	0.793882	0.667716	0.639072	0.684875
cg17251713	SERPINB7	NM_003784	5'UTR		18	59594018	F	0.000129239	0.0292137	0.108261	0.761391	0.796988	0.798902	0.68524	0.682672	0.664588
cg21523751				N_Shelf	1	181255262	F	0.000808696	0.0445964	0.108242	0.460185	0.473683	0.515308	0.396376	0.357313	0.370762
cg08572513	KIRREL3	NM_001161707	Body		11	125815619	R	0.000515254	0.0386785	0.108136	0.76538	0.78616	0.774003	0.700013	0.659894	0.641228
cg04929612				S_Shelf	8	38631282	R	0.000545718	0.0392674	0.108126	0.638261	0.679814	0.692777	0.56705	0.545357	0.574066
cg10319331	TMEM132B	NM_052907	Body		12	124671657	F	0.000301465	0.0339382	0.108038	0.651181	0.691926	0.671214	0.569438	0.579558	0.541212
cg15184781	ZFHX4	NM_024721	Body		8	77780788	R	0.000266379	0.0333192	0.108011	0.809856	0.821239	0.813169	0.675532	0.720226	0.724473
cg11322432	PLCE1	NM_016341	Body		10	95837661	F	8.80908e-05	0.0280567	0.108001	0.775721	0.742623	0.770362	0.640535	0.658308	0.665861
cg04708601	GRIK2	NM_001166247	Body		6	101986799	R	0.000461076	0.037472	0.107927	0.679058	0.729254	0.728619	0.614795	0.606349	0.592006
cg21049958	CEACAM4	NM_001817	TSS1500		19	46825968	R	5.06154e-05	0.0269557	0.107918	0.862941	0.877401	0.867527	0.769026	0.774342	0.740747
cg08632767					15	23474766	R	0.000315023	0.0343137	0.107873	0.741582	0.785661	0.772313	0.647226	0.67896	0.649752
cg01514353				N_Shelf	22	44638307	R	0.000251858	0.032974	0.107835	0.480747	0.489382	0.531467	0.394556	0.388582	0.394952
cg18998172	SPOCK1	NM_004598	Body		5	136368106	R	3.86244e-05	0.0269557	0.10772	0.761831	0.769857	0.77018	0.66	0.641647	0.67706
cg20695534	HHAT	NM_001170580	Body		1	208617498	F	0.000282241	0.0335596	0.107717	0.831878	0.819646	0.823456	0.748753	0.700598	0.702477
cg14343210					4	114547815	R	0.000921783	0.0464876	0.107692	0.81494	0.871039	0.871538	0.727949	0.752148	0.754344
cg17814814					1	220127299	R	0.000800215	0.0444943	0.107647	0.814102	0.820068	0.840222	0.750556	0.713694	0.6872
cg13996430					2	19605068	F	0.000387634	0.0360479	0.107601	0.841574	0.863239	0.82183	0.745921	0.709849	0.74807
cg26271435					1	203260047	R	0.000353069	0.035355	0.107566	0.615943	0.63398	0.594901	0.523488	0.516014	0.482623
cg11002698	CDK19	NM_015076	Body	N_Shore	6	111241789	R	0.000810549	0.0446364	0.107512	0.452505	0.500411	0.462476	0.388759	0.36276	0.341336
cg04562757	ARHGEF10L	NM_018125	5'UTR		1	17755585	F	7.2706e-05	0.0269557	0.107491	0.755113	0.769822	0.767853	0.66806	0.667922	0.634333
cg06546193					4	188635431	F	4.93356e-05	0.0269557	0.107471	0.762445	0.798076	0.773733	0.67331	0.675224	0.663306
cg09845914				N_Shelf	5	63288549	F	0.00026303	0.0333192	0.107425	0.826228	0.837818	0.823277	0.737393	0.691201	0.736454
cg23169382				N_Shore	X	64170965	F	0.000772363	0.0440025	0.107413	0.730173	0.737764	0.75632	0.633037	0.602943	0.666038
cg27040709	SYT17	NM_016524	Body	N_Shelf	16	19099224	R	5.11982e-05	0.0269557	0.107409	0.736509	0.705457	0.70129	0.609587	0.607404	0.604038
cg04472009	CREB3L2	NM_194071	Body	N_Shelf	7	137334142	R	0.000447375	0.0373577	0.107359	0.847762	0.884672	0.870478	0.749616	0.743081	0.788136
cg10311048					12	27888038	F	5.82798e-05	0.0269557	0.107346	0.86965	0.875675	0.894305	0.758066	0.770956	0.78857
cg12454229				N_Shore	13	110543173	R	0.00040702	0.0363083	0.107315	0.758999	0.800631	0.750221	0.648846	0.675442	0.663617
cg06806638	CHD7	NM_017780	5'UTR	S_Shelf	8	61759414	R	0.000108194	0.0291071	0.107309	0.641754	0.663147	0.636216	0.554811	0.544356	0.520022
cg15036894	FAM134B	NM_001034850	Body		5	16592535	R	0.000160454	0.0307112	0.107281	0.84502	0.874588	0.849691	0.757481	0.76258	0.727393
cg12608975	INPP5A	NM_005539	Body		10	134254863	R	0.000746372	0.0434186	0.107276	0.708929	0.683494	0.668239	0.597016	0.593436	0.548381
cg08338359	NCL	NM_005381	Body		2	232029893	R	0.000662709	0.0416276	0.107233	0.801788	0.839667	0.853382	0.729636	0.702614	0.740887
cg05511530	MGAT4C	NM_013244	5'UTR		12	85175380	F	0.000663641	0.0416505	0.107208	0.833931	0.873892	0.856765	0.748258	0.720915	0.77379
cg23496571	HCK	NM_002110	Body	S_Shelf	20	30108389	R	0.000290823	0.0337564	0.107182	0.84148	0.835107	0.842859	0.760929	0.731392	0.70558
cg25332499	BATF2	NM_138456	3'UTR		11	64512958	F	0.00018112	0.031284	0.107177	0.799389	0.790202	0.797361	0.665934	0.684243	0.715244
cg22675767	ACAP3	NM_030649	Body		1	1224230	F	0.000192207	0.031574	0.107153	0.67059	0.709219	0.697814	0.588892	0.599674	0.567598
cg23715749	GRIK3	NM_000831	Body		1	37186454	F	0.000432127	0.0369637	0.107138	0.672397	0.682584	0.72553	0.599358	0.579547	0.580193
cg23101885	RAD51AP2	NM_001099218	Body		2	17559506	F	0.000270991	0.0334099	0.107067	0.735709	0.774079	0.736461	0.656545	0.623631	0.644873
cg25637952	STK10	NM_005990	Body		5	171423799	F	2.09191e-05	0.0269557	0.107066	0.777997	0.800403	0.800763	0.695734	0.68388	0.678352
cg02650728	C4orf10	NR_015453	Body		4	2912160	F	0.00016586	0.0307475	0.107038	0.885262	0.892892	0.91129	0.768323	0.789709	0.810297
cg16382314	SKI	NM_003036	Body		1	2190822	R	0.000711525	0.0426147	0.107036	0.849571	0.874606	0.872374	0.731122	0.752772	0.791548
cg00890049					6	115999556	F	0.000241019	0.032789	0.107032	0.784786	0.806018	0.822921	0.706961	0.709913	0.675754
cg20825022	CNTNAP5	NM_130773	Body		2	124637115	R	0.000110907	0.029118	0.107021	0.771142	0.746319	0.75057	0.634581	0.670018	0.64237
cg02186141	TBCD	NM_005993	Body	S_Shore	17	78457851	R	1.74246e-05	0.0269557	0.107014	0.657074	0.650921	0.675252	0.549735	0.548926	0.563543
cg26985711	DCN	NM_133507	1stExon		12	90096407	R	0.000371	0.035653	0.106894	0.569742	0.598982	0.590032	0.506854	0.457238	0.473981
cg08966889	TRAM2	NM_012288	Body	N_Shore	6	52548388	F	0.00056928	0.0398064	0.106829	0.55934	0.613846	0.55787	0.473326	0.469539	0.467704
cg10875601	NSD1	NM_022455	3'UTR		5	176656682	R	6.70138e-05	0.0269557	0.106792	0.894349	0.910612	0.900353	0.816086	0.788631	0.780222
cg25204743	KCNQ1	NM_000218	Body		11	2672413	R	0.000120306	0.0291649	0.106731	0.686839	0.640623	0.661934	0.556224	0.558171	0.554808
cg14656153				S_Shore	6	37613948	F	0.000118849	0.0291527	0.106679	0.770493	0.781334	0.787195	0.682837	0.648322	0.687824
cg21776286	PILRB	NM_178238	Body		7	99802234	R	0.000736479	0.0431483	0.106667	0.683482	0.707596	0.739904	0.614441	0.614026	0.582515
cg17693270	DGAT2L6	NM_198512	TSS200		X	69313921	F	2.71856e-05	0.0269557	0.106659	0.453778	0.474444	0.465523	0.352424	0.348475	0.372869
cg16053651	SMOC2	NM_022138	Body		6	168600652	R	0.000238193	0.0327587	0.106604	0.790247	0.776458	0.775173	0.698491	0.647841	0.675734
cg25989783	NCALD	NM_001040625	3'UTR		8	102768662	F	3.69971e-05	0.0269557	0.106451	0.754355	0.773282	0.773933	0.67123	0.644839	0.666149
cg06190732	SERPINA3	NM_001085	TSS200		14	94148389	R	0.000168348	0.0307841	0.106438	0.805089	0.811179	0.767015	0.694161	0.688643	0.681164
cg01904812	RCC2	NM_018715	Body	Island	1	17618927	F	0.000892559	0.0458966	0.10643	0.615681	0.635465	0.633269	0.553752	0.524047	0.487328
cg13876325	PIGL	NM_004278	Body		17	16130823	R	0.000193195	0.0315975	0.106312	0.620409	0.667433	0.660612	0.541456	0.545484	0.542579
cg20695203					13	111133940	R	3.05466e-05	0.0269557	0.106296	0.705955	0.739496	0.720659	0.613627	0.619193	0.6144
cg01564343	TREML1	NM_178174	Body		6	41229898	R	0.000260064	0.0331459	0.10629	0.809963	0.79627	0.834028	0.72187	0.714133	0.685388
cg14334310				S_Shore	14	102628255	R	6.48532e-05	0.0269557	0.106257	0.732861	0.740865	0.755133	0.650513	0.641534	0.618041
cg18526332				N_Shelf	12	108630436	R	5.65482e-05	0.0269557	0.106249	0.785257	0.760345	0.774705	0.678398	0.650007	0.673154
cg02876341	MAML3	NM_018717	Body	S_Shelf	4	141003035	R	0.00037472	0.0358158	0.106247	0.787107	0.793756	0.812942	0.71318	0.662853	0.699031
cg22341513				N_Shelf	18	52936287	R	0.00048583	0.0380395	0.106236	0.664419	0.699362	0.725715	0.591217	0.591642	0.58793
cg11791144	NRG1	NM_013962	Body		8	32248861	R	0.00043886	0.0371243	0.106209	0.694566	0.74429	0.705036	0.593607	0.608183	0.623474
cg16993015				N_Shelf	11	7962719	R	9.48615e-05	0.0284616	0.106195	0.766546	0.783385	0.769235	0.688239	0.663651	0.648691
cg05991539	C6orf25	NM_138274	Body	S_Shore	6	31800344	R	0.000522657	0.0388546	0.106193	0.770365	0.794594	0.756217	0.695641	0.656391	0.650564
cg06229455	DNAJB6	NM_058246	Body	N_Shelf	7	156882482	R	3.41945e-05	0.0269557	0.106184	0.818366	0.818169	0.834813	0.723615	0.728305	0.700878
cg15232319	SH3GL1	NM_003025	Body		19	4327459	R	7.6253e-05	0.0273442	0.106174	0.480821	0.485265	0.481539	0.39892	0.358007	0.372176
cg24875808	AGBL1	NM_152336	Body		15	84543915	R	2.01688e-05	0.0269557	0.106123	0.827145	0.850809	0.824567	0.733912	0.72706	0.723182
cg18512262	OR56A1	NM_001001917	TSS1500		11	6006305	R	0.000131381	0.029413	0.106104	0.784137	0.80977	0.823651	0.685669	0.706471	0.707107
cg22357679	SORCS2	NM_020777	Body	S_Shelf	4	7537672	R	1.62563e-06	0.0269557	0.106085	0.53199	0.534533	0.53481	0.428972	0.433615	0.420491
cg20333945					2	144845749	F	4.37147e-05	0.0269557	0.106035	0.795051	0.828784	0.805273	0.697741	0.702659	0.710603
cg11987596	ODZ4	NM_001098816	5'UTR		11	78481320	R	3.74694e-05	0.0269557	0.106021	0.811775	0.846911	0.829878	0.720252	0.723857	0.726393
cg05223210	DSCAML1	NM_020693	Body		11	117135607	R	6.42225e-05	0.0269557	0.106019	0.703835	0.734031	0.735151	0.608364	0.619488	0.627107
cg15298486	BLOC1S2	NM_173809	TSS1500	S_Shore	10	102036680	F	0.000221523	0.0325755	0.105964	0.627219	0.624124	0.648749	0.530165	0.503718	0.548316
ch.19.21460585R				S_Shore	19	21460585	F	0.000876581	0.0456332	0.10593	0.297158	0.268103	0.238421	0.170456	0.174652	0.140783
cg14706739	EPB49	NM_001114135	5'UTR	S_Shore	8	21972301	R	0.000489504	0.0380412	0.105879	0.807154	0.814317	0.805668	0.734682	0.700799	0.67402
cg12800915	CORO2A	NM_052820	5'UTR	N_Shore	9	99992450	R	0.000268036	0.0333192	0.105858	0.74628	0.740557	0.748375	0.658801	0.650232	0.608606
cg18226915					11	125515040	R	5.94719e-05	0.0269557	0.10584	0.791767	0.809897	0.775042	0.695171	0.687282	0.676732
cg11145826	HDDC3	NM_198527	TSS1500	N_Shore	15	89278077	R	0.000599404	0.0403941	0.105813	0.778715	0.781279	0.806625	0.669692	0.664164	0.715324
cg15729649	BICC1	NM_001080512	Body		10	60172983	F	0.000214134	0.0323527	0.105798	0.815006	0.831769	0.845637	0.702963	0.74447	0.727586
cg23400715	FAM19A5	NM_001082967	Body		22	47279288	R	5.95445e-05	0.0269557	0.105742	0.765858	0.79521	0.793695	0.691581	0.673542	0.672414
cg09754932				N_Shelf	1	109622046	F	2.24444e-05	0.0269557	0.105736	0.681345	0.705346	0.686793	0.586651	0.594268	0.575358
cg10219789	PRKCZ	NM_001033581	Body		1	2082386	R	0.000273804	0.0334418	0.105733	0.764664	0.811455	0.778846	0.682261	0.69038	0.665123
cg21961852	RHEB	NM_005614	Body		7	150838019	R	0.000109501	0.029118	0.105703	0.71877	0.718365	0.732876	0.631582	0.593599	0.627723
cg03935060	GRIN2A	NM_001134407	Body	N_Shore	16	10179522	R	0.00078242	0.0442188	0.105645	0.849041	0.877717	0.827346	0.770261	0.740641	0.726268
cg05246110	SAPS3	NM_001164161	5'UTR		11	67995519	F	0.00026812	0.0333192	0.105629	0.670961	0.689631	0.682949	0.571539	0.552412	0.602704
cg07631435	ZBTB16	NM_006006	Body		11	113549113	R	5.63019e-06	0.0269557	0.105582	0.357976	0.372361	0.372142	0.270083	0.258346	0.257305
cg17129262	MDFI	NM_005586	Body	N_Shelf	6	41725781	R	0.000243395	0.0328065	0.105435	0.710664	0.744293	0.758643	0.634422	0.621809	0.641063
cg05600609	ODZ2	NM_001122679	Body		5	167248368	R	2.9809e-06	0.0269557	0.105431	0.811844	0.810837	0.821099	0.715218	0.710264	0.702006
cg14392755	FAM22G	NM_001170741	Body		9	98736342	F	0.000100629	0.0288336	0.105359	0.840552	0.880566	0.875561	0.756964	0.761105	0.762531
cg09547314	PTPRS	NM_130855	Body	S_Shore	19	5202120	R	4.02789e-05	0.0269557	0.105302	0.823453	0.849684	0.836944	0.742597	0.733337	0.718242
cg01059768	CDH22	NM_021248	Body	N_Shore	20	44307974	R	0.000847189	0.045285	0.105272	0.764285	0.789583	0.763982	0.63917	0.700392	0.662472
cg00515455	SPACA1	NM_030960	Body	S_Shelf	6	88818089	R	0.00106915	0.0491639	0.105268	0.654917	0.708097	0.689842	0.583065	0.600374	0.553613
cg00868860	DCD	NM_053283	Body		12	53328215	R	0.000461935	0.0375132	0.105248	0.787053	0.801141	0.813888	0.669588	0.693225	0.723526
cg04431788	CCRL1	NM_178445	TSS1500		3	133800501	F	2.68608e-05	0.0269557	0.105203	0.690921	0.67376	0.666212	0.579244	0.559956	0.576083
cg11677744	SH3BP4	NM_014521	5'UTR	S_Shore	2	235528328	F	0.000493218	0.0380853	0.105197	0.794981	0.847964	0.800472	0.719992	0.703449	0.704385
cg26427534	PPFIBP2	NM_003621	Body		11	7615643	R	0.000379133	0.035933	0.105101	0.764874	0.806499	0.777231	0.678498	0.696894	0.657907
cg27574973	MAGI2	NM_012301	Body		7	78056382	R	0.000716667	0.0426981	0.105033	0.78597	0.838672	0.787828	0.714264	0.686975	0.696132
cg07535316	CACNA2D1	NM_000722	Body		7	81590630	R	0.000883221	0.0457193	0.104984	0.719235	0.726492	0.729787	0.630553	0.582227	0.647782
cg26488544					11	105856807	F	0.00103361	0.0485169	0.104971	0.760575	0.783939	0.767897	0.676676	0.692543	0.628278
cg21159068				N_Shore	1	229362533	R	0.000145122	0.0301341	0.104826	0.263739	0.280511	0.279664	0.147586	0.171	0.190849
cg14423881	C7orf69	NM_025031	Body		7	47825133	R	0.000580318	0.0400254	0.104802	0.782308	0.828756	0.815574	0.722256	0.708066	0.681912
cg00673685	ZCCHC16	NM_001004308	3'UTR		X	111585847	R	0.000729162	0.0430209	0.104745	0.706104	0.757284	0.766736	0.637123	0.644142	0.634626
cg20303331	PIP4K2B	NM_003559	Body		17	34199101	R	0.000982403	0.0476392	0.104712	0.640082	0.665604	0.682221	0.544994	0.589975	0.538802
cg10320783	CADM1	NM_001098517	Body		11	114603140	F	5.17075e-06	0.0269557	0.104681	0.819674	0.836096	0.833987	0.725154	0.719901	0.730659
cg02341119	MGAT5B	NM_144677	Body	Island	17	72378074	F	3.55159e-06	0.0269557	0.104679	0.262003	0.262353	0.271936	0.16459	0.15238	0.165285
cg15182222	PPFIBP2	NM_003621	Body		11	7562246	R	0.000147718	0.0302148	0.104673	0.826146	0.855634	0.843977	0.72374	0.758252	0.729748
cg11979420				S_Shelf	1	164406620	R	5.72628e-05	0.0269557	0.104645	0.743947	0.777338	0.773572	0.666825	0.659517	0.654581
cg03783110	PITPNA	NM_006224	Body	N_Shore	17	1410489	F	0.000320293	0.0344885	0.104629	0.82064	0.864827	0.848152	0.758174	0.725764	0.735793
cg11129341	NAV2	NM_182964	Body		11	19827337	F	0.000201276	0.0320018	0.104591	0.835853	0.86626	0.858414	0.735517	0.771528	0.739709
cg13099374	POU2F1	NM_002697	Body		1	165637629	R	6.08147e-05	0.0269557	0.104551	0.760482	0.794295	0.793326	0.681994	0.676288	0.676168
cg27178677	PLCB1	NM_015192	Body		20	8782803	R	2.79368e-06	0.0269557	0.104526	0.748804	0.742381	0.752679	0.636304	0.644775	0.649209
cg00903452	BTBD16	NM_144587	Body		10	124036976	F	2.4657e-05	0.0269557	0.104522	0.793747	0.809201	0.791349	0.707422	0.690478	0.682833
cg23411426					8	37075143	R	0.000336887	0.0348137	0.104506	0.741138	0.767041	0.746712	0.653251	0.668007	0.620114
cg15701210	LILRA1	NM_006863	TSS1500		19	59796416	R	3.81182e-05	0.0269557	0.1045	0.80681	0.84088	0.826915	0.724496	0.720016	0.716592
cg09446806					2	134193768	R	0.000297179	0.0338357	0.104463	0.707879	0.731915	0.759411	0.63428	0.633379	0.618157
cg18836485	RNASE1	NM_198234	1stExon		14	20340858	F	0.000622936	0.040773	0.104454	0.805913	0.840928	0.833698	0.74058	0.73389	0.692706
cg18648031				S_Shelf	3	129813253	R	0.000339577	0.0348724	0.104426	0.654122	0.671184	0.694898	0.571615	0.548572	0.586738
cg26926765	C6orf142	NM_138569	Body		6	54235308	F	0.000609773	0.0405984	0.104409	0.711377	0.750905	0.701284	0.635084	0.615687	0.599568
cg11588903	MYO9B	NM_004145	5'UTR	N_Shelf	19	17069493	R	0.000185218	0.0313812	0.104373	0.676511	0.706166	0.685896	0.607683	0.575235	0.572535
cg21769093	VWC2	NM_198570	Body	S_Shelf	7	49790235	R	0.000596489	0.0403941	0.10429	0.651853	0.704523	0.67997	0.580363	0.58805	0.555065
cg14818960	FOLR1	NM_000802	5'UTR		11	71580767	F	1.27361e-05	0.0269557	0.104289	0.870297	0.880605	0.866526	0.780459	0.765807	0.758294
cg01793320	SLC18A1	NM_001142324	Body		8	20075059	R	2.08219e-06	0.0269557	0.104281	0.79081	0.801976	0.790065	0.690679	0.692667	0.68666
cg15942368					7	138769509	R	0.000585759	0.0400973	0.10427	0.84388	0.884662	0.84099	0.774546	0.744964	0.737213
cg10440524	NRG3	NM_001165972	Body		10	83718237	R	0.000403449	0.036217	0.104254	0.711026	0.753969	0.729803	0.631023	0.644749	0.606264
cg05229416	EPHB2	NM_004442	Body	Island	1	22983710	R	0.000485785	0.0380395	0.104228	0.739918	0.785163	0.780469	0.64874	0.661557	0.68257
cg23584735	PINX1	NM_017884	Body		8	10723431	F	0.000149927	0.0303451	0.104212	0.852582	0.885765	0.890501	0.785152	0.767271	0.763788
cg18369972	GAS7	NM_201433	Body		17	9880846	F	0.000804264	0.0445194	0.104105	0.769548	0.791356	0.807635	0.711113	0.688612	0.656499
cg07243147	ACCN3	NM_020322	TSS1500	N_Shore	7	150375207	R	0.000641219	0.0411481	0.104092	0.433613	0.443405	0.45606	0.306006	0.354045	0.360752
cg25818109	MASP1	NM_001879	3'UTR		3	188420348	R	0.000380153	0.0359427	0.104048	0.654806	0.709841	0.685829	0.575743	0.588236	0.574353
cg05707788				N_Shore	21	45989865	F	0.000134187	0.0295296	0.104001	0.786251	0.810505	0.791977	0.674644	0.689332	0.712755
cg09006487	RYBP	NM_012234	3'UTR		3	72507672	R	6.07491e-05	0.0269557	0.103918	0.340952	0.331982	0.350312	0.21746	0.247746	0.246285
cg25574603	GSG1	NM_001080554	TSS200	S_Shelf	12	13148033	F	0.000256715	0.0330181	0.103881	0.755218	0.801794	0.798965	0.684746	0.677766	0.681823
cg12201167					12	96672594	F	1.45735e-05	0.0269557	0.103697	0.822099	0.822931	0.831497	0.736399	0.716354	0.712683
cg01794245	KIAA1688	NM_025251	TSS1500		8	145810267	R	0.000558391	0.0395885	0.103693	0.785672	0.837653	0.786796	0.703171	0.69	0.70587
cg15359093					2	66747864	F	0.000145442	0.0301341	0.103684	0.815402	0.825273	0.803573	0.695968	0.734604	0.702623
cg19139832	CPNE4	NM_130808	5'UTR		3	133114531	R	0.000161287	0.0307112	0.103684	0.740256	0.772941	0.742455	0.648429	0.663422	0.63275
cg04095070	VAT1L	NM_020927	Body		16	76480654	R	0.000289256	0.033725	0.103613	0.814321	0.819225	0.798604	0.686028	0.701028	0.734255
cg05289983					7	112877238	R	5.93223e-05	0.0269557	0.103551	0.811401	0.849058	0.832574	0.727663	0.730845	0.723872
cg17202013	NELL2	NM_001145110	Body	S_Shelf	12	43559148	F	0.00020704	0.0321999	0.103537	0.777277	0.795194	0.817212	0.687338	0.681532	0.710202
cg15357118	UGGT1	NM_020120	Body		2	128644442	F	0.000338588	0.034844	0.103514	0.801878	0.812853	0.825693	0.73872	0.698759	0.692403
cg03237868	SPATA18	NM_145263	Body	S_Shore	4	52614671	R	0.000334153	0.0347758	0.103473	0.760086	0.787794	0.770409	0.641723	0.681816	0.68433
cg05659486					6	53900648	R	0.00022233	0.0325755	0.103464	0.864502	0.835604	0.855322	0.750062	0.726809	0.768164
cg17962384	KCNIP2	NM_173195	Body	N_Shore	10	103591178	F	6.16782e-06	0.0269557	0.103446	0.142616	0.138208	0.151099	0.0456452	0.0453062	0.0306348
cg10436631	RPH3AL	NM_006987	Body	N_Shelf	17	96433	F	7.24645e-05	0.0269557	0.103396	0.805118	0.813031	0.80986	0.697375	0.728393	0.692053
cg00312809	PRKCZ	NM_002744	Body	S_Shore	1	2018073	R	2.52601e-05	0.0269557	0.103385	0.765129	0.794877	0.788544	0.680823	0.679655	0.677917
cg00170295	LOC100287718	NM_001162435	Body		6	46828329	F	0.000382698	0.0360091	0.10338	0.776855	0.827114	0.783384	0.68429	0.6927	0.700224
cg21137557	LVRN	NM_173800	Body		5	115342350	R	6.89507e-05	0.0269557	0.103197	0.832861	0.840805	0.811986	0.74017	0.715868	0.720024
cg06112171					6	40432476	R	5.87948e-05	0.0269557	0.103195	0.694988	0.731096	0.712269	0.612539	0.613705	0.602525
cg01585180	FAT1	NM_005245	Body		4	187865020	R	1.23678e-05	0.0269557	0.103173	0.75237	0.758573	0.757699	0.661185	0.659489	0.638448
cg09530108	CRIM1	NM_016441	Body	S_Shore	2	36440214	F	0.000759526	0.0437115	0.103101	0.768937	0.804484	0.809407	0.718985	0.675833	0.678707
cg26899012					5	86078305	R	0.000216984	0.0324106	0.103079	0.664131	0.699896	0.703141	0.595651	0.590992	0.571288
cg23710945					8	93546713	F	4.20466e-05	0.0269557	0.10307	0.820558	0.850115	0.830796	0.733093	0.720499	0.738668
cg01902758	ST5	NM_213618	5'UTR		11	8773004	R	0.000507605	0.0385084	0.103068	0.718803	0.766944	0.758316	0.628469	0.646708	0.659683
cg27259235					6	98672666	F	0.000191077	0.0314667	0.103054	0.757519	0.799523	0.7718	0.672427	0.685704	0.661548
cg16658473	SHISA9	NM_001145204	Body	S_Shore	16	12906371	F	0.00070543	0.0424624	0.103026	0.701273	0.710439	0.750689	0.606227	0.607902	0.639196
cg04599612	SLC2A7	NM_207420	TSS200		1	9009172	R	0.000295362	0.0337983	0.103023	0.79935	0.840484	0.834707	0.715895	0.738927	0.710649
cg07418387	FMN2	NM_020066	Body	S_Shelf	1	238442087	F	0.000315393	0.0343137	0.102873	0.740446	0.762107	0.751177	0.636247	0.677064	0.631801
cg23075139	LSAMP	NM_002338	3'UTR		3	117006721	R	6.47423e-05	0.0269557	0.102811	0.841843	0.839037	0.838754	0.754717	0.71642	0.740063
cg18393511	FAT2	NM_001447	Body	N_Shelf	5	150889048	R	0.000185829	0.0313812	0.102759	0.823979	0.845099	0.856024	0.753782	0.718832	0.744209
cg03114584				N_Shore	4	1505116	F	0.000264071	0.0333192	0.102731	0.618201	0.659625	0.647005	0.537076	0.555001	0.524562
cg00390253	SLC38A3	NM_006841	TSS1500	N_Shore	3	50216304	F	0.000224682	0.0326183	0.102698	0.758874	0.802695	0.792561	0.69333	0.672188	0.680517
cg06924602	SBSN	NM_001166034	Body		19	40708901	F	0.00049184	0.0380853	0.102678	0.788166	0.815144	0.826253	0.700457	0.732172	0.6889
cg16274890	TPRA1	NM_001142646	5'UTR		3	128782015	R	0.000154384	0.0305139	0.102675	0.49943	0.510548	0.535522	0.410993	0.427478	0.399004
cg03411938	KCNQ1	NM_000218	Body		11	2656579	F	1.16999e-05	0.0269557	0.102622	0.632367	0.622224	0.641837	0.534705	0.533825	0.520032
cg06807905	KCNC4	NM_001039574	3'UTR		1	110578069	R	0.000291328	0.0337564	0.10261	0.829271	0.864666	0.87576	0.766648	0.748734	0.746485
cg16764362	JPH3	NM_020655	Body		16	86240175	R	0.000172902	0.030852	0.10259	0.72169	0.75607	0.737567	0.617933	0.650709	0.638915
cg05614028				N_Shore	18	43039756	F	3.75013e-05	0.0269557	0.102577	0.741252	0.75883	0.741155	0.638249	0.635005	0.660251
cg09869595	SLC5A9	NM_001011547	Body		1	48476312	F	3.67785e-05	0.0269557	0.102493	0.853933	0.855005	0.881602	0.754136	0.761676	0.767248
cg03489427					8	119959351	F	0.000572639	0.0398845	0.102446	0.819855	0.877862	0.83335	0.736761	0.744907	0.742062
cg14117934	IL1B	NM_000576	3'UTR		2	113304146	R	0.000215285	0.0323527	0.102421	0.854079	0.839094	0.856426	0.736146	0.732111	0.77408
cg04569233	CX3CR1	NM_001171174	Body		3	39296453	F	0.000575272	0.0399312	0.102404	0.781341	0.776749	0.809717	0.715563	0.674213	0.670818
cg04391666				N_Shelf	11	122675463	F	0.000716896	0.0426981	0.102399	0.756241	0.812649	0.803649	0.677665	0.689001	0.698678
cg19747968	NTM	NM_001144059	Body		11	131445769	R	0.000194372	0.0315981	0.102368	0.692558	0.717512	0.73263	0.614721	0.596948	0.623926
cg27312203	PRKAR1B	NM_001164759	Body	Island	7	598477	F	0.000341629	0.0349208	0.102364	0.824458	0.787946	0.784582	0.707808	0.704213	0.677873
cg16550446				S_Shelf	22	46408868	R	0.000207105	0.0321999	0.102361	0.77744	0.801443	0.753904	0.66909	0.682813	0.673799
cg11708358	LRP11	NM_032832	Body	N_Shore	6	150225209	R	1.01849e-05	0.0269557	0.10236	0.698272	0.720021	0.715844	0.611481	0.611382	0.604194
cg08278002					16	62204766	R	3.34955e-05	0.0269557	0.102349	0.815599	0.832118	0.831858	0.708795	0.728929	0.734805
cg07946260	PTPRV	NR_002930	Body		1	200420242	F	3.82191e-05	0.0269557	0.102347	0.800773	0.795426	0.819825	0.694785	0.698265	0.715934
cg07125771	FHOD1	NM_013241	Body	N_Shore	16	65828094	R	0.000431277	0.0369637	0.102336	0.418277	0.424018	0.442029	0.344218	0.337134	0.295964
cg04744713	FLJ43860	NM_207414	TSS200		8	142586622	R	0.000252894	0.032974	0.102335	0.784281	0.801253	0.832322	0.713011	0.701572	0.696269
cg22950223					7	1370154	R	0.000757247	0.0436491	0.102324	0.656923	0.695305	0.674083	0.57172	0.599884	0.547736
cg06811732					1	217816292	R	0.000363071	0.0355752	0.1023	0.719705	0.77264	0.752057	0.645905	0.637897	0.653701
cg11929154	PLXNA1	NM_032242	Body	Island	3	128235531	F	4.40783e-06	0.0269557	0.102283	0.779994	0.779172	0.775144	0.684752	0.676144	0.666565
cg03020863	PDGFD	NM_025208	Body		11	103510854	R	0.000394717	0.0361224	0.102212	0.398357	0.413579	0.395787	0.32287	0.271	0.307215
cg18023455	VWC2	NM_198570	Body		7	49865210	F	0.000543073	0.0392197	0.10218	0.746974	0.736192	0.74331	0.605885	0.653699	0.660351
cg01428071	PHIP	NM_017934	Body	N_Shore	6	79842492	R	1.328e-05	0.0269557	0.102166	0.774644	0.771443	0.785599	0.666112	0.687146	0.671929
cg19786983					15	86137655	R	0.000326999	0.0346243	0.102134	0.711676	0.665426	0.664539	0.577395	0.575586	0.582257
cg06866553				N_Shelf	12	130507379	R	0.000262449	0.0332912	0.10208	0.704499	0.747416	0.713709	0.617765	0.63345	0.608169
cg08414647	GPR156	NM_153002	TSS1500		3	121446620	F	0.000285814	0.0336218	0.102065	0.713438	0.755353	0.761036	0.636528	0.645853	0.641251
cg18387985					11	15306701	R	1.21627e-05	0.0269557	0.10205	0.792029	0.815419	0.807708	0.705293	0.70616	0.697552
cg07826516					5	3159230	F	5.90376e-05	0.0269557	0.102014	0.736795	0.727018	0.70696	0.62898	0.608833	0.626919
cg19235071					6	114997967	R	0.000424542	0.0368308	0.101859	0.754724	0.771292	0.776076	0.686608	0.6739	0.636006
cg13929658					12	6174989	F	0.000386101	0.0360479	0.101839	0.737201	0.761477	0.777306	0.634362	0.66852	0.667583
cg02417473				N_Shore	22	36764125	F	6.28187e-05	0.0269557	0.10183	0.722288	0.749132	0.751817	0.628011	0.645959	0.643778
cg20799165	LOC286094	NR_026706	Body		8	136371336	R	7.17005e-05	0.0269557	0.101821	0.754673	0.789293	0.760336	0.673175	0.660869	0.664793
cg04724807					14	61466058	F	1.80329e-05	0.0269557	0.101775	0.847353	0.842674	0.858557	0.759531	0.736388	0.747338
cg12386297	LOC642587	NM_001104548	Body		1	207671846	R	0.000111992	0.029118	0.101761	0.805633	0.836841	0.821127	0.736054	0.707178	0.715088
cg08707476				N_Shelf	1	108900898	R	2.30705e-05	0.0269557	0.10176	0.803148	0.800905	0.825951	0.713488	0.709379	0.701856
cg00688941					8	40017548	F	0.000126204	0.0292137	0.101746	0.795346	0.836259	0.817293	0.711464	0.724109	0.708089
cg02110836				S_Shelf	17	69464678	R	6.9628e-05	0.0269557	0.101736	0.709381	0.729054	0.744336	0.617347	0.634264	0.625952
cg05941819	TMEM39B	NM_018056	3'UTR		1	32340992	F	0.000142075	0.0300605	0.101724	0.868644	0.885095	0.898782	0.764503	0.784608	0.798238
cg00620976					16	64170396	F	0.000602829	0.0404982	0.101699	0.695266	0.737326	0.739798	0.608868	0.642594	0.61583
cg16575319					5	172179601	F	0.000259271	0.0330963	0.101692	0.841769	0.883853	0.839861	0.750101	0.761261	0.749046
cg25599739	UBR4	NM_020765	Body		1	19275720	R	0.000548319	0.0393605	0.101683	0.84503	0.876133	0.840638	0.757415	0.772303	0.727034
cg19690879	TM2D3	NM_025141	Body	N_Shelf	15	100007286	R	0.000403743	0.036217	0.101634	0.86192	0.909108	0.905524	0.802473	0.785569	0.783609
cg05971934					15	86108926	R	0.000115735	0.0291527	0.101553	0.779332	0.811609	0.794501	0.700695	0.703157	0.676933
cg00582628	RGS20	NM_170587	1stExon		8	54927068	R	0.000342771	0.0349682	0.101493	0.61173	0.641434	0.658732	0.551203	0.528025	0.528191
cg21216220	ACACA	NM_198839	5'UTR		17	32807058	R	5.82111e-05	0.0269557	0.101481	0.813616	0.839691	0.823133	0.724411	0.736952	0.710635
cg10082515					7	109586012	F	0.000228939	0.0327462	0.101472	0.808996	0.786601	0.797373	0.72141	0.678609	0.688535
cg20456243	SPEG	NM_005876	Body	S_Shelf	2	220060720	R	0.000161273	0.0307112	0.101465	0.723176	0.729011	0.756886	0.624854	0.628044	0.651782
cg12305074	MAGI2	NM_012301	Body		7	78206692	F	0.000492769	0.0380853	0.1014	0.846371	0.844135	0.796767	0.736199	0.728229	0.718644
cg13930557	ABCA2	NM_001606	Body	N_Shore	9	139025330	F	0.000128445	0.0292137	0.101394	0.864211	0.857162	0.856081	0.780934	0.737933	0.754405
cg15484033					3	86307017	R	0.00084812	0.0453001	0.101331	0.684923	0.744819	0.701397	0.608635	0.598252	0.620257
cg19506435	PPP2R2C	NM_020416	Body	N_Shelf	4	6520250	F	0.00106119	0.0489643	0.10133	0.748153	0.741329	0.770769	0.6227	0.684071	0.64949
cg10954944					3	185860311	R	0.000824551	0.044846	0.101317	0.779724	0.809083	0.817859	0.676101	0.727638	0.698976
cg21211882	EPB41L1	NM_012156	Body		20	34233819	R	0.000818721	0.0447819	0.101316	0.485411	0.535512	0.476548	0.389548	0.401848	0.402129
cg22272888	SCARA5	NM_173833	TSS1500		8	27906691	R	0.000786491	0.0442779	0.101203	0.788082	0.772615	0.743385	0.665676	0.64446	0.690337
cg10482356	GNAO1	NM_020988	Body		16	54885922	R	0.000366268	0.035653	0.10114	0.861855	0.831319	0.853026	0.763757	0.721766	0.757257
cg07427642	COL23A1	NM_173465	Body	N_Shore	5	177876904	F	0.000412265	0.0364559	0.101109	0.828287	0.802382	0.797673	0.734659	0.697209	0.693146
cg24524470	EFCAB2	NR_026587	Body		1	243339880	R	0.000334346	0.0347758	0.101104	0.79429	0.794613	0.791456	0.68539	0.722089	0.669568
cg05358758	KRT71	NM_033448	TSS200		12	51233271	R	0.000161353	0.0307112	0.101085	0.825401	0.82906	0.817627	0.748664	0.70759	0.712579
cg21650861	TPRA1	NM_001142646	5'UTR		3	128782158	R	0.000423346	0.0368308	0.101073	0.66756	0.674415	0.69866	0.553172	0.597683	0.586561
cg00356208					16	53725082	F	0.000872799	0.0455971	0.100971	0.592001	0.629603	0.585577	0.512165	0.516813	0.47529
cg23049823	MTNR1B	NM_005959	3'UTR		11	92355287	F	0.000163874	0.0307284	0.100964	0.765992	0.808111	0.771343	0.682934	0.676736	0.682885
cg13457462					8	49964525	F	0.000554324	0.0394699	0.100961	0.648681	0.686312	0.670609	0.58661	0.574413	0.541694
cg02797933					6	169571874	F	1.02007e-05	0.0269557	0.100959	0.746017	0.759508	0.758781	0.648551	0.648319	0.664558
cg22214800					11	113051471	F	4.60639e-05	0.0269557	0.100956	0.799813	0.815504	0.795128	0.716279	0.688402	0.702896
cg02943456					8	33986136	F	5.09903e-05	0.0269557	0.100942	0.716124	0.730172	0.717259	0.603782	0.636134	0.62081
cg27091343	TRIM15	NM_033229	TSS1500		6	30238205	R	6.38624e-05	0.0269557	0.100887	0.777293	0.775642	0.753596	0.683237	0.662895	0.657738
cg24892473	DLG2	NM_001142699	Body		11	82956322	F	5.06261e-05	0.0269557	0.100876	0.829765	0.858148	0.861558	0.744471	0.752412	0.74996
cg02281854					2	217136370	F	3.88196e-05	0.0269557	0.100868	0.821278	0.813573	0.819895	0.735161	0.702998	0.713983
cg02295341					16	76266773	F	9.29697e-05	0.0284616	0.100799	0.694756	0.659011	0.678458	0.585299	0.565677	0.578852
cg14741236					5	171917959	R	0.000191958	0.0315725	0.100778	0.814733	0.832504	0.851007	0.718109	0.72889	0.748913
cg21597304				S_Shelf	15	24572414	R	0.000276548	0.0334422	0.100777	0.767447	0.811725	0.80392	0.687729	0.687346	0.705687
cg13567299	GDPD5	NM_030792	5'UTR		11	74879333	F	0.000407541	0.0363466	0.100767	0.735718	0.775989	0.783944	0.674785	0.665376	0.65319
cg05339605	TTC7B	NM_001010854	Body		14	90339614	F	0.000289128	0.033725	0.100746	0.79302	0.800256	0.83147	0.709954	0.690197	0.722356
cg26538442	CES3	NM_024922	TSS200		16	65552448	R	0.000859902	0.045434	0.10066	0.830673	0.843404	0.876845	0.745946	0.729355	0.773641
cg09909740					14	55295217	F	0.00035354	0.035355	0.100646	0.828011	0.839428	0.846938	0.741674	0.710194	0.760573
cg18930012	LRIT1	NM_015613	TSS1500	S_Shelf	10	85991398	R	5.77119e-05	0.0269557	0.100614	0.696282	0.705759	0.705913	0.585714	0.620608	0.599791
cg13626140					5	91060717	R	0.000394695	0.0361224	0.100608	0.813736	0.803655	0.833739	0.742841	0.707131	0.699336
cg18401376					6	35249110	R	0.000366016	0.035653	0.10056	0.766947	0.73061	0.763853	0.632008	0.665818	0.661904
cg04037905	PDLIM1	NM_020992	Body	N_Shelf	10	97037057	R	2.32744e-05	0.0269557	0.100559	0.870289	0.89566	0.87161	0.7822	0.774231	0.779451
cg03796381					15	34437325	R	0.000220657	0.0325755	0.100533	0.565328	0.580818	0.5377	0.448313	0.463556	0.470376
cg22042348				S_Shelf	8	133564806	F	0.00100489	0.0479603	0.10049	0.6373	0.698622	0.654462	0.549522	0.570299	0.569094
cg18966810					2	134085165	R	0.00108143	0.0493125	0.100481	0.840197	0.891597	0.851054	0.772809	0.772296	0.7363
cg22609908				N_Shelf	12	729020	F	1.04671e-05	0.0269557	0.100477	0.484044	0.483704	0.488989	0.382037	0.375307	0.397962
cg25013586	ZBTB12	NM_181842	Body	Island	6	31975894	R	2.31687e-05	0.0269557	0.100475	0.861704	0.847572	0.855257	0.760302	0.739449	0.763357
cg12797522	TDRG1	NR_024015	Body		6	40455453	R	0.000340226	0.0348934	0.100394	0.780105	0.812948	0.807512	0.71898	0.701895	0.678507
cg17741799					8	875656	R	0.000904986	0.0461434	0.100313	0.813438	0.849084	0.82672	0.697657	0.746813	0.743834
cg15192120	PTPRN2	NM_002847	Body		7	157318937	R	0.000795696	0.0444035	0.100306	0.7351	0.790384	0.751886	0.644109	0.674032	0.658311
cg11941420	CRYBA4	NM_001886	TSS200		22	25347904	F	0.000244868	0.0328065	0.10024	0.747813	0.786127	0.78008	0.65571	0.683855	0.673734
cg19431495	EXOC3	NM_007277	Body		5	507456	R	0.000292784	0.0337564	0.100207	0.767651	0.791044	0.799374	0.692467	0.701783	0.663198
cg15393585					17	76889904	F	0.0006997	0.042342	0.100201	0.747121	0.780618	0.808739	0.6735	0.681743	0.680631
cg24146714	PVT1	NR_003367	Body		8	129143059	R	0.00055431	0.0394699	0.100201	0.836104	0.830594	0.843318	0.750465	0.755823	0.703125
cg08564874	NPSR1	NM_207173	TSS1500		7	34663248	F	1.41222e-05	0.0269557	0.100197	0.79492	0.810636	0.787846	0.692064	0.697302	0.703446
cg18942579	TMEM49	NM_030938	Body		17	55270555	R	0.000968857	0.0474297	0.100185	0.505279	0.570561	0.533152	0.440766	0.429006	0.438664
cg20993909				S_Shore	8	906135	R	0.000176473	0.0310789	0.100172	0.788755	0.820093	0.792761	0.682317	0.706162	0.712614
cg24154699	LILRB1	NM_001081638	TSS1500		19	59833178	R	0.000896662	0.0459762	0.10017	0.826591	0.815266	0.777269	0.727586	0.687369	0.703661
cg10498052	NCRNA00188	NR_027172	Body		17	16307957	F	0.000129645	0.0292286	0.100145	0.61697	0.626192	0.632907	0.544511	0.503964	0.52716
cg15298173					15	27691192	R	1.28119e-05	0.0269557	0.10014	0.655163	0.655024	0.654454	0.566995	0.541772	0.555453
cg00656728	GUCA2B	NM_007102	TSS1500		1	42391093	F	0.000223204	0.0326109	0.100135	0.690175	0.725014	0.713167	0.615782	0.590056	0.622114
cg12397188	PSORS1C3	NR_026816	Body		6	31252047	R	1.26515e-05	0.0269557	0.100133	0.763755	0.780654	0.759343	0.663551	0.674199	0.665602
cg07563050					6	169572577	F	0.00029315	0.0337564	0.100129	0.750858	0.787136	0.783706	0.657173	0.673866	0.690273
cg06450373	CDH18	NM_001167667	Body		5	19802191	R	5.56991e-05	0.0269557	0.100107	0.864191	0.849025	0.845005	0.769413	0.748171	0.740316
cg13171406	MTNR1B	NM_005959	Body		11	92352646	R	9.08329e-05	0.0284311	0.100103	0.818217	0.835593	0.801175	0.723645	0.725047	0.705982
cg23919844	ARHGEF7	NM_001113511	Body		13	110617482	R	0.000304714	0.0340405	0.10006	0.441465	0.459693	0.478042	0.344663	0.380652	0.353704
cg05256179	BAT5	NM_021160	Body		6	31766155	F	0.000905555	0.0461512	0.100056	0.768538	0.816041	0.818494	0.699677	0.684758	0.718471
cg24980995	DIRC3	NR_026597	Body		2	217928043	F	0.000884279	0.0457571	0.100004	0.820618	0.851203	0.870522	0.736073	0.771471	0.734787
cg18804963	OPCML	NM_002545	Body		11	131961283	R	0.000534758	0.0390697	0.0999933	0.751519	0.786076	0.764723	0.681272	0.680962	0.640104
cg09111831	IQSEC3	NM_001170738	Body		12	132243	F	0.000119964	0.0291649	0.0999926	0.775583	0.78423	0.788285	0.694513	0.659088	0.694519
cg25026904					4	169066469	F	7.48225e-05	0.0272175	0.0999753	0.747032	0.777531	0.756556	0.664331	0.647511	0.669352
cg08471896	RAB3GAP1	NM_012233	TSS1500		2	135525030	R	3.2027e-05	0.0269557	0.099975	0.821464	0.80176	0.794405	0.707192	0.697751	0.712762
cg05157791	RASAL1	NM_004658	Body	S_Shore	12	112035419	R	0.00035588	0.0354442	0.0999433	0.757267	0.79387	0.762928	0.673206	0.68891	0.652119
cg00018044	ESCO1	NM_052911	3'UTR		18	17363494	R	0.000120617	0.0291649	0.0999366	0.838969	0.868264	0.871082	0.75563	0.749884	0.772991
cg23499632					5	1193123	R	0.00053802	0.039111	0.0999213	0.714261	0.758865	0.758587	0.659591	0.631295	0.641064
cg06730183					5	76041455	F	0.000688805	0.0420983	0.0999169	0.87261	0.886579	0.891256	0.810958	0.752479	0.787258
cg05783585	TMEM9	NM_016456	Body		1	199385155	F	0.000670597	0.0417978	0.099916	0.866209	0.895862	0.867041	0.75094	0.775973	0.802451
cg04481603				S_Shore	10	104172920	R	0.000381223	0.0359427	0.0999155	0.507753	0.557927	0.538593	0.446914	0.429106	0.428506
cg16594273					16	56688813	R	0.000369504	0.035653	0.0999037	0.389854	0.397145	0.385885	0.290414	0.317969	0.264792
cg24728949	EFNA5	NM_001962	Body		5	106848068	F	0.000436728	0.0371184	0.0998645	0.775799	0.815617	0.823708	0.703863	0.717393	0.694274
cg19998328	YIPF2	NM_024029	Body	N_Shore	19	10899320	F	3.96112e-05	0.0269557	0.0998602	0.768151	0.766068	0.787541	0.678411	0.660709	0.68306
cg23117999	C14orf132	NR_023938	Body	S_Shore	14	95578055	F	0.000428522	0.036944	0.0998516	0.572689	0.626288	0.611451	0.5015	0.500582	0.508791
cg02421207					10	64487830	R	0.000335229	0.0347758	0.0998444	0.772087	0.818988	0.796742	0.705821	0.700616	0.681847
cg26557834	SGK1	NM_001143676	Body		6	134612164	R	0.000802692	0.0445184	0.0998318	0.877553	0.814958	0.841755	0.742737	0.751555	0.740479
cg26810908	ZP4	NM_021186	TSS1500		1	236121192	R	0.00047152	0.0376704	0.0998043	0.892388	0.869203	0.857955	0.757304	0.799168	0.76366
cg19243330	CSAD	NM_015989	3'UTR		12	51838541	F	0.000127481	0.0292137	0.0997521	0.774005	0.773865	0.791214	0.680241	0.660547	0.69904
cg14329680					11	115710272	F	1.55681e-05	0.0269557	0.0997045	0.737932	0.76431	0.752269	0.651023	0.652412	0.651963
cg13705949				N_Shelf	20	24843861	R	0.000355137	0.0354236	0.0997039	0.773589	0.818982	0.798963	0.708482	0.702743	0.681197
cg01115636	MCTS1	NM_014060	3'UTR		X	119636004	F	0.000764556	0.0438289	0.0996777	0.915948	0.910872	0.864091	0.791213	0.81265	0.788014
cg23891364	UBE2J2	NM_194315	5'UTR	N_Shore	1	1197652	R	0.00101845	0.0482639	0.0996763	0.83236	0.820966	0.85896	0.750011	0.706513	0.756733
cg04231019	UMOD	NM_003361	5'UTR	S_Shelf	16	20270510	R	0.000653872	0.0414369	0.0996366	0.707851	0.731695	0.759202	0.615732	0.648511	0.635594
cg05132150					4	108289431	R	0.000805285	0.0445246	0.0996017	0.850204	0.809646	0.788619	0.710127	0.717357	0.72218
cg14153677	CASC2	NR_026940	Body		10	119925756	R	0.000176616	0.0310789	0.0995658	0.800027	0.815641	0.842828	0.719478	0.711867	0.728453
cg16357353					1	20610374	R	6.99992e-05	0.0269557	0.0995472	0.61891	0.616053	0.647938	0.534741	0.520877	0.528642
cg07671622	VAC14	NM_018052	Body		16	69317495	F	9.58154e-05	0.0284616	0.0995074	0.777579	0.808113	0.806252	0.690461	0.710383	0.692579
cg10683565	ROBO1	NM_002941	Body		3	79460731	R	0.000781704	0.0442104	0.0994528	0.714618	0.766861	0.756684	0.629477	0.651423	0.658905
cg24796852	GMFG	NM_004877	TSS1500		19	44519109	R	0.000201875	0.0320018	0.0994523	0.505553	0.514117	0.539781	0.42316	0.434615	0.403319
cg18287066	GREM2	NM_022469	5'UTR		1	238738270	F	0.000680407	0.0419969	0.0994137	0.730031	0.761069	0.731201	0.648061	0.61349	0.662508
cg26343116				S_Shore	5	171978565	R	0.000109044	0.029118	0.0993672	0.840369	0.838182	0.858329	0.748316	0.762833	0.72763
cg24645671					7	42623396	F	0.000268109	0.0333192	0.099355	0.790082	0.808298	0.815522	0.728323	0.702044	0.68547
cg12019614	DOCK6	NM_020812	Body	Island	19	11214996	R	0.00102695	0.0483911	0.099344	0.420169	0.421455	0.422026	0.296481	0.359762	0.309374
cg19071507					2	70086073	R	0.000475577	0.0377537	0.0993416	0.820119	0.851211	0.839256	0.71228	0.759519	0.740761
cg14421582	MEGF6	NM_001409	Body		1	3471528	R	0.000108131	0.0291071	0.0993328	0.743381	0.726086	0.725759	0.65332	0.623868	0.62004
cg13795321					15	69185156	R	0.000230442	0.0327478	0.0993276	0.714771	0.751288	0.759186	0.635459	0.644813	0.64699
cg25941354	CXCR2	NM_001557	TSS1500		2	218698228	F	1.43215e-05	0.0269557	0.099268	0.607076	0.618011	0.61086	0.516452	0.499725	0.521967
cg08327151	ATP11A	NM_015205	Body		13	112483839	R	0.000432597	0.0369637	0.0992477	0.85435	0.906304	0.896737	0.782339	0.787768	0.78954
cg14406814	PTPRD	NM_002839	5'UTR		9	10222876	R	0.00049731	0.0381701	0.0992423	0.760043	0.796458	0.791099	0.66394	0.705527	0.680407
cg18403193	C6orf176	NR_026861	Body	N_Shelf	6	166269967	F	0.00039964	0.0361387	0.0992252	0.716411	0.757754	0.747363	0.638717	0.659462	0.625673
cg08248577	IQCK	NM_153208	TSS1500	N_Shore	16	19634948	R	0.000481565	0.0379228	0.0991677	0.758213	0.777372	0.797743	0.673578	0.661047	0.7012
cg14555736	TMEM132C	NM_001136103	Body	S_Shelf	12	127418935	R	4.15453e-05	0.0269557	0.0991294	0.83378	0.852558	0.861499	0.753641	0.756821	0.739988
cg02339122	ANKFN1	NM_153228	Body		17	51600139	R	0.000838137	0.0451753	0.099115	0.736448	0.797048	0.778479	0.662789	0.674697	0.677144
cg02662441	SUFU	NM_016169	Body		10	104345814	F	0.000353486	0.035355	0.0990964	0.851042	0.88574	0.841577	0.774876	0.749304	0.756889
cg08596486					8	12982682	F	0.00102287	0.0483311	0.0990914	0.571451	0.619198	0.574556	0.501312	0.500323	0.466296
cg08754088	UNC5D	NM_080872	Body		8	35621476	R	6.35601e-05	0.0269557	0.0990683	0.753666	0.789566	0.764409	0.669293	0.670378	0.670764
cg17866692	TRPV4	NM_021625	Body		12	108712432	R	0.000135923	0.0296691	0.0990561	0.70634	0.702527	0.725345	0.59848	0.605808	0.632756
cg09223851	SH2B2	NM_020979	Body	S_Shore	7	101724835	R	3.69852e-05	0.0269557	0.0990406	0.689759	0.6906	0.689912	0.572315	0.599361	0.601473
cg17242596	OPCML	NM_002545	Body		11	132032506	F	0.000292824	0.0337564	0.0990115	0.791136	0.836138	0.814756	0.706626	0.709263	0.729106
cg00887508					13	21323573	F	0.000443131	0.0372427	0.0989909	0.715448	0.762753	0.758617	0.65358	0.63544	0.650825
cg22931622					3	65104195	F	2.71668e-05	0.0269557	0.0989859	0.806829	0.802354	0.816468	0.717318	0.717109	0.694266
cg06759632	ACAP3	NM_030649	Body		1	1225293	R	1.58968e-06	0.0269557	0.0989851	0.878495	0.884196	0.887137	0.78534	0.786575	0.780957
cg17749520	ITGA2B	NM_000419	Body	S_Shelf	17	39822093	R	0.00100225	0.0478897	0.0989711	0.536041	0.590724	0.557497	0.481934	0.460126	0.445289
cg04515986	FTHL17	NM_031894	1stExon	N_Shore	X	30999613	R	0.000221602	0.0325755	0.098957	0.846312	0.816878	0.864405	0.746492	0.743616	0.740616
cg07179329	CDH13	NM_001257	Body		16	81729493	F	1.09308e-05	0.0269557	0.0988685	0.791565	0.80484	0.811387	0.696616	0.706874	0.707695
cg12036735					8	20214196	F	0.00011937	0.0291649	0.0987963	0.561164	0.548401	0.589321	0.470741	0.466272	0.465483
cg13856126	RALGPS1	NM_014636	Body		9	128910584	R	0.000657119	0.0415091	0.0987429	0.727899	0.768003	0.781323	0.660931	0.671991	0.648074
cg20948091	BSN	NM_003458	Body		3	49583044	R	7.46638e-06	0.0269557	0.0987236	0.832979	0.830093	0.835065	0.722248	0.738753	0.740965
cg01943585	CTTNBP2NL	NM_018704	Body		1	112783216	R	4.26116e-05	0.0269557	0.0987131	0.865042	0.86708	0.882293	0.758808	0.772987	0.786481
cg00770443	WSCD2	NM_014653	Body		12	107135975	R	0.000455216	0.0374074	0.0986434	0.629846	0.612039	0.611614	0.546889	0.515385	0.495295
cg25376310	ZDHHC14	NM_153746	Body		6	157938898	R	0.000143657	0.0300948	0.0986341	0.410417	0.44624	0.439383	0.321323	0.336064	0.342751
cg09676013	HLA-DPB2	NR_001435	Body		6	33188478	R	0.000803944	0.0445194	0.0986234	0.756957	0.733117	0.712003	0.637095	0.656612	0.6125
cg16506185	C14orf48	NR_024184	TSS200		14	93533241	R	2.7044e-05	0.0269557	0.098591	0.759196	0.786044	0.782861	0.680915	0.676267	0.675145
cg04258926	TNXB	NM_019105	Body	S_Shore	6	32165319	R	0.00014426	0.0300948	0.098569	0.752703	0.745708	0.771877	0.64347	0.653907	0.677204
cg03599590	SLC35A5	NM_017945	5'UTR	S_Shore	3	113764721	R	5.67652e-05	0.0269557	0.0985538	0.37504	0.377256	0.372519	0.259334	0.294664	0.275156
cg27294813	SH3RF3	NM_001099289	Body		2	109158031	F	0.000405749	0.0362642	0.0985464	0.903451	0.874291	0.86907	0.796502	0.794081	0.76059
cg06526997	IQCK	NM_153208	3'UTR		16	19776113	R	0.000205739	0.0321699	0.0985095	0.829168	0.854119	0.81578	0.725356	0.728203	0.74998
cg25748521	HIPK2	NM_001113239	Body		7	139017298	R	1.83415e-06	0.0269557	0.098489	0.80999	0.816227	0.814319	0.720337	0.713536	0.711196
cg14671809	ERC2	NM_015576	3'UTR		3	55533253	R	0.000193665	0.0315975	0.0984837	0.76483	0.778704	0.73999	0.674661	0.66401	0.649403
cg07052063	MMS19	NM_022362	Body	N_Shelf	10	99245226	R	0.000509918	0.0385776	0.098426	0.490097	0.517734	0.536109	0.412612	0.401517	0.434532
cg21957813	CD82	NM_001024844	Body		11	44595096	F	0.000363897	0.035589	0.0984256	0.586444	0.586866	0.62178	0.513333	0.480394	0.506087
cg16071091	NFATC1	NM_006162	Body	Island	18	75297135	R	8.70762e-05	0.0279201	0.0983891	0.858381	0.859346	0.881668	0.76593	0.754734	0.783564
cg04527429	PALM	NM_002579	Body	N_Shelf	19	667910	R	0.000432435	0.0369637	0.0983692	0.754271	0.798978	0.774356	0.688945	0.684564	0.658988
cg13858407	SH3BP4	NM_014521	5'UTR		2	235600345	F	3.66611e-06	0.0269557	0.0983516	0.85121	0.865054	0.857478	0.764402	0.757026	0.757258
cg00695112	TJP2	NM_001170414	Body	N_Shore	9	71052567	R	0.000115284	0.0291527	0.098331	0.752057	0.749091	0.773675	0.660241	0.643839	0.67575
cg07609844					2	151097601	R	0.000781092	0.0442071	0.0983216	0.744546	0.781111	0.728136	0.659381	0.664196	0.635252
cg10484211	TGFB2	NM_003238	Body		1	216614558	R	0.000143004	0.0300823	0.0983185	0.748675	0.769034	0.775954	0.682426	0.649227	0.667055
cg07449209					3	118750626	F	7.27184e-05	0.0269557	0.0982877	0.847144	0.86453	0.856799	0.774636	0.741271	0.757703
cg11032810	MAML3	NM_018717	Body		4	141276492	R	6.36774e-05	0.0269557	0.0982868	0.632605	0.633479	0.64969	0.55385	0.523362	0.543702
cg00049883					16	5494274	F	0.000293231	0.0337564	0.0982715	0.467439	0.493652	0.517814	0.396217	0.397172	0.390702
cg03743675				S_Shore	1	38818084	F	0.000210821	0.032302	0.0981844	0.772793	0.754668	0.801328	0.678318	0.675094	0.680824
cg18126060	KCNA6	NM_002235	3'UTR	S_Shelf	12	4793691	R	8.47552e-05	0.0278128	0.0981829	0.837148	0.851517	0.845062	0.759368	0.725755	0.754054
cg14209317				N_Shore	9	35646693	R	3.49315e-05	0.0269557	0.0981552	0.868902	0.87027	0.885406	0.766584	0.772248	0.79128
cg14649874					3	63188400	R	0.000362788	0.0355752	0.0981522	0.678586	0.695694	0.698331	0.619308	0.587194	0.571653
cg25220990					5	4259669	R	0.00101791	0.0482446	0.0981015	0.773411	0.750417	0.755215	0.687273	0.62769	0.669776
cg07593801	MUTED	NM_201280	Body		6	7974269	R	0.00108903	0.0494452	0.0980982	0.769403	0.794534	0.822386	0.67488	0.70263	0.714518
cg11963400	TRIM40	NM_138700	Body		6	30220748	R	0.000596714	0.0403941	0.0980744	0.759545	0.805432	0.783155	0.696374	0.694177	0.663358
cg04611161					16	51198657	R	0.000364359	0.0356139	0.0980061	0.621588	0.668211	0.659315	0.561974	0.550107	0.543014
cg26986989					5	2391998	R	0.000668395	0.0417474	0.0979918	0.77582	0.820866	0.786508	0.695453	0.715674	0.678093
cg04461123	SHROOM3	NM_020859	Body	Island	4	77880825	F	0.000160529	0.0307112	0.0979853	0.834818	0.861595	0.861934	0.746911	0.744291	0.773189
cg15343224					11	133811788	F	0.000421817	0.0368073	0.0979764	0.765424	0.771701	0.783155	0.662523	0.658624	0.705203
cg07813275	NPL	NM_030769	TSS1500	S_Shore	1	181026766	R	0.000805228	0.0445246	0.0979586	0.731302	0.754088	0.77343	0.648312	0.6359	0.680732
cg03734026				N_Shore	22	48964567	F	0.00101764	0.0482428	0.0979561	0.795578	0.847725	0.851736	0.726551	0.729476	0.745143
cg12594140	PACRG	NM_152410	Body		6	163426780	R	5.66782e-06	0.0269557	0.0979083	0.793576	0.791484	0.800127	0.68992	0.706237	0.695306
cg16710604					15	31212044	R	0.000242731	0.0327987	0.0979035	0.865517	0.898817	0.909764	0.784587	0.79934	0.79646
cg02991753	SYNPO2	NM_133477	Body		4	120180620	R	0.000565207	0.0397241	0.0978985	0.881918	0.884008	0.880361	0.795729	0.805661	0.751202
cg04138756	SPRR3	NM_001097589	TSS1500		1	151240473	R	0.000625298	0.0408163	0.0978845	0.746035	0.804097	0.768322	0.670122	0.675028	0.67965
cg25050565	NRG1	NM_013962	Body		8	31799536	F	1.7192e-05	0.0269557	0.0978639	0.623565	0.639325	0.628138	0.520571	0.536975	0.539891
cg24781699					15	90940402	F	0.000100066	0.0288111	0.0978623	0.781672	0.792376	0.795672	0.713415	0.678578	0.684139
cg08638960					6	168384559	F	0.000481255	0.0379228	0.0978501	0.694814	0.748008	0.707906	0.616298	0.62429	0.61659
cg06683078	KRTAP12-1	NM_181686	TSS200		21	44926670	R	0.000778712	0.0441522	0.0978285	0.657339	0.697775	0.688106	0.557048	0.598215	0.594472
cg08881610				N_Shelf	6	100688554	F	0.000433261	0.0369666	0.0977309	0.744821	0.792424	0.75353	0.654609	0.667571	0.675403
cg16651895	VAT1L	NM_020927	Body		16	76467792	F	0.000551492	0.0394202	0.0977286	0.704206	0.751782	0.73758	0.643331	0.615753	0.641299
cg01521036	FAM90A14	NM_001164452	Body		8	7612650	F	0.000652031	0.0414142	0.0977012	0.824434	0.854756	0.863356	0.742145	0.732903	0.774394
cg16725552					14	25408122	R	4.83582e-05	0.0269557	0.0976923	0.829361	0.80722	0.796648	0.711745	0.717151	0.711256
cg01082907	DACT2	NM_214462	Body	N_Shore	6	168451916	R	0.000123603	0.0292042	0.0976299	0.7751	0.793871	0.778331	0.688071	0.701384	0.664957
cg23296791	CLC	NM_001828	TSS1500		19	44921606	F	0.000488858	0.0380412	0.0975668	0.404248	0.404917	0.452678	0.32788	0.320992	0.320271
cg06381864	RICH2	NM_014859	Body		17	12746143	R	0.00012212	0.0291649	0.0975438	0.612895	0.632909	0.591535	0.515496	0.517578	0.511633
cg27611263	THUMPD2	NM_025264	TSS1500	S_Shore	2	39860565	R	0.00040204	0.0361821	0.0975121	0.68187	0.681105	0.716101	0.59699	0.576755	0.612794
cg16048915	TMEM132D	NM_133448	Body		12	128649988	R	9.32037e-05	0.0284616	0.0975041	0.766965	0.790312	0.773261	0.663235	0.694279	0.680511
cg23041447				S_Shelf	13	22171266	R	0.000139287	0.0298449	0.0974883	0.816386	0.839108	0.842036	0.7525	0.720278	0.732287
cg00661018	KIAA1688	NM_025251	Body	N_Shore	8	145739894	F	2.18418e-05	0.0269557	0.0974793	0.772124	0.777154	0.79208	0.691806	0.683934	0.673179
cg08940252					15	90928084	R	0.000173607	0.0308526	0.0974681	0.726336	0.746766	0.759641	0.646179	0.632055	0.662105
cg02906784	CACNA2D3	NM_018398	Body		3	54790704	R	0.000623639	0.040773	0.0974537	0.808839	0.84159	0.791086	0.71578	0.702041	0.731333
cg26137219				N_Shore	10	30760653	F	0.00112298	0.049962	0.0974466	0.873234	0.890929	0.882425	0.814518	0.75059	0.789139
cg02881186	TRAPPC9	NM_001160372	Body		8	140961191	F	0.000106501	0.0291071	0.0974194	0.820163	0.841491	0.82645	0.726614	0.751018	0.718213
cg02272429					15	23307137	F	1.22456e-05	0.0269557	0.0974169	0.784223	0.805102	0.794493	0.69219	0.703523	0.695854
cg03032798					2	221007147	F	0.000188441	0.0313922	0.0974164	0.654471	0.665256	0.674743	0.5778	0.580696	0.543725
cg17316300	IQCA1	NM_024726	Body		2	237046332	R	0.000125342	0.0292042	0.0974155	0.756429	0.791771	0.792765	0.68515	0.684721	0.678847
cg01514075	VAMP3	NM_004781	Body	S_Shore	1	7754944	F	0.000160986	0.0307112	0.0973221	0.757064	0.776183	0.778517	0.652102	0.687806	0.67989
cg10305797	KRTDAP	NM_207392	TSS1500		19	40673517	R	0.000516266	0.0387095	0.0973205	0.843586	0.882594	0.88465	0.770877	0.790242	0.75775
cg14653988	ODZ2	NM_001122679	Body		5	167103862	R	0.00111841	0.0498841	0.0973165	0.675898	0.706547	0.714249	0.632072	0.587062	0.58561
cg08677140	PPP1R10	NM_002714	5'UTR	N_Shelf	6	30690220	F	6.11187e-05	0.0269557	0.0973165	0.5725	0.567798	0.580396	0.491664	0.458517	0.478563
cg24825767	CACNB2	NM_201571	Body		10	18493325	R	0.000583338	0.0400605	0.0972701	0.72783	0.737088	0.759526	0.632262	0.628484	0.671886
cg27417606	RNASE13	NM_001012264	TSS1500		14	20572984	R	0.000299618	0.0338808	0.0971994	0.831425	0.844362	0.860792	0.766041	0.753062	0.725877
cg08881785				S_Shelf	3	156947770	R	0.000456179	0.0374074	0.0971338	0.753186	0.732271	0.778035	0.667158	0.665189	0.639743
cg25948591					17	40032523	F	0.00010308	0.0289132	0.0971113	0.696559	0.725627	0.698384	0.608247	0.622103	0.598887
cg01702210	SLC35F4	NM_001080455	TSS1500		14	57134679	R	0.000336352	0.0348038	0.0971005	0.687237	0.719747	0.72026	0.591968	0.624934	0.619041
cg00329615	IGSF11	NM_001015887	Body		3	120189338	R	0.000146816	0.0301803	0.0970885	0.760775	0.785511	0.771973	0.689811	0.655753	0.681429
cg04563046	RUNX1T1	NM_004349	Body		8	93074483	R	0.000142119	0.0300605	0.0970819	0.791441	0.801171	0.78376	0.717698	0.684492	0.682936
cg22377482	C3orf21	NM_152531	Body		3	196422992	F	5.53173e-05	0.0269557	0.097081	0.872993	0.886714	0.874141	0.790166	0.789644	0.762794
cg16966139	LOC441897	NR_029429	TSS1500		1	111735280	R	5.25115e-05	0.0269557	0.0970666	0.74043	0.729702	0.731333	0.653228	0.620854	0.636183
cg02082083	PLA2G5	NM_000929	TSS200		1	20269147	F	0.000168275	0.0307841	0.0970661	0.818175	0.813749	0.78333	0.713409	0.71604	0.694608
cg06245338	UBE2O	NM_022066	Body		17	71922434	F	7.22091e-05	0.0269557	0.0970375	0.316523	0.334923	0.335137	0.23282	0.21626	0.24639
cg11947262					4	93098378	R	0.000436648	0.0371184	0.097028	0.672572	0.722598	0.711115	0.59793	0.604367	0.612903
cg20099511					7	62541833	R	0.000401703	0.036164	0.097004	0.735526	0.759406	0.770321	0.635013	0.670785	0.668443
cg16678564	EPB49	NM_001978	1stExon	S_Shelf	8	21972748	F	0.000206487	0.0321999	0.0969774	0.748177	0.775768	0.786247	0.686135	0.661427	0.671698
cg04934519					1	183570070	F	0.000117638	0.0291527	0.0969608	0.83793	0.861191	0.857814	0.770681	0.757156	0.738216
cg05558046	GAS7	NM_201432	Body		17	9870826	R	3.25531e-05	0.0269557	0.0968998	0.78385	0.771137	0.780029	0.695421	0.681171	0.667725
cg25041439	HYLS1	NM_145014	TSS1500	N_Shelf	11	125258320	F	0.000157451	0.030623	0.0968783	0.824241	0.867437	0.845246	0.750649	0.74451	0.75113
cg02268510	SIPA1L3	NM_015073	Body	N_Shelf	19	43373455	F	0.000315444	0.0343137	0.0968284	0.832363	0.866821	0.86097	0.737089	0.770856	0.761723
cg07175433	KCNIP4	NM_147182	5'UTR	N_Shelf	4	21556498	F	0.000289917	0.0337303	0.0968039	0.723936	0.75627	0.740598	0.663975	0.626491	0.639925
cg04307853	WSCD1	NM_015253	Body	N_Shelf	17	5962142	F	0.000971428	0.0474631	0.0967927	0.781362	0.834106	0.838345	0.726906	0.719102	0.717427
cg00661347	COL13A1	NM_080798	Body		10	71331234	R	9.16193e-05	0.0284311	0.0967891	0.658676	0.649063	0.659642	0.55884	0.577627	0.540546
cg17567602	UXS1	NM_025076	Body		2	106098544	F	0.000823061	0.0448419	0.0967745	0.878145	0.913505	0.915877	0.815227	0.822187	0.779789
cg22966302	NFIX	NM_002501	Body	N_Shelf	19	13057617	F	0.00032071	0.0344885	0.0967695	0.712769	0.683352	0.718056	0.598786	0.597179	0.627904
cg24042923					1	232086070	R	4.28276e-05	0.0269557	0.096767	0.657759	0.628962	0.650867	0.556434	0.545288	0.545564
cg23789148					15	95122150	R	0.0010208	0.0483009	0.096733	0.665441	0.709055	0.670347	0.564498	0.581981	0.608165
cg06500090					6	165599863	R	8.43317e-05	0.0278128	0.0966942	0.797611	0.81111	0.817318	0.707778	0.729855	0.698324
cg21091841					13	33149239	F	0.00045914	0.0374184	0.0966846	0.724296	0.775338	0.734426	0.64642	0.65335	0.644236
cg22126965	COX19	NM_001031617	TSS1500	S_Shore	7	982027	F	0.000793188	0.0443567	0.0966297	0.70875	0.648103	0.670752	0.580523	0.5763	0.580892
cg11018892					6	9756205	R	8.94425e-05	0.0283166	0.0966136	0.61106	0.606044	0.577745	0.499416	0.509565	0.496027
cg06817368	DCP2	NM_152624	Body	S_Shelf	5	112343531	F	0.000108403	0.0291071	0.0965922	0.78209	0.806682	0.816833	0.711674	0.709516	0.694639
cg26264896					2	131371599	F	0.000125374	0.0292042	0.0965834	0.757348	0.760912	0.774712	0.64669	0.674347	0.682184
cg14326354	PRODH	NM_016335	3'UTR		22	17280453	F	2.36781e-05	0.0269557	0.0965624	0.741968	0.764238	0.747457	0.663771	0.65109	0.649115
cg05715492	ARPC1B	NM_005720	Body	S_Shore	7	98829074	R	0.000623303	0.040773	0.0965524	0.888394	0.939104	0.908939	0.831943	0.808911	0.805927
cg08417857	NALCN	NM_052867	5'UTR		13	100855991	F	0.000237772	0.0327587	0.0965444	0.826459	0.862356	0.837496	0.731973	0.761938	0.742767
cg02920600	DGKI	NM_004717	Body		7	137017881	R	6.38247e-05	0.0269557	0.0965182	0.80729	0.813084	0.798432	0.715508	0.722348	0.691396
cg12421966				N_Shore	2	240314662	F	0.000399496	0.0361387	0.0964847	0.797779	0.807326	0.786339	0.683018	0.690436	0.728536
cg00472373	ARPC4	NM_001024960	TSS1500	N_Shore	3	9808414	R	0.000637709	0.0411127	0.0964607	0.821401	0.789125	0.803587	0.715001	0.681114	0.728615
cg20886721	OR8U8	NM_001013356	Body		11	56185278	R	0.000356494	0.035481	0.0964564	0.634023	0.656975	0.648619	0.526302	0.551287	0.57266
cg25600951				N_Shelf	2	62273389	R	8.41954e-05	0.0278128	0.0964207	0.823966	0.808375	0.791651	0.72278	0.703689	0.70826
cg25122433	CAB39	NM_016289	5'UTR		2	231310423	R	0.000599307	0.0403941	0.0964028	0.448982	0.462476	0.498361	0.366632	0.389211	0.364768
cg10170847				N_Shelf	19	46525869	R	0.000474891	0.0377446	0.096348	0.721603	0.755158	0.775518	0.656261	0.649756	0.657218
cg18418479	MINK1	NM_153827	TSS1500	N_Shore	17	4682168	F	4.17395e-05	0.0269557	0.0963123	0.58455	0.611262	0.604303	0.506718	0.510053	0.494406
cg22123865	DCLK1	NM_004734	Body		13	35525609	F	1.90245e-05	0.0269557	0.0962738	0.85556	0.845832	0.86138	0.75034	0.770137	0.753474
cg23361764	ODZ4	NM_001098816	Body		11	78220596	R	0.000543099	0.0392197	0.0962691	0.731633	0.765152	0.74076	0.659967	0.664854	0.623918
cg05729745				S_Shelf	22	48323648	R	6.29329e-06	0.0269557	0.0962278	0.824733	0.825008	0.834002	0.725794	0.728641	0.740624
cg04315554	DPP10	NM_020868	Body		2	115175029	F	0.000116155	0.0291527	0.0961381	0.788122	0.827141	0.800612	0.704555	0.711477	0.711429
cg17008160					1	230382158	F	4.64297e-05	0.0269557	0.0960567	0.725785	0.739916	0.739825	0.622859	0.649911	0.644586
cg13277254	FBXW11	NM_033645	Body		5	171266406	R	0.000902223	0.0461042	0.0959998	0.646011	0.656241	0.694415	0.548649	0.577687	0.582332
cg24132325	SGCD	NM_001128209	Body		5	155841824	R	0.000701617	0.0423958	0.0959933	0.853504	0.838382	0.827808	0.751889	0.714016	0.76581
cg07236001					11	1348936	R	0.000385202	0.0360479	0.0959026	0.766111	0.784486	0.800249	0.669992	0.683956	0.70919
cg19574327					11	95971416	F	4.07423e-05	0.0269557	0.0958956	0.692031	0.702226	0.723015	0.607928	0.612171	0.609486
cg19793904	TMEM132C	NM_001136103	Body		12	127509230	R	0.000209464	0.032302	0.0958597	0.823467	0.841424	0.809457	0.711614	0.744515	0.73064
cg13666232				S_Shelf	2	228757058	R	0.000279909	0.0334824	0.0958551	0.779621	0.77532	0.769027	0.695491	0.689479	0.651432
cg18601466				N_Shore	10	132472180	R	3.53968e-05	0.0269557	0.0958457	0.810052	0.829449	0.835052	0.721493	0.728023	0.7375
cg06462220	KIAA1949	NM_001134870	Body		6	30754735	R	5.83507e-05	0.0269557	0.0958048	0.28848	0.301273	0.29889	0.200297	0.216397	0.184535
cg25549519	MAGEA10	NM_001011543	5'UTR		X	151056750	F	0.000447907	0.0373624	0.0958038	0.827719	0.829034	0.844939	0.765554	0.73288	0.715847
cg07696099	HPYR1	NR_026684	TSS200		8	133642991	R	0.000686383	0.0420709	0.0957978	0.70351	0.753186	0.726998	0.616738	0.630911	0.648652
cg09487449	KPTN	NM_007059	Body	N_Shelf	19	52675475	R	0.000318016	0.034422	0.0957781	0.545898	0.546306	0.589515	0.466718	0.463279	0.464388
cg26771097	MSLN	NM_005823	TSS1500		16	750892	R	0.00108445	0.0493818	0.0957759	0.708085	0.7495	0.752059	0.624816	0.632699	0.664801
cg17033359					11	57394733	F	0.000750299	0.0435221	0.0957508	0.730254	0.716298	0.731536	0.660151	0.602505	0.628179
cg14821245	CTNNA2	NM_004389	Body		2	80106521	R	0.000887586	0.0458134	0.0957414	0.690975	0.747908	0.726861	0.625676	0.614478	0.638365
cg21160105	ZBTB46	NM_025224	Body	Island	20	61854770	F	0.000542113	0.0392025	0.0957177	0.840608	0.831556	0.879565	0.741265	0.761493	0.761818
cg04571833	RAPGEF4	NM_007023	Body		2	173545002	F	0.000136615	0.0297333	0.0957074	0.831402	0.85767	0.845353	0.757849	0.759163	0.73029
cg09837116	HRNBP3	NM_001082575	5'UTR	N_Shelf	17	74701954	F	0.000489056	0.0380412	0.0956108	0.682505	0.717011	0.705601	0.61022	0.624822	0.583242
cg00672093					2	139371314	R	0.000299226	0.0338682	0.0956092	0.859358	0.854919	0.844598	0.764849	0.730944	0.776254
cg17550175				N_Shelf	10	95312260	F	0.000138603	0.0297731	0.0956012	0.865619	0.881243	0.890804	0.788958	0.796987	0.764916
cg03545404	CDX1	NM_001804	Body		5	149536543	R	7.23555e-05	0.0269557	0.0955784	0.709741	0.740733	0.71745	0.61861	0.635208	0.62737
cg21255356					6	169188837	F	0.000291263	0.0337564	0.0955643	0.728772	0.746235	0.725873	0.650042	0.651468	0.612677
cg13585675	NPTX2	NM_002523	Body	S_Shelf	7	98087961	F	0.000981659	0.0476206	0.0955373	0.792764	0.797602	0.805625	0.667327	0.72337	0.718682
cg14507845					9	136557890	R	2.39393e-05	0.0269557	0.0955281	0.78499	0.805615	0.80022	0.711167	0.693882	0.699191
cg14174502					1	104324882	F	0.000145535	0.0301341	0.095517	0.777671	0.76351	0.793053	0.668082	0.681251	0.69835
cg02810149					6	45716916	R	2.46139e-05	0.0269557	0.0955162	0.810731	0.83128	0.82198	0.717265	0.724187	0.73599
cg12960696	SH3TC2	NM_024577	Body		5	148384307	R	0.00092305	0.0465218	0.0954951	0.726496	0.753073	0.776873	0.663282	0.671059	0.635616
cg17848546	LOC642587	NM_001104548	Body		1	207671927	F	0.000108368	0.0291071	0.0954352	0.802899	0.82904	0.814708	0.704108	0.733578	0.722656
cg10443237	GUCA2B	NM_007102	3'UTR		1	42393929	F	0.000917265	0.0463661	0.095427	0.788392	0.84508	0.837963	0.732511	0.72974	0.722904
cg02423618	SPATA8	NM_173499	TSS1500		15	95126729	R	0.000328008	0.0346243	0.095375	0.669259	0.69504	0.668031	0.599476	0.560187	0.586542
cg06661266				N_Shelf	3	135510411	R	0.000201607	0.0320018	0.0953297	0.733027	0.715343	0.724685	0.648435	0.606934	0.631697
cg03309967	U2AF1L4	NM_001040425	Body	N_Shore	19	40927024	R	0.000379657	0.035933	0.0952771	0.748007	0.764495	0.765372	0.668948	0.685179	0.637916
cg09569569	C2orf81	NM_001145054	TSS1500	S_Shore	2	74499277	F	0.00110677	0.0496896	0.0951545	0.801101	0.862321	0.84014	0.749456	0.738193	0.73045
cg10755723	C3orf59	NM_178496	Body		3	194059658	R	0.000857973	0.045434	0.0951111	0.664267	0.680803	0.631253	0.551021	0.583686	0.556283
cg14527645	COL27A1	NM_032888	Body		9	116017745	F	0.000121412	0.0291649	0.0950813	0.764446	0.751981	0.764365	0.672045	0.643778	0.679725
cg13010621					6	92401444	F	0.000800488	0.044497	0.0950643	0.758343	0.773071	0.808857	0.70147	0.670622	0.682987
cg11675225	LSP1	NM_001013253	TSS1500	N_Shelf	11	1846098	F	0.000821382	0.0448192	0.0950602	0.746185	0.794352	0.796992	0.67316	0.693798	0.685391
cg26231761	AJAP1	NM_018836	Body		1	4644656	R	5.92048e-06	0.0269557	0.0950163	0.813653	0.821496	0.803814	0.719666	0.716174	0.718075
cg13512859	SLC34A3	NM_080877	Body	N_Shore	9	139247200	R	0.000493206	0.0380853	0.0950159	0.785439	0.788344	0.832797	0.714055	0.706224	0.701253
cg09657673	TNRC6A	NM_014494	Body		16	24677328	F	0.000999398	0.0478897	0.0949966	0.841834	0.843905	0.889181	0.75029	0.757135	0.782505
cg10594075	TNFRSF19	NM_148957	5'UTR	N_Shore	13	23050135	F	4.53033e-05	0.0269557	0.094982	0.754299	0.778414	0.772549	0.664109	0.684181	0.672026
cg03825175	ODZ4	NM_001098816	Body	N_Shore	11	78457896	R	0.00108097	0.0493125	0.0949694	0.809218	0.84142	0.777767	0.710091	0.713604	0.719802
cg12626076	SLCO3A1	NM_001145044	Body	S_Shore	15	90200199	F	0.000108593	0.0291071	0.0949661	0.813956	0.853113	0.835923	0.740479	0.737137	0.740478
cg13676800					9	88912252	R	9.22493e-05	0.0284616	0.0949622	0.816366	0.835654	0.804509	0.733765	0.725357	0.712521
cg04687241	DLGAP2	NM_004745	Body	N_Shore	8	1603788	R	0.000717451	0.0427183	0.0949435	0.71253	0.725283	0.760431	0.646066	0.619336	0.648012
cg25743482	NAV2	NM_182964	Body		11	19732081	F	3.12165e-05	0.0269557	0.0949331	0.861746	0.860531	0.851988	0.779004	0.754964	0.755498
cg09844805	CSMD2	NM_052896	Body		1	34097770	F	0.000226434	0.0327077	0.0949239	0.740382	0.726633	0.76206	0.650813	0.661258	0.632233
cg04582365					10	58825852	R	3.15645e-05	0.0269557	0.0949198	0.849093	0.852954	0.839809	0.76668	0.74951	0.740906
cg23730649					6	169224525	R	0.000360615	0.035573	0.0949077	0.698207	0.730975	0.735105	0.619845	0.644351	0.615368
cg12225651					4	162518201	R	0.00051745	0.0387287	0.0949015	0.823121	0.79923	0.822661	0.728347	0.738821	0.693138
cg11610626	THEMIS	NM_001164687	5'UTR		6	128263746	F	2.27796e-06	0.0269557	0.094895	0.821078	0.819935	0.821005	0.724196	0.721045	0.732093
cg14215472	ANKRD13B	NM_152345	Body	Island	17	24964530	F	0.000622717	0.040773	0.0948663	0.172628	0.225301	0.208042	0.095772	0.114394	0.111206
cg05973555					2	83967929	R	0.000137377	0.0297555	0.0948587	0.752343	0.784763	0.773436	0.675069	0.688077	0.66282
cg07813254	FAM43B	NM_207334	TSS1500	N_Shore	1	20750260	R	0.000593359	0.0403301	0.0948336	0.728591	0.749522	0.755181	0.678008	0.636663	0.634122
cg25469314	SLC5A9	NM_001011547	Body		1	48477418	R	0.000613121	0.0406864	0.0948225	0.834828	0.862352	0.80848	0.751198	0.735971	0.734024
cg12496694	TNXB	NM_019105	Body		6	32144800	R	1.33562e-05	0.0269557	0.0948173	0.870645	0.891282	0.876776	0.790383	0.781014	0.782855
cg10017653	THBS3	NM_007112	Body	N_Shelf	1	153442965	R	0.000107943	0.0291071	0.0948014	0.709909	0.741141	0.739295	0.640634	0.640266	0.625042
cg23751110					4	18806478	R	0.000334961	0.0347758	0.0947817	0.761194	0.780929	0.772828	0.692701	0.687492	0.650412
cg03039243					1	2772559	R	4.61529e-05	0.0269557	0.0947784	0.628495	0.64836	0.654289	0.554362	0.5387	0.553746
cg01008557					7	31259098	F	5.13022e-05	0.0269557	0.0947546	0.811499	0.806708	0.810643	0.733752	0.705982	0.704852
cg10303698	CUEDC1	NM_017949	5'UTR		17	53324997	R	0.000446833	0.0373518	0.0947534	0.566873	0.602229	0.575725	0.464657	0.499764	0.496146
cg13516479					6	122058328	F	0.000897673	0.0460158	0.0946632	0.808137	0.865337	0.841252	0.737229	0.756618	0.73689
cg06872010	FAM66A	NR_026789	Body		8	12280629	R	0.000106513	0.0291071	0.0946446	0.791996	0.815104	0.815591	0.719949	0.72219	0.696618
cg15861156					10	91727443	F	0.000488083	0.0380412	0.094631	0.774654	0.806475	0.798419	0.719867	0.676861	0.698927
cg13614617	IGDCC3	NM_004884	Body	S_Shelf	15	63443688	R	0.00036532	0.035653	0.0946242	0.899644	0.895566	0.87959	0.777062	0.791393	0.822473
cg02490934	SLC22A2	NM_003058	Body	N_Shore	6	160599168	R	3.69705e-05	0.0269557	0.0945833	0.809652	0.820808	0.82256	0.722925	0.736745	0.7096
cg14857193	ALDH1L1	NM_012190	Body		3	127334699	R	0.000214385	0.0323527	0.0945438	0.677572	0.65211	0.682079	0.590201	0.558651	0.579277
cg15922513	GPR133	NM_198827	Body		12	130127204	F	2.14382e-05	0.0269557	0.0945321	0.717915	0.729415	0.723923	0.615559	0.637882	0.634215
cg19893664	JAG2	NM_002226	Body	N_Shelf	14	104690679	F	0.000299285	0.0338682	0.0945197	0.5767	0.612846	0.56774	0.491665	0.496183	0.48588
cg06856891	CXCL3	NM_002090	Body	N_Shore	4	75122371	F	0.000258013	0.0330462	0.0945045	0.318792	0.297868	0.294719	0.23189	0.200385	0.195591
cg12630479				N_Shore	17	1077126	F	0.000183038	0.031356	0.0944928	0.831876	0.862742	0.859174	0.773011	0.749051	0.748252
cg05020759					8	16284611	R	3.26806e-05	0.0269557	0.0944877	0.84798	0.83667	0.837521	0.754719	0.753183	0.730806
cg21395077	C9orf27	NR_024032	TSS200		9	117727286	R	2.75586e-05	0.0269557	0.0944558	0.775441	0.796133	0.770233	0.684921	0.690187	0.68333
cg26271970	GRID1	NM_017551	Body	S_Shelf	10	88015535	R	0.000453324	0.0374074	0.0944474	0.645278	0.679583	0.696821	0.584863	0.576939	0.576537
cg22223402	FAM55D	NM_001077639	TSS1500		11	113972325	F	3.96764e-05	0.0269557	0.0944206	0.784599	0.774738	0.788022	0.695416	0.696663	0.672018
cg00214970	SPHKAP	NM_030623	TSS1500	S_Shore	2	228755945	R	3.36232e-05	0.0269557	0.094417	0.660921	0.681083	0.656049	0.57764	0.564343	0.572817
cg11664283					4	183146536	R	0.000356813	0.035481	0.0943719	0.801813	0.845085	0.801371	0.723119	0.723986	0.718048
cg06539116	ABLIM3	NM_014945	Body		5	148577558	R	0.00078077	0.0441952	0.0943428	0.731959	0.722464	0.763735	0.645005	0.62447	0.665654
cg16892812					7	121583602	F	0.000870788	0.0455461	0.0943419	0.756105	0.793391	0.746224	0.658109	0.69114	0.663446
cg10319640	SERPINA3	NM_001085	3'UTR		14	94160137	R	4.92325e-06	0.0269557	0.0943093	0.765103	0.766781	0.776181	0.672181	0.671312	0.681644
cg18404041	ITIH1	NM_001166435	Body		3	52799323	R	0.00071255	0.0426147	0.0942939	0.580192	0.632093	0.616676	0.529232	0.509787	0.50706
cg24319836	ANGPTL6	NM_031917	TSS200	N_Shelf	19	10074465	R	0.00032252	0.0344885	0.0942839	0.609931	0.609481	0.627969	0.544582	0.499865	0.520082
cg08148801	DLC1	NM_182643	Body	S_Shore	8	13036941	R	6.20052e-05	0.0269557	0.0942734	0.85033	0.879938	0.855583	0.774922	0.761403	0.766705
cg00305993					15	73903670	R	0.00108119	0.0493125	0.0942722	0.783376	0.81273	0.822352	0.683856	0.721476	0.73031
cg01252713					2	235214328	F	0.000241161	0.032789	0.0942715	0.855365	0.857039	0.838847	0.775851	0.758486	0.7341
cg12018888					6	106689911	R	0.000311371	0.0342828	0.094239	0.778882	0.823014	0.81307	0.708271	0.719888	0.70409
cg15284794	VCL	NM_003373	Body		10	75460304	F	0.000381529	0.0359506	0.0942253	0.867059	0.899686	0.880472	0.805202	0.792738	0.766601
cg24332570	ANK3	NM_020987	Body		10	61753033	R	0.000460448	0.0374534	0.0942205	0.855502	0.861444	0.820716	0.768687	0.739991	0.746323
cg26388707	OCA2	NM_000275	3'UTR		15	25673962	F	0.000155039	0.0305139	0.094203	0.794418	0.816441	0.829398	0.707479	0.730566	0.719603
cg06473675	ASB18	NM_212556	TSS1500		2	236838811	R	0.000170507	0.0308336	0.0942004	0.57502	0.614564	0.581016	0.494693	0.499734	0.493571
cg00948900	OLFM1	NM_014279	Body	N_Shore	9	137137026	R	0.000617682	0.040773	0.0941851	0.662602	0.704786	0.676098	0.577093	0.608263	0.575576
cg26554326				S_Shelf	16	34118939	F	0.000367621	0.035653	0.0941477	0.673146	0.698601	0.672606	0.572478	0.578591	0.610841
cg14098737	ODZ4	NM_001098816	5'UTR		11	78631915	F	9.09873e-05	0.0284311	0.0940949	0.776821	0.779667	0.806413	0.684885	0.703201	0.69253
cg17664182	CRTAC1	NM_018058	Body		10	99686250	F	6.35356e-06	0.0269557	0.0940799	0.856741	0.854424	0.868952	0.760967	0.770113	0.766798
cg18753619					5	174562552	R	3.34864e-05	0.0269557	0.0940778	0.755112	0.783105	0.77455	0.679686	0.678062	0.672786
cg24728698					15	94882357	F	0.00107884	0.0492909	0.0940675	0.68871	0.714327	0.6837	0.595632	0.631269	0.577634
cg12008054					13	52638192	F	0.000202097	0.0320018	0.0940667	0.82454	0.805971	0.847796	0.733085	0.739181	0.72384
cg03986311				S_Shore	1	177823844	R	0.000223359	0.0326109	0.0939679	0.718907	0.751858	0.753708	0.657971	0.634932	0.649667
cg04919425					2	5468766	F	9.42988e-05	0.0284616	0.0939363	0.829858	0.857086	0.86557	0.754656	0.759888	0.756162
cg13860283	OR9K2	NM_001005243	1stExon		12	53810309	F	0.00100708	0.0480066	0.0938772	0.698523	0.692122	0.666061	0.621337	0.582042	0.571695
cg10868668					4	38283337	F	0.000310549	0.0342577	0.0938373	0.735407	0.767667	0.763226	0.641944	0.670456	0.672389
cg18412889	ALDH3B1	NM_001161473	Body	N_Shore	11	67544701	F	0.000156656	0.0305512	0.0938159	0.682788	0.662759	0.667178	0.56321	0.597762	0.570306
cg11958234					1	118028351	F	9.66995e-06	0.0269557	0.0937954	0.898869	0.896384	0.905796	0.81481	0.80821	0.796643
cg04967410	KIAA0513	NM_014732	5'UTR		16	83632577	F	0.000853296	0.0453611	0.0937808	0.682097	0.706887	0.690814	0.630934	0.580121	0.5874
cg13126790					6	159930336	R	0.000308975	0.0342318	0.0937799	0.706844	0.729023	0.712799	0.600582	0.623173	0.643571
cg10104336					12	19816358	R	0.000614786	0.0407415	0.0937229	0.828721	0.834455	0.835749	0.770938	0.728622	0.718197
cg20439656				Island	18	74291799	R	1.99013e-05	0.0269557	0.0937082	0.819794	0.838442	0.830873	0.732008	0.729919	0.746057
cg05409693					12	77204271	F	0.000256623	0.0330181	0.093692	0.76198	0.774546	0.770921	0.672795	0.699161	0.654416
cg12150401	TAS2R16	NM_016945	1stExon		7	122422758	F	1.15078e-05	0.0269557	0.0936697	0.826268	0.82887	0.837635	0.747594	0.729943	0.734226
cg01967642	EPHA10	NM_173641	Body	N_Shore	1	38002063	F	0.000162415	0.0307284	0.0936674	0.675463	0.649005	0.638956	0.571597	0.557887	0.552938
cg02320356					8	127306288	F	0.000504418	0.0384178	0.0936629	0.739796	0.740263	0.764343	0.674566	0.629274	0.659572
cg13355129					12	56923701	F	0.00027622	0.0334422	0.0936398	0.727017	0.756174	0.773601	0.657579	0.662258	0.656036
cg03092482	TBC1D16	NM_019020	Body	N_Shelf	17	75563730	F	4.58574e-05	0.0269557	0.0936352	0.85325	0.846558	0.853918	0.742596	0.773261	0.756963
cg10868277	MYF5	NM_005593	Body	S_Shore	12	79635689	F	0.00018556	0.0313812	0.0936331	0.803354	0.832639	0.808632	0.718363	0.737703	0.70766
cg19451848					5	42212563	R	0.000811933	0.0446609	0.0936321	0.731339	0.782973	0.77001	0.656979	0.664193	0.682254
cg09027255					1	2786053	F	0.000903312	0.0461141	0.0936315	0.80147	0.823604	0.831646	0.73156	0.747791	0.696475
cg16672668	ACTN2	NM_001103	Body		1	234965497	R	0.000257409	0.0330377	0.093616	0.823992	0.859103	0.831476	0.749156	0.756054	0.728514
cg25714147	THSD7B	NM_001080427	TSS1500		2	137464452	R	0.000525318	0.0388725	0.093607	0.867407	0.833008	0.868276	0.757744	0.782912	0.747215
cg06213004				N_Shore	11	134037497	F	0.000120854	0.0291649	0.0935791	0.806697	0.835174	0.801112	0.715625	0.71699	0.729631
cg10453777					13	61143230	F	7.4937e-05	0.0272175	0.0935448	0.744375	0.750674	0.739932	0.670411	0.646195	0.637741
cg01208557	NTM	NM_001144059	Body		11	131444663	F	9.61295e-05	0.0284616	0.0935282	0.826684	0.837639	0.85951	0.743118	0.742375	0.757755
cg08015382					6	12473885	F	0.00103014	0.0484469	0.0935264	0.566821	0.615094	0.623285	0.50219	0.5162	0.50623
cg01556466	ADCYAP1R1	NM_001118	Body		7	31112785	F	2.20121e-05	0.0269557	0.0935238	0.650544	0.632455	0.651124	0.545857	0.560107	0.547587
cg04812644	LOC286094	NR_026706	Body		8	136371182	R	0.000930006	0.0466172	0.0935209	0.844701	0.837029	0.804798	0.740319	0.754598	0.711048
cg26281107					4	188164160	F	0.000740931	0.0432895	0.0935208	0.651619	0.686297	0.690731	0.591814	0.559857	0.596413
cg01856509	GRID1	NM_017551	Body	S_Shore	10	88015235	R	0.000892554	0.0458966	0.0934833	0.741795	0.768475	0.790176	0.659177	0.694072	0.666746
cg21193660				N_Shelf	5	1251257	R	0.000567199	0.0397831	0.0934802	0.67386	0.684215	0.679236	0.615509	0.578834	0.562527
cg16284238					6	87253314	R	0.000234771	0.0327587	0.0934796	0.804181	0.820734	0.831331	0.73146	0.704614	0.739733
cg01337047	DSG1	NM_001942	TSS1500		18	27151111	R	0.000182473	0.0313268	0.0934382	0.697704	0.70998	0.707191	0.634994	0.603653	0.595912
cg22104744	RASA3	NM_007368	Body		13	113847935	R	0.000223611	0.0326109	0.0934035	0.537783	0.566461	0.554118	0.474398	0.440195	0.463558
cg25600410	MFSD4	NM_181644	Body		1	203817292	F	0.000266072	0.0333192	0.0933757	0.827123	0.837074	0.850344	0.72166	0.760169	0.752585
cg02529909	F2RL2	NM_004101	TSS1500		5	75955606	R	0.000634338	0.0410744	0.0933469	0.760842	0.710851	0.735215	0.62747	0.652516	0.646881
cg03316570	LOC100132354	NR_024478	Body		6	43985635	R	0.000280449	0.0334824	0.0932947	0.771238	0.802073	0.809456	0.694624	0.715184	0.693075
cg02091100	GUCA1A	NM_000409	TSS200		6	42231007	R	7.20969e-05	0.0269557	0.0932694	0.865401	0.863661	0.846685	0.781678	0.758096	0.756164
cg15496866	LRFN2	NM_020737	5'UTR		6	40599568	F	0.00048173	0.0379228	0.0931998	0.752313	0.782599	0.738535	0.673018	0.672513	0.648316
cg09689895	SPP2	NM_006944	Body		2	234639592	F	0.000243613	0.0328065	0.0931726	0.706913	0.741646	0.748788	0.644702	0.638743	0.634384
cg11550064	HDAC4	NM_006037	Body		2	239813128	R	0.000440325	0.0371668	0.0931611	0.870356	0.895027	0.886873	0.816867	0.782149	0.773756
cg25769127				N_Shelf	3	61518063	F	3.88119e-05	0.0269557	0.0931577	0.749869	0.727996	0.730344	0.653502	0.638459	0.636776
cg15001714				Island	1	48232400	R	0.000434046	0.0370097	0.0931274	0.790475	0.752725	0.798462	0.693563	0.677241	0.691477
cg06155697	TUB	NM_177972	Body		11	8076972	R	5.89425e-05	0.0269557	0.0931185	0.833044	0.849348	0.833759	0.750598	0.756372	0.729825
cg21977522					3	111733369	F	0.000252666	0.032974	0.0930599	0.689802	0.707505	0.673535	0.603572	0.608761	0.579329
cg25730428	MAS1L	NM_052967	1stExon		6	29562734	F	0.00043229	0.0369637	0.0930494	0.714795	0.702685	0.697533	0.640027	0.596003	0.599834
cg01569875	SYT17	NM_016524	Body	N_Shore	16	19101841	F	0.000363422	0.0355752	0.0930394	0.803391	0.812366	0.838392	0.744828	0.714672	0.715531
cg22862319	PRDM16	NM_022114	Body		1	3279854	R	0.000202529	0.0320018	0.0930244	0.824742	0.853188	0.831148	0.745539	0.726109	0.758356
cg19272150	PRG1	NR_026881	TSS1500		19	48543627	R	1.658e-05	0.0269557	0.0930054	0.810867	0.821496	0.83053	0.72464	0.735976	0.723261
cg14574066					11	68740718	R	0.000236038	0.0327587	0.0929785	0.782493	0.791275	0.808388	0.682001	0.719137	0.702083
cg20955839	SULT1C2	NM_001056	Body		2	108289245	R	0.000141307	0.0299639	0.092978	0.742295	0.752114	0.722012	0.638309	0.661289	0.63789
cg21199495	EFNA3	NM_004952	3'UTR	S_Shore	1	153325786	R	0.000502198	0.0383553	0.092895	0.600618	0.592888	0.56157	0.486769	0.511109	0.478513
cg16780603	NOSTRIN	NM_001171631	5'UTR		2	169367293	R	6.21532e-05	0.0269557	0.0928948	0.918967	0.898514	0.905032	0.829823	0.805475	0.808531
cg04147940					8	69943594	R	0.000615492	0.0407423	0.0928905	0.616164	0.603776	0.567093	0.515646	0.498279	0.494437
cg06580966	A2BP1	NM_001142334	Body		16	7624064	R	0.000387552	0.0360479	0.0928673	0.71001	0.704446	0.732809	0.642094	0.601566	0.625003
cg15352186	ADAM2	NM_001464	TSS200		8	39815064	R	0.00013801	0.0297636	0.0928648	0.808053	0.841262	0.80931	0.73112	0.730812	0.718099
cg13974761	LCE2A	NM_178428	TSS1500		1	150937222	R	1.83183e-05	0.0269557	0.0928341	0.656991	0.674882	0.665571	0.571022	0.565587	0.582333
cg12358050					2	240958671	F	1.01954e-05	0.0269557	0.092812	0.725416	0.735534	0.726628	0.641873	0.641029	0.62624
cg07235935	NDST4	NM_022569	Body		4	116184110	F	3.95655e-05	0.0269557	0.0928054	0.747862	0.744924	0.764983	0.669555	0.648589	0.66121
cg03639429				N_Shore	7	55037805	R	1.76218e-05	0.0269557	0.0927824	0.73373	0.724586	0.734258	0.634261	0.629542	0.650423
cg06288900	HS3ST4	NM_006040	Body		16	25775640	R	0.000168626	0.0308008	0.0927414	0.803559	0.82314	0.839938	0.741641	0.725159	0.721613
cg00059652					17	65117093	F	0.000338215	0.0348361	0.0927399	0.816859	0.834678	0.852529	0.740995	0.725599	0.759252
cg22847608	CRYBA4	NM_001886	TSS200		22	25347854	R	2.79774e-06	0.0269557	0.0927302	0.759024	0.767264	0.764372	0.675218	0.666641	0.670611
cg08099115	ERC2	NM_015576	3'UTR		3	55624487	R	0.000162168	0.0307284	0.092726	0.719356	0.690189	0.722238	0.626179	0.622188	0.605238
cg26367719	FAM71E2	NM_001145402	TSS1500	S_Shore	19	60567417	F	0.00029875	0.0338682	0.0927081	0.744058	0.784068	0.761851	0.655893	0.675548	0.680412
cg05339415				S_Shore	14	104178504	R	0.000390048	0.036058	0.0926507	0.695726	0.726997	0.684531	0.622667	0.608701	0.597934
cg02131862	KRTAP24-1	NM_001085455	1stExon		21	30576715	F	2.50386e-05	0.0269557	0.0926502	0.747031	0.762757	0.772555	0.67108	0.663841	0.669471
cg03988297					1	217127170	F	0.000138316	0.0297636	0.0926408	0.655569	0.686651	0.658161	0.586171	0.566847	0.569441
cg13313339	LANCL2	NM_018697	Body		7	55459154	R	0.000859496	0.045434	0.0926382	0.849714	0.840558	0.851618	0.774359	0.76859	0.721027
cg23991413	PDE4DIP	NM_022359	Body		1	143715662	R	0.000181302	0.0312887	0.092628	0.825657	0.850856	0.865042	0.762036	0.746474	0.755161
cg15358723	KIF26B	NM_018012	Body	N_Shelf	1	243817285	R	0.000866459	0.0454824	0.09262	0.751005	0.777394	0.792909	0.665952	0.705246	0.672249
cg13758186					2	101325568	R	0.000707753	0.0425052	0.0926108	0.772779	0.794422	0.804757	0.676215	0.722995	0.694915
cg17738841					2	30947867	F	0.000541638	0.0391928	0.0926086	0.75714	0.755212	0.770158	0.638987	0.677797	0.687899
cg14353506	CACNA1B	NM_000718	Body	N_Shore	9	139934831	F	0.00107762	0.0492857	0.0925911	0.822643	0.846583	0.842783	0.71183	0.762611	0.759795
cg20311601	MAGI2	NM_012301	Body		7	77904254	R	0.000928343	0.0465902	0.0925818	0.79251	0.837981	0.846471	0.743089	0.726409	0.729719
cg07209821					1	118139518	R	0.000207619	0.0322333	0.0925744	0.806405	0.821384	0.797889	0.713574	0.735632	0.69875
cg23003926	CADPS	NM_003716	Body		3	62510070	F	6.08059e-05	0.0269557	0.0925713	0.767952	0.763478	0.744285	0.654822	0.666322	0.676858
cg09556700	SKI	NM_003036	Body	N_Shore	1	2220528	R	0.000368546	0.035653	0.0925208	0.789089	0.799491	0.826689	0.697802	0.728924	0.71098
cg02828306	LOC221122	NR_026681	TSS1500		11	44951263	R	0.000544975	0.0392596	0.0924948	0.83788	0.818526	0.821333	0.76208	0.721782	0.716393
cg00322618				S_Shelf	5	2812441	R	0.000224218	0.0326109	0.0924736	0.763723	0.803572	0.787246	0.693003	0.702033	0.682083
cg24396875	PMS1	NM_001128143	Body		2	190415209	R	0.00111488	0.0498218	0.0924519	0.788626	0.819711	0.847067	0.721046	0.739343	0.71766
cg09412975					1	216958999	R	0.00061973	0.040773	0.0924451	0.775403	0.820024	0.808612	0.691268	0.716204	0.71923
cg03661324					2	79265425	R	0.000898714	0.0460158	0.0924396	0.780699	0.832994	0.799039	0.719886	0.720065	0.695462
cg27230705	DMBT1	NM_007329	Body		10	124370463	R	0.000387591	0.0360479	0.0923857	0.693124	0.73731	0.714604	0.6128	0.619076	0.636006
cg20033070	MDP1	NM_138476	TSS1500	S_Shelf	14	23755496	R	0.000124559	0.0292042	0.0923364	0.74619	0.763248	0.755615	0.654461	0.650604	0.68298
cg10511357	CAMTA1	NM_015215	Body		1	7118662	R	0.00060857	0.0405974	0.0923147	0.784587	0.818762	0.767183	0.699601	0.705574	0.688412
cg03355808	FRMD4A	NM_018027	Body		10	14342684	R	3.34448e-05	0.0269557	0.0923098	0.798838	0.817079	0.824028	0.716688	0.718276	0.728052
cg12306833				N_Shelf	3	50202393	R	0.000131428	0.029413	0.0922796	0.826824	0.821421	0.852133	0.729017	0.751096	0.743426
cg11827629					12	114306807	R	2.91704e-05	0.0269557	0.0922485	0.782144	0.809254	0.797764	0.706869	0.701364	0.704184
cg22379463					3	45235334	R	3.85124e-05	0.0269557	0.0922214	0.752993	0.776069	0.75657	0.661425	0.677859	0.669683
cg22626985	NRG1	NM_013962	Body		8	31806893	F	0.000368795	0.035653	0.0922049	0.740199	0.759827	0.767444	0.655465	0.64849	0.686901
cg06981887	NPHP4	NM_015102	Body		1	5894082	R	1.44984e-05	0.0269557	0.0921883	0.794025	0.806349	0.810377	0.702604	0.716271	0.715311
cg26538691					1	5228079	F	0.000577804	0.0399757	0.0921498	0.732433	0.777962	0.773344	0.66802	0.680406	0.658864
cg08750326	ODZ1	NM_001163278	TSS1500		X	123925690	F	4.88025e-05	0.0269557	0.0921467	0.621014	0.624498	0.647375	0.533406	0.536877	0.546164
cg10041417	SMOC2	NM_022138	Body	S_Shelf	6	168663796	R	2.03132e-05	0.0269557	0.0921408	0.807979	0.825545	0.811826	0.715087	0.721786	0.732054
cg08832745	FBXL13	NM_145032	Body		7	102318804	F	4.12961e-05	0.0269557	0.0921337	0.863326	0.857055	0.85362	0.768089	0.778935	0.750576
cg21934189					7	67890744	R	0.000156633	0.0305512	0.0921304	0.777861	0.789247	0.760878	0.693236	0.691629	0.66673
cg24254196	CHSY1	NM_014918	Body		15	99537046	F	0.000202052	0.0320018	0.0920821	0.86637	0.888138	0.890015	0.802861	0.795593	0.769822
cg03515656	IFT140	NM_014714	Body	S_Shore	16	1540305	F	0.000238913	0.0327587	0.0920648	0.774238	0.815949	0.808182	0.711603	0.707374	0.703198
cg03447013					4	31186405	F	7.1973e-05	0.0269557	0.0920565	0.7477	0.739217	0.756395	0.661888	0.638634	0.66662
cg13803727					9	88635067	R	0.000161211	0.0307112	0.0920494	0.654328	0.669808	0.669277	0.551121	0.586485	0.57966
cg07666840	FGF1	NM_033136	5'UTR		5	142045945	R	6.28561e-05	0.0269557	0.0920335	0.484368	0.499318	0.48814	0.381959	0.410363	0.403404
cg16673806	KDM3B	NM_016604	3'UTR		5	137799771	R	0.000696125	0.0422895	0.0920329	0.839865	0.827661	0.817416	0.762415	0.736068	0.710361
cg10962805	CNTNAP5	NM_130773	3'UTR		2	125388580	R	0.000105797	0.0291071	0.0920166	0.743387	0.732041	0.731309	0.637322	0.663426	0.629939
cg14921522	P2RY1	NM_002563	1stExon	S_Shore	3	154036745	F	0.000433845	0.0370084	0.0920086	0.540568	0.581679	0.566872	0.457874	0.467919	0.4873
cg16673052					13	53781770	F	0.000549483	0.0394088	0.0919945	0.841191	0.83256	0.838715	0.720524	0.773439	0.742519
cg13542368					10	95039529	R	0.000234245	0.0327587	0.0919806	0.812153	0.838088	0.799125	0.734311	0.713366	0.725746
cg04018164				N_Shelf	17	12507083	F	5.25148e-06	0.0269557	0.0919628	0.803757	0.806081	0.802426	0.705358	0.710378	0.72064
cg25429137					4	28657903	F	0.000705937	0.0424748	0.0919399	0.740784	0.779151	0.773255	0.650354	0.687173	0.679843
cg24689177	DGKI	NM_004717	Body		7	136881413	F	4.55669e-05	0.0269557	0.0919352	0.711178	0.739259	0.726763	0.633895	0.640149	0.627349
cg27322675	ZNF446	NM_017908	3'UTR	S_Shore	19	63684278	R	0.000350019	0.0352354	0.0919104	0.754219	0.729067	0.747514	0.634012	0.674466	0.646591
cg20001810	KRT75	NM_004693	TSS1500		12	51115583	R	8.69439e-05	0.0279201	0.0919046	0.739033	0.757225	0.769386	0.653127	0.671991	0.664812
cg13247990	MYLK3	NM_182493	5'UTR		16	45339677	F	0.000377807	0.0359047	0.0918682	0.65522	0.690123	0.693955	0.57345	0.59744	0.592803
cg04955333	IQCE	NM_001100390	Body	S_Shore	7	2613940	F	0.000365244	0.035653	0.0918546	0.798387	0.824701	0.797865	0.736483	0.710017	0.698889
cg15217308	ESYT3	NM_031913	Body	S_Shore	3	139654814	R	0.000127386	0.0292137	0.0918529	0.710235	0.741233	0.721091	0.643561	0.620189	0.633251
cg04895895	C1orf198	NM_001136494	TSS1500	S_Shore	1	229072518	F	0.000557669	0.0395658	0.0918453	0.856483	0.872027	0.899129	0.765984	0.788804	0.797317
cg21374754	LYZL4	NM_144634	TSS1500		3	42427866	F	0.000428552	0.036944	0.0918419	0.746514	0.769714	0.758178	0.684585	0.640849	0.673446
cg17427926	LOC283999	NM_001145529	TSS200	N_Shore	17	73738981	F	0.000313759	0.0343041	0.0917986	0.765524	0.803971	0.785591	0.698048	0.677326	0.704316
cg00718539					7	169205	R	8.39175e-05	0.0278128	0.0917649	0.7315	0.757882	0.755855	0.645033	0.663355	0.661555
cg23328335	TNXB	NM_019105	Body		6	32132676	R	0.000375764	0.03585	0.0917544	0.71268	0.734382	0.73337	0.616321	0.630245	0.658602
cg08100122	FAT1	NM_005245	Body		4	187866226	R	0.000102929	0.0289132	0.0917404	0.75734	0.779651	0.761416	0.657827	0.683832	0.681526
cg08762819					11	11714496	F	0.000132446	0.0294435	0.0917205	0.7629	0.731074	0.763451	0.661395	0.667221	0.653648
cg23538703	C3orf30	NM_152539	1stExon		3	120347740	F	0.000149902	0.0303451	0.0917032	0.863198	0.879005	0.864819	0.788349	0.787425	0.756138
cg11856561	SGK1	NM_001143676	Body		6	134673788	F	0.000170848	0.0308336	0.0916976	0.853522	0.862076	0.845809	0.764945	0.779762	0.741607
cg18944984	NR1H4	NM_005123	TSS1500		12	99390697	F	0.000113044	0.029118	0.0916751	0.613071	0.641978	0.62628	0.52137	0.540225	0.544708
cg17971129					6	3811460	F	0.000409943	0.0364049	0.0916509	0.784203	0.802858	0.807093	0.688004	0.700309	0.730888
cg11599142	PATE4	NM_001144874	TSS1500		11	125208059	F	2.05389e-06	0.0269557	0.0915988	0.844384	0.838657	0.837458	0.749438	0.750598	0.745667
cg07800544	PRLR	NM_000949	5'UTR		5	35165144	F	7.00289e-05	0.0269557	0.0915736	0.821613	0.839934	0.829741	0.753803	0.737588	0.725176
cg16456087	OXNAD1	NM_138381	Body		3	16318201	F	4.46531e-05	0.0269557	0.0915461	0.834729	0.852479	0.852646	0.745529	0.767553	0.752134
cg02150582				N_Shore	6	9506295	F	0.000173015	0.030852	0.0915425	0.748142	0.748556	0.720008	0.634495	0.660496	0.647087
cg01014190	NRXN1	NM_004801	Body	N_Shore	2	51107525	R	0.000534957	0.0390697	0.0915318	0.835234	0.872222	0.856803	0.75477	0.785091	0.749802
cg21297772	SLC5A9	NM_001011547	1stExon		1	48461040	F	2.35901e-05	0.0269557	0.0915308	0.742517	0.750567	0.758626	0.670483	0.651046	0.65559
cg15710554	SIL1	NM_001037633	5'UTR		5	138525235	R	0.000553689	0.0394673	0.0915056	0.833801	0.879777	0.859693	0.753256	0.764866	0.780632
cg06071476				N_Shelf	16	22729840	F	3.0883e-05	0.0269557	0.0915019	0.538204	0.553161	0.561309	0.450737	0.463114	0.464317
cg25145360	ALDH3A1	NM_000691	TSS200	S_Shelf	17	19592473	R	2.27048e-05	0.0269557	0.0915007	0.746367	0.763774	0.768745	0.673889	0.666535	0.66396
cg01549929					16	53241215	F	0.000381189	0.0359427	0.0914645	0.801228	0.814385	0.804175	0.729605	0.728114	0.687676
cg00919126					4	187998395	R	0.000116359	0.0291527	0.0914464	0.764007	0.792925	0.777539	0.683754	0.70041	0.675968
cg25277638	PTPRN2	NM_002847	Body		7	157067554	F	7.50253e-05	0.0272195	0.0914282	0.639495	0.660744	0.661162	0.564129	0.549545	0.573442
cg12604192	KCNA10	NM_005549	TSS1500		1	110863650	F	0.000628328	0.0409136	0.0913727	0.839841	0.864505	0.864786	0.789819	0.743091	0.762103
cg11147878	SUSD4	NM_017982	Body		1	221474891	F	5.13475e-05	0.0269557	0.0913723	0.818615	0.803873	0.824292	0.728376	0.733322	0.710966
cg19787070					X	4391263	R	0.000245112	0.0328065	0.0913717	0.80342	0.830595	0.841009	0.727969	0.746744	0.726196
cg12350474					17	43933475	F	0.000905252	0.0461477	0.0913633	0.740625	0.779099	0.756978	0.641778	0.684092	0.676741
cg00624799	ZNF710	NM_198526	5'UTR		15	88406622	R	0.00108699	0.0494115	0.0913472	0.742624	0.796672	0.793019	0.68643	0.679397	0.692447
cg01262413	PTPRN2	NM_002847	Body	S_Shore	7	157384302	R	0.000119629	0.0291649	0.0913262	0.79186	0.824519	0.806441	0.717955	0.725385	0.7055
cg08203210				N_Shelf	6	26261196	F	0.000467833	0.037571	0.0913143	0.845724	0.86609	0.879272	0.785049	0.749889	0.782205
cg10006252					17	2922781	F	0.000651061	0.0413791	0.0912999	0.7802	0.812758	0.778964	0.715665	0.705332	0.677025
cg23469117	YDJC	NM_001017964	TSS1500	S_Shore	22	20315646	F	0.000350224	0.0352354	0.0912996	0.773476	0.805875	0.810859	0.71319	0.690062	0.71306
cg07146912	PDZRN3	NM_015009	Body	N_Shore	3	73754067	R	0.000244971	0.0328065	0.0912562	0.766442	0.79836	0.769839	0.684414	0.674355	0.702104
cg11483884	ODZ2	NM_001122679	Body	N_Shore	5	167621195	R	0.00018595	0.0313812	0.0912335	0.87981	0.865969	0.862672	0.798126	0.776575	0.760049
cg17221083	SPOCK1	NM_004598	Body		5	136402626	F	0.000178462	0.0311205	0.0912312	0.809	0.790754	0.775564	0.686043	0.708929	0.706651
cg26614970					1	116837543	R	0.000395372	0.0361229	0.0912193	0.887174	0.892213	0.905611	0.804956	0.780223	0.826161
cg04107251					8	37021431	F	0.000438213	0.0371243	0.0911776	0.822388	0.849599	0.845646	0.74569	0.769852	0.728559
cg19747271	SCAND3	NM_052923	Body	N_Shore	6	28661369	R	0.000173394	0.030852	0.0911475	0.884675	0.865931	0.904141	0.802792	0.786682	0.79183
cg03744357	LOC442459	NR_024608	TSS1500	S_Shore	X	99082849	R	0.00106842	0.0491437	0.0911252	0.681369	0.716682	0.698014	0.605356	0.633712	0.583621
cg10219995					6	51467390	R	8.48125e-05	0.0278128	0.0911102	0.718484	0.735174	0.711246	0.645197	0.624285	0.622091
cg13767245	SRRM3	NM_001110199	5'UTR	S_Shore	7	75669614	R	8.09545e-05	0.0277514	0.0910733	0.389628	0.402205	0.406054	0.292897	0.323389	0.308381
cg01119374				N_Shore	2	109109396	F	0.000124944	0.0292042	0.0910582	0.807673	0.828174	0.825254	0.738056	0.73882	0.71105
cg27588093	PRDM16	NM_022114	Body	S_Shore	1	3266273	R	0.000545825	0.0392674	0.091038	0.861123	0.858256	0.867378	0.751111	0.800827	0.761706
cg15531386					11	115839289	R	0.000844555	0.0452635	0.0910254	0.710731	0.712943	0.737095	0.654342	0.629502	0.603849
cg15240102				Island	8	1298890	R	0.000112513	0.029118	0.0910155	0.744198	0.761757	0.76312	0.65323	0.68298	0.659819
cg00128482	PI15	NM_015886	5'UTR		8	75900011	R	6.24924e-06	0.0269557	0.0909832	0.708027	0.712339	0.717361	0.613561	0.625794	0.625422
cg01196079	PRDM16	NM_022114	Body	N_Shore	1	3191718	F	0.000449267	0.0373935	0.0909744	0.73414	0.765394	0.736834	0.633614	0.660057	0.669774
cg05329720	COL5A1	NM_000093	Body	N_Shore	9	136858635	F	8.13292e-06	0.0269557	0.0909089	0.761415	0.753416	0.762907	0.67716	0.662954	0.664898
cg11292836	NAV3	NM_014903	Body		12	76886038	F	0.000591282	0.040276	0.0908449	0.699125	0.696224	0.677526	0.617081	0.610998	0.572261
cg05365532	LILRB1	NM_006669	TSS1500		19	59820162	F	0.000710164	0.0426147	0.0908217	0.765232	0.820652	0.795926	0.704893	0.705941	0.698511
cg04422802				S_Shore	19	22237866	R	3.09371e-05	0.0269557	0.0908173	0.764565	0.790823	0.776005	0.684424	0.690969	0.683548
cg25597362	DOK2	NM_003974	Body	N_Shelf	8	21823256	F	0.000105179	0.0291071	0.0908002	0.848405	0.862045	0.876801	0.758036	0.776749	0.780065
cg11474135	ANK2	NM_001127493	Body		4	114152750	F	0.000983418	0.0476534	0.090778	0.808511	0.826243	0.801071	0.752338	0.708155	0.702998
cg23829256				N_Shore	8	1034029	R	0.000171583	0.0308461	0.0907331	0.647222	0.685381	0.671333	0.585593	0.5742	0.571944
cg19672751					12	76677894	F	0.000867178	0.0454896	0.09064	0.825071	0.868427	0.830293	0.7703	0.742313	0.739258
cg09537553	ADAP1	NM_006869	Body	N_Shelf	7	929018	F	0.000472777	0.037681	0.0906284	0.251941	0.277918	0.2833	0.168472	0.169958	0.202844
cg26010655					3	183394443	R	6.25706e-05	0.0269557	0.0906099	0.795914	0.817883	0.812535	0.728149	0.721031	0.705322
cg19971102	HHIPL1	NM_032425	3'UTR		14	99205030	R	0.000844773	0.0452635	0.0905994	0.800778	0.796273	0.838833	0.734915	0.702007	0.727164
cg07527126	SHISA6	NM_207386	Body		17	11106558	F	0.000134428	0.0295344	0.0905885	0.77411	0.807754	0.797124	0.694339	0.712452	0.700431
cg24312105	SLC35F3	NM_173508	Body	S_Shelf	1	232419228	R	2.54477e-05	0.0269557	0.0905743	0.87492	0.861244	0.866384	0.783405	0.764188	0.783231
cg04921646				S_Shore	1	2841362	R	1.49749e-05	0.0269557	0.0905668	0.758179	0.756173	0.753163	0.671731	0.671413	0.652671
cg06036585	ITGB1BP2	NM_012278	TSS200		X	70438187	R	0.00101206	0.048126	0.090559	0.840595	0.895608	0.847754	0.766603	0.771638	0.774039
cg00107629	DGKZ	NM_001105540	Body	Island	11	46345883	R	7.07433e-05	0.0269557	0.0905535	0.34832	0.364563	0.356063	0.25174	0.264417	0.281127
cg19570155	CRIM1	NM_016441	Body		2	36619109	R	0.00029611	0.0338267	0.0904992	0.835951	0.808031	0.832035	0.75411	0.719713	0.730696
cg08001668					11	92310138	F	2.64823e-05	0.0269557	0.0904341	0.753376	0.763831	0.76853	0.669567	0.682906	0.661961
cg09187338					7	130239048	R	0.0010631	0.049036	0.090418	0.677185	0.734249	0.709063	0.609153	0.611815	0.628274
cg08608780					8	89504098	R	0.000116389	0.0291527	0.0903983	0.776592	0.804724	0.783363	0.708654	0.699585	0.685245
cg09646754	WFDC8	NM_181510	Body		20	43640957	R	6.97573e-05	0.0269557	0.090391	0.719854	0.749832	0.726492	0.64571	0.644108	0.635187
cg17783174	SH3BP4	NM_014521	Body	N_Shore	2	235615502	R	9.24896e-05	0.0284616	0.0903749	0.826064	0.812562	0.818956	0.746351	0.713482	0.726624
cg06672160				N_Shelf	5	1752896	R	9.47645e-05	0.0284616	0.0903662	0.789886	0.817463	0.819818	0.726385	0.716039	0.713646
cg07465344	PFN1	NM_005022	Body	N_Shore	17	4790157	F	0.000943514	0.0468564	0.0903599	0.738604	0.768102	0.727125	0.637542	0.677498	0.647711
cg07692929	OLFML1	NM_198474	Body		11	7473839	R	1.37233e-05	0.0269557	0.0903575	0.809856	0.812306	0.821541	0.734427	0.720432	0.717771
cg17442932	NKD2	NM_033120	3'UTR	S_Shore	5	1091605	F	0.000124654	0.0292042	0.0903361	0.74152	0.774215	0.743366	0.668797	0.660107	0.659188
cg09157320	RHBDD1	NM_001167608	Body		2	227558313	R	0.000224338	0.0326109	0.0903207	0.84067	0.856564	0.868637	0.779408	0.768744	0.746756
cg07436701	MMRN2	NM_024756	TSS200		10	88707603	R	0.000186753	0.0313812	0.0903063	0.739828	0.770976	0.777388	0.672347	0.666674	0.678253
cg10326031	IGFBP1	NM_000596	TSS1500	N_Shore	7	45893116	F	0.0006537	0.0414369	0.0902897	0.83074	0.806901	0.856387	0.745344	0.750023	0.727792
cg19718662					7	53778896	R	0.00019619	0.031715	0.0902845	0.718555	0.741953	0.754996	0.65548	0.65271	0.636459
cg11856976	SYT13	NM_020826	Body	N_Shelf	11	45260106	F	4.9611e-05	0.0269557	0.0902773	0.747879	0.750642	0.74547	0.674665	0.653095	0.645399
cg09341796				S_Shore	22	47109148	R	0.000693969	0.0422283	0.0902747	0.716525	0.756328	0.765701	0.662582	0.645242	0.659907
cg08840913	ATAD2B	NM_017552	Body		2	23993437	R	0.000105152	0.0291071	0.0902653	0.66366	0.671604	0.660675	0.589061	0.580628	0.555454
cg22405653	KRTAP21-1	NM_181619	TSS1500		21	31050671	R	0.000253094	0.032974	0.090262	0.806702	0.778395	0.769173	0.701381	0.682066	0.700036
cg07260541					16	49675349	R	0.00036302	0.0355752	0.0902612	0.705935	0.733009	0.721677	0.610404	0.650279	0.629155
cg24174959					7	34495125	F	0.000135862	0.0296691	0.0902361	0.803329	0.804667	0.775197	0.705609	0.713455	0.693421
cg02558120	OR2A5	NM_012365	1stExon		7	143378529	R	0.000987522	0.0477179	0.0901984	0.792282	0.789044	0.777369	0.720016	0.704012	0.664072
cg21653474					6	98368709	R	0.000411136	0.0364211	0.0901913	0.745283	0.770078	0.728006	0.672434	0.651366	0.648993
cg16309325	LMO1	NM_002315	Body		11	8220610	F	0.000539179	0.0391377	0.0901341	0.840738	0.868127	0.884965	0.759029	0.785494	0.778905
cg01108633					7	96737775	R	0.00102771	0.0483911	0.0901303	0.808225	0.8546	0.845046	0.726925	0.761433	0.749122
cg00911881	GATA4	NM_002052	Body	N_Shore	8	11643131	F	0.00017039	0.0308336	0.0901085	0.800774	0.803057	0.799275	0.734421	0.699059	0.6993
cg10517535	GAS7	NM_201432	Body		17	9870423	F	0.000802751	0.0445184	0.0901025	0.735255	0.744104	0.771127	0.666061	0.636123	0.677994
cg11043146	KRTAP22-2	NM_001164434	TSS1500		21	30885821	R	0.000735189	0.0431289	0.0901012	0.87244	0.848972	0.876019	0.799787	0.752097	0.775243
cg26564768	DIP2C	NM_014974	Body	S_Shore	10	337227	F	6.00455e-05	0.0269557	0.0900927	0.815262	0.830684	0.824221	0.74956	0.724897	0.725431
cg14188401				S_Shelf	3	135580374	R	0.000335656	0.0347955	0.0900864	0.710287	0.748078	0.709867	0.638449	0.637141	0.622384
cg03069737	LRWD1	NM_152892	TSS1500	N_Shore	7	101891302	R	0.000528088	0.0389468	0.0900832	0.841961	0.852801	0.830721	0.768114	0.762487	0.724631
cg04565740				N_Shore	10	59535625	F	0.000227206	0.0327462	0.090081	0.539714	0.539269	0.544165	0.47077	0.45419	0.427945
cg01178854				S_Shelf	1	153180368	F	0.000368874	0.035653	0.090071	0.810383	0.853743	0.83077	0.738834	0.73254	0.753309
cg02668177	NCKAP5	NM_207363	Body		2	133449711	F	0.000366321	0.035653	0.0900521	0.864867	0.853583	0.850355	0.74646	0.7913	0.760889
cg24803346	SFXN5	NM_144579	Body		2	73054985	F	0.000695756	0.042285	0.09005	0.753117	0.776738	0.804989	0.692408	0.677318	0.694968
cg21512179					2	85825059	F	0.00049227	0.0380853	0.0900335	0.786121	0.829141	0.825714	0.71276	0.728971	0.729145
cg26324057				N_Shelf	2	87420274	F	9.44067e-05	0.0284616	0.0899977	0.860179	0.887225	0.855377	0.78322	0.775402	0.774165
cg16960593	LPA	NM_005577	TSS200		6	161007563	R	0.000155412	0.0305139	0.0899964	0.78059	0.81398	0.781397	0.70404	0.70677	0.695167
cg15110243	ODZ4	NM_001098816	Body		11	78179392	F	5.61762e-05	0.0269557	0.0899888	0.761226	0.786748	0.768257	0.690249	0.672935	0.683081
cg26888623	ZFAND3	NM_021943	Body		6	37979298	R	0.000386508	0.0360479	0.0899715	0.807382	0.785092	0.768847	0.697194	0.71194	0.682273
cg01150918				S_Shelf	2	130064495	R	0.000140961	0.0299386	0.0899625	0.617191	0.637744	0.656	0.548582	0.548089	0.544376
cg06943309				N_Shore	1	161659106	R	2.23587e-05	0.0269557	0.0899542	0.83669	0.833785	0.849086	0.751522	0.739776	0.758401
cg12416080	LRRC3B	NM_052953	5'UTR		3	26725859	R	9.65704e-05	0.0284616	0.0899539	0.835268	0.831274	0.834108	0.763717	0.729795	0.737276
cg23328194	ADRA1A	NM_033302	Body		8	26743879	R	0.000274301	0.0334418	0.0899328	0.711878	0.753958	0.736023	0.652936	0.642125	0.636999
cg13840174	IGSF21	NM_032880	Body	S_Shore	1	18566049	R	8.2805e-05	0.0278128	0.0899324	0.726176	0.758231	0.751657	0.655716	0.658852	0.651699
cg18375236	VSTM2B	NM_001146339	Body	S_Shelf	19	34716546	R	0.000148079	0.0302148	0.0899311	0.640598	0.672023	0.660093	0.557551	0.580587	0.564782
cg15404043				N_Shelf	11	89317590	R	0.000357643	0.035481	0.0898889	0.640606	0.684123	0.65782	0.56006	0.574371	0.578452
cg16527552	TMEM145	NM_173633	TSS1500	N_Shore	19	47507885	R	1.69188e-05	0.0269557	0.0898804	0.818939	0.828864	0.833109	0.734142	0.747057	0.730073
cg22207672					7	136465767	R	0.000118313	0.0291527	0.0898658	0.733089	0.742586	0.756369	0.667661	0.656244	0.638542
cg07456480	ACCN1	NM_001094	Body		17	29156830	R	0.000111758	0.029118	0.0898473	0.733586	0.759772	0.743832	0.665378	0.641068	0.661201
cg20897479					11	12249153	R	0.000198079	0.031819	0.0898313	0.868216	0.855054	0.852902	0.790869	0.761377	0.754432
cg16433258	LAMA1	NM_005559	Body	N_Shelf	18	7104654	R	0.000898674	0.0460158	0.0898174	0.752559	0.782421	0.771699	0.656743	0.705918	0.674566
cg03789606	LOC442459	NR_024608	Body		X	98886260	R	0.000408929	0.036372	0.0898106	0.699727	0.73549	0.722586	0.642322	0.610605	0.635444
cg02818170					19	3287941	R	0.000271277	0.0334099	0.0897807	0.807828	0.815064	0.782154	0.721576	0.718823	0.695303
cg24915592					13	109117579	F	0.000426202	0.0368308	0.0897605	0.7005	0.733265	0.746056	0.627936	0.643495	0.639108
cg05684266					3	151307885	F	7.9478e-05	0.0276313	0.0897324	0.826422	0.843321	0.83147	0.727004	0.752833	0.752178
cg00832581				S_Shelf	7	55043888	R	0.000232219	0.0327587	0.0897249	0.748436	0.771597	0.74454	0.655995	0.683741	0.655663
cg03707955	RORA	NM_134261	Body		15	59024368	R	0.000108462	0.0291071	0.0897193	0.718318	0.750495	0.748581	0.653249	0.646884	0.648104
cg07376029	GC	NM_000583	TSS1500		4	72869856	R	0.000287357	0.0336492	0.0897119	0.78532	0.817619	0.819584	0.709984	0.731877	0.711526
cg03021296	PTPRN2	NM_002847	Body	N_Shore	7	157753375	F	0.000456363	0.0374074	0.0897053	0.745338	0.761876	0.741562	0.634555	0.666565	0.678541
cg27054084	CSNK1G3	NM_001044722	5'UTR	S_Shelf	5	122879680	F	8.85665e-05	0.0281629	0.0896968	0.608971	0.614381	0.631642	0.531824	0.514425	0.539655
cg06629644	GPR133	NM_198827	Body	N_Shelf	12	130136445	R	5.01862e-05	0.0269557	0.0896949	0.754417	0.776374	0.782285	0.681853	0.676807	0.68533
cg00398500	SLC2A9	NM_001001290	1stExon		4	9650874	R	4.64071e-05	0.0269557	0.0896927	0.742205	0.750203	0.738089	0.669205	0.649151	0.643062
cg20769487	MEGF6	NM_001409	Body		1	3513460	R	0.00018052	0.0312471	0.0896768	0.822186	0.823961	0.841689	0.759386	0.733397	0.726022
cg19435526	LRRC8E	NM_025061	3'UTR	S_Shore	19	7871813	F	0.000425921	0.0368308	0.0896467	0.70922	0.708364	0.737606	0.621026	0.6155	0.649723
cg08412584	PDE10A	NM_001130690	Body		6	165917812	R	0.00110355	0.0496861	0.089632	0.703369	0.734507	0.685484	0.636196	0.601228	0.61704
cg11708116				S_Shore	6	169168258	F	0.000328838	0.0346328	0.0896285	0.788381	0.775343	0.786061	0.670822	0.715568	0.69451
cg20813798					17	72504537	F	8.32067e-05	0.0278128	0.0896058	0.846559	0.864449	0.852456	0.762739	0.780473	0.751435
cg02060465	SPRR4	NM_173080	TSS1500		1	151208351	F	0.000404355	0.036217	0.0895853	0.759943	0.774664	0.786043	0.661629	0.70252	0.687745
cg23708209					15	86644903	F	0.000365666	0.035653	0.0895775	0.803329	0.803258	0.80064	0.711007	0.737611	0.689877
cg18584639					5	103094876	F	0.000939249	0.0467608	0.0895315	0.679547	0.716047	0.681047	0.592872	0.626559	0.588616
cg22202689				N_Shore	19	53990039	R	0.000768497	0.0439321	0.0895301	0.681068	0.718365	0.735972	0.622804	0.620534	0.623476
cg00937286	LOC286094	NR_026706	TSS1500		8	136314296	F	0.000386757	0.0360479	0.0895248	0.842348	0.877416	0.844024	0.774704	0.771517	0.748992
cg03333253	CAPN11	NM_007058	TSS1500		6	44233671	F	0.000133417	0.0294877	0.0895218	0.851672	0.842227	0.843492	0.735464	0.770839	0.762523
cg23078228	MIR548A2	NR_030317	Body		3	64686424	R	0.000450954	0.0374074	0.0894826	0.82184	0.847055	0.823082	0.753973	0.717393	0.752163
cg00407150	HHATL	NM_020707	5'UTR		3	42718798	R	5.92299e-05	0.0269557	0.0894697	0.79519	0.787779	0.781854	0.682601	0.710129	0.703683
cg04556646	PHF21B	NM_138415	Body	N_Shore	22	43689242	R	4.61915e-05	0.0269557	0.0894512	0.667586	0.679104	0.681709	0.584106	0.600673	0.575266
cg16110704				S_Shelf	1	240291395	R	7.78094e-05	0.0275776	0.0894331	0.579456	0.612685	0.59678	0.50341	0.509826	0.507386
cg18367124					14	103815051	R	0.000271228	0.0334099	0.0894259	0.746401	0.770127	0.744228	0.667689	0.679338	0.645451
cg01348055	GRIN2A	NM_001134407	Body	N_Shore	16	10180289	R	2.05214e-05	0.0269557	0.0893875	0.756148	0.760167	0.738353	0.65859	0.663656	0.664258
cg23744121	OCA2	NM_000275	Body	N_Shore	15	25920660	R	0.000281248	0.0335172	0.0893765	0.760542	0.792123	0.773433	0.668764	0.700558	0.688647
cg15015416	FRMPD2	NM_001042512	Body		10	49048927	F	0.00020044	0.0319834	0.0893671	0.799177	0.830331	0.817122	0.722434	0.741641	0.714454
cg01714756	SERPINA6	NM_001756	Body		14	93850153	F	0.000232464	0.0327587	0.0893653	0.694255	0.726007	0.697281	0.613743	0.630368	0.605336
cg14596967	ZBTB16	NM_006006	Body	S_Shelf	11	113462154	R	0.000344148	0.0350035	0.0893631	0.800061	0.788682	0.822008	0.73025	0.714975	0.697438
cg03431524	AGFG2	NM_006076	Body		7	99980377	F	0.000330791	0.034671	0.0893623	0.71282	0.749474	0.751043	0.639787	0.647891	0.657571
cg18578080					6	82462505	R	5.22714e-05	0.0269557	0.0893348	0.87064	0.877642	0.855223	0.790165	0.771098	0.774239
cg02422603	RASA3	NM_007368	Body		13	113908668	R	0.000640308	0.0411481	0.0893168	0.843082	0.864612	0.883969	0.755801	0.777411	0.7905
cg21556967	NPY2R	NM_000910	5'UTR	S_Shelf	4	156352115	F	0.000400545	0.0361387	0.08931	0.663508	0.709441	0.685624	0.602695	0.587628	0.600319
cg02608831					8	74019428	R	0.000102243	0.0288916	0.0893081	0.718868	0.723412	0.75122	0.640398	0.638586	0.646592
cg24030173	GRIN2D	NM_000836	Body	S_Shelf	19	53613952	F	0.000118002	0.0291527	0.0892386	0.423007	0.403406	0.414055	0.325552	0.307847	0.339353
cg11471262	RGS12	NM_198229	Body	Island	4	3288709	F	0.000126633	0.0292137	0.0891625	0.862941	0.862872	0.875694	0.760568	0.778143	0.795307
cg13606255	TNXB	NM_019105	Body	N_Shore	6	32161078	R	0.000705845	0.0424748	0.0891586	0.686073	0.702817	0.723226	0.617017	0.593723	0.6339
cg14269525					14	97283784	R	0.000425956	0.0368308	0.0891582	0.814951	0.817615	0.828114	0.754626	0.731214	0.707365
cg26581449				S_Shore	15	87086809	F	0.000120285	0.0291649	0.0891547	0.741443	0.775837	0.765328	0.674138	0.676235	0.66477
cg13820205	PRRX2	NM_016307	Body		9	131487861	R	0.000108426	0.0291071	0.0890676	0.833189	0.86593	0.859183	0.760744	0.770234	0.760122
cg24691792	C20orf202	NM_001009612	TSS200		20	1131986	R	6.17065e-05	0.0269557	0.0890537	0.767285	0.792966	0.769818	0.695397	0.680875	0.686635
cg02680398	CSMD1	NM_033225	Body		8	4616932	R	0.000655858	0.0414821	0.0890503	0.635499	0.663465	0.673323	0.55657	0.558843	0.589722
cg25378181	BAHCC1	NM_001080519	Body	N_Shore	17	77006085	F	0.000290667	0.0337564	0.0890285	0.77215	0.794843	0.809703	0.708724	0.688943	0.711944
cg16964728	RORA	NM_134261	Body		15	59127816	R	0.000161978	0.0307284	0.0890152	0.79942	0.8309	0.79876	0.712429	0.727607	0.721999
cg22941315	TNR	NM_003285	5'UTR		1	173777882	F	0.000401748	0.036164	0.0890057	0.845415	0.843127	0.869068	0.782523	0.743422	0.764648
cg12636543					8	137947198	F	0.000942592	0.0468564	0.0889636	0.725045	0.714917	0.724559	0.662784	0.606045	0.628802
cg22211507	TRAT1	NM_016388	Body		3	110047561	F	6.77492e-05	0.0269557	0.0889496	0.719845	0.740807	0.718789	0.625409	0.644012	0.643171
cg06070229	EXOC4	NM_021807	Body		7	132999366	R	0.000322879	0.0344885	0.0889455	0.850646	0.888691	0.863982	0.793457	0.769964	0.773063
cg14646983					9	34592974	R	0.000679366	0.0419707	0.0888938	0.644833	0.691625	0.656775	0.589391	0.569355	0.567805
cg21004654					11	73399744	R	0.000512054	0.038592	0.0888607	0.900932	0.919067	0.939741	0.81216	0.843133	0.837863
cg13692649	PRDM16	NM_199454	3'UTR	N_Shore	1	3340418	R	0.000108402	0.0291071	0.0888441	0.854684	0.860508	0.85438	0.766669	0.750405	0.785966
cg06085579	PLD1	NM_001130081	5'UTR		3	172992516	R	0.00012417	0.0292042	0.0888423	0.751139	0.78735	0.769291	0.675511	0.680871	0.684872
cg08398005	TNS3	NM_022748	Body		7	47311133	R	7.64588e-05	0.0273684	0.0888387	0.967285	0.975636	0.948809	0.886079	0.869376	0.869759
cg01630588					16	64527943	R	5.09594e-05	0.0269557	0.0888208	0.838702	0.863013	0.858542	0.77295	0.763528	0.757317
cg03496533	PRR15L	NM_024320	TSS200		17	43390182	F	0.000942025	0.0468401	0.0888194	0.784187	0.828197	0.837635	0.721501	0.731832	0.730228
cg20210637	SNPH	NM_014723	TSS1500	N_Shore	20	1194100	F	0.000554596	0.0394749	0.0888155	0.881734	0.916661	0.920236	0.814665	0.80408	0.833438
cg01629545	SLC6A18	NM_182632	Body	N_Shore	5	1284351	F	0.000313134	0.0342828	0.0887951	0.702397	0.731212	0.733583	0.624851	0.625035	0.650921
cg17482368	LRP3	NM_002333	3'UTR	S_Shore	19	38390710	R	0.000865544	0.0454761	0.0887853	0.819797	0.824119	0.802063	0.727449	0.752102	0.700072
cg04444661	LIFR	NM_001127671	5'UTR	N_Shelf	5	38588709	R	0.00029251	0.0337564	0.0887783	0.793768	0.834742	0.807669	0.71352	0.730436	0.725887
cg14691963	WWTR1	NM_015472	Body		3	150805349	F	8.73613e-06	0.0269557	0.0887746	0.891257	0.889975	0.878731	0.795157	0.804569	0.793915
cg16242219	DIO3OS	NR_002770	Body		14	101091504	R	0.000331637	0.0347251	0.0887561	0.891063	0.895337	0.907571	0.833568	0.801714	0.792421
cg13518968					8	20182658	R	6.79385e-05	0.0269557	0.0887318	0.843334	0.816652	0.836892	0.749628	0.734065	0.74699
cg23629820	ACOX3	NM_001101667	Body	N_Shore	4	8425329	R	1.97102e-05	0.0269557	0.0887247	0.838699	0.828605	0.824234	0.752287	0.736378	0.736699
cg19433175				S_Shelf	21	9910395	F	6.50358e-06	0.0269557	0.0887212	0.508067	0.519469	0.510238	0.427214	0.426607	0.41779
cg01764046	HCRTR1	NM_001525	TSS1500	N_Shore	1	31855164	F	0.00023059	0.0327478	0.0886575	0.840131	0.831217	0.856514	0.7725	0.750741	0.738649
cg10686758	KRTAP4-12	NM_031854	3'UTR		17	36533261	F	6.91156e-05	0.0269557	0.0886336	0.735644	0.75901	0.763881	0.670183	0.664391	0.658061
cg06817455					1	210693097	F	0.00100777	0.0480133	0.0886202	0.45188	0.481879	0.505576	0.380352	0.403867	0.389255
cg17382459	NLRP4	NM_134444	1stExon		19	61040028	F	0.000362298	0.0355752	0.0886118	0.846385	0.851188	0.867999	0.761735	0.748714	0.789288
cg25338000	FAM19A5	NM_015381	Body	Island	22	47475363	F	0.000210113	0.032302	0.0886001	0.869243	0.896319	0.887088	0.79722	0.779054	0.810576
cg06401614	TSPAN18	NM_130783	Body		11	44884552	F	0.000184288	0.0313678	0.0886001	0.774562	0.795962	0.796747	0.690798	0.691696	0.718977
cg10310168					1	4276240	F	0.000624015	0.040773	0.0885832	0.749219	0.790839	0.767029	0.673779	0.699103	0.668455
cg21518947	CABP4	NM_145200	TSS200		11	66979224	R	0.000705133	0.0424509	0.0885429	0.767828	0.80598	0.815309	0.701444	0.702199	0.719845
cg07685034	PCBP3	NM_020528	TSS1500		21	46094055	F	0.000281156	0.0335172	0.0885249	0.82254	0.840989	0.845245	0.726039	0.758359	0.758801
cg11942059	COL9A1	NM_001851	TSS1500		6	71070874	R	9.15008e-05	0.0284311	0.0885216	0.763399	0.741034	0.759748	0.673007	0.673873	0.651736
cg14304702	YAP1	NM_001130145	Body		11	101507415	F	9.13088e-05	0.0284311	0.0885171	0.78533	0.802623	0.816624	0.712169	0.706042	0.720815
cg01800445	PRDM16	NM_022114	Body		1	3118975	F	0.000166099	0.0307475	0.0885073	0.839015	0.832898	0.86084	0.768867	0.742091	0.756274
cg26186392	RIMS2	NM_001100117	Body		8	104674711	F	0.00110056	0.0496287	0.0884941	0.851947	0.816826	0.871978	0.746468	0.761426	0.767375
cg19523250					11	114966777	F	0.0011049	0.0496896	0.0884786	0.81406	0.869632	0.83298	0.744894	0.761862	0.74448
cg14645027	KRT7	NM_005556	3'UTR	N_Shore	12	50928973	R	0.000481678	0.0379228	0.0884785	0.786916	0.829518	0.830137	0.729774	0.728704	0.722658
cg10423328	SATL1	NM_001012980	TSS200		X	84250787	F	0.00108857	0.0494387	0.0884584	0.852312	0.84608	0.838933	0.784331	0.761082	0.726537
cg12442108	KRT80	NM_001081492	3'UTR		12	50851177	F	3.95546e-05	0.0269557	0.0884581	0.84852	0.869135	0.85716	0.770756	0.778918	0.759767
cg19965300				N_Shelf	5	113416785	F	0.000231033	0.0327478	0.0884419	0.688391	0.705742	0.685638	0.625068	0.60018	0.589197
cg09108073	CDH11	NM_001797	5'UTR		16	63635279	F	9.63967e-05	0.0284616	0.0884116	0.724307	0.756181	0.746938	0.658135	0.657148	0.646908
cg21605772					5	160549608	F	0.000471786	0.0376718	0.0884023	0.745663	0.794409	0.763374	0.675839	0.683038	0.679362
cg17434901					11	133419078	R	5.85424e-05	0.0269557	0.0883747	0.815176	0.840035	0.829014	0.72906	0.74649	0.743553
cg24632873					3	50536372	R	0.000765972	0.0438831	0.0883487	0.758673	0.774971	0.763283	0.706712	0.669256	0.655913
cg15246989	PLXDC1	NM_020405	Body		17	34497999	F	0.000608197	0.0405974	0.0883368	0.817851	0.8385	0.84147	0.717814	0.756181	0.758815
cg08229518	MAEA	NM_005882	Body	Island	4	1310300	F	0.000152842	0.0304783	0.0882811	0.744495	0.769994	0.778245	0.671846	0.670536	0.685509
cg16462075					7	100382156	F	6.34436e-05	0.0269557	0.0882787	0.795146	0.809595	0.81122	0.730472	0.716456	0.704197
cg08493581	TCF7L1	NM_031283	Body		2	85325790	F	4.51095e-05	0.0269557	0.0882772	0.816248	0.815803	0.822648	0.713965	0.735571	0.740332
cg06943561	SCGBL	NM_001025591	TSS200		19	39777397	R	0.000855127	0.0453623	0.0882378	0.731515	0.720478	0.72321	0.667876	0.614763	0.62785
cg09386054					14	97989651	R	0.00022412	0.0326109	0.088234	0.637787	0.660884	0.643738	0.5391	0.569639	0.568967
cg16697433					11	133903683	F	0.000588251	0.0401802	0.0882025	0.823616	0.848685	0.811187	0.719249	0.751749	0.747882
cg24385652					10	49999834	R	5.14608e-05	0.0269557	0.0881824	0.78431	0.764044	0.760277	0.683151	0.687979	0.672954
cg10045909	ZNF668	NM_024706	5'UTR	S_Shore	16	30983343	R	0.000383387	0.0360283	0.0881716	0.478648	0.493738	0.499306	0.425532	0.383796	0.397848
cg19525872	RIMBP2	NM_015347	Body	N_Shore	12	129500761	R	0.000246591	0.0328478	0.088158	0.760517	0.787456	0.750055	0.684656	0.682144	0.666754
cg01556799	EPHA6	NM_001080448	Body		3	98327569	F	0.000452047	0.0374074	0.0881405	0.778518	0.79605	0.791902	0.727003	0.685848	0.689197
cg17903229	KRTAP10-1	NM_198691	3'UTR		21	44783570	F	0.00038732	0.0360479	0.088134	0.689514	0.705018	0.727841	0.605227	0.633185	0.619558
cg00795825	KRTAP17-1	NM_031964	TSS200		17	36725640	R	0.000325836	0.0345722	0.0881337	0.715522	0.730733	0.733582	0.65817	0.640513	0.616752
cg10578996	LOC148145	NR_027318	TSS200		19	34147713	F	0.000511267	0.0385918	0.0881257	0.783806	0.776889	0.808547	0.715663	0.679968	0.709234
cg19052164				N_Shelf	5	133900	R	0.000329079	0.0346341	0.0881216	0.77779	0.778131	0.801596	0.682566	0.692258	0.718328
cg08778805	FAT3	NM_001008781	Body		11	92212365	R	1.67142e-05	0.0269557	0.0881092	0.865915	0.885104	0.874591	0.793013	0.785961	0.782309
cg13064679	TNXB	NM_019105	Body	S_Shelf	6	32157931	R	1.94077e-05	0.0269557	0.0880943	0.839792	0.859214	0.858444	0.764493	0.760825	0.76785
cg08344485	PKNOX2	NM_022062	5'UTR		11	124717852	R	4.53637e-05	0.0269557	0.0880897	0.752822	0.769844	0.74729	0.676673	0.659616	0.669397
cg11886884				N_Shelf	3	139545550	F	0.000123744	0.0292042	0.0880865	0.785204	0.814275	0.800477	0.723899	0.701166	0.710631
cg10959950	LIFR	NM_001127671	5'UTR		5	38571331	R	0.000250949	0.0329532	0.0880813	0.713823	0.718471	0.733711	0.652327	0.614395	0.635038
cg09475041	F9	NM_000133	TSS200		X	138440402	R	0.000573378	0.0398952	0.0880642	0.677741	0.719936	0.71463	0.603093	0.626546	0.618475
cg03527274	PRDM16	NM_022114	Body	N_Shore	1	3137303	R	0.000316876	0.0343508	0.0880384	0.786475	0.822804	0.819911	0.732356	0.7113	0.721418
cg08898349	TRUB1	NM_139169	TSS1500	N_Shore	10	116687060	F	0.000958969	0.0472425	0.0880084	0.730837	0.753892	0.762552	0.688359	0.65017	0.644726
cg06120359					8	127174905	F	5.60241e-05	0.0269557	0.0879913	0.811152	0.838922	0.824402	0.743842	0.73544	0.73122
cg01171670					11	70760956	F	0.000252531	0.032974	0.0879802	0.705798	0.743228	0.743054	0.641636	0.645039	0.641465
cg19628739				N_Shelf	22	42648850	R	0.000648865	0.0413536	0.0879514	0.520515	0.569944	0.554949	0.468431	0.452641	0.460483
cg00664093				N_Shore	8	142982228	R	5.76327e-05	0.0269557	0.0879314	0.81059	0.83975	0.826263	0.732413	0.742169	0.738227
cg26649851					7	41577908	F	1.57074e-05	0.0269557	0.0879277	0.850303	0.841793	0.845378	0.753759	0.750724	0.769208
cg08104310	ASTN1	NM_004319	3'UTR		1	175097783	F	0.000328675	0.0346248	0.087913	0.717753	0.700661	0.735144	0.645491	0.615347	0.628981
cg02240748				S_Shore	16	997797	R	0.000161355	0.0307112	0.0878939	0.703604	0.719558	0.728092	0.614881	0.627663	0.645028
cg13020518				N_Shelf	22	47961838	F	0.00023647	0.0327587	0.0878875	0.733364	0.735773	0.703384	0.626631	0.633439	0.648787
cg10919344	OR5A1	NM_001004728	TSS200		11	58967210	F	0.00102742	0.0483911	0.0878771	0.812946	0.855071	0.844885	0.727495	0.762084	0.759691
cg00458317	KRTAP24-1	NM_001085455	TSS200		21	30577286	R	0.000545389	0.0392674	0.087875	0.755535	0.78675	0.768406	0.700512	0.685904	0.660651
cg13252730					14	22045326	F	0.000874906	0.0456332	0.0878694	0.894429	0.889108	0.846012	0.793161	0.79527	0.777509
cg09984096	MTMR7	NM_004686	Body		8	17239815	R	0.000516605	0.0387228	0.0878587	0.854533	0.846632	0.834863	0.78145	0.755928	0.735074
cg10355965					14	95420361	R	0.000225829	0.0326889	0.0878491	0.718215	0.727157	0.752525	0.631984	0.648909	0.653457
cg06621080	NAV1	NM_020443	Body		1	199897789	F	0.000172414	0.030852	0.0878189	0.813846	0.807005	0.819524	0.746082	0.708978	0.721857
cg09766556	SGCZ	NM_139167	TSS1500	S_Shore	8	15141250	R	0.000634854	0.0410744	0.0878086	0.819877	0.834689	0.833142	0.717008	0.740146	0.767128
cg20569804	ANO4	NM_178826	Body		12	99905451	F	0.000230693	0.0327478	0.0878073	0.800845	0.803802	0.823182	0.741328	0.709195	0.713885
cg03792964					3	73918851	F	2.41596e-05	0.0269557	0.087804	0.81077	0.800049	0.787126	0.714995	0.710352	0.709187
cg25391023	BTNL2	NM_019602	Body		6	32482732	R	0.000235329	0.0327587	0.0877932	0.855993	0.879476	0.890115	0.78053	0.801422	0.780253
cg06818217	RMST	NR_024037	Body		12	96411793	R	0.000870294	0.0455418	0.0877761	0.771484	0.816697	0.772392	0.711042	0.69759	0.688614
cg25379762	GAS7	NM_201433	Body	N_Shelf	17	10039090	F	1.90124e-05	0.0269557	0.0877638	0.851247	0.856946	0.842261	0.772315	0.756288	0.75856
cg07955064					16	17514174	F	0.00110679	0.0496896	0.0877567	0.670143	0.699987	0.718249	0.606177	0.626434	0.592499
cg21580421	CCDC80	NM_199512	TSS1500		3	113843924	R	0.00102893	0.0484185	0.0877524	0.819981	0.831611	0.824952	0.768998	0.712751	0.731538
cg03507641	ERC1	NM_178039	Body		12	1468504	R	0.000537109	0.0390885	0.0877396	0.295577	0.304281	0.31453	0.206363	0.200713	0.244093
cg06538709				S_Shelf	8	48816564	F	0.000601537	0.0404618	0.0877368	0.810388	0.848488	0.818077	0.718905	0.748618	0.74622
cg17891505					8	77480694	F	6.31558e-05	0.0269557	0.0877215	0.819614	0.813126	0.811075	0.744131	0.716431	0.720088
cg07454595					4	23170360	R	9.06428e-05	0.0284311	0.0877153	0.83551	0.849996	0.84852	0.764033	0.767269	0.739578
cg08549011	FSTL4	NM_015082	Body		5	132611028	F	2.66778e-05	0.0269557	0.0877127	0.910527	0.889842	0.897796	0.819616	0.808916	0.806496
cg19791143	LOC286135	NR_024473	TSS200		8	29898390	F	6.4565e-06	0.0269557	0.087704	0.868998	0.867308	0.860534	0.777735	0.771635	0.784358
cg18448977					2	147524337	F	0.000278108	0.0334824	0.0876389	0.818024	0.847892	0.834868	0.737456	0.764566	0.735844
cg06457534					11	91176127	F	0.000871873	0.0455668	0.0876267	0.752835	0.80379	0.775291	0.703368	0.682251	0.683417
cg24848870	NAV2	NM_182964	Body		11	19792585	F	3.65601e-06	0.0269557	0.0876265	0.856134	0.857538	0.863827	0.769203	0.776232	0.769184
cg10301767					12	57407910	R	0.00109922	0.049624	0.0876187	0.827993	0.808974	0.828741	0.746518	0.702912	0.753423
cg15209604					7	45984956	F	0.000193572	0.0315975	0.0876154	0.704468	0.733167	0.707303	0.613116	0.637714	0.631263
cg27643182	SNORD115-29	NR_003344	TSS1500		15	22985382	R	5.32799e-05	0.0269557	0.087599	0.807978	0.803844	0.826535	0.734605	0.716865	0.724089
cg07339864					7	70199061	F	0.00058135	0.0400335	0.0875979	0.816532	0.823419	0.797813	0.742966	0.731756	0.700248
cg23539633					11	115733519	F	0.000558821	0.0395885	0.0875481	0.758043	0.777956	0.7941	0.707926	0.687733	0.671796
cg00709775	ATP2B2	NM_001683	3'UTR	N_Shore	3	10344677	R	0.000459933	0.0374382	0.0875445	0.801311	0.810938	0.829334	0.704994	0.729383	0.744573
cg05555951	OR8H2	NM_001005200	TSS200		11	55629054	F	0.000238658	0.0327587	0.0875389	0.798304	0.820019	0.827199	0.736343	0.73627	0.710293
cg23238677	LRP2	NM_004525	Body		2	169865580	F	8.44434e-05	0.0278128	0.0875384	0.797418	0.82136	0.79144	0.71177	0.722199	0.713632
cg27281191					2	225911156	F	9.95696e-05	0.0287729	0.0875369	0.430822	0.420515	0.4438	0.358683	0.340135	0.333709
cg00676833				N_Shore	10	134580248	R	0.000804438	0.0445228	0.0875329	0.740448	0.749933	0.70847	0.633881	0.665063	0.637308
cg22421579	CCDC149	NM_001130726	Body		4	24494489	R	9.56801e-05	0.0284616	0.0875312	0.807212	0.805594	0.808442	0.712712	0.7068	0.739143
cg11506843	FAM90A20	NM_001164453	Body		8	7141343	R	0.000904319	0.0461347	0.0874829	0.704798	0.723317	0.758758	0.645157	0.646008	0.633259
cg01153385					12	114359309	R	0.000226673	0.0327132	0.0874811	0.826389	0.836026	0.807315	0.749667	0.737894	0.719725
cg26643914					5	172895641	F	0.000366325	0.035653	0.0874722	0.758849	0.767233	0.802237	0.687936	0.69272	0.685246
cg25195987	ADCYAP1R1	NM_001118	Body		7	31092450	R	0.000195349	0.0316629	0.087457	0.832198	0.828815	0.811681	0.756187	0.724072	0.730063
cg24815507	DNAJB6	NM_058246	Body	N_Shelf	7	156891243	F	0.000228558	0.0327462	0.08745	0.901429	0.879927	0.903605	0.823673	0.790767	0.808171
cg07668671	RPH3A	NM_001143854	Body		12	111790139	F	2.80146e-06	0.0269557	0.087428	0.859682	0.851737	0.856174	0.766964	0.76707	0.771274
cg26449294	DLG2	NM_001142699	3'UTR		11	82846841	R	0.000409152	0.0363838	0.0874188	0.840757	0.85358	0.83531	0.770271	0.76658	0.730538
cg20964856	HNRNPUL1	NM_144732	TSS1500	N_Shore	19	46459509	R	2.27972e-05	0.0269557	0.087415	0.566868	0.568112	0.564963	0.492808	0.471056	0.473832
cg07985589	OPCML	NM_001012393	Body	N_Shore	11	132735204	F	0.000379706	0.035933	0.0874089	0.836275	0.842368	0.829209	0.733026	0.738198	0.774401
cg11754382					2	223609706	R	0.000787721	0.0442941	0.0874001	0.855753	0.840308	0.864519	0.770687	0.788117	0.739576
cg14151372					10	108035547	F	2.35063e-05	0.0269557	0.0873762	0.778804	0.766484	0.765543	0.693869	0.677299	0.677534
cg23962746					1	207172511	R	0.000185139	0.0313812	0.0873648	0.837379	0.872657	0.866719	0.779303	0.767808	0.767551
cg12080566	FAM176A	NM_032181	TSS1500		2	75651740	F	6.49543e-05	0.0269557	0.0873581	0.804279	0.823115	0.834211	0.738064	0.730663	0.730803
cg02530656				S_Shelf	13	111122768	R	6.39025e-05	0.0269557	0.0873484	0.739206	0.769555	0.756219	0.671843	0.665049	0.666042
cg02703190	FAM172A	NR_028080	Body		5	93163232	F	0.000701447	0.0423958	0.0873477	0.78119	0.764706	0.790522	0.718175	0.68143	0.67477
cg15692052	HTR2A	NM_001165947	TSS1500		13	46370251	R	0.000327303	0.0346243	0.0873234	0.719368	0.758068	0.754238	0.652133	0.665603	0.651969
cg22284860	ODZ4	NM_001098816	Body		11	78338689	R	0.000781707	0.0442104	0.0873185	0.849699	0.86471	0.825554	0.776543	0.762503	0.738961
cg14472291	IQUB	NM_178827	Body		7	122929001	R	0.000330594	0.034671	0.0873042	0.870021	0.839184	0.857904	0.787561	0.759901	0.757734
cg01583716					16	7795519	R	0.000723943	0.042892	0.0872987	0.428942	0.386666	0.396852	0.332119	0.301182	0.317261
cg13724550	FGF1	NM_000800	5'UTR		5	141981217	R	0.000430193	0.0369637	0.0872803	0.864948	0.904781	0.889687	0.786919	0.813256	0.797399
cg25214187				S_Shelf	11	133791182	R	5.57978e-05	0.0269557	0.087256	0.763972	0.757545	0.736909	0.659962	0.666113	0.670582
cg13619074	DMRT1	NM_021951	Body		9	847563	F	0.000644385	0.041222	0.087253	0.611177	0.656156	0.65206	0.543047	0.555348	0.559239
cg04147593	SLC16A3	NM_004207	Body	S_Shore	17	77790008	R	0.000337909	0.0348361	0.0872511	0.652912	0.639305	0.626147	0.555369	0.568938	0.532304
cg19570406	ZFP92	NM_001136273	Body	N_Shore	X	152338105	F	4.4483e-05	0.0269557	0.0872492	0.756754	0.775867	0.757537	0.666554	0.67671	0.685145
cg18638434	C14orf45	NM_025057	Body	S_Shore	14	73556404	F	0.000288649	0.0337087	0.0872448	0.781798	0.769002	0.786636	0.70416	0.668694	0.702848
cg16231923	NPTN	NM_012428	Body	N_Shore	15	71710687	R	0.00109339	0.0494988	0.0872444	0.290778	0.330678	0.322752	0.23427	0.204487	0.243716
cg16636682				S_Shelf	16	33688866	F	0.000242435	0.0327987	0.0872215	0.672177	0.711452	0.702535	0.60221	0.611894	0.610396
cg19582822	KLK2	NM_001002231	TSS1500		19	56067787	F	0.000549417	0.0394088	0.0871985	0.801011	0.824346	0.840109	0.722988	0.727996	0.752888
cg01899318	ZNF19	NM_006961	TSS200		16	70080896	F	2.84026e-05	0.0269557	0.0871893	0.840968	0.862572	0.844482	0.767499	0.757402	0.761554
cg12405371					10	64494709	F	5.92492e-05	0.0269557	0.0871847	0.637604	0.661138	0.662454	0.573217	0.560798	0.565627
cg08723064				S_Shelf	X	68677762	R	3.30311e-05	0.0269557	0.0871818	0.83616	0.824235	0.826066	0.741619	0.753162	0.730135
cg01352551	SLC24A3	NM_020689	TSS1500	N_Shore	20	19139994	R	0.00101401	0.0481457	0.0871446	0.833571	0.83632	0.860992	0.77441	0.728371	0.766669
cg07051786					15	18747076	R	0.00107874	0.0492909	0.0871374	0.59416	0.631131	0.644182	0.522546	0.535782	0.549733
cg13607323					5	124554238	F	0.000164799	0.0307314	0.087126	0.791257	0.794401	0.774186	0.713004	0.703843	0.681619
cg05383332					14	73874173	F	0.000166397	0.0307475	0.0871163	0.799829	0.822542	0.801349	0.732974	0.725081	0.704316
cg11228785	ADAMTS2	NM_021599	Body		5	178545129	F	0.000253495	0.032974	0.0871133	0.778371	0.803151	0.789943	0.708918	0.683814	0.717395
cg05591126					17	42672261	R	0.000944182	0.0468564	0.0870981	0.843303	0.899862	0.867017	0.781168	0.783163	0.784556
cg26189021	KCNC4	NM_001039574	Body	S_Shelf	1	110559293	F	0.000230056	0.0327478	0.0870881	0.844161	0.875176	0.870063	0.767622	0.769795	0.790719
cg12279076					6	68652146	F	7.21577e-05	0.0269557	0.0870776	0.794426	0.795518	0.800541	0.707847	0.72633	0.695076
cg17670263	MIR520C	NR_030198	TSS1500		19	58902045	F	0.000277324	0.0334629	0.0870636	0.733692	0.757608	0.731572	0.660472	0.665935	0.635274
cg10542519	PLP2	NM_002668	Body	S_Shore	X	48916328	R	0.000169969	0.0308336	0.0870307	0.615751	0.639843	0.603349	0.534323	0.525719	0.53781
cg03011928	CDH13	NM_001257	Body		16	81580741	F	9.76574e-05	0.0285919	0.0870274	0.683896	0.711719	0.702087	0.608854	0.604451	0.623314
cg13256912	HRH1	NM_001098213	5'UTR		3	11186081	R	0.000476209	0.037782	0.0870268	0.752435	0.786253	0.788708	0.676538	0.703781	0.685998
cg20959403	ANO4	NM_178826	5'UTR		12	99804615	R	0.00011874	0.0291527	0.0870184	0.627974	0.635798	0.628076	0.563658	0.531764	0.53537
cg01364826	LEMD1	NM_001001552	TSS1500		1	203658823	R	0.000964525	0.0473497	0.0870098	0.796415	0.84038	0.819839	0.714163	0.730913	0.750528
cg25395619	TRPC7	NM_001167576	Body	S_Shore	5	135721010	F	1.70243e-05	0.0269557	0.087006	0.875413	0.883962	0.867583	0.786327	0.79665	0.782963
cg23228178	PADI4	NM_012387	TSS1500		1	17506268	F	0.000396179	0.0361387	0.0869939	0.821322	0.805327	0.824905	0.706159	0.738486	0.745927
cg15803972	MYO3B	NM_001083615	Body		2	171027302	R	4.04064e-05	0.0269557	0.0869927	0.754936	0.765238	0.779891	0.682352	0.683803	0.672931
cg12364136	PTPRN2	NM_002847	Body		7	158023978	R	9.55935e-05	0.0284616	0.0869905	0.841159	0.860841	0.831821	0.758573	0.748561	0.765716
cg08214029	CCL18	NM_002988	TSS200		17	31415591	R	2.30878e-05	0.0269557	0.0869842	0.786379	0.779937	0.779221	0.707811	0.688067	0.688706
cg07431973	FRMD6	NM_152330	5'UTR		14	51212133	F	0.000863336	0.0454483	0.0869674	0.839631	0.831133	0.841842	0.754937	0.775405	0.72136
cg14754713					3	50553361	F	5.55816e-06	0.0269557	0.086967	0.871422	0.880862	0.877094	0.794278	0.783823	0.790376
cg00455467				N_Shore	2	131309632	R	0.000273317	0.0334297	0.0869648	0.738399	0.735212	0.736714	0.674833	0.637085	0.637511
cg27200236					4	23905552	F	6.71608e-05	0.0269557	0.0869427	0.805665	0.819314	0.80124	0.712158	0.717168	0.736064
cg22293823					11	115811584	R	0.000899146	0.046032	0.0869365	0.801423	0.82467	0.813735	0.751945	0.700788	0.726285
cg25303831	C13orf26	NM_152325	Body		13	30442911	R	1.71896e-05	0.0269557	0.0869024	0.796512	0.816823	0.807782	0.71573	0.722641	0.72204
cg06372654	IMPDH1	NM_001142576	Body	N_Shore	7	127831891	R	0.000688035	0.0420983	0.0868935	0.73595	0.717332	0.742131	0.671402	0.628482	0.634849
cg16381917	PLBD2	NM_001159727	Body	S_Shore	12	112282103	R	0.000202895	0.0320018	0.0868808	0.851536	0.843885	0.873959	0.755209	0.780473	0.773056
cg24547910					4	100851974	F	5.264e-06	0.0269557	0.0868369	0.782749	0.795788	0.788064	0.699696	0.702589	0.703805
cg18638118					7	154885987	F	0.000323077	0.0344885	0.0868326	0.808755	0.807137	0.805712	0.745842	0.711787	0.703476
cg10476085	FGF1	NM_033136	5'UTR		5	142045921	R	5.34946e-06	0.0269557	0.0868115	0.660614	0.666891	0.670555	0.579431	0.583875	0.57432
cg08371140					10	36778511	R	0.000471017	0.0376625	0.0867973	0.657986	0.701656	0.662183	0.591659	0.584806	0.584968
cg04926384	BMP5	NM_021073	Body		6	55824203	F	0.000693088	0.0422032	0.0867871	0.803596	0.846064	0.811864	0.721583	0.749061	0.730519
cg00732232				Island	8	1253139	R	7.93488e-06	0.0269557	0.0867382	0.804552	0.806789	0.804104	0.726928	0.717577	0.710725
cg06719334	A2BP1	NM_001142334	Body		16	7441309	F	1.08867e-05	0.0269557	0.0867242	0.854368	0.848218	0.858563	0.775899	0.762229	0.762849
cg13436968	VSTM2A	NM_182546	Body		7	54590467	R	0.000696689	0.042296	0.0867188	0.765732	0.757184	0.761034	0.687076	0.692203	0.644514
cg11851382	PPAP2B	NM_177414	Body		1	56769498	R	0.000439861	0.0371662	0.0867026	0.856044	0.895152	0.882062	0.805928	0.779788	0.787435
cg08856242	SMYD2	NM_020197	Body		1	212573203	R	0.000535105	0.0390697	0.0866996	0.876581	0.862031	0.878602	0.793659	0.759397	0.804059
cg21871338					14	86332610	R	0.000106246	0.0291071	0.0866937	0.703018	0.709574	0.711646	0.635505	0.625992	0.60266
cg05465572	FRK	NM_002031	Body		6	116466877	R	0.000289296	0.033725	0.0866771	0.823139	0.803558	0.835924	0.719335	0.734631	0.748623
cg07598464	OR2M3	NM_001004689	1stExon		1	246433506	R	0.000423958	0.0368308	0.0866163	0.832258	0.791927	0.81234	0.73127	0.71107	0.734337
cg26748898	MGAT5B	NM_144677	Body		17	72423922	R	0.000393554	0.0361162	0.0865843	0.815022	0.851214	0.824276	0.737753	0.759502	0.733505
cg02560364					16	61777210	F	0.000284687	0.0336163	0.0865806	0.753475	0.76742	0.73092	0.675855	0.663721	0.652498
cg23894862	CATSPERG	NM_021185	TSS1500	N_Shore	19	43517944	F	0.000192525	0.0315943	0.086571	0.43933	0.462674	0.445793	0.349932	0.380583	0.357568
cg02932321	DEFA6	NM_001926	1stExon		8	6770931	R	0.000517813	0.0387331	0.086559	0.641499	0.648972	0.646835	0.567305	0.531651	0.578672
cg23784413	EPPK1	NM_031308	1stExon	N_Shore	8	145013789	F	0.000137694	0.0297555	0.0865338	0.797065	0.812406	0.829639	0.722278	0.7206	0.736631
cg01904145	PROK2	NM_021935	Body	N_Shelf	3	71913991	R	0.000902302	0.0461042	0.0865313	0.850425	0.880603	0.89316	0.776989	0.779455	0.80815
cg00321288	MGAT4C	NM_013244	TSS200		12	85756823	F	0.000661586	0.0416117	0.0865268	0.548718	0.591686	0.563366	0.490902	0.488469	0.464818
cg23338195	SLC30A8	NM_173851	TSS1500		8	118215599	R	0.000239908	0.032789	0.0865011	0.783169	0.799546	0.806281	0.690115	0.716985	0.722393
cg25021884	AGBL1	NM_152336	TSS1500		15	84485067	F	7.69501e-05	0.0275127	0.0864851	0.764855	0.789259	0.781752	0.703901	0.68715	0.685359
cg11580026				S_Shelf	3	44705248	F	0.000353332	0.035355	0.0864685	0.728962	0.753252	0.728263	0.670022	0.635163	0.645888
cg01857748	SLC25A21	NM_030631	Body		14	36365545	R	0.000353375	0.035355	0.0864617	0.783282	0.816909	0.793976	0.711432	0.726708	0.696642
cg00085438	MBNL1	NM_207295	Body		3	153532670	F	7.43555e-05	0.0271542	0.086439	0.673748	0.701738	0.689517	0.607689	0.604837	0.593159
cg19241878	C17orf73	NR_024626	TSS1500		17	46201188	R	6.67963e-05	0.0269557	0.0863836	0.870745	0.872773	0.867521	0.779244	0.801121	0.771524
cg20043679	LOC388965	NR_003663	TSS1500	N_Shore	2	84370832	F	0.000500288	0.0382725	0.0863561	0.818222	0.821936	0.828195	0.763889	0.726352	0.719044
cg19946638	SHANK2	NM_012309	5'UTR		11	70537295	F	0.000301633	0.0339438	0.0863553	0.747842	0.761698	0.776276	0.676809	0.658189	0.691752
cg24636944					5	92641052	R	0.000819992	0.0448139	0.0863498	0.792617	0.808234	0.843407	0.723607	0.723489	0.738113
cg24874998					3	164504072	F	0.000234293	0.0327587	0.0863468	0.736329	0.744073	0.715429	0.643286	0.661248	0.632256
cg16546376	RAB27B	NM_004163	Body		18	50701261	F	0.00071381	0.0426454	0.0863304	0.892424	0.847385	0.8893	0.794259	0.780313	0.795545
cg16780562				S_Shore	14	101103004	F	2.62779e-05	0.0269557	0.0863277	0.855279	0.871007	0.860942	0.781151	0.781662	0.765433
cg15903395	C2orf51	NM_152670	TSS200		2	88605268	R	0.000382186	0.0359782	0.0863211	0.81874	0.840186	0.855362	0.740464	0.747295	0.767566
cg24337273				S_Shelf	6	1464162	F	0.000707441	0.0424994	0.0862987	0.824433	0.851809	0.828676	0.754251	0.767337	0.724433
cg14506195				N_Shelf	4	189150925	R	0.000310321	0.0342577	0.0862859	0.786638	0.822228	0.812974	0.729637	0.726319	0.707027
cg00327332	CSTT	NR_001279	TSS1500		20	23446993	F	1.1212e-05	0.0269557	0.0862775	0.765053	0.777585	0.760441	0.683105	0.68298	0.678162
cg26615853	KCNMA1	NM_001161353	Body		10	79017110	R	0.000470389	0.0376625	0.0862756	0.893813	0.875567	0.89327	0.786431	0.790972	0.826421
cg10092198	OR56B4	NM_001005181	1stExon		11	6086124	R	0.000225139	0.0326487	0.0862277	0.732149	0.749783	0.74073	0.637732	0.674612	0.651635
cg26159090	BICC1	NM_001080512	Body		10	60144258	F	0.000209975	0.032302	0.0861973	0.826268	0.860911	0.861697	0.761819	0.764408	0.764056
cg01679108	SALL1	NM_002968	Body		16	49731570	F	0.000358219	0.035481	0.0861831	0.575473	0.611525	0.615403	0.517938	0.507742	0.518172
cg08594681	CLU	NM_203339	1stExon	N_Shelf	8	27524601	F	0.000176852	0.0310789	0.0861753	0.433563	0.436635	0.416264	0.357348	0.325403	0.345185
cg05852824					15	24094910	R	0.000798917	0.0444846	0.0861533	0.709332	0.748805	0.748027	0.644477	0.666074	0.637154
cg14794480					17	14307810	R	6.63461e-05	0.0269557	0.0861243	0.854089	0.843248	0.871369	0.768387	0.777018	0.764928
cg16531955	FRS2	NM_001042555	Body		12	68251521	R	0.000667849	0.0417447	0.0861126	0.830131	0.839546	0.82879	0.767874	0.75373	0.718526
cg08498533				Island	10	134588559	F	7.95215e-05	0.0276313	0.0861069	0.804631	0.819187	0.807975	0.708037	0.731865	0.733569
cg20752233	SRP14	NM_003134	Body	N_Shore	15	38117400	R	0.000454677	0.0374074	0.0860947	0.73213	0.779072	0.751236	0.672963	0.666272	0.664919
cg01104277					1	206044219	R	0.00032722	0.0346243	0.0860914	0.796799	0.819915	0.83998	0.726684	0.733905	0.73783
cg25388861					4	139864278	R	0.00111351	0.0497722	0.0860699	0.781799	0.778557	0.765545	0.716755	0.68976	0.661177
cg19471040	GRM4	NM_000841	Body		6	34139120	R	0.000137159	0.0297555	0.0860599	0.70123	0.732378	0.701493	0.62339	0.630422	0.623109
cg07377936					10	133456416	R	0.000486304	0.0380395	0.0860566	0.81904	0.831466	0.808516	0.731836	0.755905	0.71311
cg03508052	MTUS1	NM_001001931	Body		8	17600635	R	0.000143261	0.0300823	0.0860448	0.820473	0.800247	0.79875	0.731617	0.725043	0.704675
cg03700302	CACNA2D4	NM_172364	Body		12	1818839	F	0.000108956	0.029118	0.0860361	0.851306	0.865304	0.882446	0.787963	0.772447	0.780538
cg18008487	ASB4	NM_016116	Body	Island	7	94995164	F	0.000835574	0.0451679	0.0860221	0.737905	0.757856	0.751817	0.682452	0.6726	0.63446
cg01293723	KRTAP1-5	NM_031957	1stExon		17	36436563	F	0.000425755	0.0368308	0.0860219	0.727599	0.717848	0.724199	0.623951	0.623753	0.663877
cg12394289	EHMT2	NM_006709	Body	N_Shore	6	31964685	F	1.24553e-05	0.0269557	0.0859442	0.539354	0.547971	0.549531	0.46033	0.467188	0.451505
cg23711059				S_Shore	20	59947128	R	0.00107092	0.0491639	0.0859427	0.707172	0.757822	0.733228	0.636582	0.641427	0.662385
cg26189283	RAG1AP1	NM_001122839	Body	S_Shore	1	153376002	F	0.000115388	0.0291527	0.0859345	0.609286	0.60522	0.628457	0.514561	0.538957	0.531641
cg19673176	HRNBP3	NM_001082575	5'UTR		17	74627653	F	9.76943e-06	0.0269557	0.0859278	0.79007	0.792242	0.795019	0.705096	0.698901	0.715551
cg16477662	SEMA5A	NM_003966	5'UTR		5	9535935	F	0.000256793	0.0330181	0.0859189	0.782478	0.816487	0.799949	0.706631	0.706337	0.728189
cg07037963	SLC22A7	NM_153320	TSS200		6	43373824	R	3.00336e-05	0.0269557	0.0858964	0.705581	0.715907	0.702448	0.610451	0.625342	0.630454
cg20426415	CYP2C18	NM_000772	Body		10	96436773	F	0.000337573	0.0348361	0.0858884	0.762131	0.762943	0.79695	0.689496	0.697756	0.677106
cg21460403	KCNQ3	NM_004519	Body		8	133403606	F	0.000443536	0.0372452	0.0858762	0.822524	0.819614	0.795768	0.736411	0.738695	0.705172
cg01455398	HRNBP3	NM_001082575	5'UTR		17	74712076	F	0.00110975	0.0497032	0.0858733	0.746802	0.792083	0.75664	0.660199	0.688688	0.689018
cg20187049					3	28957943	R	0.000237438	0.0327587	0.085872	0.827031	0.819418	0.815007	0.721422	0.724993	0.757425
cg04499646					6	133571394	R	0.000157774	0.030634	0.0858652	0.821312	0.858317	0.843489	0.756729	0.751315	0.757478
cg24058386	C1orf61	NM_006365	5'UTR	S_Shelf	1	154660541	R	0.000479171	0.0378341	0.0858581	0.253604	0.266692	0.227172	0.172426	0.169574	0.147892
cg22780193					13	73723253	R	0.000208563	0.0322463	0.0858216	0.791237	0.812168	0.826277	0.717759	0.735291	0.719167
cg19274606	C6orf223	NM_153246	TSS200	N_Shore	6	44076230	R	0.000749839	0.0435137	0.0858151	0.335563	0.347565	0.342663	0.284264	0.233173	0.250909
cg17087499	RYR2	NM_001035	Body		1	235773387	F	0.00065718	0.0415091	0.085801	0.557831	0.590693	0.568557	0.469636	0.508222	0.48182
cg15251319	C3orf21	NM_152531	Body		3	196317591	R	0.000509346	0.0385705	0.0857799	0.841323	0.869882	0.868798	0.763177	0.764048	0.795438
cg11661281	OR6Q1	NM_001005186	1stExon		11	57555439	R	0.000861213	0.045434	0.0857775	0.507308	0.558679	0.519795	0.436151	0.447145	0.445153
cg22864519	PMP2	NM_002677	TSS1500		8	82523291	R	0.000494574	0.0381067	0.085765	0.856757	0.817413	0.859921	0.765129	0.754322	0.757344
cg17407166					10	111176694	R	0.000127718	0.0292137	0.085751	0.769102	0.797895	0.782889	0.687743	0.695773	0.709118
cg16024523	TP73	NM_001126240	Body	S_Shelf	1	3599663	F	0.000280131	0.0334824	0.0857441	0.653217	0.638269	0.660141	0.567205	0.545369	0.581821
cg23281529	RASA3	NM_007368	Body		13	113841931	F	0.000245251	0.0328065	0.0857428	0.920831	0.936984	0.960519	0.858561	0.855641	0.846903
cg23415398					2	4561424	R	0.000647723	0.0413395	0.0857369	0.767344	0.805781	0.80256	0.697872	0.697714	0.722888
cg01718479	NTM	NM_001048209	1stExon		11	130745870	F	0.000824545	0.044846	0.0857226	0.755048	0.730582	0.747153	0.67853	0.631766	0.66532
cg09248276					1	158963092	F	0.000599422	0.0403941	0.0857221	0.418216	0.44336	0.459398	0.367712	0.357141	0.338955
cg10020787					10	50296844	R	3.23912e-05	0.0269557	0.0857173	0.835078	0.840641	0.843097	0.757984	0.740274	0.763406
cg05239967	TSG1	NR_015362	TSS1500		6	94473300	F	0.00108185	0.0493259	0.0857155	0.7852	0.83184	0.802477	0.739006	0.706832	0.716532
cg03979024	DIP2C	NM_014974	Body	N_Shelf	10	409189	R	0.000695501	0.0422825	0.0857094	0.737202	0.778316	0.747844	0.671133	0.682555	0.652545
cg07230786	RPH3A	NM_014954	3'UTR		12	111819415	R	3.11284e-05	0.0269557	0.0857017	0.827933	0.816085	0.80608	0.734826	0.734464	0.723703
cg24069188	SEC13	NM_001136232	TSS1500	S_Shore	3	10338881	F	5.78179e-05	0.0269557	0.0856797	0.837058	0.838395	0.851494	0.769571	0.755802	0.744535
cg20265403	TSHZ2	NM_173485	Body		20	51081495	F	0.000105856	0.0291071	0.0856693	0.77161	0.776868	0.773225	0.706626	0.673113	0.684958
cg07583933	PACSIN1	NM_020804	5'UTR		6	34594107	R	0.00106688	0.0491036	0.0856459	0.798014	0.780154	0.815234	0.687044	0.718282	0.731139
cg19300307	STK24	NM_003576	Body		13	97934581	R	0.000674274	0.0419026	0.0856455	0.854961	0.889533	0.895235	0.790267	0.782566	0.80996
cg21626493	LRCH2	NM_020871	TSS1500	S_Shore	X	114375847	R	4.19804e-05	0.0269557	0.0856379	0.864424	0.884797	0.888268	0.796871	0.795426	0.788278
cg07977620	OR5M1	NM_001004740	1stExon		11	56137190	F	0.000213894	0.0323527	0.0856294	0.829148	0.844577	0.824201	0.746374	0.764502	0.730162
cg25119261	HLA-DPB2	NR_001435	Body	N_Shelf	6	33189329	R	0.00032341	0.0344885	0.0856118	0.83519	0.852181	0.822142	0.74876	0.735848	0.768069
cg07364729					13	111834613	R	0.000466941	0.037571	0.0856092	0.836545	0.855725	0.856061	0.771109	0.739938	0.780455
cg17701146	PTPRN2	NM_002847	Body	S_Shore	7	157080122	R	1.936e-05	0.0269557	0.0855998	0.834456	0.845819	0.833585	0.761919	0.749894	0.745248
cg15819471	RFX4	NM_032491	Body		12	105661472	R	0.00112336	0.049962	0.0855973	0.733424	0.69109	0.734605	0.637445	0.647154	0.617727
cg08937774					7	42963585	R	0.000859135	0.045434	0.0855953	0.880376	0.867537	0.871673	0.817655	0.767343	0.777802
cg08903181					12	87542363	F	0.000167535	0.0307777	0.0855675	0.780598	0.817744	0.796309	0.707865	0.715209	0.714874
cg02724909	CAMK2A	NM_015981	Body		5	149605297	F	0.00107597	0.0492411	0.0855497	0.862305	0.893133	0.888373	0.794718	0.772841	0.819604
cg17859258	KIF21A	NM_017641	Body		12	38086894	R	0.00043304	0.0369637	0.0855342	0.775577	0.785832	0.768871	0.716411	0.681191	0.676074
cg04913790				S_Shelf	6	34233152	R	0.000466569	0.037571	0.0855127	0.676666	0.685499	0.669068	0.58867	0.615358	0.570667
cg02361013	ZFPM1	NM_153813	Body	S_Shore	16	87082658	F	0.000535874	0.0390697	0.0855098	0.809318	0.854334	0.845381	0.748814	0.745702	0.757987
cg26501046	DIRC3	NR_026597	Body		2	218174552	R	0.000551219	0.0394202	0.0854902	0.725496	0.764271	0.762798	0.6555	0.662555	0.67804
cg15684231	PTPRN2	NM_002847	Body	S_Shore	7	157271392	R	0.000274657	0.0334418	0.0854854	0.829475	0.861418	0.833143	0.753129	0.769187	0.745265
cg04704683	POF1B	NM_024921	Body		X	84520964	R	0.000135443	0.0296487	0.0854661	0.761755	0.762337	0.742548	0.68604	0.658606	0.665596
cg12397274	TINAG	NM_014464	TSS1500		6	54280142	F	0.00036308	0.0355752	0.0854465	0.813043	0.824325	0.842812	0.74608	0.722455	0.755305
cg19436270	CSMD3	NM_198124	Body		8	113350351	R	0.000215197	0.0323527	0.0854369	0.75848	0.762528	0.762362	0.691612	0.653182	0.682267
cg13440894	BLK	NM_001715	TSS1500		8	11388544	R	3.01047e-06	0.0269557	0.085432	0.773169	0.767467	0.767781	0.685212	0.686321	0.680588
cg26216724				S_Shelf	5	1802217	F	0.000129054	0.0292137	0.0853608	0.57975	0.608743	0.602051	0.500735	0.514721	0.519005
cg14361001					9	83179018	F	0.000203196	0.0320111	0.0853165	0.837345	0.867127	0.867615	0.770941	0.782279	0.762917
cg03540894				N_Shelf	12	132121679	F	0.000133556	0.0294877	0.0852996	0.77479	0.805127	0.785078	0.699883	0.695616	0.713597
cg05255819					4	139616418	F	0.000241579	0.0327987	0.0852844	0.841544	0.863242	0.838612	0.771893	0.744421	0.77123
cg18006990	GTPBP2	NM_019096	Body	N_Shore	6	43702940	R	0.000396598	0.0361387	0.0852548	0.520856	0.56606	0.543086	0.460539	0.452988	0.460711
cg08320122					4	61773183	F	4.76761e-05	0.0269557	0.0852202	0.837164	0.832749	0.830912	0.755595	0.732626	0.756942
cg24312879	ACOT7	NM_181864	Body		1	6344705	R	0.000457603	0.0374074	0.085218	0.852765	0.864032	0.89264	0.792854	0.789959	0.77097
cg25624690					8	1068076	R	0.000284879	0.0336163	0.0851939	0.798925	0.836399	0.81942	0.72118	0.739036	0.738946
cg22070232	RNF144A	NM_014746	TSS1500	N_Shore	2	6973526	F	0.000399581	0.0361387	0.0851909	0.835095	0.862943	0.871238	0.772342	0.757574	0.783788
cg21672829	AGAP1	NM_014914	Body		2	236284564	F	9.6623e-05	0.0284616	0.085186	0.864351	0.884092	0.878395	0.793156	0.802121	0.776003
cg16234068					2	18408053	R	0.000762702	0.0438114	0.0851763	0.771915	0.822188	0.806002	0.709232	0.722177	0.713167
cg04472592	KRT80	NM_001081492	TSS200		12	50872053	R	0.000347772	0.0351585	0.0851404	0.777416	0.795184	0.796404	0.718552	0.682067	0.712964
cg17788013	SPINK5	NM_001127698	TSS1500		5	147423445	F	0.000644424	0.041222	0.0851316	0.854161	0.868929	0.899545	0.777624	0.790538	0.799078
cg25641145	ANKRD46	NM_198401	TSS1500	S_Shore	8	101641542	R	0.000776265	0.0441105	0.0851083	0.593273	0.634895	0.626443	0.519421	0.549011	0.530854
cg09868640	GABRG3	NM_033223	Body		15	25122481	F	1.17311e-05	0.0269557	0.0850864	0.794288	0.800472	0.788014	0.714033	0.701448	0.712033
cg21964058					8	12067564	F	0.000243617	0.0328065	0.0850758	0.848781	0.865298	0.881382	0.766791	0.78147	0.791972
cg18294332	MAP3K1	NM_005921	Body		5	56184031	F	0.000406399	0.0362783	0.0850689	0.496272	0.516833	0.525841	0.438632	0.437298	0.407809
cg06622994	ABCG4	NM_022169	3'UTR		11	118537794	R	0.000289485	0.0337303	0.0850627	0.78238	0.757433	0.799696	0.697248	0.69169	0.695383
cg16896868					13	109117563	F	0.000553569	0.0394659	0.0850486	0.827137	0.870117	0.833464	0.766209	0.759866	0.749498
cg15894389	HTR2A	NM_001165947	1stExon		13	46368858	R	0.000440156	0.0371662	0.0850386	0.781117	0.777487	0.75676	0.708989	0.672788	0.678472
cg05680111	TNXB	NM_019105	Body	S_Shore	6	32155100	R	0.000148348	0.0302264	0.0850354	0.828519	0.864693	0.845879	0.757658	0.764698	0.761628
cg22657682					5	155312245	F	0.00103921	0.0485791	0.085032	0.649394	0.663498	0.611793	0.559261	0.546229	0.564099
cg26712821	DVWA	NR_027927	Body	N_Shelf	3	15219702	R	0.00060165	0.0404618	0.0850065	0.628189	0.624288	0.619716	0.538071	0.514801	0.564302
cg27440592					11	125476994	R	0.00014401	0.0300948	0.0850012	0.855172	0.821543	0.834491	0.754948	0.757023	0.744232
cg11090409	KRT83	NM_002282	TSS1500	S_Shore	12	51002812	R	0.000238186	0.0327587	0.084984	0.798514	0.839379	0.817959	0.735019	0.733983	0.731898
cg15556380	DFFB	NM_004402	3'UTR		1	3791563	R	0.000535099	0.0390697	0.0849781	0.943164	0.954007	0.926472	0.871984	0.863234	0.833489
cg22176018					2	242516284	R	0.000726344	0.0429327	0.0849754	0.881107	0.902547	0.897887	0.784297	0.810952	0.831366
cg16150446					5	149865367	R	0.000467962	0.037571	0.0849603	0.736232	0.710599	0.746114	0.660116	0.64794	0.630008
cg00426668	CAPN6	NM_014289	TSS1500		X	110400887	F	4.61806e-05	0.0269557	0.0849524	0.788771	0.808209	0.78483	0.715612	0.707249	0.704093
cg16206344				S_Shore	6	166190357	R	0.000598264	0.0403941	0.0849459	0.811617	0.848065	0.843499	0.762686	0.752978	0.732679
cg01026796	DHX29	NM_019030	Body	N_Shore	5	54638300	R	3.67003e-06	0.0269557	0.0849196	0.80367	0.800352	0.806269	0.713736	0.72103	0.720766
cg20754034	TNXB	NM_019105	5'UTR	S_Shore	6	32174560	F	0.00015074	0.0304156	0.0849106	0.810637	0.775379	0.799069	0.712856	0.712267	0.705231
cg23944572	LARP1	NM_015315	Body		5	154081852	R	9.65071e-05	0.0284616	0.0848884	0.821239	0.853321	0.830565	0.752544	0.749007	0.748909
cg26360924					1	118594528	F	0.000983312	0.0476534	0.084879	0.616084	0.630275	0.605016	0.55799	0.530349	0.5084
cg20801711					8	55441533	R	0.000271652	0.0334099	0.0848574	0.778574	0.802558	0.764884	0.702835	0.686813	0.701797
cg02360676	SHC2	NM_012435	3'UTR	N_Shore	19	369205	R	2.67869e-05	0.0269557	0.0848344	0.708282	0.690445	0.694749	0.604405	0.617203	0.617365
cg10913077	ARHGEF3	NM_001128615	5'UTR		3	57055704	R	0.000252743	0.032974	0.0847947	0.779215	0.808779	0.786517	0.690801	0.713144	0.716182
cg05922911	OR9Q1	NM_001005212	5'UTR		11	57552009	R	0.000912765	0.0463037	0.0847837	0.807824	0.844291	0.828061	0.748426	0.758346	0.719052
cg26576047	PLXNA4	NM_020911	Body		7	131525018	R	0.000568575	0.0398012	0.0847728	0.819971	0.855339	0.831399	0.739533	0.770258	0.742601
cg05801329					4	190180645	R	0.000154207	0.0305139	0.084706	0.834666	0.826303	0.834326	0.739776	0.767443	0.733958
cg21908886	FAM78B	NM_001017961	3'UTR		1	164306068	F	0.000197404	0.0317884	0.0846756	0.717908	0.745849	0.709223	0.640564	0.643199	0.635192
cg27205798	TMTC1	NM_175861	Body		12	29565144	F	0.000146345	0.0301803	0.0846503	0.83743	0.847862	0.85208	0.742095	0.768453	0.772873
cg13973180	C17orf101	NM_175902	Body	N_Shore	17	77966418	F	0.000134657	0.0295344	0.0846414	0.840695	0.846344	0.871679	0.760406	0.770617	0.773771
cg14927712					2	140159489	F	3.20161e-05	0.0269557	0.084638	0.588848	0.60611	0.602923	0.522164	0.516307	0.505496
cg07988206				S_Shelf	12	129756277	R	0.00045535	0.0374074	0.0845884	0.605373	0.597023	0.561762	0.504243	0.49898	0.50717
cg00672277	ESYT3	NM_031913	Body	N_Shore	3	139652418	F	0.00054069	0.039176	0.0845874	0.732757	0.776278	0.74812	0.671887	0.675563	0.655942
cg08003789					3	14605426	R	0.000490302	0.0380602	0.0845832	0.618202	0.616459	0.655829	0.546239	0.536537	0.553964
cg01800297				S_Shelf	5	113422490	F	2.21337e-05	0.0269557	0.0845795	0.779905	0.783928	0.791157	0.694142	0.711523	0.695586
cg12892638					8	102321959	R	0.000290973	0.0337564	0.084579	0.79494	0.809825	0.806077	0.724235	0.735773	0.697097
cg21548152	C3orf62	NM_198562	3'UTR		3	49281819	F	5.18227e-06	0.0269557	0.084565	0.847567	0.841402	0.848369	0.762774	0.765257	0.755613
cg03669268	CST9L	NM_080610	1stExon		20	23497106	R	0.000108227	0.0291071	0.0845593	0.804965	0.78951	0.811565	0.732071	0.709282	0.711009
cg24730705				S_Shore	10	119486372	R	0.000147639	0.0302148	0.0845576	0.603665	0.628077	0.63441	0.527787	0.542338	0.542355
cg04039397	CD96	NM_198196	TSS200		3	112743473	F	0.000242698	0.0327987	0.0845502	0.841422	0.84009	0.848029	0.780004	0.740333	0.755553
cg01458336					2	19301061	R	9.08278e-06	0.0269557	0.0845491	0.82481	0.824841	0.83288	0.749287	0.735806	0.74379
cg09616721	GPR26	NM_153442	3'UTR		10	125443628	R	0.000454549	0.0374074	0.0845241	0.819648	0.832125	0.834402	0.723364	0.767383	0.741856
cg10166825					5	125080494	R	0.0010858	0.0494001	0.0844837	0.790327	0.808477	0.841314	0.715447	0.735634	0.735586
cg02753719					17	64169228	R	0.000178677	0.0311205	0.0844533	0.841539	0.825844	0.846455	0.761924	0.763221	0.735334
cg06781213					8	22997315	F	0.000281676	0.033548	0.0844423	0.795231	0.81453	0.829318	0.721565	0.721284	0.742903
cg05399607	AAA1	NR_015356	TSS1500		7	34841058	R	0.000159795	0.0306985	0.084425	0.763024	0.784022	0.75977	0.671229	0.697448	0.684863
cg26236655					2	199759679	R	0.000818735	0.0447819	0.0843939	0.847849	0.863464	0.841304	0.749925	0.794104	0.755407
cg10241675					13	30840320	F	0.000692499	0.0422032	0.0843768	0.802889	0.820335	0.793163	0.738563	0.696823	0.727871
cg00980804					2	150685687	F	0.000161232	0.0307112	0.0843746	0.756535	0.78508	0.783013	0.698683	0.692935	0.679886
cg00625743	TFDP3	NM_016521	TSS1500		X	132180805	R	0.000767897	0.043925	0.0843711	0.871633	0.882099	0.848503	0.805956	0.772143	0.771023
cg19887404	AGBL1	NM_152336	Body		15	84932412	F	0.000521555	0.0388412	0.0843626	0.809157	0.848498	0.837608	0.761302	0.735402	0.745472
cg01806590	ABHD4	NM_022060	TSS1500	N_Shore	14	22136261	F	0.000493031	0.0380853	0.0843556	0.864951	0.895484	0.867172	0.793467	0.807157	0.773917
cg14599380					4	16919778	R	2.62087e-05	0.0269557	0.0843526	0.773002	0.776042	0.793248	0.694027	0.701355	0.693853
cg07672688				S_Shore	16	78182913	F	6.94247e-05	0.0269557	0.0843398	0.853079	0.867207	0.86193	0.783412	0.784879	0.760905
cg04819337	HSF2BP	NM_007031	Body	N_Shelf	21	43806795	R	0.000284677	0.0336163	0.0843042	0.865152	0.881432	0.90172	0.789399	0.795995	0.809998
cg20928238				N_Shelf	14	70354678	R	0.000106862	0.0291071	0.0843028	0.706915	0.699274	0.725511	0.615791	0.636055	0.626945
cg01538165	NCOA2	NM_006540	5'UTR		8	71402682	R	0.000117123	0.0291527	0.0842958	0.867133	0.857904	0.848088	0.783865	0.779367	0.757005
cg22418337				S_Shelf	5	2168107	F	0.000254211	0.032974	0.0842956	0.829384	0.857713	0.826758	0.752568	0.742852	0.765547
cg00554631	DCHS2	NM_001142552	Body	S_Shelf	4	155560291	F	0.000468713	0.0376009	0.0842821	0.704949	0.72591	0.743559	0.633842	0.631688	0.656042
cg20116935	SEMA3B	NM_004636	TSS1500		3	50278761	F	0.000101045	0.0288336	0.0842754	0.728716	0.735509	0.747011	0.649837	0.640676	0.667897
cg00557536	ERC2	NM_015576	Body		3	56206058	R	0.000113606	0.0291294	0.0842712	0.842698	0.867238	0.836214	0.766115	0.768439	0.758783
cg08592234				S_Shore	13	111943795	F	0.000816494	0.0447486	0.0842652	0.68056	0.70132	0.725687	0.602324	0.623856	0.628591
cg06954368	OSMR	NM_003999	Body		5	38965837	R	6.32387e-05	0.0269557	0.0842644	0.747174	0.756098	0.731759	0.653866	0.658415	0.669957
cg23864752					4	4746476	F	0.000127121	0.0292137	0.0842312	0.863164	0.876176	0.88499	0.774981	0.795784	0.800872
cg16554145	OPN3	NM_014322	Body		1	239857573	F	0.00105097	0.0487409	0.08422	0.463415	0.416212	0.459166	0.370827	0.350799	0.364507
cg25750004	TBC1D16	NM_019020	Body	N_Shelf	17	75577277	R	0.000119925	0.0291649	0.0842011	0.80079	0.826514	0.829166	0.728271	0.732879	0.742718
cg13954067	VAV2	NM_001134398	Body	S_Shelf	9	135669479	R	4.73818e-05	0.0269557	0.0841948	0.827391	0.837418	0.811887	0.745072	0.743244	0.735796
cg02930348	CDH4	NM_001794	Body	S_Shelf	20	59402334	R	0.000399329	0.0361387	0.0841889	0.806761	0.820502	0.832364	0.732099	0.718971	0.755991
cg21572000	DCAF5	NM_003861	Body		14	68615946	F	8.11755e-05	0.0277514	0.0841882	0.782232	0.78773	0.775871	0.712012	0.698452	0.682805
cg14020285					2	119118135	R	1.00199e-05	0.0269557	0.0841817	0.598897	0.584308	0.591449	0.504001	0.505903	0.512204
cg02473594				N_Shore	7	153213218	F	0.000164377	0.0307314	0.0841772	0.809164	0.833611	0.839719	0.735483	0.753537	0.740943
cg00020348	OR6V1	NM_001001667	1stExon		7	142459664	R	8.34372e-06	0.0269557	0.0841608	0.814304	0.807554	0.80957	0.719715	0.725507	0.733724
cg16316058					5	4598334	R	0.000455053	0.0374074	0.0841526	0.67441	0.699679	0.671076	0.598801	0.614288	0.579618
cg23913077					10	111008437	R	0.000642863	0.0412081	0.0841386	0.805113	0.836831	0.844535	0.752827	0.728439	0.752798
cg13050716	MGLL	NM_007283	Body		3	128899270	F	0.000186196	0.0313812	0.0841191	0.643947	0.633614	0.658639	0.551701	0.577897	0.554244
cg05857728				N_Shelf	14	98651492	R	0.000343968	0.0350035	0.0841168	0.825206	0.833929	0.828556	0.769966	0.732946	0.732427
cg03302386	PLCD1	NM_006225	Body	N_Shore	3	38044208	F	0.000155697	0.0305139	0.0840782	0.845427	0.824945	0.850349	0.742459	0.759109	0.766919
cg08448622	HCG22	NR_003948	Body		6	31134084	F	0.000201313	0.0320018	0.0840738	0.896329	0.895224	0.878785	0.825448	0.795617	0.797053
cg17369115					6	9584436	F	0.000876594	0.0456332	0.0840594	0.794612	0.846343	0.828527	0.737768	0.734087	0.745449
cg12524640	FLJ42875	NR_024371	Body	N_Shore	1	2972916	R	0.000817303	0.0447486	0.0840431	0.755615	0.74719	0.73674	0.668094	0.683935	0.635387
cg05512111	IGSF11	NM_001015887	Body		3	120217446	R	0.000270643	0.0334098	0.0840427	0.700317	0.723851	0.736395	0.642494	0.641181	0.624761
cg17907200	LOC284661	NR_027088	TSS1500		1	4370881	F	0.000106106	0.0291071	0.0839906	0.768954	0.773534	0.785605	0.706499	0.677698	0.691924
cg16098726	GP9	NM_000174	TSS1500		3	130261428	R	0.000551788	0.0394202	0.0839862	0.730933	0.759863	0.736895	0.678925	0.6553	0.641507
cg15536401					7	119618444	F	0.000521287	0.0388412	0.0839818	0.838433	0.873412	0.857664	0.786553	0.776566	0.754445
cg07464125	KCNMA1	NM_001161353	Body		10	78613640	R	0.000680947	0.0419975	0.0839784	0.775783	0.782313	0.805613	0.692053	0.727072	0.692649
cg25890391					12	39224732	F	0.000381143	0.0359427	0.0839731	0.715781	0.748793	0.745309	0.665631	0.639261	0.653072
cg26215727	SCNN1A	NM_001159575	Body		12	6355798	R	0.000267472	0.0333192	0.0839608	0.76554	0.76379	0.771378	0.69882	0.690002	0.660004
cg08260278					11	6311748	R	0.000166148	0.0307475	0.0839509	0.847203	0.871506	0.867003	0.77535	0.792455	0.766054
cg04658679					12	123751876	R	1.12648e-05	0.0269557	0.0839442	0.849709	0.849605	0.863002	0.766184	0.774648	0.769652
cg27651090	MYO16	NM_015011	5'UTR		13	108068072	R	7.76865e-05	0.0275629	0.0839172	0.807769	0.831917	0.814156	0.723857	0.741804	0.736429
cg17521134	NCRNA00052	NR_026869	Body		15	85921999	R	0.000146746	0.0301803	0.0839053	0.778576	0.807215	0.788981	0.717472	0.709485	0.6961
cg18961788	DIO3OS	NR_002770	Body		14	101089079	R	0.000450022	0.0373935	0.0838821	0.800155	0.838027	0.828736	0.724487	0.747463	0.743322
cg23379309				N_Shore	9	101097149	F	0.000718127	0.0427262	0.0838756	0.388337	0.408269	0.404961	0.338901	0.318769	0.29227
cg25820223					7	41891929	F	0.000789231	0.0443075	0.0838749	0.783957	0.82794	0.79511	0.70879	0.73308	0.713513
cg27166177				Island	22	47884380	F	0.000400182	0.0361387	0.0838603	0.781231	0.823565	0.801407	0.713661	0.727432	0.713529
cg14756307	TPRX1	NM_198479	TSS1500	S_Shore	19	52999739	F	0.000158044	0.030634	0.0838566	0.719411	0.730059	0.729803	0.649928	0.655016	0.622759
cg24136431				N_Shore	19	51708463	R	0.00101879	0.0482685	0.0838482	0.803966	0.790176	0.798247	0.686708	0.740393	0.713743
cg19388930					11	129069583	F	0.000940126	0.046781	0.0838388	0.65539	0.688008	0.707811	0.60105	0.60568	0.592963
cg17588294					2	129264626	F	0.00027793	0.0334824	0.0838355	0.752835	0.735337	0.735385	0.652738	0.677487	0.641826
cg07931844	NR2E3	NM_014249	TSS1500	N_Shore	15	69889267	R	4.67405e-05	0.0269557	0.0838118	0.589715	0.590504	0.597235	0.517709	0.514518	0.493791
cg14894097					2	226882211	F	0.000908379	0.0462119	0.0838036	0.742768	0.775833	0.774099	0.684846	0.697444	0.658999
cg12320750	C17orf39	NM_024052	Body	S_Shore	17	17885700	F	0.000312487	0.0342828	0.0838032	0.786578	0.786418	0.81867	0.708302	0.706288	0.725667
cg10215185					8	50919420	R	0.000820943	0.0448192	0.0838009	0.840697	0.864932	0.866642	0.754861	0.76802	0.797988
cg27504861	CA10	NM_001082533	Body		17	47180313	F	0.000502271	0.0383553	0.0837754	0.637176	0.670279	0.670779	0.561328	0.589114	0.576465
cg00690280	WFDC10B	NM_172131	Body		20	43766147	R	0.000910477	0.0462579	0.0837649	0.730034	0.77251	0.77134	0.675212	0.685704	0.661674
cg26140366	TPO	NM_175719	Body	S_Shore	2	1461392	R	0.000775019	0.0440725	0.0837462	0.782568	0.791805	0.753282	0.701653	0.70182	0.672943
cg21890423					3	55370599	R	0.000377849	0.0359047	0.0837455	0.776251	0.751668	0.778023	0.676333	0.674161	0.704211
cg00692462	AJAP1	NM_018836	Body	S_Shore	1	4672949	F	0.00100593	0.0479768	0.0837356	0.796027	0.849425	0.81355	0.732385	0.741128	0.734283
cg25225483					17	3081566	R	0.000310212	0.0342577	0.0837284	0.777609	0.794772	0.800538	0.698547	0.727627	0.695559
cg09012125	KCNJ5	NM_000890	5'UTR		11	128284818	R	0.000980786	0.0475847	0.0836778	0.595737	0.638031	0.586865	0.522774	0.521212	0.525613
cg02006426				N_Shore	2	71865961	F	5.53171e-06	0.0269557	0.083676	0.756838	0.76022	0.760198	0.681773	0.674602	0.669853
cg02537883					12	17051891	R	0.000420063	0.0367271	0.0836734	0.790485	0.813071	0.79904	0.697899	0.737387	0.71629
cg17651164					2	235948012	R	0.000323445	0.0344885	0.0836582	0.880522	0.886298	0.884293	0.81389	0.77548	0.810769
cg15059743	KRT37	NM_003770	TSS200		17	36834406	F	1.9376e-05	0.0269557	0.0836489	0.731898	0.720526	0.734971	0.637196	0.648309	0.650944
cg01536956	RXRB	NM_021976	Body	N_Shelf	6	33273555	F	0.000751477	0.0435353	0.0836365	0.735744	0.72842	0.714104	0.619067	0.642374	0.665916
cg06047587					3	118601565	F	0.000199437	0.0319021	0.0836279	0.829424	0.861316	0.854731	0.774131	0.765238	0.75522
cg17242981					1	242502556	R	4.62607e-05	0.0269557	0.0836262	0.780809	0.787751	0.793268	0.689887	0.708965	0.712098
cg13985446				S_Shelf	9	98492168	F	0.00102135	0.0483009	0.0836106	0.843649	0.891405	0.865222	0.777437	0.773037	0.79897
cg15002713					2	18955722	F	0.000131146	0.0293997	0.0835944	0.718791	0.736175	0.72309	0.659405	0.630948	0.636919
cg20328399	FBXL7	NM_012304	Body	Island	5	15981089	R	0.000276117	0.0334422	0.0835717	0.789538	0.786713	0.793572	0.696373	0.729922	0.692813
cg02173583	LOC100169752	NR_023362	Body		10	127253491	F	0.000863545	0.0454483	0.0835716	0.775544	0.82225	0.794665	0.728183	0.704297	0.709264
cg04935792					12	43640449	R	0.000374342	0.0358007	0.0835596	0.860098	0.85087	0.872004	0.79449	0.756148	0.781656
cg07901571	GPR111	NM_153839	3'UTR		6	47773182	R	0.000597508	0.0403941	0.0835563	0.824526	0.853185	0.866928	0.777649	0.75493	0.761391
cg08273672	UCHL1	NM_004181	Body	S_Shelf	4	40957115	F	0.000463563	0.0375331	0.0835497	0.797744	0.832326	0.832257	0.724229	0.739599	0.747849
cg10787981	INSC	NM_001031853	Body		11	15105575	F	0.000124523	0.0292042	0.0835442	0.818809	0.827179	0.800678	0.743906	0.722953	0.729175
cg03530006				N_Shelf	13	37818380	R	0.000620231	0.040773	0.0835305	0.846808	0.878617	0.895574	0.789156	0.79157	0.789682
cg23400222					5	124700605	F	0.000663824	0.0416505	0.083526	0.839887	0.872006	0.841183	0.750127	0.7849	0.76747
cg04575427	SPINT3	NM_006652	TSS1500		20	43578125	R	0.000699764	0.042342	0.0835232	0.789779	0.8151	0.834754	0.727673	0.742359	0.71903
cg06621425	PTPRN2	NM_002847	Body	S_Shore	7	157675350	F	0.000176284	0.0310789	0.0835229	0.756177	0.766712	0.779871	0.699551	0.670783	0.681856
cg20097712					11	123677657	F	0.000179008	0.0311218	0.0835086	0.837193	0.831148	0.863232	0.766056	0.751272	0.763718
cg16120196				S_Shelf	1	2912429	F	1.38486e-05	0.0269557	0.0835041	0.813665	0.804366	0.814948	0.722753	0.736019	0.723695
cg16878549	NAV2	NM_182964	Body		11	19797227	F	1.83007e-05	0.0269557	0.0834833	0.814767	0.830447	0.81172	0.734221	0.734087	0.738177
cg08072840					3	20423287	R	0.001	0.0478897	0.0834703	0.80926	0.791497	0.839333	0.72966	0.716973	0.743047
cg10761558	SSBP3	NM_001009955	Body		1	54614793	F	3.95922e-05	0.0269557	0.0834478	0.830604	0.819258	0.844208	0.743973	0.749795	0.749959
cg05207637					16	72692396	F	0.000126366	0.0292137	0.0834439	0.646092	0.646613	0.643784	0.572568	0.542124	0.571466
cg22703124	LOC100128675	NR_024562	Body	N_Shore	19	40242349	R	0.000236313	0.0327587	0.0834268	0.788302	0.806924	0.812998	0.704164	0.734802	0.718978
cg12614283	MAGEC1	NM_005462	TSS1500		X	140818711	F	0.000674505	0.0419026	0.0834252	0.670239	0.662044	0.643766	0.560323	0.599594	0.565857
cg25053018					2	173186241	F	0.000485309	0.0380395	0.0834174	0.845321	0.842729	0.850789	0.762799	0.785992	0.739795
cg23179976				S_Shelf	7	122316943	F	0.000652948	0.0414369	0.0834109	0.558992	0.546693	0.538772	0.472924	0.438917	0.482383
cg17835455					12	82988261	F	0.000286029	0.0336218	0.0833875	0.786286	0.807884	0.808392	0.736552	0.706138	0.70971
cg09851650	PLA2G2F	NM_022819	TSS1500		1	20337873	R	4.92094e-05	0.0269557	0.0833716	0.774807	0.793956	0.790514	0.713598	0.69831	0.697254
cg00574742					5	2276624	F	0.000362331	0.0355752	0.0833673	0.838694	0.812359	0.853117	0.75474	0.742752	0.756576
cg01538605				N_Shore	6	169027882	F	0.000425414	0.0368308	0.0833673	0.759883	0.772372	0.741341	0.66165	0.693223	0.668622
cg19667813					4	3765203	R	0.000200196	0.031971	0.0833656	0.624421	0.655829	0.645544	0.547482	0.568821	0.559394
cg08687753	NOX4	NM_001143837	5'UTR		11	88874576	F	7.18916e-05	0.0269557	0.0833626	0.677817	0.694226	0.705705	0.609896	0.60329	0.614474
cg27591371	C6orf47	NM_021184	1stExon	N_Shore	6	31735612	R	0.000728911	0.0430189	0.0833528	0.498026	0.523222	0.538652	0.430269	0.425462	0.454111
cg16171105					1	18077983	R	0.00103861	0.0485737	0.083352	0.745807	0.768196	0.754906	0.687803	0.687263	0.643787
cg24143729	RASA3	NM_007368	Body		13	113838963	R	2.27062e-05	0.0269557	0.0833489	0.873654	0.883823	0.891248	0.806883	0.794183	0.797613
cg11098525	MAEA	NM_005882	Body	Island	4	1310231	R	7.10827e-05	0.0269557	0.0833484	0.975767	0.956132	0.971609	0.880545	0.896849	0.876069
cg11819201	FMO6P	NR_002601	TSS1500		1	169372549	R	0.000222102	0.0325755	0.0832963	0.750018	0.772743	0.74003	0.659188	0.6785	0.675213
cg04664309					6	16276437	F	0.000910065	0.0462442	0.08329	0.795104	0.840722	0.822984	0.732192	0.724978	0.75177
cg24667437					5	30643928	F	0.000584901	0.0400946	0.0832732	0.800654	0.814618	0.827801	0.710587	0.731565	0.751101
cg18914258					4	12512984	R	0.000192564	0.0315943	0.0832544	0.767354	0.798409	0.798508	0.711993	0.702705	0.699809
cg20655792	CD97	NM_001025160	Body	Island	19	14377815	R	0.000356668	0.035481	0.0832519	0.325298	0.304672	0.283724	0.217891	0.216884	0.229162
cg11009001	C6orf118	NM_144980	Body		6	165635230	R	0.00109078	0.0494531	0.0832394	0.781356	0.818475	0.776224	0.716564	0.719094	0.69068
cg27655954					8	10790570	R	0.00012261	0.0291709	0.0832379	0.869814	0.857092	0.857496	0.795782	0.766148	0.772759
cg26350784					5	154835115	R	0.000291805	0.0337564	0.0832231	0.784127	0.815453	0.777717	0.715492	0.705776	0.70636
cg10889556	KRT84	NM_033045	3'UTR		12	51057945	R	0.00040691	0.0363067	0.0831952	0.778791	0.799333	0.794866	0.724166	0.713359	0.685878
cg26922483					15	95123842	R	0.000401103	0.036147	0.0831589	0.705128	0.739726	0.725673	0.62591	0.654165	0.640975
cg13710297	ERC2	NM_015576	Body		3	55728020	R	2.74719e-05	0.0269557	0.0831563	0.689838	0.688355	0.673538	0.606916	0.592663	0.602683
cg06630988	TMEM132B	NM_052907	Body		12	124701329	F	0.000269306	0.0333385	0.0831315	0.749784	0.732162	0.770038	0.670479	0.658629	0.673482
cg04648382	RAD52	NM_134424	Body		12	893041	F	0.000356922	0.035481	0.0831294	0.829318	0.834354	0.833842	0.728673	0.771889	0.747564
cg04956624					11	115743566	R	1.51231e-05	0.0269557	0.0831292	0.718812	0.719971	0.724703	0.638381	0.62879	0.646928
cg08514779					13	110874556	R	0.000477718	0.0378175	0.083083	0.777198	0.788156	0.818592	0.717839	0.715646	0.701212
cg01311170					17	36422933	F	3.12266e-05	0.0269557	0.0830534	0.836717	0.82168	0.820153	0.749847	0.744967	0.734575
cg17287605	PTPRN2	NM_002847	Body	N_Shore	7	157889655	R	0.000795253	0.0443912	0.0830462	0.792138	0.828033	0.807803	0.747933	0.715671	0.715233
cg16739544				N_Shore	16	84076293	F	0.000849056	0.0453116	0.0830261	0.678999	0.675161	0.710911	0.624628	0.590189	0.601176
cg00921097	GPR37L1	NM_004767	TSS1500		1	200357603	R	0.000578711	0.039994	0.0830244	0.72189	0.718536	0.75587	0.635137	0.660002	0.652084
cg03976543	SH3TC1	NM_018986	Body		4	8272001	R	0.000205638	0.0321699	0.0830189	0.890124	0.867713	0.896367	0.791841	0.798214	0.815093
cg20003377					4	150168662	F	2.15414e-05	0.0269557	0.0830101	0.814585	0.809066	0.8023	0.715476	0.731232	0.730213
cg17183215	SKI	NM_003036	Body		1	2190844	R	0.000609338	0.0405984	0.0829785	0.933855	0.932566	0.942413	0.838784	0.840212	0.880902
cg10476689					7	50874080	F	0.000223642	0.0326109	0.0829774	0.812819	0.834504	0.829349	0.737621	0.729614	0.760505
cg22724167				N_Shelf	15	25458183	R	0.000401561	0.036164	0.0829715	0.807588	0.825953	0.809486	0.733752	0.710331	0.75003
cg00423291	C7orf10	NM_024728	Body		7	40822164	R	0.000113394	0.029118	0.0829643	0.736342	0.752908	0.756306	0.663434	0.679408	0.653821
cg03962217	LOC202781	NR_028090	Body	S_Shore	7	154427364	F	5.84764e-05	0.0269557	0.0829326	0.862239	0.864973	0.881707	0.780266	0.797685	0.78217
cg20522675	TPRG1L	NM_182752	TSS1500	N_Shore	1	3529937	R	2.70376e-05	0.0269557	0.0829323	0.726594	0.707727	0.727255	0.637026	0.63485	0.640903
cg07977614	PLD5	NM_152666	Body		1	240376768	R	0.000229631	0.0327478	0.0829304	0.419483	0.438671	0.454522	0.359359	0.344212	0.360314
cg05769086					7	54992311	F	0.00013356	0.0294877	0.0829265	0.805639	0.827079	0.794171	0.731449	0.721773	0.724887
cg14703224	SST	NM_001048	TSS1500	S_Shore	3	188872109	F	0.000376456	0.03585	0.082906	0.616628	0.636396	0.599177	0.52091	0.541666	0.540907
cg16900102					7	98121348	R	0.000903969	0.046133	0.0828917	0.735664	0.77398	0.760844	0.691123	0.675861	0.654829
cg23118721					8	94202276	R	0.000271555	0.0334099	0.0828899	0.858309	0.873628	0.864865	0.788397	0.798203	0.761533
cg03534410	TMEM40	NM_018306	TSS1500		3	12776112	F	8.52561e-06	0.0269557	0.0828836	0.782283	0.776555	0.790456	0.700415	0.697072	0.703156
cg06176750	RBMXL2	NM_014469	3'UTR	S_Shore	11	7068932	F	0.000702652	0.0423958	0.0828796	0.83287	0.870333	0.822972	0.75759	0.763333	0.756613
cg10652833				N_Shelf	15	75895617	R	0.00059028	0.0402632	0.0828652	0.788775	0.781946	0.823397	0.711066	0.708069	0.726387
cg04416302					11	31100094	F	0.000426089	0.0368308	0.0828526	0.809768	0.817977	0.801556	0.751198	0.716213	0.713333
cg19183252					4	120885389	F	0.00104994	0.0487295	0.0828493	0.517992	0.538274	0.557106	0.475233	0.436636	0.452955
cg07870237	ACSL6	NM_015256	TSS1500	S_Shore	5	131376330	F	0.000184511	0.0313678	0.0828483	0.18538	0.189725	0.158984	0.0856218	0.0974391	0.102484
cg26837853	CSMD1	NM_033225	Body		8	3957526	R	0.000907734	0.0462094	0.0828152	0.782125	0.808239	0.826252	0.727845	0.734271	0.706054
cg03539267					10	133673889	F	0.000306486	0.034136	0.0828075	0.678383	0.652991	0.676484	0.572225	0.584155	0.603055
cg03890505					12	125787735	R	0.000220246	0.0325755	0.0827893	0.794732	0.804457	0.819275	0.705987	0.733199	0.73091
cg11837181	PRDM16	NM_022114	Body	S_Shore	1	2990862	F	7.11143e-06	0.0269557	0.0827851	0.81944	0.829587	0.820092	0.741204	0.735814	0.743747
cg25952964	EDAR	NM_022336	TSS1500		2	108973704	F	0.000198036	0.031819	0.0827813	0.855399	0.86419	0.864006	0.793128	0.757834	0.784288
cg02907524	AGBL1	NM_152336	TSS1500		15	84484987	F	0.000533517	0.0390697	0.0827812	0.759695	0.793457	0.796337	0.71433	0.695016	0.691801
cg25366404	MOCS1	NM_005943	5'UTR		6	40003338	F	0.000565877	0.0397521	0.0827794	0.800277	0.80798	0.801687	0.702488	0.747369	0.711749
cg25284213	MIR206	NR_029713	Body		6	52117113	R	0.000633431	0.0410512	0.0827723	0.750615	0.787538	0.781574	0.702629	0.674213	0.694567
cg17863076	REG1B	NM_006507	Body		2	79166172	R	8.0696e-06	0.0269557	0.0827559	0.814663	0.815068	0.806428	0.724817	0.727538	0.735537
cg10859789	COL6A3	NM_004369	Body		2	237917156	R	0.00092111	0.0464714	0.0827357	0.852612	0.857533	0.841076	0.793562	0.742899	0.766553
cg00895324	PCP4	NM_006198	TSS1500		21	40160387	R	0.000140414	0.0299025	0.0827224	0.776235	0.796294	0.806751	0.718826	0.709955	0.702331
cg08826184	NELL2	NM_001145110	Body		12	43259533	R	0.00089253	0.0458966	0.0827189	0.821757	0.838901	0.792826	0.748636	0.733287	0.723405
cg01664151	FSTL4	NM_015082	5'UTR	N_Shore	5	132973191	R	6.46731e-06	0.0269557	0.0827156	0.81819	0.815776	0.815258	0.727862	0.732611	0.740605
cg05956518	LMF1	NM_022773	TSS1500	S_Shore	16	961781	F	0.000115566	0.0291527	0.0827109	0.747837	0.763687	0.780093	0.685705	0.676485	0.681293
cg14114377	MARK4	NM_031417	Body	S_Shore	19	50448685	R	0.000146921	0.0301803	0.0827062	0.738201	0.748227	0.770873	0.66552	0.676489	0.667173
cg26620314					16	64596310	R	0.000797185	0.0444408	0.0827005	0.818737	0.82448	0.82124	0.768199	0.720511	0.727645
cg26821962					12	60185522	R	0.000315034	0.0343137	0.0826973	0.76254	0.758772	0.795731	0.683456	0.690922	0.694573
cg10019018				S_Shore	12	117698404	R	8.21843e-06	0.0269557	0.082679	0.805863	0.794733	0.804825	0.721807	0.714281	0.721296
cg02657611	TESK2	NM_007170	Body		1	45587219	R	0.000548256	0.0393605	0.0826542	0.753341	0.762981	0.761541	0.694228	0.650254	0.685419
cg09608533	CPXM2	NM_198148	Body	S_Shore	10	125608178	F	0.00104127	0.0486197	0.0826402	0.737164	0.764677	0.739886	0.663977	0.687739	0.642091
cg13817265	SOX5	NM_152989	5'UTR		12	23995624	R	0.000383867	0.036029	0.0826382	0.802819	0.827171	0.809722	0.723359	0.717222	0.751217
cg18015393					8	13619069	F	5.53566e-05	0.0269557	0.0826222	0.745674	0.753216	0.731008	0.658944	0.653495	0.669593
[truncated: 6,909 more rows]
