# Supplementary material for: Variants of DNMT3A cause transcript-specific DNA methylation patterns and affect hematopoiesis
Source: Life Sci Alliance. 2018 Dec 13;1(6):e201800153. doi: 10.26508/lsa.201800153 (PMC6293073; doi:10.26508/lsa.201800153)
Supplement: Supplementary file 2 [file LSA-2018-00153_TableS2.xlsx]

## Sheet: Tabelle1
Table S2. Statistical significance of chromatin enrichment analysis.
Histone mark	Comparison 1	Comparison 2	P value
H3K4me1	Background	KD Tr.1+3 hypomethylated	2.13*10-44
	Background	KD Tr.2 hypomethylated	6.09*10-46
	Background	KD Tr.2 hypermethylated	7.86*10-116
	KD Tr.2 hypomethylated	KD Tr.2 hypermethylated	9.02*10-69
H3K4me3	Background	KD Tr.1+3 hypomethylated	0.57
	Background	KD Tr.2 hypomethylated	0.4
	Background	KD Tr.2 hypermethylated	7.39*10-270
	KD Tr.2 hypomethylated	KD Tr.2 hypermethylated	9.89*10-17
H3K27me3	Background	KD Tr.1+3 hypomethylated	6.07*10-24
	Background	KD Tr.2 hypomethylated	1.08*10-16
	Background	KD Tr.2 hypermethylated	9.2*10-133
	KD Tr.2 hypomethylated	KD Tr.2 hypermethylated	5.78*10-36
H3K9me3	Background	KD Tr.1+3 hypomethylated	2.65*10-17
	Background	KD Tr.2 hypomethylated	7.45*10-11
	Background	KD Tr.2 hypermethylated	4.54*10-105
	KD Tr.2 hypomethylated	KD Tr.2 hypermethylated	2.12*10-26
Statistical significance was calculated with the Mann–Whitney test.
