# Supplementary material for: Variants of DNMT3A cause transcript-specific DNA methylation patterns and affect hematopoiesis
Source: Life Sci Alliance. 2018 Dec 13;1(6):e201800153. doi: 10.26508/lsa.201800153 (PMC6293073; doi:10.26508/lsa.201800153)
Supplement: Supplementary file 3 [file LSA-2018-00153_TableS3.xlsx]

## Sheet: (A) KD Tr.1+3 genes
30 genes upregulated upon knockdown of Tr.1+3
Gene Name	log2FC	P-value	adj. P-value	Tr.1+3_1	Tr.1+3_2	Tr.1+3_3	Scramble_1	Scramble_2	Scramble_3
GYPA	-2.64036	0.000166449	0.0486479	5.16911	6.64993	5.72671	2.89108	4.25224	2.48134
VNN1	-2.06818	0.000147998	0.0470592	6.61047	7.92813	6.89394	5.02746	5.65734	4.54319
SLCO2B1	-2.0597	4.31452e-06	0.0231223	7.87613	7.97805	8.07614	6.35937	5.35855	6.03329
MICAL2	-1.85681	7.27578e-06	0.0231223	6.43551	6.85717	6.89569	4.67316	5.34783	4.59694
HBE1	-1.5451	6.52762e-05	0.0291059	5.93337	6.94809	6.21088	4.7682	4.96675	4.72209
PIK3IP1	-1.50269	0.000152297	0.0471518	7.08132	6.76374	6.27473	5.7107	4.88924	5.01177
GGTA1P	-1.47755	5.52694e-05	0.0270935	7.32237	7.06754	7.17568	6.18277	5.2352	5.71497
PLAT	-1.4027	0.00018153	0.0486479	7.13298	8.06328	7.16485	5.94245	6.2785	5.93205
UPK1A-AS1	-1.37312	5.14942e-05	0.0270935	7.1773	7.05844	7.04537	6.07912	5.25253	5.8301
RAB31	-1.3637	9.36822e-05	0.036739	7.42803	8.34553	7.91275	6.40414	6.67444	6.51662
IPCEF1	-1.35566	3.9569e-05	0.0258627	7.27953	7.07053	7.30116	6.21317	5.46296	5.90812
LXN	-1.35428	2.65114e-05	0.0243371	7.98813	7.73433	7.41122	6.53221	6.42918	6.10945
NPR3	-1.23107	0.000106728	0.0384825	6.8819	6.214	6.77245	5.17503	5.59433	5.40578
CLEC2B	-1.19634	6.6515e-05	0.0291059	5.872	6.28735	6.06924	4.65963	5.20234	4.7776
CD244	-1.14224	1.0571e-05	0.0231223	7.52401	7.74107	7.57485	6.49667	6.36816	6.54838
SUCNR1	-1.13273	1.37574e-05	0.0231223	8.14307	8.10086	8.27474	7.08921	6.88101	7.15026
CPQ	-1.12881	2.11658e-05	0.0243371	6.54045	6.90353	6.59484	5.5144	5.63209	5.50591
OR2AT4	-1.12842	0.000191288	0.0497539	6.24721	5.73066	6.4633	5.13833	4.85073	5.06685
FNIP2	-1.06063	8.43283e-05	0.035433	8.13388	8.33621	7.95051	7.22797	6.83649	7.17426
PLXNC1	-1.03184	3.2051e-05	0.0243371	6.81634	7.02577	7.09579	5.85739	6.0419	5.94309
GBP5	-1.01975	4.34773e-05	0.0269216	5.74762	5.51311	5.44921	4.68115	4.48402	4.48552
UCP2	-1.01842	9.04453e-05	0.0366927	8.48605	8.5446	8.57784	7.53642	7.25004	7.76676
MAML2	-1.01503	2.37604e-05	0.0243371	5.05272	5.25059	5.22699	4.11101	4.21116	4.16304
DEPTOR	-1.01441	6.67964e-05	0.0291059	6.19505	6.20153	6.49287	5.10235	5.34984	5.39403
PIK3CB	-0.987123	5.06017e-05	0.0270935	10.2442	10.0407	10.2617	9.18382	9.06794	9.33345
SERPINE2	-0.95252	4.73846e-05	0.0270935	8.26774	8.26183	8.25026	7.38723	7.38794	7.1471
TFPI	-0.93611	0.000140668	0.0460815	7.61768	8.01185	7.65508	6.75446	6.9427	6.77912
CPED1	-0.901883	5.39207e-05	0.0270935	6.08691	6.14743	6.12685	5.31305	5.19482	5.14767
AKT3	-0.872473	0.000194533	0.0497539	7.30109	7.13857	6.95823	6.32497	6.34845	6.10705
EPS15	-0.85468	9.7953e-05	0.0371748	9.65384	9.80188	9.81208	8.81852	8.96393	8.92131
16 genes downregulated upon knockdown of Tr.1+3
Gene Name	log2FC	P-value	adj. P-value	Tr.1+3_1	Tr.1+3_2	Tr.1+3_3	Scramble_1	Scramble_2	Scramble_3
FHL1	1.58888	1.66692e-05	0.0243371	6.15754	5.60693	6.11845	7.8853	7.50451	7.25974
PSMD10	1.54094	6.03896e-07	0.00710483	5.59774	5.69311	5.73721	7.09158	7.27414	7.28517
CATSPERB	1.53883	9.75839e-06	0.0231223	3.36522	3.65522	3.74946	4.87656	5.48104	5.02878
SLC1A1	1.42082	0.000117531	0.040669	3.97912	3.76212	3.61812	5.68723	5.24349	4.69111
BDNF	1.37655	1.33818e-05	0.0231223	6.20669	5.74402	6.23206	7.62065	7.37439	7.31739
PRKG1	1.37127	3.51662e-05	0.0243371	6.97422	6.72401	6.4576	8.40897	8.04873	7.81193
PPME1	1.26239	2.5732e-05	0.0243371	6.16257	6.62102	6.41379	7.4708	7.88511	7.62863
ACVR2A	1.15369	0.000171685	0.0486479	5.86576	5.33956	5.72628	6.98194	6.44211	6.96861
PTCH1	1.10618	3.41552e-05	0.0243371	6.23844	6.29128	6.55788	7.37234	7.37632	7.65747
TJP1	1.03309	3.23869e-05	0.0243371	4.1017	4.07126	4.10175	5.07498	4.98133	5.31767
PIGN	0.999603	2.79854e-05	0.0243371	7.6979	7.67554	7.86761	8.82171	8.70523	8.71292
GPR155	0.98452	0.000107941	0.0384825	5.80247	5.92753	6.00646	7.13545	6.88266	6.67191
C3orf80	0.972737	0.00017642	0.0486479	4.33772	4.6761	4.33096	5.53763	5.55071	5.17466
ITGB1BP2	0.893377	0.000174835	0.0486479	3.79371	4.2238	3.97602	4.89195	4.9551	4.82661
GOLGB1	0.867437	0.000181939	0.0486479	8.52103	8.38934	8.57684	9.16161	9.51335	9.41456
MYO6	0.864443	0.000141006	0.0460815	4.13544	4.30836	4.28973	5.11008	4.96197	5.25481

## Sheet: (B) KD Tr.2 genes
155 genes upregulated upon knockdown of Tr.2
Gene Name	log2FC	P-value	adj. P-value	Tr.2_1	Tr.2_2	Tr.2_3	Scramble_1	Scramble_2	Scramble_3
ME1	-3.42549	3.34944e-06	0.00328466	9.42893	8.73064	9.28848	4.78724	6.50463	5.87971
LYVE1	-3.15894	4.2109e-05	0.0108586	10.0243	8.72932	8.61709	6.63796	6.31564	4.94034
BIRC3	-2.67222	3.80721e-06	0.00328466	8.74451	8.07905	8.44661	6.33332	5.84049	5.07969
CTSG	-2.49609	5.79253e-08	0.000692381	9.85067	10.2195	9.73388	7.26197	7.43162	7.62218
PDE8B	-2.02201	0.000117862	0.0171805	7.2614	7.71329	8.37168	5.22992	5.61759	6.43284
PLA2G7	-1.99812	2.8047e-05	0.0103507	4.24299	4.4548	5.36594	2.43949	2.99366	2.63622
RAB31	-1.9607	9.26466e-07	0.00276422	8.14689	8.78616	8.54425	6.40414	6.67444	6.51662
NR5A2	-1.93942	0.000461707	0.0326556	7.67163	6.13106	6.01238	4.97218	4.63481	4.38983
ETS1	-1.8895	0.000273254	0.0241941	8.46082	7.06973	7.21448	6.09648	5.7097	5.27035
STXBP5L	-1.74539	7.85895e-07	0.00276422	4.69852	4.21737	4.34071	2.66514	2.70396	2.65134
ADAM28	-1.71512	3.888e-05	0.0108586	6.49629	7.20788	7.15196	4.7705	5.46766	5.47262
FGL2	-1.66835	3.84717e-06	0.00328466	5.75017	6.23396	5.97343	4.13559	4.60002	4.2169
RNASE2	-1.65075	2.96159e-05	0.0103507	8.81999	9.35863	8.84662	6.96631	7.78481	7.32187
IPCEF1	-1.6236	1.92069e-05	0.00819927	7.65457	7.18218	7.61829	6.21317	5.46296	5.90812
PVALB	-1.58415	0.000473989	0.0331243	4.58537	5.61636	6.0564	3.77051	3.73601	3.99915
CYYR1	-1.56999	0.000132717	0.0180823	7.7055	6.94481	7.56145	5.78106	5.39867	6.32205
LY86	-1.56546	9.46841e-05	0.0156329	5.14487	6.14483	6.03034	4.03045	4.40493	4.18829
ELANE	-1.56509	2.35401e-06	0.00328466	10.2683	10.555	10.1739	8.96023	8.68304	8.65877
CD34	-1.54827	0.000108863	0.0168493	7.24131	8.20599	8.07858	6.0106	6.3581	6.51237
CHRM3	-1.53868	8.23012e-05	0.0151346	4.83029	5.43265	5.27159	3.11757	3.9486	3.85232
CCL2	-1.51151	3.17197e-06	0.00328466	5.31352	5.15727	5.04392	3.74481	3.82509	3.41029
GGTA1P	-1.48747	0.000168971	0.0195097	7.35195	6.78553	7.45787	6.18277	5.2352	5.71497
PRTN3	-1.48662	1.55626e-05	0.00782499	10.0699	10.0405	9.79774	8.62584	8.08715	8.73525
AZU1	-1.48344	8.25744e-06	0.00616882	8.37515	8.78577	8.19949	7.10405	6.93216	6.87389
MPP6	-1.46407	6.75976e-05	0.0139309	6.20651	6.69313	6.48063	4.49994	5.22653	5.2616
EDA2R	-1.46342	0.000115653	0.0171805	6.01504	5.99876	6.71329	4.63063	4.51542	5.19077
TNFRSF9	-1.46193	2.18373e-05	0.00900073	5.64254	5.63403	5.52545	3.94671	4.58597	3.88355
HSDL2	-1.44345	6.03909e-05	0.0128902	6.85445	7.32273	7.24942	5.26292	5.78175	6.05159
LYZ	-1.44234	2.23063e-06	0.00328466	11.6199	11.6059	11.6791	10.1993	10.0045	10.3742
CXorf21	-1.42785	0.000242863	0.0228578	5.54793	6.57604	6.43327	4.54347	4.73887	4.99135
VCAN	-1.4055	0.000141647	0.0188123	4.45113	4.22807	5.21654	3.2627	3.08772	3.32883
MS4A3	-1.39745	4.58502e-05	0.0111847	8.44853	9.023	8.69137	6.96424	7.52851	7.4778
ALCAM	-1.38698	0.00110562	0.0499197	7.19753	7.43157	7.80188	5.43272	6.02847	6.80885
TRIM22	-1.38634	0.000207949	0.0216141	6.10637	6.38481	6.85864	4.59185	5.24641	5.35254
FAM105A	-1.37526	2.8081e-05	0.0103507	6.42456	7.05381	6.62962	5.51654	5.3221	5.14358
BCL2A1	-1.37054	0.000495962	0.0333171	5.81125	4.59711	5.26059	3.60565	3.94887	4.00281
CAMK2D	-1.36014	1.57115e-05	0.00782499	7.61061	7.02682	7.45642	5.96881	5.94293	6.10169
NEFH	-1.35166	0.000699553	0.0409808	6.18035	7.15232	6.95273	4.94017	5.80114	5.48912
GBP5	-1.35071	2.60503e-06	0.00328466	5.99533	5.82394	5.88355	4.68115	4.48402	4.48552
CYBB	-1.34731	1.89671e-05	0.00819927	6.97695	7.60332	7.25476	5.93039	6.00876	5.85396
FNDC3B	-1.33887	0.000133125	0.0180823	7.86402	8.49932	8.15978	6.41217	6.97869	7.11564
CECR1	-1.33616	0.000638204	0.0385276	6.17181	7.23557	7.11749	5.17504	5.6068	5.73455
SAMHD1	-1.32951	0.000221196	0.0220329	7.01681	7.64371	7.56188	5.61449	6.22012	6.39925
TMEM71	-1.32445	0.000167953	0.0195097	4.93846	5.17739	5.71994	3.65016	3.94983	4.26244
GLIPR1	-1.31949	0.000801827	0.0435678	8.31887	9.31557	8.72439	7.03203	7.91794	7.45039
TECTA	-1.31125	0.000384685	0.0308148	6.29701	5.21617	5.7369	4.63568	4.21543	4.46523
IFI30	-1.28743	3.03083e-05	0.0103507	6.24475	6.37978	6.81677	5.35207	5.1375	5.08943
TMEFF2	-1.28653	5.30691e-05	0.0117469	5.57338	5.27441	5.94927	4.22475	4.20613	4.50659
TFEC	-1.28443	3.31553e-05	0.0105628	7.8415	8.03126	8.20434	6.43619	6.7928	6.99481
PDE3B	-1.28193	9.10173e-05	0.0156329	6.08119	6.67067	6.82543	5.06531	5.30802	5.35818
UNC13A	-1.26598	8.53112e-05	0.0151367	3.99622	4.58453	4.7662	3.10684	3.22531	3.21687
PLXNC1	-1.26216	0.000109951	0.0168493	6.72666	7.43788	7.46431	5.85739	6.0419	5.94309
BEX1	-1.2575	4.26966e-05	0.0108586	6.0205	6.19624	5.63036	4.78699	4.80683	4.48079
ACPP	-1.24868	0.000983075	0.0473818	4.75629	5.76185	5.41931	3.74828	3.93531	4.50783
KDR	-1.24011	0.000182807	0.0195097	5.46145	4.668	4.72392	3.77433	3.80173	3.55697
CA8	-1.21621	1.13329e-05	0.00745573	5.00438	5.13064	5.29055	3.7829	3.9348	4.05924
SCG3	-1.20367	0.000663916	0.0392861	2.72875	3.74531	3.66109	2.26125	2.17856	2.08432
SERPINB10	-1.19899	0.00095194	0.0466334	6.11153	6.93327	6.29435	4.76195	5.57806	5.40218
PLAC8	-1.19234	0.000790073	0.0435008	8.85556	9.76649	9.23093	7.67557	8.31112	8.28927
DYNLT3	-1.18319	4.49909e-05	0.0111847	6.81784	6.68114	6.88537	5.37458	5.53325	5.92695
ACTA2	-1.17987	0.000182627	0.0195097	7.21673	6.63025	6.54395	5.68368	5.37388	5.79377
MPEG1	-1.17853	0.000157216	0.0195097	6.17585	6.34077	6.95493	5.33363	5.28707	5.31526
SESN3	-1.17166	0.000109689	0.0168493	7.62576	8.35807	7.9941	6.77118	6.91073	6.78103
SBF2	-1.16997	0.000896318	0.045397	5.99807	6.56395	6.44933	4.66346	5.6616	5.17639
P2RY8	-1.1625	0.000166822	0.0195097	6.80579	7.39561	6.91019	5.5933	5.93184	6.09894
MS4A6A	-1.14344	3.49055e-05	0.0105628	5.04776	5.37378	5.38365	3.94042	4.27062	4.16384
BTG2	-1.13892	0.000180751	0.0195097	7.19176	6.59416	6.61457	5.89561	5.59979	5.48833
HLA-DRA	-1.12119	0.000271968	0.0241941	9.7168	10.1121	10.1441	8.50828	9.21466	8.88651
IGSF6	-1.11738	5.00695e-05	0.0117349	5.71945	6.03892	5.81599	4.73677	4.95726	4.52819
SORL1	-1.10869	0.000247041	0.0230694	6.96446	7.46506	7.35478	5.79205	6.35362	6.31255
TIMP2	-1.10598	0.000277851	0.0243772	6.29507	6.87213	6.86129	5.2793	5.66578	5.76548
CSF3R	-1.09176	0.0002794	0.0243772	7.39355	7.99312	7.88666	6.37755	6.75726	6.86324
AMPD3	-1.07726	5.19628e-05	0.0117469	6.72322	6.68277	6.54286	5.45542	5.83347	5.42818
CXCL11	-1.07651	0.000479624	0.0331243	4.55701	4.44343	5.14694	3.38408	3.65556	3.87822
PRSS57	-1.07303	0.00108313	0.0496039	7.84986	8.58394	8.03375	6.73077	7.47609	7.04161
MERTK	-1.0688	0.00017583	0.0195097	5.62869	5.93398	6.11329	4.57883	4.81008	5.08064
IL6R	-1.06472	0.00010077	0.0160601	7.01025	7.50998	7.14766	6.32817	6.08123	6.06433
FAS	-1.06298	2.51286e-05	0.0100121	6.94797	6.76786	6.79595	5.65681	5.75436	5.91168
SPP1	-1.0436	0.000978008	0.0473818	4.38404	5.0563	5.04774	3.51883	4.14294	3.69551
CTSS	-1.02655	0.000873069	0.0451659	5.81538	6.53412	6.61757	5.09743	5.45928	5.3307
RHOBTB1	-1.02623	0.000117651	0.0171805	7.5061	7.77678	7.43755	6.49723	6.78875	6.35577
ADAMDEC1	-1.02322	3.53479e-05	0.0105628	4.00957	4.22198	4.31998	3.14558	3.2034	3.1329
TM4SF1	-1.02034	0.00106104	0.0493485	4.57745	5.29713	5.18874	4.14254	4.20981	3.64996
RNASE3	-1.01807	3.92354e-05	0.0108586	7.22707	7.30847	7.01939	6.10872	6.13158	6.26043
NFE2L3	-1.01046	0.00037661	0.0308148	6.56209	6.18023	6.09323	5.15288	5.59693	5.05437
TLR2	-1.00125	0.000930833	0.046167	5.88097	6.19689	6.13252	4.5795	5.21628	5.41085
CSF1R	-0.999713	7.27843e-05	0.0144445	6.38712	6.6223	6.75894	5.46338	5.63102	5.67482
MNDA	-0.999017	8.43527e-05	0.0151367	5.40042	5.27966	5.47092	4.62881	4.2687	4.25644
C9orf41	-0.995767	0.000122058	0.017462	7.16976	7.51074	7.35748	6.26533	6.20333	6.58202
MFAP4	-0.993793	9.67821e-05	0.0156329	5.96712	6.2947	5.99026	4.97277	5.02778	5.27015
ITGAV	-0.992787	9.35227e-05	0.0156329	7.97365	8.01947	8.13021	6.83258	7.27909	7.0333
TCF4	-0.988027	0.000302226	0.0261098	6.83726	7.41401	7.25832	6.02306	6.36534	6.15711
ARHGAP26	-0.985257	0.000710366	0.0410193	5.83996	6.30213	6.52861	4.96886	5.3114	5.43467
NCF2	-0.979307	0.000793371	0.0435008	5.08138	5.46128	5.82254	4.5449	4.65653	4.22585
VSTM1	-0.977257	0.000227442	0.0221353	5.39831	5.61529	5.03825	4.48448	4.2749	4.3607
CLEC5A	-0.975727	0.000449957	0.0322056	5.71528	6.12967	6.00568	4.6484	5.01644	5.25861
LRIG1	-0.968843	4.02495e-05	0.0108586	5.73234	5.8403	5.7486	4.84983	4.68291	4.88197
UCP2	-0.96557	0.00017383	0.0195097	8.37504	8.52307	8.55182	7.53642	7.25004	7.76676
TNFRSF1B	-0.95918	0.000227795	0.0221353	5.9586	6.49332	6.32307	5.37368	5.35711	5.16666
ATP2B4	-0.95247	0.000637413	0.0385276	7.16943	7.66511	7.15767	6.17747	6.6745	6.28283
MMP2	-0.95127	0.000552421	0.0362807	5.74616	6.22894	6.16473	4.81029	5.13173	5.344
VSIG4	-0.95002	0.00022963	0.0221353	4.79877	5.04345	4.8348	4.01485	4.15659	3.65552
DUSP16	-0.944267	0.000404451	0.0311738	6.37035	5.69679	6.04603	5.12548	5.11207	5.04282
RAB39A	-0.943787	0.000236878	0.0226513	3.10468	3.66796	3.38116	2.37503	2.45154	2.49587
MAN1A1	-0.935217	5.24101e-05	0.0117469	9.20148	9.03451	9.02289	8.21151	8.15279	8.08893
GDAP1	-0.931283	5.81582e-05	0.0126394	7.07279	7.09987	7.03616	6.09512	6.27713	6.04272
LAIR1	-0.920907	0.000164561	0.0195097	7.1459	7.51565	7.14611	6.24031	6.37939	6.42524
TLE4	-0.910763	0.000177711	0.0195097	7.85437	7.5948	7.48818	6.88583	6.61712	6.70211
ANXA6	-0.896307	0.000693443	0.0408311	7.5824	8.14134	7.8356	6.80584	7.2073	6.85728
FAM171A1	-0.895787	0.000402656	0.0311738	6.84748	7.10685	7.31738	6.33104	6.27265	5.98066
MAPK6	-0.88487	0.000129987	0.0180667	7.9427	7.92465	8.20123	7.06067	7.12782	7.22548
NAIP	-0.883591	0.00110328	0.0499197	7.48791	8.14709	7.49759	6.79218	6.74483	6.94481
TIFAB	-0.874477	0.000173531	0.0195097	4.98924	5.30997	5.1413	4.16693	4.25542	4.39473
EPS15	-0.867273	8.61117e-05	0.0151367	9.78879	9.69841	9.81838	8.81852	8.96393	8.92131
SYP	-0.864497	0.000182149	0.0195097	5.03106	4.83721	4.67941	4.06028	3.98988	3.90403
TMEM65	-0.859467	0.000250064	0.0231707	6.95561	6.82708	7.05978	5.93558	6.02933	6.29916
C1orf162	-0.85912	0.000571377	0.0367186	6.70796	7.25356	7.15285	6.07155	6.24328	6.22218
SAMD9L	-0.8578	0.000406853	0.0311738	7.36568	6.92556	7.40265	6.43053	6.34812	6.34184
PLD4	-0.855323	0.000386699	0.0308148	6.18259	6.67673	6.2906	5.57038	5.52013	5.49344
LACC1	-0.852157	0.000385858	0.0308148	5.83024	5.75079	5.84817	4.90335	4.73461	5.23477
TGFBI	-0.847493	0.000369605	0.0304682	5.19272	5.14756	5.30513	4.19836	4.26525	4.63932
THUMPD1	-0.8245	0.000206106	0.0216104	8.19573	8.15112	8.32925	7.38143	7.54495	7.27622
OPN3	-0.821767	0.000241639	0.0228578	6.35897	6.66505	6.52632	5.59106	5.7755	5.71848
LRRC40	-0.8201	0.000764722	0.0427136	5.98838	6.38554	6.43191	5.25217	5.59091	5.50245
CAPN2	-0.81909	0.00021582	0.0218619	7.56275	7.66817	7.69754	6.65985	6.94508	6.86626
CMPK2	-0.817097	0.000807645	0.0436823	6.95901	6.44892	6.68462	6.06617	5.7558	5.81929
CPQ	-0.812263	0.000147503	0.0192162	6.39129	6.41474	6.28316	5.5144	5.63209	5.50591
FBXL4	-0.81179	0.000930684	0.046167	6.90419	7.12164	7.50799	6.31502	6.34037	6.44306
CLEC12A	-0.81164	0.000254723	0.0234208	7.00538	6.99073	6.93939	6.17619	6.3335	5.99089
PIK3CB	-0.808057	0.000445838	0.0322056	10.1398	9.78378	10.0858	9.18382	9.06794	9.33345
YBX3	-0.805173	0.000213896	0.0218546	9.06494	9.04711	9.0259	8.24337	8.09562	8.38344
GYPC	-0.80441	0.000413078	0.0312502	7.52244	7.66335	7.67773	6.58304	6.96258	6.90467
PLCL2	-0.80079	0.000909042	0.0457761	5.94807	5.96043	5.8377	4.94294	5.45311	4.94778
HLA-DPB1	-0.795839	0.000801883	0.0435678	8.38744	8.21274	8.71083	7.70722	7.72259	7.49367
SLC17A7	-0.792243	0.00070627	0.0409808	5.39399	5.48233	5.6304	4.43549	4.82939	4.86511
XYLT1	-0.790823	0.000399009	0.0311738	6.84172	6.87274	7.00199	6.04197	5.97667	6.32534
NKAIN2	-0.783833	0.000981106	0.0473818	5.54448	6.05285	5.66961	5.02007	5.06596	4.82941
CYTL1	-0.7697	0.000703636	0.0409808	7.17505	7.32633	7.36692	6.2963	6.74085	6.52205
TAS2R60	-0.769487	0.000878303	0.0451659	3.64913	4.13692	3.98861	3.08444	3.11778	3.26398
ENTHD1	-0.767213	0.000588784	0.0368468	4.13914	3.7483	3.96575	3.2657	3.22047	3.06538
ZNF117	-0.755073	0.000449249	0.0322056	7.89897	7.60527	7.78948	6.89959	7.08411	7.0448
MLLT3	-0.72097	0.000613419	0.037601	8.62848	8.53894	8.81727	7.89129	7.87462	8.05587
UBE2Q2	-0.71405	0.000643908	0.0386068	7.54001	7.29916	7.40116	6.83826	6.64401	6.61591
LIN7A	-0.71323	0.000742473	0.0424631	4.65621	4.67436	4.49178	4.06592	3.86381	3.75293
TLR4	-0.708627	0.000415764	0.0312555	5.11968	5.11228	5.23865	4.5235	4.40406	4.41717
PLEC	-0.707663	0.000791005	0.0435008	6.62164	6.35258	6.35552	5.68609	5.85996	5.6607
CTSO	-0.70618	0.000870876	0.0451659	4.75378	4.72356	5.07589	4.1815	4.10882	4.14437
P2RY2	-0.702003	0.00104588	0.0493485	5.84259	5.98573	6.03666	5.03888	5.40346	5.31663
HCK	-0.699483	0.00104112	0.0493485	6.02585	6.33372	6.18022	5.32023	5.60474	5.51637
LRRK1	-0.697667	0.0010784	0.0495773	5.44419	5.72204	5.7019	4.78809	4.90586	5.08118
NKG7	-0.67981	0.000587183	0.0368468	6.67371	6.69966	6.56724	6.04423	5.96567	5.89128
PRAM1	-0.669253	0.000869828	0.0451659	6.82186	7.07863	7.02616	6.30627	6.24501	6.36761
STYK1	-0.663107	0.00105612	0.0493485	3.68582	3.61252	3.46109	3.05222	2.90645	2.81144
EMILIN2	-0.658117	0.0011109	0.0499197	6.83647	7.05948	7.08072	6.29016	6.44549	6.26667
CABP5	-0.608583	0.00105882	0.0493485	5.2279	5.18778	5.23236	4.5511	4.64526	4.62593
70 genes downregulated upon knockdown of Tr.2
Gene Name	log2FC	P-value	adj. P-value	Tr.2_1	Tr.2_2	Tr.2_3	Scramble_1	Scramble_2	Scramble_3
CATSPERB	1.95226	1.15629e-06	0.00276422	3.05176	3.08964	3.38819	4.87656	5.48104	5.02878
KCNT2	1.95133	4.27032e-06	0.00340288	4.5285	3.92376	4.56331	6.56776	5.96938	6.33243
RBPMS2	1.92319	1.24751e-05	0.00745573	6.3071	5.94029	5.75637	8.41006	7.46232	7.90094
CLCN4	1.89516	2.02284e-07	0.00120895	7.6561	7.77683	7.50595	9.68445	9.55065	9.38927
SLAMF6	1.82417	0.000469846	0.0330357	5.40641	4.19402	5.66576	7.39908	6.5006	6.83903
B3GALT2	1.72339	0.000847076	0.0450004	4.79167	4.15749	3.86048	6.90769	5.66723	5.40489
SIGLEC17P	1.65805	0.000489995	0.0332779	4.22088	3.71459	4.23643	6.47807	4.9572	5.71079
PRKG1	1.657	1.31692e-05	0.0074958	6.80446	6.20243	6.29175	8.40897	8.04873	7.81193
EGFL6	1.46025	3.45522e-05	0.0105628	5.67887	5.03775	5.00889	6.50218	6.91871	6.68538
EFCAB13	1.43955	9.26331e-05	0.0156329	6.84567	6.24455	6.93914	8.50194	7.8382	8.00786
SV2A	1.4115	2.75577e-06	0.00328466	5.96704	6.22223	5.87973	7.41125	7.51117	7.38108
GRIK4	1.4111	0.000496148	0.0333171	5.775	4.79387	5.22064	7.19883	6.39059	6.43338
CD274	1.36427	0.000566862	0.0367186	5.43244	6.19612	5.86892	6.82679	7.80787	6.95564
RMND5A	1.35508	3.52536e-06	0.00328466	6.25528	6.27962	6.04571	7.69036	7.46063	7.49485
VWA5A	1.34018	3.69411e-05	0.0107697	7.53222	7.05763	7.05206	8.8063	8.56105	8.29509
MBOAT2	1.32279	1.70067e-05	0.00813123	7.48497	7.02193	7.03244	8.40785	8.66734	8.43253
ZNF252P	1.32172	3.35384e-05	0.0105628	4.2182	4.74056	4.78596	5.72108	6.05352	5.93527
MS4A2	1.31466	0.000775857	0.043134	6.19625	5.80855	5.91958	8.01819	6.92786	6.92232
ST6GAL2	1.30726	0.00058413	0.0368468	5.4341	4.5192	4.64367	6.5443	5.78794	6.18651
CPA3	1.30544	0.000122715	0.017462	9.14285	8.76742	9.33367	10.8007	10.1222	10.2374
FAM162A	1.29317	0.000361197	0.0301915	6.16061	6.91037	6.22398	7.5328	8.16144	7.48023
CTSW	1.26023	6.44992e-05	0.0135256	7.08829	7.40456	7.82344	8.62562	8.6703	8.80107
SLC1A1	1.25776	0.000272204	0.0241941	3.99258	4.03634	3.81962	5.68723	5.24349	4.69111
SPX	1.25546	0.000150367	0.0193262	8.01147	7.33026	7.75046	9.2302	8.98683	8.64155
MED12L	1.20604	8.00919e-05	0.0149584	9.34905	8.73739	8.85578	10.3756	10.1459	10.0388
TMEM45A	1.19858	0.000403221	0.0311738	6.49568	6.5224	6.42374	7.50728	8.25531	7.27498
CYB5A	1.17057	1.39409e-05	0.00757435	5.3412	5.22889	5.44469	6.3343	6.57631	6.61587
CMAS	1.16683	1.21354e-05	0.00745573	7.96868	7.77328	7.80732	8.87461	9.03577	9.13938
NAP1L3	1.15571	0.000759057	0.0427136	4.26669	4.86704	4.7828	5.27773	6.07443	6.0315
COX5A	1.14768	0.00021392	0.0218546	7.26577	7.82428	7.80782	8.47051	8.8732	8.99719
TAP1	1.12195	1.21357e-05	0.00745573	6.15539	6.15873	6.26594	7.30626	7.43263	7.20703
DCBLD2	1.10263	7.86618e-05	0.0149584	7.65665	7.94524	7.99893	8.69551	9.09202	9.12118
DOK6	1.08797	0.000556737	0.0363644	5.93856	5.69423	5.51823	7.11666	6.97728	6.32098
TXK	1.08008	7.3715e-05	0.0144445	6.25408	6.4935	6.50854	7.72297	7.52848	7.2449
JUP	1.07244	1.91359e-05	0.00819927	7.36349	7.32236	7.29402	8.46301	8.48813	8.24604
CD151	1.06144	0.000303628	0.0261098	7.30288	6.75589	7.06975	8.43142	7.89788	7.98354
GP5	1.06026	0.000311091	0.0263721	7.92575	7.3203	7.63005	8.98441	8.54151	8.53097
NXPE3	1.05126	0.00106646	0.0494083	5.05448	5.6063	5.86479	6.32629	6.44123	6.91182
PRR5L	1.04543	0.000115314	0.0171805	5.83514	5.90148	6.00853	7.07846	7.16548	6.63749
ITGB1BP2	1.04221	6.91808e-05	0.0140156	3.62009	4.09555	3.83139	4.89195	4.9551	4.82661
VBP1	1.02327	0.000386333	0.0308148	6.13713	6.44407	6.7271	7.17637	7.68789	7.51386
ZNF25	1.01372	7.90028e-05	0.0149584	6.703	6.53362	6.67665	7.89706	7.58344	7.47393
C6orf223	0.992557	9.67768e-05	0.0156329	6.24235	6.08698	6.53926	7.34482	7.29788	7.20356
AACS	0.986547	2.98704e-05	0.0103507	6.78048	6.63796	6.67393	7.65355	7.6383	7.76016
ATG4A	0.982383	4.14676e-05	0.0108586	6.08009	5.81003	5.88182	6.89988	6.92813	6.89108
ADAM9	0.980967	0.000128396	0.0180556	6.40907	6.4789	6.56803	7.2627	7.39619	7.74001
TIMM8A	0.96612	4.82744e-05	0.0115405	6.60498	6.68197	6.67008	7.65396	7.73386	7.46757
GJA5	0.960697	0.000186999	0.0197805	3.66974	3.58235	3.29933	4.4533	4.68966	4.29055
RNASEL	0.957107	0.000218812	0.0219786	5.6421	5.30817	5.26946	6.60207	6.25363	6.23535
RPS6KA5	0.938807	0.000629785	0.0384072	5.55082	5.98335	5.93772	7.10346	6.591	6.59385
INSIG2	0.90837	0.00018161	0.0195097	7.07262	7.2471	6.99123	7.97624	8.22053	7.83929
SLC7A1	0.901303	0.000842454	0.0449547	7.55351	7.24016	7.31286	8.54923	7.88966	8.37155
TTC27	0.888753	0.000577917	0.0367438	8.25466	8.34102	8.34923	8.87418	9.52741	9.20958
TJP1	0.884013	0.000136534	0.0183369	4.26101	4.18523	4.2757	5.07498	4.98133	5.31767
PDGFD	0.881617	0.000887977	0.0451659	3.34512	3.70077	3.64453	4.09402	4.70114	4.54011
IL7	0.879343	0.000147904	0.0192162	5.52913	5.3337	5.55892	6.19772	6.40048	6.46158
ZFYVE21	0.875053	0.000273109	0.0241941	6.34834	5.96809	6.38934	7.18337	7.02776	7.1198
FZD6	0.868833	0.000940117	0.0464348	5.67609	6.0281	5.81195	6.41799	7.04631	6.65834
ABHD5	0.86683	0.000166679	0.0195097	6.42475	6.65959	6.58207	7.27635	7.55858	7.43197
FHL1	0.86489	0.000911462	0.0457761	6.8383	6.5064	6.71018	7.8853	7.50451	7.25974
GFPT1	0.851593	0.000748856	0.0426242	8.18973	8.14201	8.51008	9.02267	8.94803	9.4259
UBE2W	0.677713	0.00085913	0.0451659	8.01759	7.90123	7.96132	8.7984	8.60984	8.50504
TOM1L1	0.673957	0.00107472	0.0495773	5.6093	5.64619	5.75852	6.15555	6.41156	6.46877
RAB38	0.673243	0.000538273	0.0355468	7.89544	7.88677	7.89373	8.49858	8.63705	8.56004
KPNA1	0.651873	0.000739635	0.0424631	7.06334	7.15444	7.16507	7.76185	7.72046	7.85616
VPS25	0.647727	0.000852737	0.0451007	7.4517	7.63881	7.58598	8.26244	8.18857	8.16866
GRB2	0.647387	0.00105651	0.0493485	8.12199	7.92145	8.0544	8.7955	8.62975	8.61475
FNTB	0.64732	0.00110844	0.0499197	6.19092	6.46351	6.37939	6.94064	7.05025	6.98489
MFN1	0.645087	0.000759508	0.0427136	5.94279	6.0111	5.99458	6.5538	6.69182	6.63811
ZMAT2	0.626327	0.000812467	0.0437451	6.80561	6.858	6.82217	7.46108	7.44828	7.4554

## Sheet: (C) KD Tr.4 genes
66 genes upregulated upon knockdown of Tr.4
Gene Name	log2FC	P-value	adj. P-value	Tr.4_1	Tr.4_2	Tr.4_3	Scramble_1	Scramble_2	Scramble_3
PAPPA	-2.40394	3.13425e-08	0.000378711	6.45507	6.3648	6.09524	3.93176	3.9784	3.79312
CCDC173	-2.37701	7.37793e-06	0.00969651	5.73153	6.38385	6.29637	3.24256	4.24489	3.79327
VNN1	-2.35373	6.15629e-06	0.00969651	7.40173	7.63336	7.25409	5.02746	5.65734	4.54319
RUNX1T1	-2.22868	1.53268e-05	0.0108062	5.47104	4.93627	4.24364	2.75803	2.48368	2.7232
ALOX5AP	-1.51643	7.27309e-05	0.0175057	8.12392	8.33782	8.3927	6.80868	7.22252	6.27396
CABP5	-1.46235	6.62268e-05	0.0175057	5.65567	6.567	5.98668	4.5511	4.64526	4.62593
SLC17A7	-1.45225	4.92904e-05	0.0171993	5.82113	6.545	6.12061	4.43549	4.82939	4.86511
KITLG	-1.43463	0.000266948	0.0313229	5.04556	3.95016	4.58049	3.2943	2.94513	3.03289
RCAN1	-1.39104	2.43709e-05	0.0117789	7.26372	7.62507	7.33458	5.74732	6.33399	5.96895
KCNE1	-1.38061	0.00078541	0.0499479	6.65925	6.69152	6.30598	4.80413	5.90067	4.81012
KEL	-1.36531	5.42484e-06	0.00969651	8.24221	7.92281	8.05974	6.63242	6.89945	6.59697
LAMP5	-1.33414	1.47823e-05	0.0108062	5.99008	5.68142	5.86141	4.78316	4.30794	4.43938
DYNLT3	-1.33171	7.13595e-05	0.0175057	6.63495	7.22343	6.97152	5.37458	5.53325	5.92695
MICAL2	-1.32121	8.50544e-05	0.0182275	6.18833	6.12591	6.26731	4.67316	5.34783	4.59694
UCP2	-1.31403	1.15933e-05	0.00969651	8.78779	8.88181	8.8257	7.53642	7.25004	7.76676
RBMS3	-1.26313	0.000386094	0.0373214	4.9156	4.57196	3.8983	3.20448	3.28102	3.11096
MYL9	-1.25173	7.53085e-05	0.0175057	7.94292	8.50152	8.20987	7.25627	6.83003	6.81283
SPTA1	-1.237	0.000351975	0.0360701	8.67365	8.54888	8.78513	6.93485	7.90823	7.45357
IPCEF1	-1.21148	0.00028278	0.0319669	6.85883	7.38317	6.9767	6.21317	5.46296	5.90812
TBL1X	-1.20517	1.77053e-05	0.0108062	8.36428	8.15083	8.08708	6.84566	7.21435	6.92667
CLEC2B	-1.13189	0.000303652	0.0330543	5.78923	5.86696	6.37904	4.65963	5.20234	4.7776
MPPED2	-1.1205	3.68453e-05	0.014974	5.1241	5.15192	4.74008	3.78609	3.99718	3.87133
TMTC3	-1.091	1.20374e-05	0.00969651	6.86063	6.81642	7.00483	5.7124	5.77849	5.91799
LGALS12	-1.06605	0.000126871	0.0218997	8.32177	8.14018	8.07511	7.43554	6.86371	7.03967
MMP1	-1.04472	7.57155e-05	0.0175057	4.71776	4.85946	5.1673	3.89223	3.99321	3.72492
MKL2	-1.03336	0.000115911	0.0216268	6.52617	6.66297	6.63069	5.25139	5.79282	5.67555
TRPS1	-1.02887	5.11015e-05	0.0171993	6.73826	6.71735	6.87358	5.54864	5.96708	5.72687
EIF5A2	-0.988533	0.000261062	0.0312318	5.12755	5.59996	5.75142	4.46017	4.58313	4.47003
PLEKHA7	-0.975533	0.000170716	0.0264456	6.38842	6.90205	6.72141	5.54827	5.76396	5.77305
PIK3CB	-0.972313	4.55736e-05	0.0166868	10.1864	10.2785	10.0373	9.18382	9.06794	9.33345
LOX	-0.971743	0.000618862	0.0463435	6.33928	5.96042	6.74083	5.3386	5.45347	5.33323
PTRF	-0.956537	0.000466113	0.038725	6.93294	7.13657	7.13161	5.80324	6.4794	6.04887
CCRL2	-0.923923	9.32842e-05	0.019045	7.10242	6.73437	6.87362	5.96831	5.89341	6.07692
ARRDC4	-0.88871	0.000309324	0.0330758	7.71673	7.71712	7.88334	7.14468	6.89275	6.61363
CCNY	-0.859617	6.36738e-05	0.0174857	8.55353	8.57188	8.36734	7.61212	7.68208	7.6197
MAPK6	-0.85852	0.000185582	0.0280299	7.76384	8.13181	8.09388	7.06067	7.12782	7.22548
CPQ	-0.84876	7.02378e-05	0.0175057	6.48122	6.42422	6.29324	5.5144	5.63209	5.50591
PYROXD1	-0.843083	0.000401852	0.0379198	6.6501	6.58015	6.90707	5.62914	5.9517	6.02723
TSPAN5	-0.836297	0.0004469	0.0385706	7.61757	7.19393	7.30607	6.7306	6.44869	6.42939
C9orf41	-0.833973	0.000374596	0.0371182	7.00329	7.31785	7.23146	6.26533	6.20333	6.58202
CALU	-0.822427	0.00015247	0.0248959	8.63876	8.32749	8.48811	7.67653	7.58049	7.73006
NDN	-0.810293	0.000238429	0.0303256	5.01411	5.13673	5.39783	4.31559	4.37796	4.42424
PSAP	-0.80238	0.000293662	0.0322574	9.76808	10.1463	9.82543	9.09384	9.1875	9.0513
ICK	-0.7831	0.00012171	0.0216268	5.43001	5.31119	5.32268	4.66796	4.48917	4.55745
EPB42	-0.777537	0.000675917	0.0470482	5.63155	5.86271	5.54516	4.95567	5.08291	4.66823
KPNA3	-0.775717	0.000188269	0.0280511	8.78629	8.79028	8.66821	7.84613	7.95749	8.11401
S100A4	-0.76701	0.000680228	0.0470482	8.9697	8.54021	8.95459	8.15495	8.03653	7.97199
EXTL2	-0.75931	0.000536516	0.0423708	5.87498	6.05073	6.27911	5.24436	5.23913	5.4434
SERPINI1	-0.753967	0.000577945	0.0441982	6.92141	6.7184	6.97857	6.24671	5.89772	6.21205
FAXDC2	-0.744943	0.000706922	0.0475635	9.68382	9.73086	9.49397	9.12699	8.83097	8.71586
HLA-F	-0.74436	0.000210168	0.0285333	8.02215	8.16908	8.21132	7.48329	7.3169	7.36928
SERINC1	-0.743433	0.000359399	0.0364925	9.69989	9.75719	9.57551	9.01433	9.03664	8.75132
C14orf2	-0.743397	0.0006853	0.0470482	7.83339	7.92749	8.29058	7.24921	7.28508	7.28698
STK17B	-0.735073	0.000629035	0.0463435	7.55761	7.86948	7.82684	6.90495	7.1901	6.95366
CA5B	-0.733243	0.000467918	0.038725	6.55017	6.61724	6.49073	5.90358	5.95174	5.60309
HIF1AN	-0.731627	0.000431051	0.0380175	6.9303	7.04794	6.99279	6.3879	6.33621	6.05204
TNNT2	-0.721597	0.000585594	0.0445015	5.76422	5.61689	5.5112	5.03261	4.71966	4.97525
LAT2	-0.70244	0.000267008	0.0313229	8.17963	8.04741	8.14219	7.33369	7.50244	7.42578
EPS15	-0.700463	0.000232421	0.029876	9.56702	9.64991	9.58822	8.81852	8.96393	8.92131
PTPN11	-0.69604	0.000382151	0.0373159	9.1509	9.37281	9.40027	8.59787	8.65809	8.5799
ATP6V1A	-0.677773	0.000382949	0.0373159	10.0252	10.0858	9.9273	9.40474	9.36841	9.23187
TCP11L1	-0.66381	0.000374776	0.0371182	5.62872	5.61256	5.63457	5.07324	4.9236	4.88758
YWHAB	-0.645107	0.000681747	0.0470482	9.70043	9.80443	9.76791	9.00513	9.0644	9.26792
C12orf57	-0.64424	0.000418156	0.0379198	8.86257	8.82591	8.77961	8.09674	8.23377	8.20486
INPP5D	-0.605883	0.00075198	0.0491144	10.0028	9.85668	9.90262	9.26458	9.40285	9.27701
GALNT2	-0.599137	0.000770787	0.0499421	8.64359	8.60616	8.48529	8.01976	8.00164	7.91623
124 genes downregulated upon knockdown of Tr.4
Gene Name	log2FC	P-value	adj. P-value	Tr.4_1	Tr.4_2	Tr.4_3	Scramble_1	Scramble_2	Scramble_3
B3GALT2	2.74769	5.12436e-05	0.0171993	3.83579	2.83146	3.06948	6.90769	5.66723	5.40489
MS4A2	2.71236	0.000279873	0.0319669	5.74992	3.84742	4.13396	8.01819	6.92786	6.92232
HDC	2.31514	9.07779e-05	0.0189115	6.78383	5.37875	5.84727	8.83227	8.23703	7.88598
C15orf54	2.2045	0.000121596	0.0216268	4.6359	3.64697	3.96653	7.06525	5.7767	6.02095
HPGDS	2.05676	0.000190366	0.0280511	8.86863	7.39704	7.67035	10.3296	10.0615	9.71522
CD44	1.77559	3.366e-06	0.00969651	7.49474	6.93195	7.03953	9.11234	8.94989	8.73076
CPA3	1.7388	0.000210067	0.0285333	9.29286	8.09838	8.55262	10.8007	10.1222	10.2374
EGFL6	1.63771	6.66879e-06	0.00969651	4.79592	5.36815	5.02908	6.50218	6.91871	6.68538
FBXO40	1.63128	5.40709e-05	0.0174857	3.78263	3.99015	4.00262	4.97871	5.77384	5.91669
ACVR2A	1.60778	1.87809e-05	0.0108062	4.86484	5.41995	5.28452	6.98194	6.44211	6.96861
TNFSF10	1.58042	2.31748e-05	0.0117789	5.16192	4.66713	5.28262	6.81826	6.73376	6.3009
ANXA1	1.52333	0.000140107	0.0235126	7.76883	7.14743	7.26928	8.81368	9.414	8.52785
RHOBTB3	1.5117	0.000778618	0.0499421	4.85144	6.12334	6.06709	6.98787	7.25874	7.33036
IL1RAP	1.49196	6.29712e-05	0.0174857	4.42567	5.12491	5.04333	6.04191	6.57077	6.4571
PPP3CA	1.46961	1.18606e-05	0.00969651	7.73131	7.24842	7.27912	9.10572	8.82695	8.73502
GPR155	1.42417	0.000151856	0.0248959	5.01899	5.94766	5.45086	7.13545	6.88266	6.67191
VDR	1.41051	9.5097e-05	0.019045	4.7298	4.96983	5.03033	6.48863	5.81752	6.65533
MACC1	1.40407	1.14943e-05	0.00969651	4.87514	4.4422	4.77488	6.1147	5.89491	6.29481
TMEM9B	1.3995	2.34465e-05	0.0117789	7.1019	6.84707	6.57461	8.51254	8.10568	8.10386
GMFB	1.39629	4.15855e-05	0.016209	5.60036	5.56137	5.86471	6.67886	7.38691	7.14953
TGIF1	1.38292	0.000103985	0.0202654	4.54891	4.79717	5.06193	5.77923	6.55396	6.22358
COBLL1	1.3448	0.000712487	0.0475635	4.27298	3.86153	3.98594	6.06638	4.94427	5.14419
SWAP70	1.3418	0.000118842	0.0216268	5.58089	5.8251	6.06666	6.7191	7.36733	7.41161
CAV2	1.34129	8.59861e-05	0.0182275	6.33773	5.84388	5.54592	7.31957	7.36163	7.0702
VWA5A	1.32826	3.63083e-05	0.014974	7.49959	7.02201	7.15607	8.8063	8.56105	8.29509
ZNF521	1.31873	9.22703e-06	0.00969651	5.14859	4.83016	4.85692	6.39649	6.32934	6.06603
C5orf15	1.315	6.40222e-06	0.00969651	6.65506	6.46262	6.43168	7.73108	8.04244	7.72084
SLC35D1	1.29219	4.60373e-06	0.00969651	6.72345	6.55815	6.65178	8.11529	7.79906	7.89559
LAX1	1.2849	9.61469e-05	0.019045	4.61648	4.11509	4.49381	6.05915	5.54058	5.48035
KLF12	1.27791	1.69719e-05	0.0108062	3.70962	4.09283	3.93838	5.03511	5.12876	5.41069
IFITM1	1.26035	0.000245172	0.0305404	6.5512	7.37914	7.25105	8.12668	8.35686	8.47889
BLOC1S6	1.25123	2.28853e-06	0.00969651	7.76262	7.67256	7.75608	8.95565	9.06316	8.92613
PRKG1	1.24818	5.88151e-05	0.0174857	6.74997	7.05777	6.71734	8.40897	8.04873	7.81193
IL18R1	1.23111	0.000352253	0.0360701	3.73945	3.59469	3.20494	5.22043	4.54385	4.46812
TIMM8A	1.22689	1.19563e-05	0.00969651	6.18796	6.48405	6.5027	7.65396	7.73386	7.46757
GLIPR1	1.20142	0.000518732	0.0413979	6.24984	6.5421	6.00415	7.03203	7.91794	7.45039
GPR65	1.17328	3.3829e-05	0.014974	4.74221	4.42667	4.83015	6.01419	5.66474	5.83995
MYC	1.14517	0.000200479	0.0281148	6.60988	7.2544	7.30442	8.08827	8.22759	8.28835
PROM1	1.14126	0.000670233	0.0470482	4.143	4.22215	4.1173	4.86629	5.18354	5.85639
MPP7	1.12416	6.14519e-05	0.0174857	7.2254	6.98856	6.91776	8.32393	7.8835	8.29678
CATSPERB	1.10203	0.000324024	0.0343437	3.92179	4.33901	3.8195	4.87656	5.48104	5.02878
RPS6KA5	1.09988	0.000105665	0.0202659	5.66925	5.52623	5.79318	7.10346	6.591	6.59385
GSAP	1.09936	6.73583e-05	0.0175057	7.95097	7.85605	7.86662	9.29995	8.74262	8.92915
VEPH1	1.08333	0.000404154	0.0379198	3.01478	3.20296	3.26483	4.09631	4.70357	3.93269
MIR142	1.06883	0.00042228	0.0379198	6.01173	5.22104	5.47607	6.57196	6.7803	6.56308
SIRPA	1.04857	5.8945e-05	0.0174857	5.45592	5.26791	5.02824	6.1787	6.28625	6.43284
CD53	1.04292	3.71778e-05	0.014974	6.19485	5.86254	5.81199	6.99806	6.97465	7.02544
PAPSS2	1.03645	0.000124665	0.0218309	6.6426	7.19156	6.71684	7.85784	7.93886	7.86365
GLCE	1.03232	0.000136068	0.0231564	6.92249	7.26781	6.979	8.36944	7.95916	7.93766
RRP1B	1.01565	4.44284e-05	0.0166868	5.80852	5.80255	5.67936	6.57867	6.96537	6.79335
PLD1	1.01428	2.96467e-05	0.0137777	4.69161	4.76055	5.01359	5.86883	5.81092	5.82883
NKAIN2	0.995647	2.28813e-05	0.0117789	4.0151	3.99071	3.92269	5.02007	5.06596	4.82941
F11R	0.98637	0.000421336	0.0379198	7.52111	7.22041	7.03933	8.5614	8.02204	8.15652
ITGA4	0.977867	0.000120323	0.0216268	6.99923	7.27742	7.37082	8.00554	8.3616	8.21393
MORC1	0.967803	0.000309253	0.0330758	3.26285	3.70635	3.68022	4.26387	4.61018	4.67878
RALB	0.967603	0.000178798	0.027347	8.09716	7.70877	7.94868	8.93947	8.65203	9.06592
ARHGEF6	0.954513	0.000287512	0.0319669	7.19791	7.51563	7.05855	8.087	8.46251	8.08612
ACSL4	0.94928	5.51557e-05	0.0174857	8.08232	8.2759	8.42374	9.15469	9.20583	9.26928
MAP3K1	0.94397	1.85448e-05	0.0108062	6.69882	6.61742	6.65332	7.61279	7.61348	7.5752
PDE3B	0.938633	0.000438617	0.0383399	4.23357	4.04027	4.64177	5.06531	5.30802	5.35818
GAPT	0.93271	0.000254569	0.0310702	7.01781	7.31016	7.53585	8.10274	8.37658	8.18263
TARBP1	0.93109	0.00068101	0.0470482	5.05945	5.65637	5.59632	6.15843	6.51727	6.42971
TRAF5	0.924597	0.000287919	0.0319669	3.58659	3.60081	3.44033	4.74508	4.48439	4.17205
EVI2B	0.918297	0.000217234	0.0288443	7.52276	7.50058	7.72759	8.26511	8.49054	8.75017
SPX	0.91756	0.000561492	0.0432134	8.13932	7.81462	8.15196	9.2302	8.98683	8.64155
DERA	0.916253	0.00055939	0.0432134	4.77996	5.26729	5.21511	5.75107	6.1913	6.06875
ANKRD26	0.904667	0.000202257	0.0281148	3.54169	3.84081	3.82987	4.42093	4.78731	4.71813
ANKRD28	0.899023	0.000199779	0.0281148	7.39011	7.14932	7.03722	8.28424	8.05597	7.93351
PIK3C2B	0.883197	0.00027875	0.0319669	4.90768	4.72022	4.66863	5.90762	5.60201	5.43649
TCEA1	0.878938	6.01517e-05	0.0174857	7.58238	7.36367	7.45316	8.2654	8.40905	8.36157
AFF2	0.87755	0.000200616	0.0281148	6.08229	5.61547	5.81514	6.70124	6.67665	6.76766
PAQR5	0.874	7.92462e-05	0.0176355	4.07937	4.11184	3.91772	4.96378	4.98906	4.77809
TNFSF13B	0.873973	0.000424967	0.0379198	5.86501	6.40159	6.32235	6.98658	7.1285	7.09579
ARL5B	0.86161	0.000165352	0.0262888	7.48973	7.17149	7.2021	8.22539	8.01427	8.20849
LITAF	0.856443	0.000339673	0.0353816	5.99662	6.17833	6.18805	6.87146	7.25796	6.80291
SERPINB9	0.855357	0.000776563	0.0499421	8.12683	8.04014	7.91721	9.23702	8.8037	8.60953
NME8	0.853223	0.000330561	0.0347319	3.15739	2.68493	3.03088	3.88611	3.7003	3.84646
SORL1	0.848403	0.000712042	0.0475635	5.28968	5.40001	5.22332	5.79205	6.35362	6.31255
YES1	0.848063	0.00039124	0.0375187	7.27776	7.70419	7.49147	8.16383	8.34616	8.50762
CD151	0.846437	0.000632167	0.0463435	7.40514	7.19249	7.1759	8.43142	7.89788	7.98354
APMAP	0.84	0.000425014	0.0379198	7.25976	6.98934	6.81492	8.03053	7.84014	7.71335
TMEM63B	0.839657	0.000633383	0.0463435	6.07137	5.74034	5.69596	6.9339	6.48812	6.60462
SLC30A9	0.831223	0.000691543	0.0472086	7.30844	7.73179	7.6181	8.17422	8.61336	8.36442
SLC26A2	0.829173	0.000251622	0.0310239	4.40596	4.71347	4.65786	5.25363	5.54573	5.46545
CDYL2	0.82837	7.67859e-05	0.0175057	5.31815	5.39737	5.23792	6.12197	6.08881	6.22777
NABP1	0.825737	0.000288371	0.0319669	6.41476	6.34466	6.22379	7.36232	7.15722	6.94088
SECISBP2	0.823053	0.000155406	0.025037	7.62818	7.30403	7.45025	8.3603	8.25181	8.23951
PLA2G12A	0.82292	8.02741e-05	0.0176355	7.29457	7.45942	7.40018	8.28155	8.15116	8.19022
PGD	0.816047	0.000227177	0.0295956	8.81866	8.86214	9.0592	9.54677	9.81213	9.82924
ABCC1	0.811677	0.000520772	0.0413979	7.92809	7.57544	7.47874	8.61483	8.45364	8.34883
CLEC12A	0.804637	0.000477134	0.0392191	5.56225	5.34985	5.17457	6.17619	6.3335	5.99089
LOC283588	0.801467	0.000202432	0.0281148	3.68688	3.60443	3.44879	4.4738	4.44459	4.22611
TPM3P9	0.79305	7.58715e-05	0.0175057	8.99837	8.96728	8.90832	9.78172	9.74174	9.72966
ZNF711	0.79252	0.00021696	0.0288443	6.09578	5.92712	6.06193	6.88981	6.93104	6.64154
LPCAT2	0.78606	0.000683235	0.0470482	6.92177	7.16772	7.17829	7.68218	8.13662	7.80716
FAT4	0.776917	0.000751396	0.0491144	4.50083	4.75582	4.95903	5.49923	5.36874	5.67846
NUFIP2	0.759593	0.000169254	0.0264456	7.88849	7.68532	7.81779	8.50634	8.53042	8.63362
APH1A	0.75157	0.00022779	0.0295956	6.01668	6.29278	6.10209	6.89289	6.92676	6.84661
TCTEX1D1	0.749393	0.000441053	0.0383399	5.24472	5.47502	5.21426	6.15068	6.14554	5.88596
VAT1	0.747507	0.000724596	0.0478431	6.91184	6.78383	6.72516	7.82212	7.42008	7.42115
DPP4	0.729957	0.000499812	0.0405317	3.15502	3.01036	3.03843	3.59335	3.8393	3.96103
FAM102A	0.72967	0.000258444	0.0312278	5.19881	5.01732	5.20904	5.96439	5.85225	5.79754
VMA21	0.72742	0.000722946	0.0478431	6.04673	6.06334	6.39934	6.75558	6.96578	6.97031
UHMK1	0.727233	0.000244058	0.0305404	8.19293	8.32921	8.1426	8.89297	9.04601	8.90746
KIAA1147	0.718127	0.000463609	0.038725	4.95205	4.99713	5.17882	5.59909	5.84881	5.83448
NIPSNAP3B	0.701097	0.000371801	0.0371182	4.79124	4.85261	4.83825	5.50323	5.68116	5.401
MPP5	0.697923	0.000455961	0.038725	5.85752	5.93888	5.84632	6.40451	6.70184	6.63014
FAM171A2	0.69587	0.000455769	0.038725	4.30986	4.40729	4.28928	5.0928	5.1389	4.86234
PLXND1	0.695327	0.000704748	0.0475635	5.60067	5.81536	5.71313	6.22303	6.56519	6.42692
MT1X	0.68631	0.000417138	0.0379198	4.6478	4.8945	4.68709	5.43086	5.37971	5.47775
SCARB1	0.684093	0.000542444	0.0425607	5.86794	5.80379	6.03588	6.54911	6.4945	6.71628
UXS1	0.663137	0.000650655	0.0467968	7.93664	7.62256	7.79944	8.49667	8.43412	8.41726
SSH2	0.6457	0.000426805	0.0379198	6.51478	6.61358	6.46606	7.23254	7.14848	7.1505
SPCS3	0.64529	0.000420929	0.0379198	7.70835	7.84364	7.81217	8.48384	8.38531	8.43088
ZNF721	0.644203	0.000462835	0.038725	7.00816	6.92696	6.90224	7.50225	7.60371	7.66401
RINT1	0.642997	0.000672694	0.0470482	5.45592	5.52615	5.60663	6.03182	6.25173	6.23414
CYSLTR1	0.637267	0.000498859	0.0405317	4.61775	4.61288	4.48587	5.21341	5.27154	5.14335
KLHDC10	0.637239	0.000650568	0.0467968	6.04639	5.84729	5.95496	6.68711	6.52585	6.5474
PRRC2C	0.629803	0.000504396	0.0406308	9.00089	8.89177	8.84349	9.50218	9.55884	9.56454
ERMP1	0.628013	0.000556011	0.0432134	6.3508	6.32522	6.41473	6.89017	7.04823	7.03639
PIGN	0.623013	0.000604886	0.0456803	8.04151	8.20205	8.12726	8.82171	8.70523	8.71292
MYL12B	0.618097	0.000781185	0.0499421	9.54565	9.3946	9.5287	10.2038	10.1143	10.0051
SESN3	0.612653	0.000624577	0.0463435	6.16207	6.20692	6.25599	6.77118	6.91073	6.78103
IREB2	0.59406	0.000636682	0.0463435	8.45046	8.53715	8.50983	9.10599	9.1153	9.05833

## Sheet: (D) OE Tr.2 genes
185 genes upregulated upon overexpression of Tr.2
Gene Name	log2FC	P-value	adj. P-value	Tr.2_1	Tr.2_2	Tr.2_3	Empty_1	Empty_2	Empty_3
PBK	1.70326	0.000697233	0.0392297	6.10832	6.4346	5.89445	4.15009	6.06818	3.10932
FCGR2A	1.37287	2.4e-05	0.0104057	10.6507	10.6475	10.9097	9.18721	9.87891	9.0232
CDC6	1.26797	2.17e-05	0.0104057	6.19132	6.52071	5.65443	4.42342	5.7436	4.39552
RAB3C	1.24706	6.95e-05	0.0154711	8.49409	8.26264	7.83048	7.46081	7.47234	5.9129
CD96	1.2298	0.000817729	0.042137	9.54798	8.88195	9.67894	8.83923	8.14529	7.43495
TSPAN13	1.19077	5.49e-06	0.00609621	7.43891	7.3858	7.28323	6.40263	6.42534	5.70765
DEPDC1	1.17008	0.0011747	0.0485883	6.87554	7.11293	6.47351	5.3637	6.94465	4.64339
RRM2	1.16825	0.000164178	0.0242997	8.12401	8.31508	7.7776	6.73592	7.85768	6.11834
GYPA	1.15403	0.000655603	0.0384613	7.11928	5.33912	8.64198	5.06548	4.53542	8.03739
ESCO2	1.1336	0.000663639	0.0385335	7.5504	7.76006	6.94184	6.10884	7.50339	5.23925
TEX9	1.09731	1.94e-05	0.0102078	5.0174	4.73148	4.92491	3.50868	3.98166	3.8915
MAP1B	1.0923	5.99e-05	0.0141932	6.14103	6.10848	6.4736	5.37316	5.24173	4.83132
LRRC39	1.0854	0.000625852	0.0377402	5.60597	6.61593	6.62925	4.99081	5.89367	4.71047
DHFR	1.08176	0.000567151	0.0371007	8.05816	8.24158	7.71375	6.65661	7.97177	6.13982
OSBP2	1.08133	6.61e-06	0.00622405	7.25697	7.02839	7.73498	6.13229	5.68724	6.95682
DTL	1.07921	0.000308998	0.0300462	7.37948	7.57373	6.74472	5.77042	7.19833	5.49155
DIAPH3	1.06155	0.000383328	0.0312357	5.53838	5.73884	5.21824	3.97535	5.40595	3.92949
TYMS	1.06137	0.000941221	0.0439023	9.29473	9.37179	8.67979	7.6725	9.17102	7.31868
TJP1	1.04583	7.5e-06	0.00651034	6.46662	5.99563	7.05525	5.64293	5.02974	5.70732
CCNA2	1.04352	0.00103739	0.0463551	8.83897	9.00704	8.44124	7.53873	8.81263	6.80532
C12orf75	1.0295	3.47e-06	0.00570333	8.02691	8.14762	8.20985	6.83302	7.32856	7.13429
HBE1	1.02401	0.000193341	0.025588	7.11845	6.11188	6.79747	5.86755	5.70825	5.37997
NEO1	1.00863	1.2e-05	0.00826126	6.59111	6.29817	7.49046	5.75249	5.44878	6.15256
DHFR	1.0075	0.000952567	0.0441888	7.74273	7.89039	7.39041	6.48611	7.68561	5.82931
PIM1	1.00686	1.45e-06	0.0041256	9.29312	9.32739	9.67291	8.22499	8.35337	8.69447
GRAMD3	1.00506	0.000704422	0.0394121	6.41684	5.36723	6.17883	5.17683	5.11985	4.65104
NCAPH	0.994788	0.000661809	0.0385335	6.78273	7.05754	6.165	5.26405	6.79795	4.95891
HYOU1	0.982433	0.000221741	0.0274234	8.44563	8.84472	8.45317	7.62229	8.2906	6.88331
CDC20	0.981421	0.00045983	0.0330404	8.54667	8.46404	7.66994	7.25009	8.17739	6.30891
CFAP161	0.979234	8.6e-06	0.00686725	6.66677	6.27659	6.29784	5.91046	5.3209	5.07213
PLK1	0.975536	0.00114977	0.0485163	9.74728	9.71373	8.93532	8.45716	9.54877	7.4638
NCAPG2	0.965406	0.000762078	0.0406998	7.3421	7.67112	7.03423	5.99065	7.4533	5.70728
UBE2T	0.963986	0.000739397	0.0403517	7.67599	7.91337	7.50271	6.54616	7.65877	5.99519
CTPS1	0.957092	2.02e-05	0.010368	6.79978	7.21634	6.62578	5.7322	6.59133	5.4471
NCAPG	0.953474	0.00100774	0.0457466	7.75874	7.94005	7.36821	6.645	7.72352	5.83806
VEPH1	0.951781	2.72e-06	0.00543174	4.51051	5.6438	5.47717	3.5538	4.77813	4.44419
SEC11C	0.949411	0.000692227	0.0392297	6.67128	6.61651	6.48099	5.84892	6.21625	4.85537
CEP55	0.947254	0.000619566	0.0376473	6.62315	6.827	6.33735	5.4755	6.5625	4.90774
FBXO32	0.944322	0.000146345	0.0225206	5.19249	5.73093	6.07477	4.76748	4.44582	4.95193
PDIA4	0.935995	0.000172584	0.0242997	8.28359	8.44513	8.15601	7.05656	8.04688	6.9733
ZFPM2	0.919	0.000103955	0.0198323	7.63425	7.62304	7.60349	7.0005	6.88417	6.21912
GINS1	0.915852	0.0012059	0.049275	6.73788	6.82414	6.43729	5.52591	6.66436	5.06147
MCM8	0.911573	0.000303194	0.0300462	8.0074	8.41701	7.5138	6.7529	8.08169	6.3689
HIST1H2BM	0.904697	0.000334808	0.0308178	11.3804	10.6652	9.50673	10.0339	10.3132	8.49118
APPL2	0.893692	0.000179823	0.0247709	8.07687	8.27509	8.65113	7.38621	7.68014	7.25566
SFXN2	0.892597	0.000305406	0.0300462	6.18055	6.19868	6.33453	5.16436	5.84335	5.02826
VDR	0.883434	2.94e-05	0.0112904	7.6043	7.28127	7.23722	7.00337	6.36827	6.10085
RAB31	0.868254	2.24e-05	0.0104057	7.57063	7.3125	7.86724	6.46847	6.67501	7.00214
ANXA5	0.865821	0.000463438	0.0330597	9.38033	9.69537	9.45768	8.46003	9.36187	8.11402
PIK3R3	0.865772	8.14e-05	0.0172299	6.11041	6.10037	6.65022	5.42746	5.44809	5.38813
ELOVL6	0.865306	0.000803893	0.0419562	8.22275	8.22585	8.21715	7.12293	8.00622	6.94068
SPC25	0.864425	0.00122427	0.0497435	5.25481	5.47534	4.69614	3.90572	5.30174	3.62556
RTN1	0.861516	4.26e-05	0.0126092	6.77127	6.83859	6.81248	5.98213	6.21753	5.63813
BOLA3	0.861122	1.4e-05	0.00900419	7.9023	8.04543	7.60219	6.96426	7.39138	6.61091
SOCS3	0.858151	4.12e-05	0.0126092	6.46674	6.14378	6.37123	5.44406	5.60666	5.35658
KIF23	0.857776	0.000712728	0.0397654	8.3019	8.61411	7.69456	7.23938	8.37517	6.42269
SLC35B4	0.853478	6.51e-05	0.0147725	7.52789	8.2948	8.0876	6.86012	7.61838	6.87135
SLCO2B1	0.853258	6.56e-06	0.00622405	7.39259	7.65651	6.86616	6.62554	6.76897	5.96097
TTLL7	0.850507	8.2e-05	0.0172299	6.83758	7.07367	6.65966	6.10648	6.47905	5.43387
ACCSL	0.846349	3.21e-05	0.0113649	7.45591	7.1889	7.86069	6.8273	6.3918	6.74734
ME1	0.844679	8.24e-06	0.00685866	4.43873	5.75217	4.8427	3.70623	4.82947	3.96386
ATP1B1	0.840846	6.48e-05	0.0147725	7.97425	7.82066	7.3511	7.0269	7.32223	6.27435
SRM	0.838925	0.000485578	0.0342719	8.49721	8.26132	7.69628	7.35152	7.9862	6.60031
LIN28B	0.832567	1.58e-05	0.00954012	4.93356	4.26274	4.92185	3.93882	3.59809	4.08353
AGL	0.823304	0.000411489	0.0318569	6.56001	6.50392	6.63435	5.78998	6.11031	5.32808
FARSB	0.810663	0.000126278	0.0212139	6.8246	7.38413	6.72659	5.77755	6.95991	5.76587
C3orf14	0.809753	3.1e-05	0.0113649	5.44476	5.6109	5.07221	4.65059	5.00303	4.04499
AKR1B1	0.809733	0.00124363	0.0498169	7.45359	7.47011	7.30393	6.59202	7.24908	5.95735
CLSPN	0.809069	0.000436714	0.0326702	6.01176	6.20076	5.57509	4.96154	5.91326	4.48561
PLOD2	0.802898	9.49e-05	0.0187749	8.73408	9.41289	9.24895	7.58197	8.82705	8.57821
PIM2	0.802343	3.81e-05	0.0124842	9.45301	9.20041	9.30213	8.71344	8.1509	8.68419
TMEM2	0.800422	5.25e-05	0.0135059	6.42805	6.72892	6.60907	5.75665	6.08783	5.52029
CENPW	0.798022	0.000743556	0.0403581	6.10934	6.13291	5.84712	5.02581	5.9084	4.7611
MAP7D2	0.796036	0.000275694	0.0288819	5.38448	5.17169	5.53459	5.02883	4.26339	4.41044
MITF	0.795511	3.66e-05	0.0123976	7.4497	7.72764	7.91624	6.55259	7.17606	6.97839
ZWINT	0.794879	0.00101727	0.0458669	7.969	8.04505	7.39376	6.97579	7.84829	6.19909
MYBL2	0.79484	0.000930384	0.0439023	7.7114	7.5415	7.13959	6.34918	7.19376	6.46503
GJA5	0.792751	0.000527031	0.0358751	6.45492	5.78104	6.38956	5.96257	5.21306	5.07164
SLC31A1	0.790908	0.00026791	0.028464	7.804	7.90107	8.08869	6.82511	7.55767	7.03826
PAICS	0.78992	0.000354603	0.0309744	7.75939	8.42184	7.84314	6.51303	7.98623	7.15536
OXCT1	0.788817	0.000839081	0.0422378	8.08413	8.17596	8.03858	7.37294	7.84482	6.71446
PPFIBP1	0.787531	3.16e-05	0.0113649	6.56605	7.1923	6.95909	5.67154	6.62416	6.05914
CDC25A	0.786679	0.000524024	0.0358751	6.27549	6.22389	5.81295	5.01165	5.85475	5.0859
PLS3	0.786333	0.000109857	0.0201311	4.74982	5.05321	5.29971	3.88168	4.60344	4.25862
SPIRE1	0.784144	2.31e-05	0.0104057	6.76438	6.89236	7.51499	5.98439	6.25922	6.5757
MT2A	0.783175	1.38e-05	0.00900419	6.52141	5.96051	5.34726	5.80466	5.20059	4.4744
GCKR	0.782967	0.000104255	0.0198323	4.70866	4.89043	4.95067	4.24615	4.05122	3.90349
MTHFD1	0.781768	0.000232651	0.0276605	7.84337	8.26527	7.7032	6.88702	7.90637	6.67315
GNPNAT1	0.779872	5.44e-05	0.0135059	6.47039	6.79669	6.27397	5.47012	6.26339	5.46792
PCNA	0.779028	0.000659187	0.0384988	8.61982	8.75521	8.09503	7.41617	8.47575	7.24106
ATP6V1B2	0.775386	1.91e-05	0.0102078	10.1832	10.2047	10.4013	9.39748	9.55282	9.51273
FAM3C	0.773577	0.00067129	0.0386408	7.84025	8.15433	8.02114	7.28865	7.69147	6.71486
KBTBD8	0.771446	0.000259828	0.0283752	5.8466	6.09431	6.25907	5.24934	5.57272	5.06359
FAM3C	0.768128	0.000594533	0.0372834	8.06517	8.36843	8.21991	7.4918	7.91587	6.94146
GYPB	0.756393	0.00108354	0.0473579	6.07534	4.83314	5.67873	4.7537	4.44976	5.11458
FANCD2	0.755653	0.00114948	0.0485163	6.79424	6.93758	6.29029	5.692	6.75952	5.30362
SLC16A10	0.755375	0.000593253	0.0372834	7.1039	7.21342	6.64264	6.20573	6.94545	5.54264
LAPTM4B	0.754624	0.000226538	0.0274234	10.4398	10.3757	10.4675	9.61272	9.99282	9.41359
CDHR1	0.750808	1.84e-05	0.010202	7.79133	7.92455	8.36739	6.97016	7.17788	7.68281
HSPA4L	0.74985	0.00010689	0.0199535	5.83511	6.36203	5.96996	5.20611	5.79893	4.91251
TUBG1	0.749003	0.000121572	0.0212139	9.68917	9.56848	9.40786	8.72022	9.13384	8.56444
ATP5G1	0.747663	0.000222919	0.0274234	8.66353	8.82304	8.20491	7.82377	8.44527	7.17945
SLC16A7	0.746219	0.000327721	0.0305883	8.5125	8.55339	8.38751	7.87147	8.11116	7.23212
GPR155	0.743822	5.48e-05	0.0135059	6.53371	7.00894	7.3075	5.641	6.18769	6.79
ANAPC1	0.742044	2.45e-05	0.0104057	6.04314	6.93862	6.24473	5.36317	6.25286	5.38434
SELENOW	0.740002	2.8e-05	0.0111852	7.76626	7.98152	7.86975	6.97828	7.15433	7.26491
HIST1H3B	0.738456	0.000702797	0.0394121	10.8253	10.6473	9.98883	9.84943	10.411	8.98566
CD28	0.738297	0.00107556	0.0471124	7.55877	7.18472	8.17857	7.37395	6.16541	7.16782
ENOX2	0.731497	0.000128701	0.0214222	6.55356	6.79521	6.50408	5.85753	6.31219	5.48864
PGM3	0.728845	7.72e-05	0.0165807	5.51116	6.34279	5.52232	4.78978	5.82732	4.57263
MCM10	0.728715	0.000513135	0.0357121	6.64583	7.12494	6.38019	5.73139	6.84941	5.38402
ACTL6A	0.725097	0.000729728	0.0400428	6.30567	6.60246	6.38902	5.60502	6.29068	5.22616
ALDH7A1	0.723381	0.000312346	0.0300462	6.12011	6.24792	5.33914	5.01152	5.79331	4.73221
NT5DC2	0.718123	0.000631836	0.0377853	7.751	8.34752	7.85018	6.73781	8.09099	6.96552
EXO1	0.715284	0.00102911	0.0460884	6.28747	6.50019	5.80986	5.10766	6.22301	5.121
CCT5	0.714193	0.000108994	0.0201311	8.71963	9.18296	8.74329	8.09706	8.64437	7.76189
LIMA1	0.714071	0.00083692	0.0422378	8.80056	8.81837	8.70946	8.17281	8.48383	7.52954
RUVBL1	0.706968	0.000140467	0.0222674	6.7759	7.35005	6.79049	5.94861	6.93252	5.91441
FHL1	0.706814	4.55e-05	0.0126092	8.16753	8.57396	8.52298	7.4235	7.7558	7.96472
LGALS3BP	0.70284	3.76e-05	0.0124842	8.8763	8.06064	8.40645	8.06902	7.455	7.71085
CDC45	0.69655	0.000828845	0.0422378	6.51247	6.71233	6.07292	5.37077	6.38048	5.45683
ATIC	0.694766	0.000365037	0.0312357	7.35083	7.77982	7.23468	6.46034	7.46509	6.3556
CDK2AP1	0.687418	0.0005243	0.0358751	10.5193	10.4714	10.4793	9.74313	10.1765	9.48814
TTYH3	0.677236	7.48e-05	0.0162358	9.29527	9.29411	9.51071	8.75451	8.6464	8.66748
NDUFAF4	0.673912	0.000292798	0.0299015	5.64985	6.17106	5.84403	5.10463	5.6976	4.84098
VARS	0.669503	8.77e-05	0.0176853	6.98754	7.2106	6.93546	6.22546	6.72746	6.17218
VARS	0.669503	8.77e-05	0.0176853	6.98754	7.2106	6.93546	6.22546	6.72746	6.17218
SLC10A7	0.669427	0.000535383	0.0360732	8.83847	8.95641	8.64058	8.3569	8.49198	7.57831
BLVRA	0.666715	0.00106213	0.0467289	7.92789	8.17705	7.72632	7.04069	7.97858	6.81184
EBNA1BP2	0.665158	0.000562542	0.0370041	6.74822	7.29536	6.83217	6.03081	6.99404	5.85542
PDIA6	0.664205	0.000379089	0.0312357	10.4705	10.7925	10.4407	9.72988	10.4609	9.52019
CFH	0.663594	0.00115102	0.0485163	5.94913	5.68271	5.01872	4.88038	5.43533	4.34406
RFC4	0.662832	0.00123621	0.0498169	7.70293	7.91654	7.31449	6.7154	7.72459	6.50548
ZNF346	0.66259	4.72e-05	0.0127368	6.89862	7.04338	7.03309	6.22649	6.43613	6.32469
RANBP1	0.662527	0.00115202	0.0485163	8.72058	9.00709	8.46489	7.84451	8.81699	7.54349
CCT2	0.6618	0.000400641	0.031382	8.61071	9.0372	8.78921	7.80599	8.72515	7.92058
HSPA5	0.661727	0.000353319	0.0309744	10.3101	10.6434	10.3959	9.65285	10.2719	9.43952
CACHD1	0.658071	0.00012267	0.0212139	4.57866	3.98263	4.00244	3.92811	3.50451	3.15688
DPAGT1	0.656915	0.000130756	0.0214299	7.73989	7.56397	7.03088	6.8646	7.02224	6.47715
ALDH9A1	0.655909	0.00068997	0.0392297	7.26276	7.51755	7.37717	6.67352	7.17462	6.34162
DPP3	0.655366	0.000213938	0.0267075	8.03293	8.06587	7.59322	7.19518	7.67878	6.85196
SUV39H1	0.650985	0.000313292	0.0300462	6.80065	6.64516	6.2041	5.96334	6.30319	5.43042
CHORDC1	0.650591	0.000130892	0.0214299	6.70035	7.00834	6.61604	6.16673	6.44973	5.7565
TUBB	0.650252	0.000850163	0.042347	12.0352	12.1501	11.7264	11.1499	11.9214	10.8896
TUBB	0.650252	0.000850163	0.042347	12.0352	12.1501	11.7264	11.1499	11.9214	10.8896
TUBB	0.650252	0.000850163	0.042347	12.0352	12.1501	11.7264	11.1499	11.9214	10.8896
PIGW	0.647753	8.28e-05	0.0172299	5.99754	6.44168	5.75298	5.39127	5.88993	4.96774
FILIP1L	0.645363	7.14e-05	0.0156734	5.49164	5.96945	5.73351	4.74739	5.33204	5.17909
PPIL1	0.641162	0.000266395	0.0284544	6.97077	7.21297	6.91728	6.2501	6.84444	6.083
PSD3	0.637319	0.000210459	0.0264384	5.33631	4.52359	5.34998	4.69002	4.10543	4.50248
RNU5F-1	0.635754	0.000126387	0.0212139	3.29555	2.48464	4.00634	2.83576	1.72109	3.32243
C3orf52	0.633882	0.000390125	0.0312357	5.83782	6.32892	6.06656	5.48589	5.67389	5.17188
E2F8	0.633435	0.000393952	0.0312357	5.68193	6.28796	5.24215	4.92291	5.96711	4.42171
MFN2	0.633099	0.000177645	0.0246408	8.80992	8.62069	9.159	8.29277	8.09322	8.30432
EXOSC8	0.63254	0.000629782	0.0377755	6.45862	6.79993	6.04695	5.78955	6.5013	5.11703
TNFRSF21	0.632205	0.00104226	0.0464231	5.11572	5.23776	5.42951	4.75375	4.75325	4.37937
COA7	0.632076	0.000610566	0.0376473	6.06331	6.06029	6.09002	5.29566	5.78689	5.23485
LHFP	0.628001	0.000198868	0.0261328	9.40314	9.85544	9.87216	8.97682	9.21877	9.05113
SRD5A3	0.626578	0.000933387	0.0439023	6.1952	6.98611	6.53036	5.26362	6.74135	5.82696
RHAG	0.619527	0.000125882	0.0212139	11.3152	11.0441	11.3421	10.5991	10.5754	10.6683
MRTO4	0.618889	0.000355119	0.0309744	6.43141	6.65656	6.43089	5.65441	6.32068	5.6871
HJURP	0.618736	0.00107	0.0469717	8.19429	8.16538	7.51564	7.273	7.9374	6.8087
ALDH18A1	0.61744	0.00122528	0.0497435	7.24508	7.76848	7.26172	6.29798	7.54713	6.57785
SLC38A5	0.615551	9.78e-05	0.0191559	6.31342	6.2641	6.20771	5.59939	5.69125	5.64793
TRAP1	0.614213	0.00040528	0.0314983	7.63655	7.86839	7.1508	6.85677	7.54583	6.4105
TIMM17A	0.608137	0.000235175	0.0276737	7.04073	7.29713	7.06241	6.34862	6.90623	6.32101
RAN	0.607742	0.000879402	0.0431577	8.27368	8.4846	8.1725	7.45266	8.24831	7.40659
SDF2L1	0.607291	0.000125264	0.0212139	6.35528	6.65624	6.31894	5.75051	6.15741	5.60067
HSPA8	0.607273	0.000172752	0.0242997	11.9281	12.1075	11.8741	11.2969	11.6639	11.127
PI4K2A	0.602158	0.000276181	0.0288819	7.58389	7.75206	7.84108	6.78466	7.14572	7.44017
NUP188	0.600506	0.00117072	0.0485883	6.7834	7.21229	6.76131	5.97374	7.00839	5.97335
MANSC1	0.600395	0.000615824	0.0376473	8.23835	7.44629	7.74422	7.7634	7.04001	6.82426
NHP2	0.599564	0.000476855	0.0337756	6.30776	6.46638	6.07463	5.46155	6.1244	5.46412
CHAMP1	0.599045	0.000135801	0.0216999	7.93943	7.70528	7.62779	7.26915	7.05563	7.15058
UTP20	0.59792	0.000342227	0.0309744	5.16318	5.65322	5.32239	4.4614	5.30402	4.5796
UTP4	0.593909	0.000555812	0.0368111	8.27857	8.50546	7.92365	7.3864	8.09772	7.44182
ANK3	0.593826	0.000122057	0.0212139	5.56932	5.28779	4.68883	5.00671	4.60912	4.14863
POLQ	0.593368	0.000247961	0.0281408	5.04874	5.57973	4.83017	4.28483	5.16608	4.22763
SIGMAR1	0.591297	0.000693559	0.0392297	9.00068	8.7692	8.51663	8.19813	8.4956	7.81888
PLEKHA2	0.59033	0.000191489	0.025588	8.2115	8.35124	8.70317	7.55593	7.92083	8.01816
NDUFA9	0.589616	0.000597311	0.0372834	8.49017	8.13038	7.87667	7.6878	7.83487	7.20569
SLIRP	0.589518	0.00116473	0.0485883	8.47891	8.67465	8.37848	7.88241	8.41902	7.46206
RSAD2	0.588134	0.000310689	0.0300462	6.41274	6.0718	5.95127	5.85311	5.66103	5.15727
TUBB4B	0.58623	0.00110329	0.047675	11.1446	11.0616	10.9367	10.3057	10.8367	10.2418
MTCH2	0.585908	0.000627303	0.0377402	9.155	9.02973	8.54027	8.374	8.74359	7.84969
118 genes downregulated upon overexpression of Tr.2
Gene Name	log2FC	P-value	adj. P-value	Tr.2_1	Tr.2_2	Tr.2_3	Empty_1	Empty_2	Empty_3
SORL1	-1.4551	2.54e-06	0.00543174	4.72102	5.1586	5.24906	5.73986	6.99423	6.7599
TARP	-1.42883	1.1e-07	0.000916577	4.93775	5.33581	4.96422	6.45453	6.61314	6.45659
TARP	-1.42883	1.1e-07	0.000916577	4.93775	5.33581	4.96422	6.45453	6.61314	6.45659
S100A8	-1.40401	1.38e-07	0.000916577	5.50277	5.92466	6.3578	6.74659	7.39355	7.85711
CLC	-1.31586	1.41e-06	0.0041256	3.67292	5.01313	4.18784	4.65033	6.46863	5.70249
MS4A3	-1.31324	6.08e-07	0.00303504	6.24179	6.76787	7.24644	7.43015	8.33992	8.42574
GLIPR1	-1.17879	2.61e-05	0.0106366	6.15953	6.85497	6.56532	7.05605	8.56345	7.49667
PLAC8	-1.16747	1.19e-06	0.0041256	7.31549	7.80642	7.50504	8.4107	9.19269	8.52594
SNORA38B	-1.1626	0.000231039	0.0276605	7.67044	9.69028	10.2775	9.59753	10.5223	11.0062
ADAM28	-1.14759	2.14e-06	0.00533451	3.79686	4.13712	3.96768	4.68205	5.37116	5.29123
CSF3R	-1.14514	4.02e-06	0.00570333	5.7993	6.18922	5.97618	6.6358	7.58172	7.18259
SNORA5A	-1.13309	6.07e-06	0.00622405	5.2452	6.35509	6.66923	6.72879	7.2532	7.68679
ICAM3	-1.11679	3.02e-06	0.00548675	5.64821	5.9644	6.05464	6.48638	7.22424	7.30699
CLEC5A	-1.1153	4.85e-06	0.00570333	3.93094	4.31267	4.76604	4.87019	5.75082	5.73454
SERPINB10	-1.06806	4.28e-05	0.0126092	4.79509	5.08585	5.97443	5.9734	6.52076	6.56537
MIR142	-1.05903	1.62e-05	0.00954012	6.2673	6.2292	6.46471	7.49443	6.89241	7.75144
ECRP	-1.04462	4.45e-05	0.0126092	6.77093	6.10119	6.52892	8.20105	7.20887	7.125
BPI	-1.03296	4.85e-06	0.00570333	6.52779	6.88281	6.72825	7.43246	8.17542	7.62986
VLDLR	-1.03146	4.3e-05	0.0126092	4.59965	4.7955	5.07732	6.03882	5.41731	6.11072
CXCL8	-1.02812	0.000225459	0.0274234	8.96749	7.20682	7.02183	9.42057	8.26096	8.59898
RNASE2	-1.01996	0.00011792	0.0212139	7.82419	7.81385	8.21008	9.07469	9.16849	8.66482
PROM1	-1.01867	1.72e-05	0.009793	3.51716	3.66006	3.40142	4.16699	4.90398	4.56367
CD53	-0.993704	6.86e-06	0.00622405	5.20161	6.02366	5.2539	5.93795	7.10587	6.41647
ELANE	-0.984874	4.34e-06	0.00570333	9.19221	9.36232	9.15781	10.1414	10.5392	9.98635
EVI2B	-0.984481	9.09e-06	0.00698565	6.87485	7.53656	7.01528	7.64334	8.78634	7.95045
MPO	-0.972458	4.82e-06	0.00570333	9.80283	10.1021	9.92997	10.5888	11.2394	10.9241
RNASE3	-0.970729	0.000572916	0.0371007	6.41602	6.45998	6.75589	7.78671	7.74328	7.0141
MFAP4	-0.968535	0.000378699	0.0312357	4.48741	4.53413	4.73538	5.4086	6.09578	5.15814
AZU1	-0.953328	1.54e-05	0.00954012	7.61288	7.37901	7.44767	8.36763	8.63534	8.29659
SCARNA9	-0.940824	0.000176087	0.0245955	7.45139	7.95636	7.69755	8.78209	8.37264	8.77303
NCF2	-0.922343	3.11e-05	0.0113649	4.55938	4.61433	4.90687	5.15969	5.81863	5.86929
ATP8B4	-0.920025	3.24e-05	0.0113649	4.92474	5.47688	4.93138	5.74134	6.74092	5.61081
MIR15A	-0.906072	6.97e-05	0.0154711	4.20532	5.30818	5.59116	5.4928	5.87731	6.45276
ADCY10P1	-0.897654	0.000307798	0.0300462	3.75325	3.51218	3.91986	4.23636	4.95392	4.68797
HLA-DPB1	-0.881773	0.00012196	0.0212139	7.90649	8.41763	7.98475	8.5219	9.11546	9.31683
FLT3	-0.871823	0.000759696	0.0406814	3.954	4.25215	3.93675	4.17648	5.3883	5.1936
HLA-DPB1	-0.86311	0.000279803	0.0291083	7.37664	7.69103	7.39633	7.975	8.294	8.78433
CLEC12A	-0.86306	9.8e-06	0.00725221	5.12515	5.46626	5.56967	6.13835	6.31956	6.29234
MIR126	-0.859993	2.93e-05	0.0112904	3.53648	4.01553	4.05267	4.17109	4.83265	5.18092
CYTL1	-0.859752	2.53e-05	0.0105244	6.10469	6.14621	6.4962	6.70847	7.05269	7.56519
SCARNA17	-0.85507	6.29e-05	0.0146053	6.85039	7.26407	6.87914	8.00512	7.79527	7.75842
CD48	-0.841003	4.11e-05	0.0126092	5.90966	6.24919	5.6335	6.46037	7.31447	6.54052
CECR1	-0.839123	1.08e-05	0.00768769	4.95138	5.06244	5.13889	5.65062	6.0154	6.00404
MEST	-0.832499	0.00014579	0.0225206	7.10695	7.59875	8.38963	7.63532	8.84118	9.11633
HLA-DPB1	-0.820035	0.000387228	0.0312357	7.95623	8.44904	8.00105	8.44476	9.08854	9.33312
ZNF737	-0.819622	0.000208983	0.0264191	4.24262	4.94975	4.88807	5.513	5.56112	5.46518
NAIP	-0.807373	0.000311122	0.0300462	6.46407	5.63232	6.13242	6.90682	6.89536	6.84875
ITGB2	-0.790191	3.39e-05	0.0116713	6.06769	6.17209	6.15197	6.63499	7.12426	7.00307
NAIP	-0.783963	0.000392975	0.0312357	6.36594	5.53226	6.02255	6.76063	6.76058	6.75143
NAIP	-0.783963	0.000392975	0.0312357	6.36594	5.53226	6.02255	6.76063	6.76058	6.75143
IL3RA	-0.777903	2.39e-05	0.0104057	4.89692	5.14913	5.18579	5.50231	6.01358	6.04966
IL3RA	-0.777903	2.39e-05	0.0104057	4.89692	5.14913	5.18579	5.50231	6.01358	6.04966
MGAT4A	-0.771294	2.32e-05	0.0104057	3.63316	3.88539	3.85492	4.25468	4.77883	4.65384
SNORA2A	-0.767778	0.00052805	0.0358751	4.48308	5.0987	5.28549	4.99278	6.36739	5.81043
GPR141	-0.765274	0.000372213	0.0312357	5.16276	5.47453	4.48507	5.47027	6.43952	5.50838
LY86	-0.763588	5.01e-05	0.0132239	3.97019	3.64097	3.9231	4.53326	4.3852	4.90656
CEACAM8	-0.758984	0.000938772	0.0439023	4.41044	5.16879	4.86864	4.96545	6.48126	5.27811
CSF2RB	-0.75774	4.66e-05	0.0127368	8.95025	8.67901	8.56359	9.54136	9.38483	9.53988
SNORD13P2	-0.751492	0.000310381	0.0300462	3.79878	4.52677	4.50194	4.92322	4.91592	5.24282
ZNF90	-0.749155	0.000151115	0.0228665	4.38628	4.26878	4.65083	5.19461	5.28327	5.07548
SNORD12C	-0.74883	0.000885782	0.0431586	4.83556	4.55841	4.82877	6.11104	5.15288	5.20531
NR5A2	-0.743819	5.42e-05	0.0135059	4.38444	4.50997	4.49327	5.35327	5.10551	5.16036
DEPTOR	-0.739835	0.000327023	0.0305883	4.60684	5.49031	4.95342	5.43539	6.53947	5.29522
MYCN	-0.739516	6.04e-05	0.0141932	7.06098	7.32206	7.46251	7.65881	7.96897	8.43631
LYVE1	-0.736689	4.49e-05	0.0126092	7.02477	6.77335	7.239	7.61367	7.47103	8.16249
SLC40A1	-0.734522	9.11e-05	0.0181933	9.93079	10.0869	10.4262	10.5686	10.6462	11.4327
CD300A	-0.731556	0.0001714	0.0242997	7.62239	7.49123	8.13731	8.09367	8.16356	9.18837
HLA-DPA1	-0.731259	0.000170936	0.0242997	7.65298	8.12625	7.79952	8.12826	8.79259	8.85167
HLA-DPA1	-0.731259	0.000170936	0.0242997	7.65298	8.12625	7.79952	8.12826	8.79259	8.85167
SNORA71D	-0.725588	4.46e-05	0.0126092	8.06927	8.33961	8.79212	8.65255	9.23295	9.49227
COL24A1	-0.720046	4.54e-05	0.0126092	6.49968	6.46809	7.05065	7.31125	7.01312	7.85419
SNORD74	-0.716971	0.000202568	0.0262734	7.02292	7.2023	7.11492	8.05344	7.6451	7.79251
MIR223	-0.712735	0.000806357	0.0419562	8.89934	8.98996	9.08458	10.0014	9.2507	9.86002
HLA-DPA1	-0.712078	0.000147989	0.0225643	7.94352	8.39998	8.12912	8.4068	9.08761	9.11444
ADGRE2	-0.710284	0.000201013	0.026242	5.40477	5.52754	5.36356	5.94781	6.07182	6.40709
SCARNA9	-0.710185	0.000236918	0.0276737	7.96432	8.308	8.20391	8.8379	8.66768	9.1012
MYB	-0.705292	0.000247698	0.0281408	6.98235	7.65751	6.94347	7.40871	8.68541	7.60508
SCARNA17	-0.700782	0.000101236	0.019632	5.50875	5.62712	5.10652	6.227	6.10586	6.01188
P2RY13	-0.69866	3.92e-05	0.0126092	3.79419	3.56438	3.80071	4.37998	4.29874	4.57655
PRSS57	-0.697848	0.000205272	0.0262745	6.96921	6.92769	6.85764	7.35586	7.85026	7.64196
TIMP2	-0.695922	5.83e-05	0.0140438	4.40544	4.92612	4.59131	4.98239	5.78949	5.23876
P2RY8	-0.694855	0.000293416	0.0299015	6.16871	6.07154	5.7303	6.52426	7.03063	6.50021
P2RY8	-0.694855	0.000293416	0.0299015	6.16871	6.07154	5.7303	6.52426	7.03063	6.50021
NDRG1	-0.689875	0.000134792	0.0216999	6.71693	6.8738	6.77658	7.22238	7.49031	7.72424
PREX1	-0.684608	5.03e-05	0.0132239	5.29189	5.68924	5.57091	5.86064	6.37919	6.36604
ZNF93	-0.682514	5.84e-05	0.0140438	7.04819	7.07132	6.55563	7.58475	7.79519	7.34274
CD24	-0.675374	0.000260975	0.0283752	2.13076	2.88897	2.69341	3.12643	3.4212	3.19163
C20orf203	-0.673565	0.000637745	0.0380248	4.68692	4.85391	5.20496	5.74732	5.47012	5.54905
CTSZ	-0.669111	0.000245032	0.028128	8.90603	9.05948	9.74245	9.52749	9.4903	10.6975
ITGAL	-0.658696	0.000354097	0.0309744	6.49392	6.44138	6.22712	6.81833	7.26537	7.0548
PRTN3	-0.658446	0.000386412	0.0312357	9.71539	8.92914	9.194	10.0413	9.82878	9.94383
CSTA	-0.657055	5.42e-05	0.0135059	4.98448	4.94737	5.21914	5.59087	5.57587	5.95543
CD44	-0.656282	0.000317028	0.0300462	7.29553	8.33224	6.82003	7.75634	8.86783	7.79247
FNDC3B	-0.652447	8.53e-05	0.0175589	6.529	6.73351	6.21654	7.33317	7.33448	6.76874
MYO1G	-0.64245	0.000806608	0.0419562	7.66788	7.36579	7.62947	7.96839	7.98831	8.6338
RNU6ATAC	-0.642056	0.000168864	0.0242997	6.0658	5.76343	6.36726	6.78406	6.55386	6.78473
C1orf162	-0.637736	0.000377782	0.0312357	6.07855	6.31723	5.54171	6.40206	7.08868	6.35996
PKHD1L1	-0.63433	0.000453443	0.0330404	8.1962	8.62671	9.10212	9.11698	8.97325	9.73778
MMP2	-0.633331	0.000689602	0.0392297	5.00098	5.22895	4.95925	5.27356	6.13926	5.67635
ZFP36L2	-0.632965	0.000343503	0.0309744	7.92546	7.94193	7.70534	8.2599	8.72421	8.48752
SCARNA7	-0.630917	0.000106344	0.0199535	7.18445	7.31056	7.22277	7.78644	7.82998	7.9941
ZBTB20	-0.62848	0.000169133	0.0242997	4.90604	4.91061	4.88143	5.54991	5.35122	5.68239
MS4A6A	-0.616521	0.000132658	0.0215424	3.78201	4.06982	4.04029	4.5346	4.68269	4.5244
CFD	-0.61585	0.000957933	0.0441888	6.54412	6.6713	6.61412	6.78808	7.36239	7.52662
JAML	-0.613802	0.000376281	0.0312357	4.69717	4.47451	4.91322	5.03697	5.1625	5.72683
VWF	-0.612914	0.000534274	0.0360732	8.72382	8.95775	9.13387	9.57206	9.26213	9.82
AFF2	-0.609951	0.000474398	0.0337211	5.68845	5.83454	5.35572	6.04064	6.71439	5.95353
SNORD42A	-0.609443	0.000116742	0.0211982	9.18385	9.39977	9.55381	9.7044	9.98537	10.276
HK2	-0.606437	0.000232288	0.0276605	5.20757	6.83714	6.46476	5.99997	7.44389	6.88493
ANKRD36	-0.604477	0.00030784	0.0300462	7.76627	8.20144	7.51751	8.50093	8.55935	8.23836
LAIR1	-0.59838	0.000165634	0.0242997	5.95707	5.99626	5.87814	6.53401	6.73766	6.35494
IFI30	-0.598194	0.000423	0.0322481	5.51331	5.50465	5.85124	5.90084	6.36182	6.40112
KIAA0087	-0.596988	0.0011798	0.0485883	4.21898	4.43926	4.35234	4.54067	5.41687	4.844
INSR	-0.593974	0.000274825	0.0288819	6.07237	6.32635	6.43658	6.65587	6.73808	7.22327
ANXA6	-0.592101	0.000378481	0.0312357	6.47111	6.79335	6.52721	7.03434	7.61792	6.9157
FAM46A	-0.586402	0.000193441	0.025588	6.5371	6.92184	6.66405	6.98929	7.64196	7.25095
SNORA20	-0.586102	0.000187772	0.025371	6.48259	7.49842	7.75167	7.197	8.08665	8.20733
TXNIP	-0.585853	0.000831993	0.0422378	11.3723	11.2272	11.514	11.9828	11.5095	12.3787
