# Supplementary material for: Variants of DNMT3A cause transcript-specific DNA methylation patterns and affect hematopoiesis
Source: Life Sci Alliance. 2018 Dec 13;1(6):e201800153. doi: 10.26508/lsa.201800153 (PMC6293073; doi:10.26508/lsa.201800153)
Supplement: Supplementary file 4 [file LSA-2018-00153_TableS4.xlsx]

## Sheet: Tabelle1
Table S4. Short hairpin RNAs used for the knockdown of individual DNMT3A splice variants.
Transcript	Target	Ensembl	Sequence (5’ to 3’)
	exon	exon ID
Tr.1+3	Exon 5	ENSE00001486208	F:CCGGGAAGGAGACCAACATCGAATCCTCGAGGATTCGATGTTGGTCTCCTTCTTTTTG
			R:AATTCAAAAAGAAGGAGACCAACATCGAATCCTCGAGGATTCGATGTTGGTCTCCTTC
Tr.2	Exon 2	ENSE00001486123	F:CCGGCCTGAAAGACGAGTGTGATACCTCGAGGTATCACACTCGTCTTTCAGGTTTTTG
			R:AATTCAAAAACCTGAAAGACGAGTGTGATACCTCGAGGTATCACACTCGTCTTTCAGG
Tr.4	Exon 4	ENSE00001559474	F:CCGGGGCTGACTCAACTGGAAATTTCTCGAGAAATTTCCAGTTGAGTCAGCCTTTTTG
			R:AATTCAAAAAGGCTGACTCAACTGGAAATTTCTCGAGAAATTTCCAGTTGAGTCAGCC
Scramble	-		F:CCGGTACTAAATCAGCAAGCGCAGGCTCGAGCCTGCGCTTGCTGATTTAGTATTTTTG
			R:AATTCAAAAATACTAAATCAGCAAGCGCAGGCTCGAGCCTGCGCTTGCTGATTTAGTA
Restriction sites are highlighted in blue, the target sequence is highlighted in red, and the loop sequence in black. F = forward primer; R = reverse primer.
