# Supplementary material for: Variants of DNMT3A cause transcript-specific DNA methylation patterns and affect hematopoiesis
Source: Life Sci Alliance. 2018 Dec 13;1(6):e201800153. doi: 10.26508/lsa.201800153 (PMC6293073; doi:10.26508/lsa.201800153)
Supplement: Supplementary file 5 [file LSA-2018-00153_TableS5.xlsx]

## Sheet: Tabelle1
Table S5. Primers for cloning DNMT3A splice variants.
Transcript	Ensembl transcript ID	Assay	Sequence (5’ to 3’)
Tr.1+3	ENST00000264709.7	cDNA	F: ACCCACAGGCTGACAGAGGCACCG
			R: AAGGTTTCCTGTGTGGTAGGCACC
		PCR1	F: GGGCTCAACACCGGGATCTATGT
			R: TTCCGCCTCTGTGGTTTTTGTTT
		PCR2	F: AGTACCGCTAGCTAACTCTCGCCTCCAAAGACCACG
			R: AGTACCTTCGAACAGTTTGCCCCCATGTCCCTTACA
Tr.2	ENST00000380746.8	cDNA	F: GCAGCTACTTCCAGAGCTTCA
			R: GTGGTGTTCTCGTCTCCCTG
		PCR1	F: AGTACCGCTAGCCTGCACCTGGCCTTATGGG
			R: AGTACCTTCGAAGGCAAAGCCCTCCGGTATTT
Tr.4	ENST00000406659.3	cDNA	F: TTCACCAGAGGGCTCAACAC
			R: TGAGTCAGCCCAACTAGGGT
		PCR1	F: GTTCACCAGAGGGCTCAACA
			R: GGGTATCTGCTGCCCTTGAG
		PCR2	F: AGTACCGCTAGCAACTCTCGCCTCCAAAGACC
			R: AGTACCTTCGAAGACCTTTAGCCACGACCCAG
Restriction sites of NheI and BstbI are represented in bold and overhang sequences in italic. F = forward primer; R = reverse primer.
