# Supplementary material for: Variants of DNMT3A cause transcript-specific DNA methylation patterns and affect hematopoiesis
Source: Life Sci Alliance. 2018 Dec 13;1(6):e201800153. doi: 10.26508/lsa.201800153 (PMC6293073; doi:10.26508/lsa.201800153)
Supplement: Supplementary file 6 [file LSA-2018-00153_TableS6.xlsx]

## Sheet: Tabelle1
Table S6. Transcript-specific RT-qPCR primers.
Transcript	Ensembl transcript ID	Binding exon	Ensembl exon ID	Sequence (5’ to 3’)
Tr.1+3	ENST00000264709.7	Exon 5	ENSE00001486208	F: CGAATCCATGAAAATGGAGGGC
		Exon 7	ENSE00003460672	R: TCCTGCAATGACCTTGGCTT
Tr.2	ENST00000380746.8	Exon 2	ENSE00001486123	F: ATCGTAGCCTGAAAGACGAGTG
		Exon 3	ENSE00003460672	R: TGCTTTGGTGGCATTCTTGTC
Tr.4	ENST00000406659.3	Exon 4	ENSE00001559474	F: GAAGCCTCAAGAGCAGTGGA
		Exon 4	ENSE00001559474	R: CCTTTAGCCACGACCCAGAC
GAPDH	ENST00000396861.5	Exon 6	ENSE00003562150	F: TTCGTCATGGGTGTGAACCA
		Exon 6	ENSE00003562150	R: CTGTGGTCATGAGTCCTTCCA
